# Supplementary material for: Single-molecule real-time sequencing identifies massive full-length cDNAs and alternative-splicing events that facilitate comparative and functional genomics study in the hexaploid crop sweet potato
Source: PeerJ journal article supplement (doi:10.7717/peerj.7933), 2019-11-15
Supplement: Additional_file_1._Distributions_of_predicted_ORFs.pdf [file Additional_file_1._Distributions_of_predicted_ORFs.pdf]

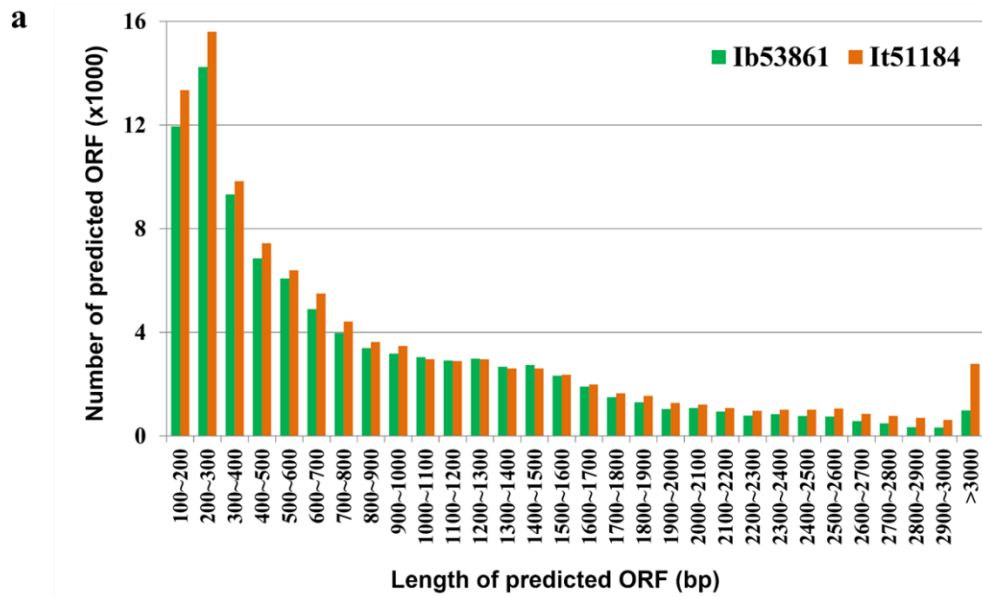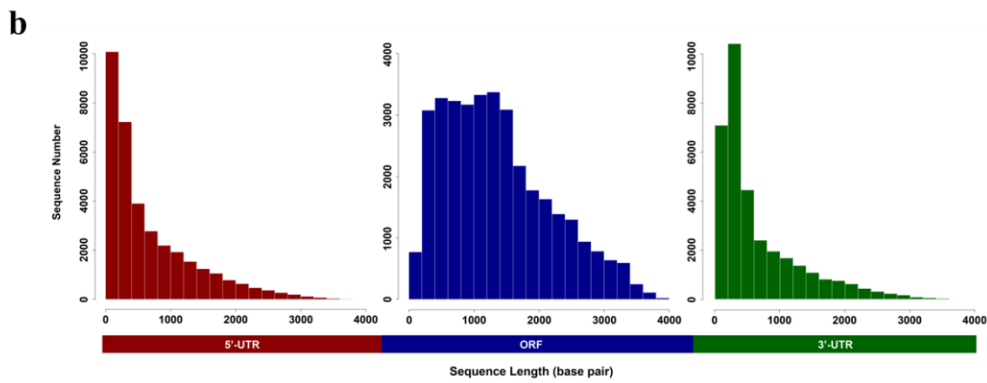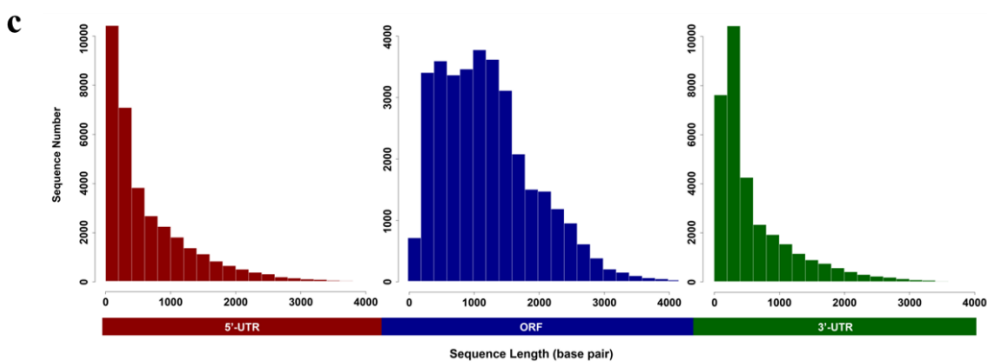

**Additional file 1. Number and length distributions of predicted open reading frames.** (a) Number and length distributions of predicted open reading frames (ORFs) in 53,861 non-redundant transcripts in sweet potato (Ib53861) and 51,184 in *I. trifida* (It51184). (b,c) Number and length distributions of characteristic components of 34,963 non-redundant full-length transcripts in sweet potato (b) and 33,637 in *I. trifida* (c), UTR, untranslated region; ORF, open reading frame.
