# Supplementary material for: Single-molecule real-time sequencing identifies massive full-length cDNAs and alternative-splicing events that facilitate comparative and functional genomics study in the hexaploid crop sweet potato
Source: PeerJ journal article supplement (doi:10.7717/peerj.7933), 2019-11-15
Supplement: Additional_file_6._Identification_of_TFs.pdf [file Additional_file_6._Identification_of_TFs.pdf]

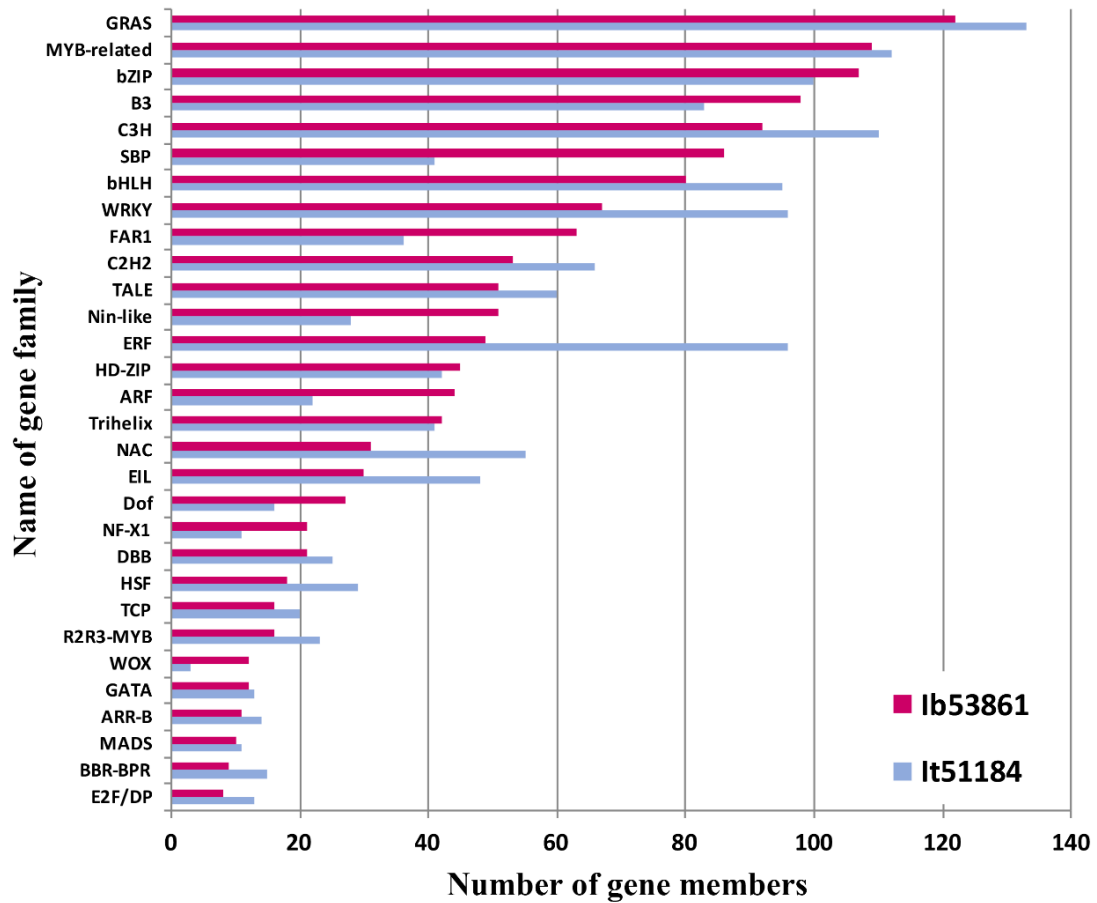

**Additional file 6. Identification of transcription factors from our full-length transcriptomes.** Family names and numbers of putative transcription factors identified from the datasets Ib53861 and It51184.
