# Supplementary material for: Single-molecule real-time sequencing identifies massive full-length cDNAs and alternative-splicing events that facilitate comparative and functional genomics study in the hexaploid crop sweet potato
Source: PeerJ. 2019 Nov 15;7:e7933. doi: 10.7717/peerj.7933 (PMC6859871; doi:10.7717/peerj.7933)
Supplement: File S4 [file peerj-07-7933-s004.xlsx]

## Sheet: Supplementary Table S3. Detaile
Additional file 4. Detailed information for SSRs in I. batatas
Ib53861ID	SSR_nr	SSR_type	SSR	Size	Start	End
c10/f53p11/1693	1	p1	(A)14	14	28	41
c10/f53p11/1693	2	p3	(TTC)7	21	558	578
c10/f53p11/1693	3	p1	(T)10	10	1403	1412
c22/f22p26/2180	1	p3	(TAT)5	15	1971	1985
c29/f11p9/1781	1	p3	(TCT)5	15	548	562
c29/f11p9/1781	2	p1	(T)14	14	1442	1455
c41/f41p10/2195	1	p3	(TAT)5	15	2016	2030
c46/f33p8/2191	1	p3	(TAT)5	15	2016	2030
c60/f4p7/2183	1	p3	(TAT)5	15	1963	1977
c64/f36p11/2063	1	p1	(T)13	13	2036	2048
c93/f8p16/1711	1	p1	(T)13	13	262	274
c93/f8p16/1711	2	c	(CTT)5caccttctat(TTC)6	43	532	574
c93/f8p16/1711	3	c	(T)12aa(T)10	24	1410	1433
c98/f9p3/1707	1	p1	(A)10	10	1522	1531
c98/f9p3/1707	2	p1	(A)10	10	1665	1674
c101/f11p7/2176	1	p3	(TAT)5	15	1968	1982
c106/f20p3/1710	1	p1	(A)14	14	1514	1527
c106/f20p3/1710	2	p1	(A)10	10	1660	1669
c116/f22p10/1798	1	p3	(ATT)5	15	1720	1734
c129/f15p6/1783	1	p1	(T)12	12	268	279
c129/f15p6/1783	2	p3	(TTC)6	18	557	574
c129/f15p6/1783	3	p1	(T)14	14	1458	1471
c129/f15p6/1783	4	p1	(T)10	10	1690	1699
c164/f10p12/1796	1	p3	(ATT)5	15	1723	1737
c200/f11p0/1763	1	p1	(A)10	10	177	186
c204/f6p4/1708	1	p1	(A)10	10	1525	1534
c206/f30p5/1917	1	p1	(C)10	10	52	61
c216/f13p4/1634	1	p3	(AAT)8	24	1572	1595
c217/f26p3/1683	1	c	(AAT)6cataattaaattaaatattgttaatattagtgcagtaattataattattatctctgtttttttcccttcttt(A)10	100	1565	1664
c219/f3p0/1644	1	p1	(T)16	16	1467	1482
c249/f12p3/1784	1	p1	(T)21	21	238	258
c249/f12p3/1784	2	p1	(T)17	17	389	405
c249/f12p3/1784	3	p3	(TCT)6	18	572	589
c249/f12p3/1784	4	p1	(T)15	15	1460	1474
c267/f2p2/2078	1	c	(T)10ag(T)10cttgaatggttttggacctc(T)22	64	1943	2006
c288/f12p4/2245	1	p1	(A)15	15	2223	2237
c289/f11p4/1635	1	p2	(CT)7	14	51	64
c289/f11p4/1635	2	p2	(AT)6	12	1481	1492
c291/f10p4/1880	1	p2	(TC)6	12	231	242
c302/f9p1/1960	1	p2	(TC)6	12	79	90
c303/f20p5/1699	1	p1	(A)13	13	1494	1506
c316/f10p5/2203	1	p3	(CCG)5	15	784	798
c316/f10p5/2203	2	p1	(T)12	12	2038	2049
c325/f18p2/1793	1	p1	(T)12	12	240	251
c325/f18p2/1793	2	p3	(TTC)6	18	561	578
c331/f16p4/2228	1	p1	(A)12	12	2012	2023
c365/f7p0/1793	1	p2	(AG)10	20	64	83
c378/f10p2/1665	1	p3	(AAG)6	18	756	773
c378/f10p2/1665	2	p3	(TCA)11	33	1087	1119
c378/f10p2/1665	3	p2	(AG)6	12	1432	1443
c393/f4p3/1661	1	p3	(AAG)7	21	754	774
c393/f4p3/1661	2	p3	(TCA)8	24	1088	1111
c400/f10p3/1810	1	p1	(A)20	20	1789	1808
c402/f7p2/1885	1	p3	(TCC)8	24	24	47
c413/f10p2/1985	1	p3	(GCC)6	18	513	530
c417/f4p2/1675	1	p3	(AAG)7	21	756	776
c417/f4p2/1675	2	p3	(TCA)12	36	1090	1125
c426/f7p3/1720	1	c	(T)16ggctttggctgttgcat(GACA)8	65	1582	1646
c431/f3p1/1958	1	p2	(TC)6	12	74	85
c453/f14p0/1732	1	p3	(GCG)5	15	81	95
c458/f7p2/1880	1	p3	(TCC)6	18	24	41
c459/f8p1/1773	1	p3	(AAG)6	18	1	18
c461/f8p3/1604	1	p1	(T)10	10	1442	1451
c462/f7p1/1819	1	p1	(A)16	16	58	73
c462/f7p1/1819	2	c	(CATG)5gctgtttctttgttgccgtacgttgttggagatcagatccatcaaagtgcagtggaattaattgttttatcccatgattatactgag(AT)11	129	1524	1652
c463/f11p3/1727	1	p2	(AT)6	12	1579	1590
c464/f12p0/1672	1	p4	(TTTG)5	20	1559	1578
c465/f6p8/1757	1	p1	(T)14	14	1666	1679
c468/f13p6/2050	1	p2	(AT)7	14	104	117
c470/f5p2/1702	1	p2	(GA)22	44	75	118
c470/f5p2/1702	2	p2	(AG)8	16	418	433
c473/f11p7/1711	1	p3	(TCT)5	15	572	586
c473/f11p7/1711	2	p1	(T)15	15	1466	1480
c480/f11p1/1808	1	p1	(A)10	10	1783	1792
c502/f9p2/1802	1	p1	(A)10	10	1758	1767
c517/f4p4/1628	1	p1	(T)12	12	1486	1497
c530/f7p10/1909	1	p3	(ATT)5	15	1717	1731
c533/f4p1/1800	1	p3	(CGG)6	18	942	959
c535/f4p1/1825	1	p2	(AG)6	12	131	142
c538/f5p1/1854	1	p3	(CTG)5	15	252	266
c545/f9p0/1805	1	p2	(TC)6	12	83	94
c547/f7p4/2011	1	p1	(A)12	12	1987	1998
c555/f4p0/1869	1	c	(AG)6gggac(GAA)5	32	80	111
c557/f8p2/1784	1	p2	(CT)7	14	110	123
c560/f15p1/1606	1	p2	(CT)6	12	107	118
c567/f8p5/1955	1	p1	(A)10	10	10	19
c571/f7p4/1862	1	p2	(GA)7	14	17	30
c585/f4p0/2110	1	p1	(A)10	10	107	116
c587/f9p0/1646	1	c	(GA)8(AG)9	34	46	79
c591/f5p4/1780	1	p1	(T)23	23	1618	1640
c598/f8p2/1882	1	p2	(AG)6	12	33	44
c601/f8p0/1688	1	p3	(GCA)5	15	23	37
c608/f10p2/1575	1	c	(T)12ctttttctttttttacttctctccctccctttctaaacttctctctagaacattaacaattgattgagtgatgatgcgcataaagaaagat(GA)8	119	14	132
c611/f8p1/1786	1	c	(AG)6t(AG)8	29	36	64
c618/f7p1/1755	1	p1	(A)14	14	1517	1530
c620/f9p3/1761	1	p1	(A)11	11	14	24
c622/f3p1/1854	1	c	(AC)7(A)18	32	106	137
c622/f3p1/1854	2	c	(CATG)5gctgtttctttgttgccgtacgttgttggagatcagatccatcaaagtgcagtggaattaattgttttatcccatgattatactgag(AT)8	123	1586	1708
c626/f10p0/1713	1	p1	(A)11	11	1565	1575
c628/f9p3/1898	1	p3	(TCA)6	18	665	682
c639/f7p1/2046	1	p2	(TC)6	12	74	85
c640/f3p3/1750	1	p2	(CT)8	16	88	103
c640/f3p3/1750	2	p2	(AT)6	12	1518	1529
c644/f8p1/1873	1	p1	(T)11	11	1711	1721
c647/f5p0/1725	1	p3	(AGA)5	15	58	72
c654/f13p2/1641	1	p1	(A)11	11	1515	1525
c655/f5p1/1981	1	p2	(AG)11	22	24	45
c658/f8p7/2007	1	p5	(TTTGT)5	25	1110	1134
c661/f6p2/1892	1	p2	(CT)9	18	32	49
c661/f6p2/1892	2	p1	(T)16	16	1760	1775
c689/f4p2/2221	1	p1	(T)10	10	2212	2221
c694/f9p1/1699	1	c	(T)12cttcgaattttcccattttatc(T)10	44	85	128
c702/f7p0/1812	1	p3	(TCT)6	18	86	103
c720/f6p3/1653	1	p2	(CT)7	14	1501	1514
c724/f11p2/1705	1	p3	(TAA)5	15	12	26
c731/f6p1/1806	1	p3	(CCG)6	18	223	240
c731/f6p1/1806	2	p3	(CGC)5	15	405	419
c731/f6p1/1806	3	p3	(AAC)5	15	1248	1262
c732/f6p3/1732	1	p2	(CT)9	18	171	188
c732/f6p3/1732	2	p3	(TTA)6	18	1705	1722
c733/f3p2/1792	1	p2	(TC)8	16	16	31
c739/f5p1/2224	1	p1	(T)13	13	2208	2220
c755/f2p0/1690	1	p1	(A)10	10	1278	1287
c759/f7p1/1646	1	p3	(CGG)5	15	440	454
c765/f2p0/1758	1	p1	(A)12	12	1694	1705
c772/f6p0/1808	1	p1	(A)10	10	145	154
c779/f10p1/1816	1	p3	(CTT)6	18	34	51
c784/f6p27/1632	1	p2	(CT)6	12	107	118
c788/f6p1/2000	1	p1	(A)10	10	81	90
c789/f7p2/2054	1	p2	(GA)6	12	6	17
c792/f6p1/1982	1	c	(AG)7ggaggtagttgaagagaggagatagaaagtagctagac(CT)6	64	169	232
c792/f6p1/1982	2	p1	(T)19	19	1811	1829
c802/f3p0/1785	1	p2	(AT)10	20	142	161
c805/f8p3/1849	1	p1	(T)12	12	1755	1766
c812/f8p2/1743	1	p2	(GA)12	24	108	131
c818/f5p1/1600	1	p2	(CT)6	12	38	49
c819/f5p1/2177	1	p1	(T)12	12	1797	1808
c824/f6p0/1609	1	p1	(A)12	12	120	131
c824/f6p0/1609	2	p3	(CCG)6	18	289	306
c824/f6p0/1609	3	c	(ACT)6gtgtgggagttggactaattttggctggtcttgcctgtgctttgctggggtagtgtta(T)10	86	1392	1477
c827/f5p3/2104	1	c	(CT)6tcctcc(TCT)5	33	38	70
c830/f4p0/1964	1	p1	(A)11	11	30	40
c831/f3p0/1836	1	p1	(T)16	16	1681	1696
c839/f8p0/1850	1	p2	(TC)10	20	46	65
c842/f8p0/1854	1	p3	(TTC)6	18	1655	1672
c844/f8p0/1568	1	p1	(T)13	13	60	72
c849/f5p2/1627	1	p1	(A)28	28	5	32
c852/f4p1/1865	1	p1	(T)10	10	1775	1784
c857/f5p1/1864	1	p1	(A)10	10	139	148
c866/f7p1/1696	1	c	(AG)16gagctgtcttgtccttttggtctgagatcccttctttcctttttcccggacggcggcggaagagaaggagacggttttagtggtg(GCA)5	132	18	149
c879/f3p0/2034	1	p2	(TC)7	14	34	47
c884/f7p4/1822	1	p3	(GCC)6	18	350	367
c897/f4p1/1732	1	p1	(T)13	13	1598	1610
c898/f4p0/1714	1	p3	(CGG)5	15	304	318
c898/f4p0/1714	2	p2	(TC)9	18	444	461
c899/f6p1/2079	1	p2	(AG)10	20	25	44
c902/f3p1/1887	1	p2	(CT)16	32	26	57
c902/f3p1/1887	2	p2	(AG)8	16	1703	1718
c906/f5p4/1930	1	c	(GA)7(AG)12	38	33	70
c911/f3p1/1619	1	p1	(A)12	12	1390	1401
c917/f4p1/1780	1	p2	(AT)8	16	1613	1628
c928/f6p0/1697	1	p2	(CA)6	12	1070	1081
c929/f6p2/1718	1	p4	(TATC)6	24	106	129
c930/f5p1/1880	1	p2	(TC)7	14	20	33
c930/f5p1/1880	2	p3	(CGG)6	18	1028	1045
c943/f5p1/1605	1	p2	(TC)6	12	35	46
c945/f3p0/2231	1	c	(GA)10aaaaaattattagtagagagagaagctccagct(GA)8	69	25	93
c950/f5p4/1790	1	p5	(AATTG)5	25	135	159
c955/f13p3/1874	1	p1	(A)13	13	51	63
c957/f3p0/1592	1	p3	(GAA)5	15	1259	1273
c966/f5p1/1842	1	p1	(T)13	13	1684	1696
c969/f5p0/1686	1	p3	(ATC)5	15	1654	1668
c973/f4p1/1857	1	p3	(AGA)7	21	35	55
c980/f4p1/2103	1	p2	(TC)7	14	91	104
c986/f3p0/1852	1	p1	(C)11	11	1715	1725
c990/f4p0/1702	1	p1	(T)11	11	1597	1607
c991/f5p0/2114	1	p2	(AT)6	12	1800	1811
c1010/f4p0/1705	1	c	(GAA)5gagcacaacaccaatgaagagcctgaatccgaaccagattctgatccttcggaagaagagagaagacgaagacgaagac(GAA)6	112	90	201
c1018/f3p2/1702	1	p3	(AGC)6	18	438	455
c1025/f3p0/1792	1	p3	(TCA)5	15	1661	1675
c1026/f4p0/2092	1	p2	(AG)10	20	48	67
c1026/f4p0/2092	2	p2	(AG)6	12	1146	1157
c1044/f6p2/1857	1	p3	(CTC)5	15	1519	1533
c1046/f4p1/1655	1	p2	(GA)10	20	21	40
c1049/f6p1/1922	1	p2	(AG)9	18	58	75
c1051/f3p0/2187	1	p2	(TC)15	30	84	113
c1052/f7p2/1866	1	p3	(AAG)5	15	1448	1462
c1052/f7p2/1866	2	p3	(AAG)6	18	1679	1696
c1062/f5p1/1751	1	p2	(AG)10	20	17	36
c1067/f3p2/1618	1	p2	(AG)10	20	41	60
c1068/f4p2/1631	1	p2	(CT)10	20	1472	1491
c1069/f6p0/2149	1	c	(CT)6(CA)6	24	1797	1820
c1081/f4p0/1646	1	p2	(AG)11	22	43	64
c1082/f3p0/1916	1	p1	(A)10	10	1764	1773
c1086/f5p0/1795	1	p1	(T)10	10	1584	1593
c1092/f5p2/1726	1	p4	(GACA)5	20	1661	1680
c1094/f3p1/1981	1	p2	(AG)9	18	61	78
c1094/f3p1/1981	2	p2	(TC)6	12	350	361
c1096/f5p3/1602	1	p1	(T)11	11	1329	1339
c1096/f5p3/1602	2	p1	(T)11	11	1484	1494
c1111/f5p0/1526	1	p2	(GA)6	12	58	69
c1115/f4p5/1893	1	p3	(GAC)5	15	81	95
c1116/f4p2/1929	1	p2	(AG)12	24	23	46
c1117/f4p0/2041	1	p2	(TC)8	16	20	35
c1117/f4p0/2041	2	p2	(TC)8	16	182	197
c1117/f4p0/2041	3	p3	(CGG)5	15	1181	1195
c1127/f5p2/1760	1	p1	(T)13	13	147	159
c1127/f5p2/1760	2	p1	(T)20	20	1593	1612
c1135/f5p1/1726	1	p3	(GAT)7	21	1338	1358
c1136/f4p0/1782	1	p3	(ATC)5	15	7	21
c1144/f4p19/1933	1	p2	(TC)7	14	37	50
c1148/f6p1/2152	1	p3	(GTG)5	15	1942	1956
c1155/f4p2/1813	1	p3	(AGA)5	15	11	25
c1159/f4p0/1642	1	p2	(TC)7	14	313	326
c1162/f3p0/1854	1	p1	(T)11	11	325	335
c1162/f3p0/1854	2	p3	(TGA)5	15	1715	1729
c1166/f3p0/2293	1	p1	(T)10	10	1988	1997
c1167/f4p0/1828	1	p2	(CT)11	22	44	65
c1171/f3p2/1717	1	p2	(GA)21	42	79	120
c1171/f3p2/1717	2	p2	(AG)7	14	420	433
c1174/f3p1/1624	1	p1	(T)21	21	1462	1482
c1177/f1p1/1592	1	p1	(T)10	10	1188	1197
c1184/f4p3/1896	1	c	(GA)6ggtttagagatacagag(GA)14	57	2	58
c1198/f5p0/1734	1	p1	(T)10	10	1550	1559
c1199/f2p0/2228	1	p3	(GCG)9	27	263	289
c1209/f3p0/1894	1	p1	(A)11	11	165	175
c1218/f5p7/2119	1	p2	(CT)7	14	61	74
c1223/f3p1/1656	1	c	(GAA)5gagcacaacaccaatgaagagcctgaatcggaaccagattctgatccttcggaagaagaagtagaagac(GAA)5	99	110	208
c1225/f4p0/1685	1	p2	(TC)9	18	56	73
c1226/f3p0/1966	1	p1	(T)10	10	1683	1692
c1231/f8p0/1761	1	p1	(T)12	12	1549	1560
c1232/f4p0/2015	1	p2	(TC)7	14	34	47
c1241/f4p0/1645	1	p2	(TC)9	18	66	83
c1244/f3p0/2072	1	p2	(CT)6	12	29	40
c1246/f5p1/1723	1	p1	(A)14	14	254	267
c1254/f3p0/1915	1	p1	(T)12	12	6	17
c1257/f2p0/1817	1	p1	(A)13	13	16	28
c1262/f3p7/2020	1	p2	(AG)7	14	67	80
c1264/f3p0/2091	1	p1	(T)10	10	2050	2059
c1267/f3p1/1825	1	c	(TC)7(TA)6	26	1637	1662
c1269/f4p1/1782	1	p3	(TCT)6	18	86	103
c1292/f3p2/1685	1	p1	(T)11	11	1413	1423
c1300/f3p0/1604	1	p1	(T)13	13	1498	1510
c1303/f5p0/1784	1	p3	(AAT)6	18	1558	1575
c1309/f3p1/1834	1	p2	(CT)8	16	77	92
c1316/f3p0/1699	1	p2	(AG)10	20	3	22
c1318/f3p0/1730	1	p2	(GA)8	16	23	38
c1320/f3p0/2046	1	p1	(T)12	12	1849	1860
c1329/f3p0/1813	1	p2	(CT)10	20	30	49
c1333/f3p1/1736	1	p2	(AT)6	12	1477	1488
c1333/f3p1/1736	2	p1	(T)11	11	1602	1612
c1336/f7p6/2119	1	p2	(CT)8	16	31	46
c1342/f3p3/1624	1	p2	(TC)7	14	70	83
c1342/f3p3/1624	2	p1	(T)10	10	1411	1420
c1343/f4p4/1729	1	p2	(TA)10	20	48	67
c1348/f5p0/2171	1	p3	(TGG)5	15	1741	1755
c1356/f3p0/1779	1	p1	(A)10	10	1755	1764
c1358/f4p0/2127	1	p3	(CCG)5	15	1584	1598
c1358/f4p0/2127	2	p1	(T)11	11	1851	1861
c1364/f3p0/2093	1	p2	(TA)6	12	1868	1879
c1365/f1p1/2101	1	p2	(TA)7	14	64	77
c1368/f3p0/1645	1	p1	(C)13	13	1534	1546
c1376/f4p1/1780	1	p1	(T)10	10	1550	1559
c1377/f6p3/2324	1	p2	(CT)19	38	93	130
c1381/f2p3/1591	1	p2	(CT)7	14	51	64
c1382/f3p0/1736	1	p3	(CTG)5	15	378	392
c1382/f3p0/1736	2	p1	(T)10	10	1654	1663
c1384/f5p0/1797	1	p1	(T)10	10	1692	1701
c1388/f4p1/1649	1	p1	(T)10	10	101	110
c1388/f4p1/1649	2	p1	(T)10	10	286	295
c1389/f1p2/1918	1	p2	(GA)13	26	27	52
c1390/f4p2/1844	1	p1	(A)14	14	173	186
c1391/f4p1/2004	1	p3	(ATG)8	24	1741	1764
c1402/f5p0/1660	1	p4	(TGGT)6	24	1508	1531
c1403/f3p0/2084	1	c	(T)11gg(T)12	25	1984	2008
c1406/f4p1/1661	1	p2	(TA)6	12	1631	1642
c1407/f3p1/1648	1	p1	(T)10	10	20	29
c1408/f6p0/2156	1	c	(CT)6(A)12	24	53	76
c1414/f3p1/1899	1	p1	(T)17	17	1783	1799
c1417/f2p3/1979	1	p1	(T)10	10	20	29
c1418/f6p1/1781	1	p3	(AGT)5	15	958	972
c1426/f6p3/2024	1	p1	(A)10	10	104	113
c1426/f6p3/2024	2	p3	(AGA)5	15	502	516
c1426/f6p3/2024	3	c	(T)10gaatattttg(T)10	30	1957	1986
c1439/f3p0/2215	1	c	(AG)8g(GA)11	39	40	78
c1442/f5p1/1560	1	p1	(T)10	10	418	427
c1443/f3p2/2170	1	p1	(T)10	10	1180	1189
c1447/f3p1/1714	1	c	(TCC)5tcatcatcttcatcgtctc(CTT)11	67	125	191
c1455/f3p2/1771	1	p3	(TCA)6	18	660	677
c1459/f3p0/2055	1	p1	(A)10	10	1906	1915
c1464/f4p1/1953	1	p3	(TCT)6	18	210	227
c1471/f4p0/2022	1	p3	(GAG)6	18	83	100
c1477/f6p0/1773	1	p3	(TGA)5	15	1717	1731
c1480/f3p1/1862	1	p2	(AG)12	24	23	46
c1482/f4p1/1689	1	c	(T)10cttcctttcattttcattagaattttcaacgtttggaaaatagtatgcatagtagaattatgaagttttaaaattcaaaag(A)10	101	1552	1652
c1486/f6p3/1976	1	p2	(CT)7	14	12	25
c1495/f4p2/2141	1	p2	(AG)10	20	27	46
c1495/f4p2/2141	2	p3	(CAG)6	18	1559	1576
c1501/f5p3/1702	1	p1	(T)12	12	1674	1685
c1504/f2p0/2198	1	p2	(AG)8	16	78	93
c1509/f3p2/2146	1	p2	(CT)6	12	29	40
c1509/f3p2/2146	2	p1	(T)10	10	1957	1966
c1516/f4p0/1683	1	p2	(TC)6	12	80	91
c1518/f4p1/1851	1	p3	(GCC)6	18	195	212
c1523/f3p0/1733	1	p3	(CTG)5	15	347	361
c1529/f1p1/1909	1	p2	(GA)6	12	1273	1284
c1530/f13p2/2381	1	c	(GA)6aagagtaggcgagaggag(GA)10	50	72	121
c1531/f4p1/1805	1	p2	(TC)7	14	141	154
c1538/f3p1/1624	1	p1	(T)17	17	1581	1597
c1539/f3p0/1815	1	p1	(T)11	11	145	155
c1543/f4p3/1796	1	p3	(AAT)6	18	903	920
c1548/f3p0/2192	1	p2	(TG)6	12	462	473
c1557/f4p0/1673	1	p3	(GAA)6	18	231	248
c1575/f2p3/1548	1	p1	(T)12	12	1325	1336
c1575/f2p3/1548	2	p1	(T)11	11	1481	1491
c1581/f3p0/1893	1	p1	(T)10	10	1691	1700
c1582/f5p6/2165	1	p1	(T)11	11	1947	1957
c1585/f3p1/2213	1	p2	(GA)6	12	32	43
c1585/f3p1/2213	2	p6	(GAAGGA)5	30	231	260
c1589/f3p2/1795	1	p1	(T)13	13	1521	1533
c1592/f2p0/1864	1	p3	(TTC)5	15	1783	1797
c1593/f3p3/1862	1	p2	(AG)8	16	17	32
c1595/f3p1/1687	1	p1	(A)11	11	1582	1592
c1599/f3p0/2013	1	c	(CT)6(A)13	25	25	49
c1600/f2p1/1981	1	c	(AG)6cgctctgcgttcagtactagaaatgctaaaagtagaaaaatatatcaagtacatatagagagagaa(AG)6	90	37	126
c1600/f2p1/1981	2	p3	(GAA)6	18	403	420
c1604/f2p2/1838	1	p4	(TGGT)6	24	1508	1531
c1605/f3p2/1740	1	p3	(GAA)8	24	27	50
c1609/f3p0/1827	1	p1	(T)22	22	1469	1490
c1614/f4p1/1779	1	p1	(T)19	19	386	404
c1614/f4p1/1779	2	p3	(GGT)5	15	1040	1054
c1616/f4p2/1884	1	p2	(CT)7	14	49	62
c1622/f4p3/1872	1	p2	(AT)6	12	1702	1713
c1623/f5p2/2210	1	p3	(GTG)5	15	670	684
c1627/f4p1/2095	1	p1	(A)15	15	47	61
c1638/f3p0/1951	1	p1	(T)13	13	1661	1673
c1640/f2p1/1453	1	c	(GAA)6cagagctccgattccttggcgccgttgtctgtctt(TC)7	67	11	77
c1643/f2p2/2234	1	p1	(T)18	18	2173	2190
c1645/f3p0/1937	1	p1	(T)11	11	1839	1849
c1651/f2p1/2355	1	p2	(AG)8	16	82	97
c1651/f2p1/2355	2	c	(T)11ctctatagttt(A)14	36	2102	2137
c1653/f2p0/2166	1	p2	(CT)10	20	107	126
c1656/f5p1/2091	1	p2	(AG)11	22	70	91
c1657/f4p0/1691	1	p1	(T)22	22	1608	1629
c1664/f4p0/2170	1	p2	(AG)7	14	110	123
c1664/f4p0/2170	2	p1	(T)14	14	2084	2097
c1669/f3p0/2053	1	c	(CT)6(CA)6	24	1735	1758
c1675/f2p1/1776	1	p1	(T)10	10	1614	1623
c1676/f4p2/1670	1	p3	(GAA)5	15	1	15
c1677/f2p11/1854	1	p1	(T)14	14	1661	1674
c1678/f2p0/2095	1	p3	(TCC)7	21	734	754
c1683/f2p2/1919	1	p2	(GA)7	14	52	65
c1691/f2p0/1635	1	p1	(T)13	13	70	82
c1694/f2p0/1783	1	p3	(TGC)5	15	1458	1472
c1694/f2p0/1783	2	p3	(AGT)5	15	1637	1651
c1703/f2p0/1850	1	p2	(AG)7	14	95	108
c1705/f2p0/1555	1	p3	(CTT)6	18	171	188
c1705/f2p0/1555	2	p1	(T)24	24	1370	1393
c1711/f2p0/2107	1	p3	(TCC)6	18	378	395
c1714/f4p0/1864	1	c	(TA)7aat(AG)6g(GA)8	46	179	224
c1714/f4p0/1864	2	p2	(GA)6	12	1631	1642
c1715/f2p1/1973	1	p3	(TGA)5	15	967	981
c1720/f3p0/1603	1	p3	(AAG)5	15	192	206
c1721/f3p0/1806	1	p1	(A)18	18	24	41
c1723/f2p0/1923	1	p3	(TTA)5	15	1902	1916
c1726/f2p0/2111	1	c	(TGT)9gttttttacttttttccctcttgttttgcaaatgttgaataattgtatagtaataaggtac(T)12	100	2012	2111
c1731/f2p0/1840	1	p3	(GAT)5	15	804	818
c1733/f3p0/1627	1	p1	(T)11	11	1493	1503
c1734/f2p1/1787	1	p1	(A)15	15	179	193
c1736/f2p0/1633	1	p1	(T)10	10	359	368
c1736/f2p0/1633	2	p1	(T)18	18	755	772
c1738/f2p0/1594	1	p1	(A)11	11	7	17
c1742/f2p0/2146	1	p3	(GAA)6	18	1	18
c1743/f2p1/1906	1	p3	(TAT)5	15	1727	1741
c1745/f3p1/1758	1	p1	(T)11	11	45	55
c1746/f2p0/1755	1	p1	(T)10	10	78	87
c1753/f2p2/1722	1	p3	(ATA)5	15	1701	1715
c1757/f2p0/1793	1	p3	(CAA)5	15	224	238
c1759/f2p0/1616	1	p1	(A)10	10	3	12
c1765/f2p0/2050	1	p1	(T)13	13	1838	1850
c1767/f3p0/1607	1	p3	(GAA)5	15	64	78
c1771/f5p0/1745	1	p3	(AGA)5	15	331	345
c1773/f2p2/1951	1	p3	(CTT)5	15	1522	1536
c1779/f3p1/1878	1	p3	(AGA)6	18	15	32
c1780/f3p2/1681	1	p3	(AGA)5	15	1394	1408
c1782/f3p0/1944	1	p2	(TC)7	14	104	117
c1784/f2p0/1667	1	p2	(GA)7	14	119	132
c1790/f2p0/2310	1	p2	(AT)10	20	111	130
c1790/f2p0/2310	2	p1	(T)11	11	2238	2248
c1795/f2p0/1700	1	p1	(T)10	10	1415	1424
c1796/f3p1/2085	1	p3	(TGA)5	15	979	993
c1796/f3p1/2085	2	p1	(T)12	12	2010	2021
c1799/f2p0/1794	1	c	(CT)6ccgtctctctctctttgcgcctacaaatatgggaaggtctcacaaactttcttgcag(CTT)5	84	31	114
c1799/f2p0/1794	2	p1	(T)13	13	1609	1621
c1806/f2p2/1724	1	p3	(AAG)5	15	191	205
c1808/f4p1/1672	1	p1	(A)10	10	1250	1259
c1814/f3p1/1948	1	p3	(CCG)6	18	367	384
c1814/f3p1/1948	2	p3	(AAC)5	15	1390	1404
c1825/f2p2/1580	1	p2	(CT)16	32	26	57
c1831/f2p1/1784	1	p2	(AT)7	14	1609	1622
c1832/f2p1/1625	1	p3	(GAT)7	21	1362	1382
c1835/f2p1/1627	1	p1	(T)14	14	1460	1473
c1837/f2p1/1918	1	p4	(AGAT)5	20	100	119
c1837/f2p1/1918	2	p2	(TA)6	12	1875	1886
c1838/f3p0/1725	1	c	(AG)24acagac(AG)7gagctgtcttgtccttttggtctgagatcccttctttcctttttaccggacggcggcggaagagaaggagacggttttagtggtgga(AGC)5	170	21	190
c1838/f3p0/1725	2	p1	(T)11	11	346	356
c1839/f2p0/1671	1	p2	(AG)12	24	16	39
c1847/f2p1/2099	1	p2	(AG)11	22	25	46
c1847/f2p1/2099	2	p2	(AG)6	12	1148	1159
c1857/f2p1/1686	1	p2	(AT)9	18	1429	1446
c1861/f2p0/1611	1	p3	(CAA)6	18	891	908
c1864/f2p0/1673	1	p2	(GA)6	12	9	20
c1869/f3p0/1836	1	p3	(CTC)5	15	245	259
c1877/f2p0/1610	1	p2	(AG)17	34	171	204
c1884/f4p1/1940	1	c	(CTT)5catcttcattatcaacatcatcatcg(TCT)6	59	87	145
c1884/f4p1/1940	2	p1	(T)13	13	253	265
c1884/f4p1/1940	3	p1	(A)10	10	1766	1775
c1893/f5p4/1897	1	p1	(A)11	11	1731	1741
c1897/f2p0/1586	1	p4	(AAAG)5	20	1341	1360
c1900/f5p2/2024	1	p3	(GGA)5	15	730	744
c1915/f2p5/1884	1	p1	(T)22	22	1	22
c1916/f1p1/2088	1	p3	(TCA)5	15	1819	1833
c1919/f3p0/2111	1	p3	(AGC)5	15	223	237
c1936/f2p0/1703	1	p2	(TC)6	12	16	27
c1936/f2p0/1703	2	p3	(GAA)5	15	1467	1481
c1937/f2p2/1871	1	c	(AG)6tgtgtt(TG)6tagaatacttgaaaaacag(AGA)5	64	89	152
c1943/f3p0/1565	1	p4	(CCTA)5	20	1312	1331
c1947/f2p3/1743	1	p1	(T)12	12	1703	1714
c1950/f3p0/1684	1	p2	(CT)10	20	29	48
c1953/f4p0/2073	1	p1	(T)13	13	172	184
c1953/f4p0/2073	2	c	(T)11(A)10	21	1916	1936
c1960/f2p0/1863	1	p1	(T)11	11	100	110
c1960/f2p0/1863	2	p1	(A)26	26	1647	1672
c1961/f3p2/2273	1	p2	(AT)6	12	2123	2134
c1964/f2p0/1690	1	p1	(C)10	10	1681	1690
c1968/f2p0/2076	1	p3	(TCC)5	15	404	418
c1969/f2p0/1757	1	p1	(T)12	12	1640	1651
c1970/f2p2/2061	1	c	(A)12gaaagaaaaaagatttttattattgttatgagaatcaatcctactacttctggttctgaagtttccacggttg(A)11	96	33	128
c1989/f2p3/1890	1	p2	(AG)14	28	15	42
c1989/f2p3/1890	2	p2	(AT)7	14	1780	1793
c1992/f2p0/1936	1	p1	(A)35	35	1746	1780
c1993/f2p0/2004	1	p2	(TC)6	12	83	94
c1996/f2p0/1974	1	c	(TC)7(TA)8	30	182	211
c1996/f2p0/1974	2	p2	(GT)6	12	1893	1904
c1997/f2p0/1668	1	p1	(T)15	15	1564	1578
c1999/f2p0/1551	1	p3	(AGC)5	15	554	568
c2001/f2p3/1863	1	p1	(T)12	12	1057	1068
c2002/f3p1/2133	1	p3	(AAG)5	15	162	176
c2002/f3p1/2133	2	p2	(AT)6	12	1913	1924
c2005/f2p0/1540	1	p1	(A)11	11	68	78
c2012/f2p0/1791	1	p3	(CGG)5	15	171	185
c2016/f2p2/2179	1	p3	(TGA)5	15	1577	1591
c2020/f2p2/1594	1	p1	(A)12	12	1562	1573
c2022/f2p1/1776	1	p3	(CTT)6	18	26	43
c2029/f5p2/1981	1	p2	(GA)12	24	49	72
c2030/f3p1/2135	1	p2	(GA)12	24	26	49
c2034/f2p0/1989	1	p2	(TA)6	12	1958	1969
c2063/f3p0/1875	1	p3	(AAT)6	18	306	323
c2065/f6p1/1779	1	p3	(GAA)7	21	74	94
c2088/f2p1/1513	1	p1	(A)10	10	1039	1048
c2089/f2p0/1678	1	p1	(T)16	16	1524	1539
c2095/f2p0/1809	1	p3	(CGA)5	15	480	494
c2095/f2p0/1809	2	c	(AT)10(GT)37	94	1580	1673
c2106/f3p0/2309	1	p2	(AG)9	18	62	79
c2106/f3p0/2309	2	p3	(TAA)5	15	324	338
c2115/f1p3/1949	1	p1	(T)10	10	1753	1762
c2116/f2p1/1617	1	p1	(T)10	10	1181	1190
c2134/f2p1/1851	1	p3	(GTT)5	15	101	115
c2136/f2p0/1692	1	p2	(CT)9	18	41	58
c2137/f2p0/2001	1	p2	(AG)6	12	183	194
c2137/f2p0/2001	2	p1	(A)13	13	476	488
c2138/f2p0/1654	1	p1	(A)21	21	27	47
c2140/f3p0/1697	1	p2	(GA)7	14	80	93
c2140/f3p0/1697	2	p1	(T)11	11	390	400
c2141/f2p0/2323	1	p1	(T)10	10	1279	1288
c2145/f3p1/1962	1	p3	(GCG)5	15	165	179
c2157/f2p0/2040	1	p2	(AT)9	18	1954	1971
c2159/f2p1/1835	1	p3	(GGA)6	18	257	274
c2163/f2p2/1632	1	p2	(AG)8	16	1436	1451
c2164/f3p2/2092	1	p3	(ATG)5	15	314	328
c2178/f2p0/1839	1	p2	(AT)6	12	1826	1837
c2182/f2p1/1644	1	p2	(AT)9	18	1466	1483
c2188/f4p0/1755	1	p1	(T)12	12	38	49
c2191/f4p0/1733	1	p3	(CGC)6	18	701	718
c2201/f2p0/2430	1	p2	(AT)6	12	47	58
c2209/f3p1/1724	1	p2	(TC)6	12	35	46
c2218/f2p0/1914	1	p1	(T)10	10	125	134
c2219/f2p0/1719	1	p3	(TGT)9	27	1620	1646
c2220/f3p1/1789	1	p3	(CGC)6	18	131	148
c2224/f5p0/1859	1	p3	(GAA)6	18	516	533
c2225/f2p0/2076	1	p2	(AG)8	16	55	70
c2228/f2p1/2039	1	p2	(AG)7	14	89	102
c2232/f4p0/1966	1	p2	(TC)6	12	22	33
c2232/f4p0/1966	2	p2	(CG)7	14	391	404
c2232/f4p0/1966	3	c	(T)28gggatgaaaaaattaaagcaagcttatatgatgttgatgtttcaaaataactatgaactgtacgtgtatgcatttcattgaataaaattg(A)15	133	1827	1959
c2233/f4p0/1577	1	p2	(TC)18	36	117	152
c2236/f2p0/1906	1	p1	(T)25	25	96	120
c2236/f2p0/1906	2	p2	(AT)6	12	1632	1643
c2236/f2p0/1906	3	p2	(AT)6	12	1862	1873
c2238/f2p5/1719	1	p3	(CGC)6	18	214	231
c2238/f2p5/1719	2	p3	(AAC)5	15	348	362
c2238/f2p5/1719	3	p3	(TGA)5	15	776	790
c2242/f2p0/1869	1	p1	(T)13	13	1800	1812
c2247/f2p0/1833	1	p3	(AGA)5	15	321	335
c2248/f2p0/2271	1	p2	(TC)7	14	72	85
c2248/f2p0/2271	2	p3	(CAG)6	18	1601	1618
c2253/f2p2/1931	1	p3	(CTC)5	15	1521	1535
c2255/f3p0/2089	1	p2	(TC)7	14	20	33
c2257/f2p1/1616	1	p3	(ATC)5	15	1402	1416
c2258/f2p0/2186	1	p3	(ATG)5	15	308	322
c2259/f2p0/2180	1	p3	(CAA)6	18	1747	1764
c2259/f2p0/2180	2	p1	(A)13	13	1982	1994
c2260/f2p0/1861	1	p1	(T)20	20	1749	1768
c2265/f3p0/2074	1	p1	(T)15	15	136	150
c2275/f2p0/1763	1	c	(T)12ggagaaataagggtttggtttaaatttcgtggaaaaaaaatggcgaattgacgcccaaaagt(GA)7	88	386	473
c2285/f2p0/1679	1	p2	(AT)7	14	1483	1496
c2294/f3p2/1547	1	p3	(GGT)5	15	678	692
c2296/f2p0/1874	1	p1	(T)16	16	1711	1726
c2298/f4p0/1773	1	p1	(A)12	12	1331	1342
c2302/f2p0/1783	1	p3	(CTT)5	15	4	18
c2302/f2p0/1783	2	p1	(A)11	11	1661	1671
c2310/f5p0/2155	1	p3	(CTT)6	18	186	203
c2313/f4p2/1902	1	p3	(AAG)5	15	382	396
c2315/f2p0/1918	1	p1	(T)10	10	1806	1815
c2317/f3p2/1783	1	p4	(TTGT)7	28	1618	1645
c2321/f2p2/1747	1	p2	(GA)18	36	1	36
c2327/f2p0/2057	1	p1	(T)10	10	2009	2018
c2332/f2p0/2025	1	p2	(GA)15	30	7	36
c2336/f3p0/1750	1	c	(AG)8t(GA)6	29	18	46
c2337/f2p2/1854	1	p2	(GA)6	12	49	60
c2346/f2p0/1880	1	p1	(A)25	25	26	50
c2347/f2p0/1629	1	p3	(ATG)8	24	1485	1508
c2351/f2p2/2232	1	p2	(GA)7	14	51	64
c2356/f2p0/1502	1	p3	(GAA)5	15	79	93
c2361/f4p1/1947	1	p2	(GA)8	16	101	116
c2363/f2p0/1848	1	c	(TC)7ttccgtatttcatttcgccataatcttttgctcctctggaaacatccttcccagccagcgccg(CT)8	93	10	102
c2367/f2p0/1843	1	c	(T)19ggatttagttatactttgggactattctcatttcatag(T)10	67	1684	1750
c2369/f2p1/2102	1	c	(T)10gg(T)10	22	1939	1960
c2370/f2p0/2023	1	p1	(A)10	10	86	95
c2370/f2p0/2023	2	p3	(GGA)8	24	1154	1177
c2374/f2p1/1511	1	p1	(T)14	14	1467	1480
c2376/f2p0/1799	1	p1	(T)15	15	115	129
c2376/f2p0/1799	2	p2	(TG)11	22	1629	1650
c2377/f3p0/1738	1	c	(AG)8ac(AG)14	46	62	107
c2389/f3p1/1691	1	p2	(GA)26	52	69	120
c2402/f2p0/1774	1	p1	(T)11	11	1696	1706
c2405/f2p0/1668	1	p3	(CTA)5	15	297	311
c2405/f2p0/1668	2	p1	(T)12	12	1560	1571
c2407/f4p1/1741	1	p2	(CA)6	12	1634	1645
c2411/f2p3/2161	1	p3	(GAA)7	21	3	23
c2412/f2p3/1722	1	p2	(TC)6	12	37	48
c2413/f2p0/1584	1	p2	(TC)8	16	2	17
c2414/f2p0/1588	1	p1	(T)19	19	1494	1512
c2421/f4p0/2154	1	p3	(TCT)8	24	14	37
c2422/f2p0/1767	1	c	(TA)7atctaaaaggagaatttt(A)10	42	1622	1663
c2432/f2p0/1826	1	p2	(GA)8	16	1	16
c2437/f3p1/1709	1	p1	(T)11	11	1644	1654
c2440/f2p2/1549	1	c	(AG)7ac(AG)10	36	20	55
c2446/f2p0/1563	1	p2	(TA)6	12	1419	1430
c2452/f2p3/1770	1	c	(AAT)6cataattaaattaaatattgttaatattagtgcagtaattataattattatctctgtttttttcccttcttt(A)10	100	1550	1649
c2454/f3p0/1732	1	p3	(CCA)6	18	93	110
c2455/f2p1/1842	1	p3	(CCA)6	18	1678	1695
c2457/f1p0/1796	1	p1	(T)12	12	1785	1796
c2458/f2p0/1913	1	p3	(AAG)6	18	2	19
c2461/f2p0/2211	1	p3	(TCT)5	15	33	47
c2461/f2p0/2211	2	p2	(CT)6	12	246	257
c2466/f2p1/2202	1	p3	(CTT)8	24	229	252
c2468/f2p1/2191	1	p2	(TA)6	12	1060	1071
c2477/f2p2/2206	1	p2	(AG)9	18	100	117
c2477/f2p2/2206	2	p3	(GAG)7	21	1183	1203
c2479/f2p0/1858	1	p1	(C)11	11	1828	1838
c2481/f2p0/1703	1	p2	(AG)10	20	65	84
c2487/f1p1/1926	1	p2	(TC)6	12	34	45
c2492/f3p1/1894	1	c	(T)10cttggggtttctagattggtgtgaagagtttgaaatgtattttggtagctaattaggagtga(AG)6	84	1758	1841
c2504/f2p0/1591	1	p2	(TC)12	24	24	47
c2504/f2p0/1591	2	c	(A)11gggttcaactccagcttttcaaaagttaaggccccag(GAA)8gcaataagtg(TTA)5ttttgttttttcttaaggtttcagaaacatattctgaaatgtttgcagaaggatagttactagttagaaggt(AGA)5	184	1357	1540
c2505/f2p0/1623	1	p3	(CCA)5	15	330	344
c2517/f2p0/1593	1	c	(TAT)9ctggtaaatatgaatactgg(TAATAT)5	77	150	226
c2524/f3p0/1850	1	p2	(TC)16	32	8	39
c2524/f3p0/1850	2	p1	(T)15	15	217	231
c2524/f3p0/1850	3	p3	(ACC)5	15	1177	1191
c2524/f3p0/1850	4	p3	(CCA)6	18	1353	1370
c2528/f2p1/1804	1	p3	(TAT)8	24	1780	1803
c2548/f2p5/2034	1	p2	(TC)11	22	46	67
c2554/f3p0/2204	1	p3	(CGG)5	15	206	220
c2562/f2p0/1724	1	p1	(A)10	10	140	149
c2563/f3p1/1718	1	p3	(CGC)5	15	1245	1259
c2566/f2p0/1995	1	p1	(T)13	13	1098	1110
c2572/f3p0/1948	1	p3	(GCG)5	15	89	103
c2574/f3p0/1691	1	p1	(A)10	10	27	36
c2576/f4p0/1604	1	p2	(AG)6	12	109	120
c2583/f4p1/1673	1	p1	(T)10	10	1453	1462
c2586/f2p0/2090	1	p1	(T)10	10	92	101
c2590/f3p0/1986	1	p3	(GGA)5	15	182	196
c2590/f3p0/1986	2	p3	(TCT)8	24	1533	1556
c2597/f2p0/1633	1	p1	(T)11	11	66	76
c2598/f3p1/1957	1	p3	(AGA)5	15	30	44
c2598/f3p1/1957	2	p3	(TCC)6	18	171	188
c2601/f6p45/1781	1	p3	(CTA)5	15	1558	1572
c2605/f2p0/1913	1	p3	(GCA)5	15	1474	1488
c2605/f2p0/1913	2	p1	(A)10	10	1820	1829
c2608/f2p1/1853	1	p1	(A)10	10	59	68
c2608/f2p1/1853	2	p3	(GCC)5	15	1063	1077
c2608/f2p1/1853	3	p1	(T)10	10	1789	1798
c2609/f3p1/1861	1	p1	(A)25	25	142	166
c2630/f4p0/2049	1	p1	(T)10	10	1890	1899
c2636/f3p6/2164	1	p1	(A)10	10	1837	1846
c2639/f2p0/1983	1	p2	(AG)6	12	170	181
c2639/f2p0/1983	2	c	(T)10atttaaaaac(A)16	36	441	476
c2639/f2p0/1983	3	p1	(A)12	12	1512	1523
c2643/f2p0/1992	1	p2	(CT)11	22	46	67
c2643/f2p0/1992	2	p1	(T)10	10	1833	1842
c2649/f4p0/1900	1	c	(A)10tgtgctctgta(T)16	37	1675	1711
c2651/f3p1/1841	1	c	(AG)7gggaagcaagagcccaaaaccattttct(AG)7	56	90	145
c2651/f3p1/1841	2	p3	(ATA)7	21	1726	1746
c2655/f3p2/1803	1	p3	(GAA)5	15	36	50
c2655/f3p2/1803	2	p1	(A)11	11	1786	1796
c2664/f1p0/1667	1	p3	(CAA)5	15	469	483
c2666/f1p0/1657	1	p3	(TTC)6	18	214	231
c2668/f1p1/1962	1	c	(T)16gtggtttcttggaaatggtttaattttctgagtttttggggg(A)10	68	363	430
c2668/f1p1/1962	2	p3	(AAC)5	15	1392	1406
c2671/f1p0/1900	1	p1	(T)10	10	1837	1846
c2677/f1p0/1628	1	p1	(T)14	14	1438	1451
c2691/f1p2/2241	1	c	(A)14gaaagaaaaaagattttttattattgttatgagaatcaatcctactacttctggttctgaagtttccacggttg(A)12	100	11	110
c2699/f2p1/1947	1	p2	(AG)7	14	61	74
c2699/f2p1/1947	2	p2	(TC)6	12	359	370
c2710/f1p0/1859	1	p1	(T)11	11	1843	1853
c2716/f1p0/2096	1	p2	(AT)7	14	758	771
c2719/f1p0/2163	1	p1	(T)12	12	2068	2079
c2728/f1p0/1683	1	p3	(AGA)5	15	905	919
c2729/f2p0/1642	1	p1	(T)15	15	1628	1642
c2753/f1p1/2130	1	p2	(GA)6	12	1494	1505
c2754/f1p0/1636	1	p4	(TTTG)5	20	848	867
c2765/f1p0/1773	1	c	(T)12ataaattatttttcccactcaaatataatatattttttaaaattactgttcatgtattttgaatcttatagggatagaattttatgtacaaaatg(A)10	117	1496	1612
c2765/f1p0/1773	2	p1	(A)10	10	1739	1748
c2769/f1p0/1578	1	p2	(AG)6	12	33	44
c2769/f1p0/1578	2	p2	(AT)8	16	1265	1280
c2770/f1p1/1574	1	p1	(A)10	10	8	17
c2771/f2p3/1746	1	p3	(TGA)6	18	83	100
c2774/f1p0/1869	1	p3	(AGA)6	18	95	112
c2779/f3p0/1654	1	p3	(TAT)7	21	1510	1530
c2784/f1p0/1755	1	p1	(A)10	10	140	149
c2785/f3p0/1709	1	p2	(CT)11	22	30	51
c2789/f1p0/2105	1	p2	(AG)15	30	97	126
c2797/f1p0/1647	1	p3	(GGC)6	18	1179	1196
c2797/f1p0/1647	2	p1	(T)11	11	1599	1609
c2800/f1p0/2141	1	p2	(AG)7	14	2	15
c2808/f1p1/1850	1	p2	(AT)6	12	1677	1688
c2814/f1p0/1351	1	p1	(T)10	10	1149	1158
c2815/f1p0/1698	1	p3	(CAC)8	24	595	618
c2817/f1p1/1777	1	p3	(GAA)5	15	578	592
c2818/f1p2/1943	1	p2	(AG)8	16	40	55
c2823/f4p1/1582	1	p2	(TA)6	12	1449	1460
c2830/f1p0/1929	1	p1	(T)11	11	345	355
c2830/f1p0/1929	2	p1	(A)11	11	466	476
c2831/f3p0/1717	1	p1	(T)12	12	67	78
c2836/f1p0/1823	1	p3	(TCC)5	15	245	259
c2836/f1p0/1823	2	p1	(T)10	10	1648	1657
c2839/f1p2/2229	1	p1	(A)13	13	1631	1643
c2853/f1p1/1983	1	p1	(T)11	11	1167	1177
c2877/f1p1/1674	1	c	(CT)14acttcggttgctgtgctgtgctgttgtatacagccagcttctgtcattctattgcccttgaagac(GAA)5	108	138	245
c2878/f1p1/2059	1	p2	(AT)6	12	1898	1909
c2879/f2p0/1550	1	p2	(AT)7	14	406	419
c2885/f3p3/2150	1	p1	(T)10	10	2139	2148
c2887/f6p2/1658	1	p3	(GGT)5	15	718	732
c2890/f1p5/1739	1	p2	(TC)8	16	174	189
c2898/f3p1/1885	1	p2	(AG)9	18	5	22
c2903/f1p0/1717	1	p1	(T)10	10	1687	1696
c2909/f1p0/2260	1	p2	(TC)7	14	80	93
c2912/f3p6/2225	1	p2	(AG)12	24	143	166
c2914/f1p0/1974	1	p3	(AAG)5	15	1542	1556
c2917/f5p1/1684	1	p4	(TTGT)6	24	1521	1544
c2936/f1p0/1805	1	p1	(T)23	23	2	24
c2936/f1p0/1805	2	p3	(TTA)6	18	413	430
c2936/f1p0/1805	3	p2	(TA)6	12	665	676
c2936/f1p0/1805	4	p3	(ATA)5	15	1009	1023
c2940/f1p0/2234	1	p4	(AATC)5	20	181	200
c2940/f1p0/2234	2	p1	(T)12	12	2207	2218
c2957/f3p0/1721	1	p3	(TTC)6	18	16	33
c2961/f1p2/2072	1	p2	(GA)9	18	189	206
c2998/f1p0/2023	1	p1	(A)10	10	768	777
c3000/f1p0/2376	1	p2	(GA)7	14	46	59
c3001/f1p0/2246	1	p2	(TC)7	14	34	47
c3009/f2p2/1958	1	p3	(ATG)5	15	211	225
c3011/f1p1/1829	1	p3	(CTT)5	15	544	558
c3011/f1p1/1829	2	p1	(T)22	22	1738	1759
c3012/f1p0/1851	1	p1	(C)10	10	1075	1084
c3012/f1p0/1851	2	p1	(T)10	10	1787	1796
c3013/f1p2/1591	1	p1	(A)14	14	1496	1509
c3039/f1p0/1719	1	p1	(A)108	108	1611	1718
c3048/f2p1/2039	1	c	(AG)7ttaaagcatctaactttccagcgcggcagcgaaagagatttctgggttttttg(T)10	77	16	92
c3048/f2p1/2039	2	p3	(CCG)6	18	300	317
c3060/f1p3/1634	1	p1	(A)13	13	29	41
c3060/f1p3/1634	2	p3	(TTC)6	18	553	570
c3060/f1p3/1634	3	p1	(T)19	19	1384	1402
c3062/f1p1/2034	1	p2	(AG)6	12	167	178
c3085/f1p0/1918	1	c	(GA)8(AG)10	36	322	357
c3089/f1p0/2057	1	p2	(GA)10	20	51	70
c3090/f1p0/1640	1	p1	(T)10	10	656	665
c3092/f1p0/1656	1	p2	(CT)10	20	43	62
c3092/f1p0/1656	2	p2	(AG)6	12	1473	1484
c3093/f1p1/2229	1	p1	(T)12	12	2009	2020
c3106/f4p0/2192	1	p3	(GTA)5	15	1	15
c3109/f6p1/1737	1	p3	(CGC)5	15	92	106
c3122/f1p5/1899	1	p2	(CT)6	12	36	47
c3127/f1p0/2068	1	p2	(GA)6	12	44	55
c3129/f1p0/2058	1	p2	(CT)9	18	74	91
c3131/f1p0/1935	1	p1	(T)16	16	1796	1811
c3141/f1p0/1949	1	p1	(T)12	12	103	114
c3141/f1p0/1949	2	p1	(T)10	10	274	283
c3141/f1p0/1949	3	p3	(TCA)5	15	796	810
c3141/f1p0/1949	4	p3	(TCA)6	18	1359	1376
c3141/f1p0/1949	5	p2	(AT)6	12	1750	1761
c3142/f2p0/2070	1	p1	(A)10	10	1582	1591
c3142/f2p0/2070	2	p1	(T)10	10	1720	1729
c3147/f2p0/1672	1	p1	(A)27	27	1522	1548
c3150/f1p0/1729	1	p1	(T)24	24	4	27
c3172/f1p0/1919	1	p1	(T)10	10	194	203
c3175/f1p0/1170	1	p1	(C)13	13	65	77
c3175/f1p0/1170	2	p3	(AAT)5	15	378	392
c3193/f1p0/2071	1	p3	(ATG)5	15	286	300
c3198/f1p0/2057	1	p1	(A)10	10	1848	1857
c3200/f1p1/2007	1	p1	(T)13	13	1772	1784
c3209/f2p2/1768	1	p2	(TC)7	14	24	37
c3209/f2p2/1768	2	c	(GAA)14gcaataag(TAT)5ttctttg(T)12cttaaggtttcagaaacatattctgaaatgtttgcagaaggatagttactagttagaaggt(AGA)6	163	1376	1538
c3228/f3p0/1602	1	p3	(AAC)5	15	577	591
c3235/f1p0/2191	1	c	(A)10ttcattccattacccataaaatattcaatcccattgccccataaagtattcaatcccactaccccataaagtagctttgtctgaagtaagg(T)11	112	872	983
c3235/f1p0/2191	2	p1	(T)13	13	1094	1106
c3237/f1p0/2375	1	p2	(CT)6	12	26	37
c3240/f3p1/1807	1	p1	(T)16	16	1591	1606
c3248/f2p0/2000	1	p1	(T)24	24	1774	1797
c3250/f2p0/1594	1	p2	(TC)9	18	24	41
c3250/f2p0/1594	2	c	(GAA)15gcaataag(TAT)5ttctttg(T)10cttaaggtttcagaaacatattctgaaatgtttgcagaaggatagttactagttagaaggt(AGA)7	167	1374	1540
c3251/f1p0/1876	1	p1	(T)17	17	1789	1805
c3252/f1p0/1534	1	p2	(AG)7	14	1386	1399
c3256/f1p0/1948	1	p1	(A)12	12	1850	1861
c3263/f2p2/2305	1	p1	(T)18	18	2208	2225
c3285/f1p0/1918	1	p2	(TA)7	14	37	50
c3285/f1p0/1918	2	p4	(TTTA)5	20	1820	1839
c3298/f1p0/1693	1	c	(CT)14t(TC)7	43	69	111
c3315/f1p0/2063	1	p1	(T)11	11	2006	2016
c3323/f1p0/1855	1	p1	(T)28	28	1	28
c3339/f1p0/1995	1	p4	(TTTA)5	20	116	135
c3340/f2p0/1830	1	p1	(T)11	11	676	686
c3350/f1p1/1915	1	p2	(TC)12	24	44	67
c3352/f2p2/1969	1	p2	(AG)11	22	127	148
c3355/f2p0/1824	1	p1	(T)10	10	1676	1685
c3357/f1p0/1819	1	p3	(GAT)5	15	1207	1221
c3357/f1p0/1819	2	p3	(TGA)6	18	1590	1607
c3361/f3p0/2076	1	p1	(T)13	13	1962	1974
c3368/f1p1/2006	1	p1	(T)11	11	1813	1823
c3377/f1p0/2010	1	p2	(AG)11	22	133	154
c3382/f1p1/1720	1	p3	(ATT)5	15	1609	1623
c3394/f1p2/2033	1	p1	(T)40	40	651	690
c3396/f1p1/1703	1	p2	(AG)7	14	22	35
c3403/f1p0/1476	1	p1	(A)14	14	1383	1396
c3417/f1p0/1896	1	p1	(T)10	10	890	899
c3417/f1p0/1896	2	p1	(T)11	11	1631	1641
c3439/f1p0/1662	1	p3	(TTA)7	21	1506	1526
c3448/f1p0/1750	1	p3	(GCG)5	15	326	340
c3449/f2p0/1746	1	p1	(T)23	23	1593	1615
c3452/f1p0/1965	1	p1	(A)10	10	1892	1901
c3458/f1p0/1566	1	p2	(TC)9	18	30	47
c3463/f1p0/2070	1	p5	(GTTTT)5	25	1978	2002
c3468/f1p0/1833	1	c	(T)15ataacttatttttcccactcaaatataatatattttttaaaattactgttcatgtattttgaatcttatagggatagaattttatgtacaaaatg(A)12	122	1501	1622
c3468/f1p0/1833	2	p1	(A)10	10	1749	1758
c3473/f1p1/2012	1	p3	(TCC)5	15	390	404
c3496/f1p4/2138	1	p2	(TC)11	22	84	105
c3501/f1p0/2042	1	p1	(A)31	31	2011	2041
c3515/f2p0/1987	1	p2	(CT)8	16	205	220
c3518/f1p0/2098	1	p3	(CGC)6	18	560	577
c3518/f1p0/2098	2	p1	(T)14	14	2038	2051
c3519/f1p0/2254	1	p3	(AAG)5	15	150	164
c3519/f1p0/2254	2	p1	(A)17	17	2090	2106
c3523/f2p0/2301	1	p1	(A)11	11	1373	1383
c3532/f1p0/1837	1	p1	(T)13	13	70	82
c3544/f1p1/2218	1	p2	(AG)15	30	59	88
c3562/f1p0/1824	1	p1	(T)22	22	1591	1612
c3562/f1p0/1824	2	p1	(A)10	10	1766	1775
c3569/f1p0/2003	1	p2	(TC)6	12	10	21
c3571/f2p1/2321	1	p2	(CT)6	12	18	29
c3578/f1p0/1635	1	p1	(A)11	11	40	50
c3587/f1p0/1505	1	p1	(T)11	11	1370	1380
c3591/f2p0/1909	1	p1	(T)11	11	157	167
c3601/f1p0/1578	1	p2	(GT)9	18	872	889
c3605/f1p0/1698	1	p1	(T)17	17	1	17
c3605/f1p0/1698	2	p3	(AAC)8	24	790	813
c3621/f2p0/1574	1	p2	(CT)6	12	8	19
c3625/f1p0/1746	1	p4	(ATAG)5	20	428	447
c3637/f1p0/1693	1	p1	(T)11	11	1465	1475
c3638/f1p0/1640	1	p3	(AGA)6	18	585	602
c3638/f1p0/1640	2	p2	(AT)6	12	1620	1631
c3645/f1p0/1785	1	p3	(GAT)5	15	893	907
c3646/f1p3/1956	1	p1	(A)10	10	28	37
c3652/f1p0/1951	1	c	(TG)8(T)13	29	1118	1146
c3654/f1p1/1605	1	p3	(ATA)5	15	1472	1486
c3665/f1p0/2341	1	p2	(CT)7	14	54	67
c3665/f1p0/2341	2	p3	(CCA)7	21	278	298
c3672/f3p1/1634	1	p2	(TC)7	14	74	87
c3673/f1p0/2338	1	p3	(GGC)6	18	446	463
c3673/f1p0/2338	2	p1	(T)10	10	2031	2040
c3675/f3p0/1931	1	p2	(AG)9	18	46	63
c3678/f1p2/2034	1	p2	(TC)8	16	110	125
c3688/f1p0/1857	1	p2	(CA)6	12	6	17
c3688/f1p0/1857	2	p3	(CGG)5	15	214	228
c3692/f1p0/1581	1	p1	(T)14	14	1032	1045
c3695/f1p0/1775	1	c	(ACC)6gccatcaccgccttgtgactaagtaacagcatcatcaacacatatattactaccaatacaaatgcatacatagt(A)13	105	1129	1233
c3695/f1p0/1775	2	p1	(A)10	10	1380	1389
c3697/f1p1/1913	1	p2	(TC)7	14	98	111
c3703/f1p0/2248	1	p3	(TCT)7	21	312	332
c3735/f1p1/1748	1	p2	(TG)12	24	1563	1586
c3745/f1p0/1713	1	p2	(GA)11	22	21	42
c3746/f2p1/1511	1	p2	(AG)6	12	12	23
c3747/f1p1/1706	1	p2	(CT)11	22	1661	1682
c3749/f1p0/1990	1	p3	(TCT)8	24	183	206
c3756/f1p0/2072	1	p3	(AAT)6	18	182	199
c3756/f1p0/2072	2	p1	(T)14	14	1970	1983
c3769/f1p0/1857	1	p2	(TA)8	16	1464	1479
c3778/f5p2/1737	1	p3	(CTT)5	15	165	179
c3778/f5p2/1737	2	p1	(T)12	12	1590	1601
c3784/f1p2/1630	1	p1	(A)17	17	1467	1483
c3797/f1p0/1747	1	p2	(TC)6	12	33	44
c3799/f2p0/1519	1	p3	(TAT)10	30	1347	1376
c3811/f1p0/1736	1	p3	(ACC)5	15	816	830
c3814/f1p0/2251	1	p1	(T)16	16	270	285
c3826/f1p2/2386	1	p1	(T)12	12	2287	2298
c3827/f1p0/1743	1	c	(AGAT)5agaggcagccagagttgtggataagaatgctgccggcaagatatttggtggccgtggtaatttccggcgtgttaatgt(CGG)5	113	129	241
c3827/f1p0/1743	2	c	(T)13aattttttttaa(T)13	38	1703	1740
c3833/f1p1/1943	1	p3	(ATG)7	21	376	396
c3847/f1p0/1810	1	p2	(TC)6	12	66	77
c3848/f1p0/1804	1	p1	(A)21	21	5	25
c3848/f1p0/1804	2	p1	(T)11	11	1744	1754
c3854/f2p8/1560	1	c	(A)16gagtgatttttaa(T)10	39	28	66
c3854/f2p8/1560	2	p3	(TTC)7	21	560	580
c3854/f2p8/1560	3	p1	(T)11	11	1404	1414
c3864/f1p0/1939	1	p1	(T)18	18	1768	1785
c3868/f1p0/2211	1	c	(TCG)6(CCG)6	36	84	119
c3868/f1p0/2211	2	p3	(GAG)5	15	354	368
c3868/f1p0/2211	3	p1	(T)11	11	2019	2029
c3899/f1p0/1721	1	p1	(A)10	10	209	218
c3903/f2p1/2045	1	p3	(ACA)5	15	1895	1909
c3911/f1p0/2113	1	p3	(CGG)6	18	1255	1272
c3930/f1p0/1596	1	p1	(T)10	10	452	461
c3935/f1p0/1731	1	p1	(T)11	11	388	398
c3943/f3p0/1776	1	p3	(TCC)6	18	75	92
c3948/f1p2/2350	1	p1	(T)10	10	139	148
c3949/f1p0/1840	1	p2	(AG)8	16	1	16
c3952/f1p0/1961	1	p3	(CGG)5	15	178	192
c3961/f1p0/2149	1	p3	(TTC)8	24	122	145
c3986/f2p0/1689	1	p3	(CGG)5	15	84	98
c3995/f1p1/2121	1	p3	(CGC)5	15	149	163
c3997/f1p0/1586	1	p1	(T)13	13	1404	1416
c4006/f1p0/1945	1	p1	(A)25	25	1862	1886
c4008/f1p0/1713	1	p1	(A)13	13	1062	1074
c4014/f1p1/2398	1	c	(A)10caaaagaagaagattaataagg(ATA)5	47	2337	2383
c4034/f2p2/1802	1	c	(CTA)5gagagaagagataagaaga(CCTC)5	54	1569	1622
c4034/f2p2/1802	2	p1	(T)15	15	1763	1777
c4037/f1p0/1600	1	p1	(A)12	12	1243	1254
c4038/f1p1/2092	1	p2	(GA)8	16	198	213
c4041/f1p2/2193	1	p1	(A)12	12	2171	2182
c4060/f1p1/2212	1	p1	(T)14	14	2028	2041
c4062/f1p2/1977	1	p1	(A)10	10	7	16
c4063/f1p0/2130	1	p1	(A)13	13	1709	1721
c4068/f1p2/2084	1	p1	(T)24	24	1	24
c4077/f1p0/1769	1	c	(AT)7agtgcaa(TCTTT)7	56	298	353
c4100/f5p3/1797	1	p3	(CAA)5	15	126	140
c4106/f1p0/2172	1	p3	(TCA)6	18	62	79
c4106/f1p0/2172	2	p2	(TA)7	14	1070	1083
c4106/f1p0/2172	3	p2	(GA)9	18	1562	1579
c4108/f3p0/1835	1	p1	(T)11	11	1718	1728
c4119/f1p0/1837	1	p1	(T)17	17	73	89
c4121/f1p0/1961	1	c	(GAA)5cccgaatcaaccaagaaagataaa(AAG)6	57	1640	1696
c4151/f2p2/2025	1	p3	(CGC)5	15	40	54
c4168/f1p0/2044	1	p1	(T)13	13	67	79
c4168/f1p0/2044	2	p3	(CAC)5	15	581	595
c4170/f1p0/1811	1	p1	(T)27	27	1	27
c4181/f1p0/2281	1	c*	(TGT)5(T)20*	34	1058	1091
c4198/f1p0/1990	1	c	(T)12ctttcactctttgcacgatttaccggcattcctcaaattacaacgatcagtgttcacaaccaagataagtatttttgttctttgttc(T)16	115	138	252
c4198/f1p0/1990	2	p1	(A)13	13	540	552
c4199/f1p1/2030	1	p3	(AAG)5	15	1663	1677
c4203/f1p0/2213	1	p3	(GAG)5	15	672	686
c4213/f1p0/1551	1	c	(T)10cctgattagttgaactgtaaagtagtgttgttattcaaaaagagag(T)11	67	1377	1443
c4219/f1p3/2013	1	p6	(AATCCA)6	36	730	765
c4237/f1p0/2279	1	p1	(T)18	18	2052	2069
c4242/f2p0/1713	1	p2	(TC)11	22	92	113
c4242/f2p0/1713	2	p2	(CT)9	18	293	310
c4242/f2p0/1713	3	p3	(CAA)6	18	895	912
c4242/f2p0/1713	4	p1	(A)13	13	1623	1635
c4252/f1p3/1753	1	p1	(T)12	12	1565	1576
c4260/f2p0/2627	1	p3	(TTC)6	18	57	74
c4267/f1p0/2119	1	p1	(A)12	12	56	67
c4273/f1p0/2317	1	p1	(T)18	18	10	27
c4281/f1p0/2351	1	p1	(T)17	17	1792	1808
c4288/f2p1/2304	1	p4	(AGTG)5	20	9	28
c4288/f2p1/2304	2	p3	(TGG)5	15	436	450
c4288/f2p1/2304	3	p1	(A)10	10	2040	2049
c4294/f1p0/1574	1	p3	(GGC)5	15	316	330
c4294/f1p0/1574	2	p3	(ACA)6	18	900	917
c4294/f1p0/1574	3	p2	(TA)6	12	1505	1516
c4315/f3p32/1745	1	p3	(CTA)5	15	1558	1572
c4317/f1p0/2038	1	p1	(A)16	16	1997	2012
c4319/f1p0/2279	1	p2	(TA)6	12	2196	2207
c4321/f1p1/1598	1	p1	(T)10	10	1512	1521
c4345/f1p3/2092	1	p1	(T)10	10	1992	2001
c4361/f3p0/1938	1	p3	(AGT)5	15	1581	1595
c4362/f1p0/1930	1	p2	(CT)8	16	8	23
c4371/f1p0/1877	1	p1	(T)10	10	1701	1710
c4376/f1p0/1841	1	p1	(T)10	10	1633	1642
c4398/f1p0/1778	1	p2	(AG)6	12	973	984
c4399/f1p1/1743	1	p1	(T)14	14	1682	1695
c4409/f1p1/2145	1	p2	(AT)7	14	2106	2119
c4411/f1p0/2017	1	p1	(A)10	10	141	150
c4412/f1p0/1786	1	p3	(CCG)5	15	313	327
c4412/f1p0/1786	2	p2	(TA)9	18	1519	1536
c4416/f1p0/1602	1	p3	(TAT)7	21	1523	1543
c4421/f1p0/2089	1	p2	(CT)8	16	41	56
c4436/f1p0/1989	1	p1	(T)11	11	1797	1807
c4440/f3p3/1907	1	c	(AG)6gtttagagatacagag(GA)21	70	1	70
c4446/f1p11/2264	1	p3	(CTA)5	15	2129	2143
c4460/f1p0/2039	1	p1	(A)10	10	1957	1966
c4464/f1p0/2210	1	p1	(A)17	17	2033	2049
c4472/f1p0/1613	1	p1	(T)14	14	73	86
c4476/f1p0/1857	1	c	(TC)7ta(TC)6	28	120	147
c4478/f1p1/1725	1	p1	(T)10	10	1546	1555
c4489/f1p0/2105	1	p1	(A)11	11	740	750
c4500/f1p5/1945	1	p2	(CT)8	16	55	70
c4504/f1p0/2006	1	p2	(TG)6	12	1172	1183
c4504/f1p0/2006	2	p1	(T)10	10	1791	1800
c4507/f1p0/1830	1	p2	(AT)9	18	1252	1269
c4528/f1p0/1859	1	p2	(AT)6	12	920	931
c4553/f1p1/1533	1	c	(AT)8tttttgcgatattctttttacttgaaggccagaaagaaatgtaaggtcaagttattatatttttgtttattatctttttagcaaattgtaat(TTA)6	126	1367	1492
c4555/f3p2/2221	1	p2	(TC)7	14	19	32
c4560/f1p1/2117	1	p1	(A)10	10	2039	2048
c4565/f1p1/2048	1	p1	(T)11	11	49	59
c4572/f1p0/2273	1	p2	(GA)6	12	6	17
c4574/f1p1/1837	1	p1	(T)10	10	1784	1793
c4575/f1p2/1648	1	p2	(CT)7	14	50	63
c4586/f1p0/1795	1	p1	(A)11	11	140	150
c4605/f1p0/1760	1	p1	(T)15	15	1610	1624
c4612/f1p1/1655	1	p1	(A)11	11	40	50
c4617/f2p0/1878	1	p2	(TC)6	12	57	68
c4620/f1p0/1555	1	p3	(GAT)6	18	270	287
c4622/f1p1/1548	1	p1	(A)11	11	1010	1020
c4628/f1p0/1983	1	c	(CGG)6ggataaccccgccgcggcggcctcggtgacggtgactatggacgccttagtgccgtgcgc(CAA)5	93	557	649
c4628/f1p0/1983	2	c	(CGC)5attcatgcccatggcggcctggttggagaactccctcgatcgcatgccta(CCG)7	86	1451	1536
c4628/f1p0/1983	3	c	(T)11c(T)10	22	1739	1760
c4635/f2p0/2107	1	p3	(ATG)5	15	1449	1463
c4645/f1p0/1880	1	p1	(T)17	17	1837	1853
c4658/f1p0/1607	1	p1	(A)12	12	574	585
c4658/f1p0/1607	2	p1	(A)10	10	688	697
c4675/f2p1/2252	1	p1	(T)10	10	1033	1042
c4695/f2p1/2024	1	p1	(T)13	13	1751	1763
c4703/f1p0/1661	1	p1	(T)11	11	1355	1365
c4713/f2p0/1551	1	c	(T)10cttgttctagaacttcctttcaagcttttctttaattctgttccctgtcatgtaatgttagcgtgcctgcactcaacaattgtagtgattgtgaa(AT)9	123	1397	1519
c4717/f1p2/1927	1	p2	(GA)8	16	1690	1705
c4725/f1p0/1835	1	p2	(TC)6	12	24	35
c4730/f1p0/1887	1	p1	(T)13	13	1	13
c4734/f1p0/1976	1	c	(GGA)5gcgtcgtcaaagctcaagaaagctgccaaaaagatcctcgttcaaacctgtggctccttctctcggagacaccgcacccctgttcttgact(CCG)6	124	208	331
c4737/f1p0/1648	1	p1	(T)15	15	1447	1461
c4741/f1p0/2175	1	p1	(T)22	22	1	22
c4741/f1p0/2175	2	p2	(TA)7	14	1753	1766
c4741/f1p0/2175	3	p1	(T)19	19	2014	2032
c4747/f1p1/1587	1	p1	(T)10	10	32	41
c4757/f1p0/2222	1	p2	(TC)6	12	22	33
c4758/f1p3/1956	1	p2	(GA)6	12	124	135
c4769/f1p0/1896	1	p3	(TGA)5	15	990	1004
c4773/f2p2/1830	1	p2	(CT)6	12	15	26
c4787/f1p0/1961	1	p3	(CTC)5	15	1740	1754
c4788/f1p2/1930	1	p2	(GA)6	12	27	38
c4793/f2p15/2285	1	p2	(TA)10	20	2238	2257
c4808/f1p1/1989	1	p2	(AT)13	26	1841	1866
c4825/f1p0/1654	1	c	(AGA)5attactgaatcaaaaggaaaaatt(A)12	51	206	256
c4830/f1p0/1822	1	p2	(GA)10	20	674	693
c4830/f1p0/1822	2	p1	(T)19	19	1752	1770
c4854/f3p1/2016	1	p1	(T)16	16	1914	1929
c4856/f1p0/1740	1	p2	(TC)12	24	99	122
c4864/f1p0/2222	1	p3	(TTC)5	15	2101	2115
c4870/f1p0/2014	1	p1	(T)10	10	40	49
c4873/f1p0/2116	1	p3	(GAG)6	18	1222	1239
c4893/f1p0/1570	1	p2	(TC)12	24	297	320
c4895/f2p0/1658	1	p1	(T)13	13	450	462
c4897/f1p0/2008	1	p1	(T)10	10	521	530
c4899/f1p0/2406	1	p2	(CT)12	24	92	115
c4906/f1p0/1724	1	p1	(T)24	24	1	24
c4915/f1p0/1964	1	p1	(T)14	14	175	188
c4930/f1p0/1731	1	p1	(T)16	16	114	129
c4954/f1p0/1874	1	p3	(CAC)5	15	274	288
c4985/f1p3/1629	1	p2	(GA)21	42	43	84
c4990/f1p1/1751	1	p2	(CT)6	12	89	100
c4990/f1p1/1751	2	p1	(T)10	10	1388	1397
c5004/f1p0/1997	1	p1	(A)12	12	69	80
c5007/f1p0/1810	1	p3	(TCT)5	15	23	37
c5008/f1p0/1932	1	p1	(T)13	13	1879	1891
c5016/f1p0/1776	1	p1	(T)29	29	1	29
c5019/f1p0/1756	1	p3	(TAT)7	21	771	791
c5019/f1p0/1756	2	p1	(T)10	10	1660	1669
c5027/f2p0/1734	1	p3	(CGG)6	18	884	901
c5031/f1p0/1843	1	p2	(AT)7	14	1771	1784
c5034/f1p0/1845	1	p1	(T)10	10	1627	1636
c5062/f1p0/2249	1	p1	(T)13	13	1695	1707
c5063/f2p0/1774	1	p2	(CT)7	14	51	64
c5067/f1p1/1963	1	p2	(TC)6	12	64	75
c5074/f1p0/1911	1	p1	(T)10	10	684	693
c5074/f1p0/1911	2	p3	(AAT)6	18	860	877
c5079/f1p0/2118	1	p1	(A)10	10	266	275
c5090/f1p1/1800	1	p2	(CT)6	12	24	35
c5092/f9p1/1802	1	p2	(AG)8	16	64	79
c5092/f9p1/1802	2	p3	(GAT)5	15	1149	1163
c5129/f1p1/2270	1	p1	(T)10	10	199	208
c5129/f1p1/2270	2	p1	(A)17	17	2154	2170
c5154/f2p0/2053	1	p1	(T)24	24	328	351
c5169/f1p1/1966	1	p3	(TTG)8	24	142	165
c5175/f2p1/2145	1	p2	(CT)22	44	71	114
c5175/f2p1/2145	2	c	(AT)6tttggttctgggccgtgttttgaatttcatcctcgttgaagcttgatttatttcttc(CT)13	95	230	324
c5175/f2p1/2145	3	p1	(T)12	12	1746	1757
c5179/f1p5/1825	1	p1	(A)12	12	1667	1678
c5180/f1p0/1855	1	c*	(A)10(AAT)6*	26	1828	1853
c5190/f2p2/1701	1	p3	(AAG)7	21	697	717
c5190/f2p2/1701	2	p3	(TCA)10	30	1031	1060
c5191/f1p0/1608	1	p3	(GAA)5	15	73	87
c5194/f1p0/2162	1	p2	(AG)6	12	72	83
c5201/f1p0/1662	1	p1	(T)21	21	1	21
c5201/f1p0/1662	2	p2	(AT)6	12	1534	1545
c5203/f2p1/1766	1	p2	(AG)6	12	89	100
c5204/f1p0/2202	1	p2	(AC)11	22	228	249
c5226/f1p0/1939	1	p2	(TC)11	22	107	128
c5226/f1p0/1939	2	p3	(GCG)5	15	1095	1109
c5231/f1p0/2094	1	p3	(TCC)9	27	344	370
c5263/f2p2/2215	1	p3	(TTC)10	30	223	252
c5268/f1p1/1572	1	p1	(A)12	12	1520	1531
c5269/f1p0/2019	1	p1	(T)20	20	1196	1215
c5270/f1p0/2047	1	p3	(TTC)5	15	117	131
c5273/f1p1/1974	1	c	(AG)6atagagat(AG)11	42	73	114
c5278/f1p0/2325	1	p1	(T)13	13	2313	2325
c5280/f1p0/1889	1	p1	(T)11	11	264	274
c5285/f1p1/1766	1	p3	(GGA)6	18	386	403
c5286/f1p0/2372	1	p3	(GAG)5	15	377	391
c5299/f1p0/2196	1	c	(T)10ccccttttttatgtttctcgaaactgggtaggattttctgctcaaataaaatccagatatttatctgaataaaaactgaaaaaaattg(A)10	108	17	124
c5332/f1p0/1588	1	p1	(T)12	12	1411	1422
c5358/f1p0/2175	1	p1	(T)10	10	1551	1560
c5368/f1p0/1892	1	p3	(GAT)6	18	1430	1447
c5371/f1p1/2220	1	p1	(T)10	10	2166	2175
c5373/f1p1/1673	1	p1	(T)16	16	1537	1552
c5376/f1p0/2169	1	p2	(TA)6	12	2024	2035
c5384/f1p0/1922	1	p2	(CT)7	14	25	38
c5399/f1p0/1863	1	p1	(T)10	10	1750	1759
c5407/f3p1/2019	1	p1	(T)18	18	1905	1922
c5410/f1p0/1872	1	p1	(T)12	12	10	21
c5410/f1p0/1872	2	p2	(CA)8	16	189	204
c5412/f1p0/1855	1	p1	(T)12	12	1708	1719
c5429/f1p1/1788	1	p2	(CT)13	26	40	65
c5448/f1p0/2245	1	p1	(T)10	10	599	608
c5452/f1p0/1784	1	p2	(TG)11	22	597	618
c5458/f1p1/2233	1	p1	(A)12	12	2215	2226
c5461/f1p0/1721	1	p1	(T)10	10	1610	1619
c5469/f2p0/1633	1	p1	(A)11	11	66	76
c5483/f1p2/1961	1	p2	(AG)6	12	941	952
c5491/f1p0/1925	1	p1	(T)11	11	1889	1899
c5511/f1p0/1648	1	p2	(TA)7	14	106	119
c5511/f1p0/1648	2	p3	(ATG)5	15	1457	1471
c5514/f1p21/2042	1	p2	(TC)7	14	65	78
c5515/f1p0/1826	1	p2	(CT)9	18	1	18
c5540/f1p0/1647	1	p3	(AAG)7	21	71	91
c5546/f1p0/1739	1	p1	(A)10	10	13	22
c5546/f1p0/1739	2	p1	(A)10	10	210	219
c5546/f1p0/1739	3	c	(TA)7ccttaaaatttgtttttcctatgtttttgctcattacccagattttgtttctgcttattcccatgtttttacta(T)10	98	351	448
c5551/f2p0/1645	1	p1	(T)17	17	1593	1609
c5554/f1p0/1859	1	p2	(CT)6	12	80	91
c5564/f1p0/2188	1	p3	(CTT)5	15	98	112
c5569/f1p1/1933	1	p2	(CT)8	16	214	229
c5569/f1p1/1933	2	c	(T)11ctttttgttttttgtttc(T)18	47	1849	1895
c5573/f1p0/1985	1	p1	(T)17	17	524	540
c5575/f1p1/1881	1	p3	(ATA)5	15	851	865
c5576/f2p0/1647	1	p3	(TCA)6	18	101	118
c5576/f2p0/1647	2	p2	(CT)6	12	424	435
c5576/f2p0/1647	3	p1	(T)10	10	1578	1587
c5578/f1p2/1672	1	p2	(AT)6	12	1404	1415
c5586/f1p3/1789	1	p1	(T)11	11	1685	1695
c5590/f2p0/1685	1	p2	(GA)7	14	304	317
c5617/f1p3/1722	1	p1	(T)13	13	1511	1523
c5621/f1p3/2317	1	p1	(A)11	11	2170	2180
c5636/f3p5/2011	1	p1	(T)10	10	1982	1991
c5638/f1p0/1826	1	p1	(A)20	20	16	35
c5640/f2p3/1762	1	p1	(T)10	10	128	137
c5640/f2p3/1762	2	p1	(T)11	11	1622	1632
c5644/f1p1/1612	1	p3	(CTT)7	21	171	191
c5644/f1p1/1612	2	p1	(T)17	17	1363	1379
c5648/f1p0/2303	1	p3	(GAT)5	15	277	291
c5665/f1p0/1724	1	p1	(T)10	10	1613	1622
c5686/f1p0/1821	1	p1	(T)15	15	1704	1718
c5690/f2p0/2084	1	p2	(CT)7	14	32	45
c5697/f1p1/2058	1	p1	(A)10	10	34	43
c5697/f1p1/2058	2	p1	(T)12	12	1873	1884
c5714/f2p0/1680	1	p2	(CT)8	16	97	112
c5717/f1p2/1597	1	p3	(TTC)5	15	164	178
c5726/f1p0/1411	1	p1	(A)14	14	1375	1388
c5730/f1p0/1912	1	p2	(AG)8	16	29	44
c5731/f1p2/1838	1	p1	(T)11	11	1735	1745
c5732/f1p1/1982	1	p1	(A)10	10	1722	1731
c5751/f4p0/2080	1	p1	(A)13	13	89	101
c5753/f1p0/1745	1	p1	(T)14	14	696	709
c5753/f1p0/1745	2	p1	(T)11	11	1553	1563
c5759/f2p0/1739	1	p1	(T)13	13	1635	1647
c5765/f1p3/1941	1	p2	(AC)6	12	1874	1885
c5766/f3p1/1656	1	p2	(GA)10	20	62	81
c5773/f1p0/1187	1	p2	(GA)18	36	78	113
c5774/f1p0/1968	1	p2	(TC)6	12	29	40
c5790/f1p0/1711	1	p2	(CT)6	12	2	13
c5791/f1p0/2218	1	p1	(A)11	11	1996	2006
c5801/f2p0/1936	1	p1	(T)11	11	24	34
c5801/f2p0/1936	2	p2	(AG)7	14	197	210
c5805/f1p0/1858	1	p1	(A)10	10	1705	1714
c5826/f2p1/1526	1	c	(ATC)5ataatcaagaacatcctagtaatg(ATC)5	54	839	892
c5839/f1p2/1815	1	p3	(CAG)6	18	1231	1248
c5855/f5p1/1689	1	p1	(T)16	16	1592	1607
c5861/f1p0/1709	1	p1	(T)10	10	1652	1661
c5875/f1p2/1588	1	p2	(GA)10	20	7	26
c5875/f1p2/1588	2	p2	(TG)8	16	1461	1476
c5887/f1p0/2175	1	c	(CT)6(CA)6	24	1780	1803
c5892/f1p0/2215	1	p3	(TCC)5	15	213	227
c5892/f1p0/2215	2	p1	(A)10	10	789	798
c5905/f2p2/1713	1	p1	(A)10	10	1543	1552
c5907/f1p0/2128	1	p1	(T)11	11	515	525
c5910/f1p1/1970	1	p1	(T)27	27	1	27
c5915/f1p0/1850	1	p2	(TA)8	16	1712	1727
c5916/f3p1/1704	1	p3	(GCG)5	15	166	180
c5916/f3p1/1704	2	p2	(TA)6	12	1646	1657
c5924/f1p0/1690	1	p3	(GGC)5	15	381	395
c5924/f1p0/1690	2	p3	(CGG)5	15	529	543
c5927/f1p1/1828	1	p1	(A)10	10	678	687
c5945/f3p0/2237	1	p3	(GCT)5	15	167	181
c5951/f1p0/1927	1	p3	(GAA)5	15	7	21
c5955/f1p2/2192	1	c	(CT)9t(TC)7	33	56	88
c5982/f1p0/1693	1	p4	(CCTA)5	20	1475	1494
c5994/f1p1/2004	1	p3	(GTA)5	15	1908	1922
c6006/f2p0/1859	1	p3	(CAG)6	18	993	1010
c6016/f2p1/2115	1	p1	(T)20	20	212	231
c6016/f2p1/2115	2	p1	(T)15	15	544	558
c6016/f2p1/2115	3	c	(TC)10tg(TA)7	36	667	702
c6018/f2p15/2079	1	p2	(TC)7	14	30	43
c6019/f1p0/1640	1	p2	(GA)6	12	6	17
c6023/f1p0/1800	1	p1	(A)13	13	819	831
c6023/f1p0/1800	2	p1	(A)14	14	1666	1679
c6026/f2p1/2115	1	p1	(A)10	10	401	410
c6030/f1p0/2309	1	p2	(TC)7	14	80	93
c6057/f1p0/1727	1	p1	(T)17	17	803	819
c6067/f1p0/2102	1	p3	(GTT)5	15	37	51
c6069/f1p3/1808	1	p2	(TC)7	14	71	84
c6083/f1p0/1897	1	p2	(AT)8	16	1527	1542
c6085/f1p0/2039	1	p3	(CGC)6	18	266	283
c6094/f1p2/1952	1	p1	(A)11	11	1880	1890
c6105/f1p3/1916	1	p2	(CT)9	18	69	86
c6117/f1p2/1754	1	p1	(T)27	27	1560	1586
c6127/f2p0/1347	1	p2	(GT)6	12	1077	1088
c6145/f1p0/1683	1	c	(GA)6tgcggagaggagagagatagaaccgcggagga(AG)6	56	4	59
c6147/f1p0/1692	1	p1	(T)19	19	1463	1481
c6165/f1p0/2082	1	p2	(TC)6	12	21	32
c6165/f1p0/2082	2	p1	(T)23	23	246	268
c6172/f1p1/1528	1	p3	(TTC)5	15	81	95
c6198/f1p0/2217	1	p2	(TC)6	12	270	281
c6198/f1p0/2217	2	p3	(CGC)5	15	1843	1857
c6202/f2p5/1749	1	p2	(GA)20	40	43	82
c6210/f3p0/1782	1	p2	(AG)11	22	27	48
c6210/f3p0/1782	2	p1	(T)14	14	1650	1663
c6219/f1p0/2123	1	p2	(GA)10	20	61	80
c6247/f2p2/1546	1	p3	(CAA)5	15	1412	1426
c6248/f1p0/2086	1	p3	(GTA)5	15	1988	2002
c6264/f1p0/2067	1	p1	(T)10	10	1064	1073
c6264/f1p0/2067	2	p1	(A)11	11	1354	1364
c6264/f1p0/2067	3	p1	(T)11	11	1517	1527
c6274/f2p0/1778	1	p2	(TA)6	12	1640	1651
c6285/f1p2/1975	1	p1	(A)14	14	28	41
c6302/f1p1/2123	1	p1	(A)65	65	1476	1540
c6308/f1p1/2056	1	p3	(GAA)5	15	247	261
c6309/f7p6/1977	1	p1	(T)19	19	1770	1788
c6313/f1p2/1701	1	p3	(AAG)5	15	213	227
c6320/f1p0/1678	1	p2	(TC)8	16	43	58
c6334/f1p0/2326	1	p1	(T)14	14	1118	1131
c6339/f1p0/2335	1	p3	(CGG)5	15	514	528
c6349/f1p0/1713	1	p3	(GAT)5	15	956	970
c6362/f1p3/1776	1	p2	(CT)7	14	51	64
c6365/f1p0/1734	1	p1	(A)10	10	156	165
c6365/f1p0/1734	2	p1	(T)12	12	1697	1708
c6368/f1p0/1536	1	p1	(T)16	16	1467	1482
c6374/f2p0/2207	1	p1	(A)10	10	2106	2115
c6383/f1p0/1719	1	c	(CT)8ttttctctctctacgaattcctttcttattcaaagctttcagctccaa(TTC)5	79	19	97
c6391/f1p0/2158	1	c	(T)15a(T)10	26	1	26
c6391/f1p0/2158	2	p3	(GCA)7	21	1524	1544
c6391/f1p0/2158	3	p3	(ATG)5	15	1849	1863
c6393/f1p1/1752	1	p1	(T)15	15	50	64
c6393/f1p1/1752	2	p3	(AGA)5	15	1078	1092
c6406/f1p1/1704	1	p2	(AC)6	12	1593	1604
c6408/f1p0/1846	1	p1	(T)10	10	818	827
c6437/f2p0/1462	1	p3	(TAT)7	21	1157	1177
c6445/f1p0/1637	1	c	(GA)6tgcggagaggagagagatagaaccgcggagga(AG)6	56	49	104
c6446/f1p3/2234	1	p2	(CT)9	18	60	77
c6446/f1p3/2234	2	c	(A)10tgaaaagaggtaatttcaatcgtagtgttcagggttcttttgccggcgccgccgcaa(GCG)5	82	220	301
c6470/f1p0/1625	1	p2	(CT)6	12	207	218
c6502/f1p0/1586	1	p3	(GGA)5	15	181	195
c6509/f2p0/1814	1	p1	(T)18	18	155	172
c6519/f3p3/1669	1	p1	(T)20	20	1570	1589
c6533/f1p0/1369	1	p4	(GCTG)5	20	1210	1229
c6538/f1p1/1888	1	p2	(CT)7	14	66	79
c6541/f2p0/1610	1	p2	(CT)6	12	609	620
c6541/f2p0/1610	2	p2	(TG)6	12	729	740
c6541/f2p0/1610	3	p1	(A)14	14	980	993
c6545/f1p1/2038	1	p1	(A)10	10	277	286
c6555/f1p0/1888	1	p1	(T)10	10	1856	1865
c6558/f1p1/2006	1	p2	(CA)9	18	1977	1994
c6561/f1p0/1678	1	c	(AAG)6tcaaagaaggttgacgatgccgatgccgatgccgatgccgacgccgacgctgccccgccgaggatggaggccttgacctgactctgaagaaa(AAG)5	125	599	723
c6563/f2p2/1624	1	p2	(CT)6	12	1	12
c6563/f2p2/1624	2	c	(GCA)5ggctccccgccgcagtaccaacagccacctcagcagtggatgat(GCA)5	74	168	241
c6563/f2p2/1624	3	p3	(GGT)6	18	1252	1269
c6563/f2p2/1624	4	p1	(T)12	12	1540	1551
c6565/f1p0/2268	1	p1	(T)10	10	1992	2001
c6574/f2p0/1662	1	p3	(CGC)5	15	260	274
c6577/f1p0/1549	1	p3	(AGA)5	15	528	542
c6582/f2p3/1978	1	p3	(GAA)7	21	224	244
c6595/f1p0/1908	1	p1	(T)15	15	1691	1705
c6616/f1p0/2035	1	p3	(ATA)5	15	1977	1991
c6639/f1p0/2298	1	p2	(AG)13	26	51	76
c6640/f1p0/1666	1	p1	(T)15	15	1550	1564
c6642/f1p0/1870	1	p2	(AG)20	40	13	52
c6642/f1p0/1870	2	p3	(GAA)5	15	289	303
c6642/f1p0/1870	3	p3	(TGA)5	15	1266	1280
c6649/f1p0/1717	1	p3	(TCT)5	15	71	85
c6649/f1p0/1717	2	c	(CT)9caatct(C)10	34	1442	1475
c6652/f1p0/1893	1	p2	(AG)7	14	7	20
c6671/f1p0/1705	1	p3	(GGC)5	15	428	442
c6671/f1p0/1705	2	p3	(ACA)6	18	1012	1029
c6671/f1p0/1705	3	p2	(TA)6	12	1617	1628
c6680/f1p0/1579	1	p1	(T)18	18	1	18
c6689/f1p1/1940	1	p3	(AAG)7	21	1739	1759
c6698/f1p1/1629	1	p1	(A)12	12	5	16
c6709/f1p0/1848	1	p2	(TC)8	16	83	98
c6711/f3p0/2284	1	p2	(AG)8	16	2211	2226
c6723/f1p0/1829	1	p1	(T)11	11	1754	1764
c6732/f1p1/1633	1	p3	(AGA)10	30	802	831
c6748/f1p0/2106	1	p3	(TAT)5	15	1964	1978
c6776/f2p1/1477	1	p1	(T)12	12	1281	1292
c6791/f1p3/1803	1	p1	(A)10	10	1528	1537
c6791/f1p3/1803	2	p1	(A)10	10	1644	1653
c6799/f1p0/1757	1	p1	(C)10	10	1343	1352
c6799/f1p0/1757	2	p1	(T)21	21	1534	1554
c6812/f1p1/1838	1	p1	(T)13	13	1386	1398
c6815/f1p1/1686	1	p3	(AAC)6	18	1363	1380
c6815/f1p1/1686	2	p2	(GA)10	20	1578	1597
c6838/f2p0/1811	1	p1	(T)13	13	683	695
c6848/f1p1/1948	1	p1	(T)15	15	1731	1745
c6852/f1p0/2022	1	c	(T)20ccc(A)17	40	1880	1919
c6859/f2p0/2029	1	p3	(GAA)6	18	286	303
c6860/f1p1/2010	1	p3	(TCT)6	18	80	97
c6862/f1p0/1637	1	c	(A)11caattaaataaaaccctccaaaccaaaacatattaaaattaattaattcccctccc(A)10taccatctctctgccttttctctctcattttctcatccaaacacatcgcacgcagtagagagagaaaaactgtgtttt(AG)6	167	68	234
c6862/f1p0/1637	2	p1	(T)11	11	1183	1193
c6872/f1p2/1794	1	p1	(A)10	10	556	565
c6876/f1p0/1959	1	p2	(TC)7	14	42	55
c6879/f2p4/2101	1	p2	(AG)7	14	245	258
c6880/f1p0/1691	1	p1	(T)13	13	1579	1591
c6907/f3p0/1758	1	p2	(AT)8	16	1736	1751
c6911/f1p0/2019	1	p3	(GAG)6	18	139	156
c6913/f1p0/2164	1	p1	(T)20	20	124	143
c6914/f1p0/1949	1	c	(T)11gcggcggatatgaggaaatgccgattcatttgctagggttttgac(CT)7	70	120	189
c6917/f1p0/1650	1	p1	(T)22	22	871	892
c6917/f1p0/1650	2	p2	(TA)10	20	1021	1040
c6925/f1p0/1674	1	p3	(GAA)6	18	1354	1371
c6937/f1p0/1661	1	p1	(T)10	10	434	443
c6959/f1p0/1927	1	c	(T)11cgaaaaagagaaagaaaagagaaatgaacccagaagagaaaaacccatttacgca(TTC)7	87	65	151
c6959/f1p0/1927	2	c	(GCA)6gctaacacatgtggctgctgtgctgtttcttctcctcttctctttttttctatgtaattctgtcttcgggaaatttccatgta(T)16	117	571	687
c6962/f1p0/1901	1	p1	(T)23	23	1717	1739
c6966/f1p0/1721	1	p2	(CT)12	24	361	384
c6979/f1p3/1928	1	p1	(T)19	19	1	19
c6980/f1p1/1685	1	p3	(AGT)5	15	181	195
c6994/f1p0/1837	1	c	(T)13cttctagtttctacg(T)11ggtttgtttg(T)13gg(T)18	82	1663	1744
c7000/f2p0/1705	1	p1	(T)12	12	1637	1648
c7014/f1p1/2085	1	p3	(ACT)6	18	72	89
c7018/f1p0/1577	1	p3	(CCG)5	15	192	206
c7018/f1p0/1577	2	p2	(TA)7	14	1397	1410
c7031/f1p1/1645	1	p2	(AG)19	38	5	42
c7042/f1p0/2041	1	p1	(A)12	12	257	268
c7042/f1p0/2041	2	p3	(GCC)5	15	1278	1292
c7060/f1p0/1782	1	p1	(T)11	11	204	214
c7061/f2p0/2117	1	p1	(A)11	11	1899	1909
c7064/f1p0/1634	1	p2	(CT)8	16	41	56
c7068/f1p0/1578	1	p1	(T)11	11	231	241
c7068/f1p0/1578	2	p3	(TCT)22	66	529	594
c7069/f1p1/1956	1	p3	(GCC)5	15	1056	1070
c7076/f2p0/1723	1	p2	(AG)9	18	199	216
c7076/f2p0/1723	2	p3	(ATG)5	15	1693	1707
c7096/f1p0/1813	1	p1	(T)14	14	1795	1808
c7101/f1p0/1965	1	p2	(TC)6	12	64	75
c7110/f1p0/1607	1	p2	(CT)9	18	23	40
c7113/f1p0/2085	1	p1	(T)10	10	1968	1977
c7114/f1p1/1636	1	p1	(A)10	10	1471	1480
c7123/f1p0/1544	1	p2	(AG)11	22	30	51
c7132/f1p1/1837	1	p2	(GA)6	12	475	486
c7136/f1p0/2133	1	p2	(GA)7	14	1678	1691
c7144/f1p0/2055	1	p1	(C)13	13	102	114
c7144/f1p0/2055	2	c	(T)12ctcccttttcttggatttgatttgaccccttctatcatagctgaatgtaaag(CT)10	84	223	306
c7147/f1p1/1857	1	p2	(CT)6	12	35	46
c7162/f1p1/1627	1	p2	(TA)6	12	1446	1457
c7163/f1p0/1974	1	p2	(TC)7	14	1323	1336
c7190/f2p0/1801	1	p2	(AT)6	12	32	43
c7190/f2p0/1801	2	p2	(AG)6	12	278	289
c7216/f1p0/2047	1	p1	(T)12	12	1194	1205
c7218/f1p2/2158	1	p2	(TG)11	22	2094	2115
c7230/f2p0/1949	1	p1	(T)10	10	1843	1852
c7246/f2p1/1727	1	p3	(AAG)5	15	14	28
c7251/f3p0/1583	1	p3	(AGC)6	18	530	547
c7256/f2p0/1533	1	p1	(T)10	10	1461	1470
c7281/f1p1/1817	1	p3	(AGA)7	21	129	149
c7289/f1p1/1513	1	p1	(A)10	10	59	68
c7299/f1p0/1737	1	p1	(T)14	14	469	482
c7304/f1p0/2167	1	p2	(CT)6	12	56	67
c7310/f1p1/2268	1	p1	(T)10	10	30	39
c7322/f1p1/1673	1	p2	(AT)6	12	1463	1474
c7346/f2p0/1583	1	p2	(AT)8	16	1540	1555
c7347/f1p0/2019	1	p3	(TCT)6	18	14	31
c7355/f1p0/1964	1	c	(T)13cctttcttgtttgttaaatc(T)12	45	1863	1907
c7360/f2p2/1853	1	p2	(TC)6	12	31	42
c7360/f2p2/1853	2	p1	(T)10	10	1688	1697
c7361/f4p0/1872	1	p1	(T)12	12	1785	1796
c7367/f2p0/1580	1	p2	(TA)7	14	1419	1432
c7377/f1p0/2151	1	p3	(TCT)5	15	199	213
c7396/f1p0/2088	1	p1	(T)13	13	2052	2064
c7411/f1p0/2069	1	p3	(AGA)6	18	201	218
c7411/f1p0/2069	2	p3	(AGA)8	24	1197	1220
c7414/f1p3/1810	1	p2	(GA)12	24	1	24
c7414/f1p3/1810	2	p2	(GA)8	16	1563	1578
c7419/f1p0/1675	1	p1	(T)11	11	276	286
c7419/f1p0/1675	2	p2	(TG)11	22	1382	1403
c7441/f2p0/2036	1	c	(AAC)5(AGC)6	33	764	796
c7449/f1p1/2368	1	c	(AGC)5(ACT)5	30	115	144
c7450/f1p0/1488	1	p3	(GCT)5	15	945	959
c7461/f1p0/1557	1	p2	(TC)10	20	14	33
c7461/f1p0/1557	2	c	(A)10tacatac(AT)7	31	1324	1354
c7470/f1p1/2225	1	c	(A)12ctgattaatattag(T)16	42	345	386
c7483/f1p1/2113	1	p1	(A)11	11	2100	2110
c7513/f1p2/1945	1	p1	(T)13	13	1852	1864
c7533/f1p0/1964	1	c	(AAG)10aaagaagaagaagtaatttctgtaggctctatcgggcagcagaagaagtaatttctttatactcggttgggcgtgttgatgaagaagaagaaa(AAG)5	138	1648	1785
c7535/f1p0/2200	1	p1	(A)11	11	825	835
c7552/f1p0/1629	1	p1	(A)10	10	454	463
c7555/f1p0/2177	1	p1	(T)25	25	1	25
c7564/f1p0/2273	1	c	(A)10tgtgaacggaagaaaagaaagagagaaggctgtcactgtactctctcacttatcagtgaagactgtcagtcggtgtgaaagtattgaaaagctccaa(AC)14	135	19	153
c7564/f1p0/2273	2	p1	(T)10	10	279	288
c7566/f1p2/1955	1	p3	(CGC)5	15	69	83
c7574/f1p3/1700	1	p1	(T)10	10	1671	1680
c7588/f2p1/1898	1	p1	(A)10	10	1875	1884
c7595/f2p2/1683	1	p2	(TC)6	12	103	114
c7595/f2p2/1683	2	p2	(GA)11	22	1520	1541
c7597/f1p8/1631	1	p2	(CT)7	14	52	65
c7614/f1p0/1719	1	p1	(A)13	13	135	147
c7626/f1p0/1500	1	p1	(T)12	12	471	482
c7633/f2p2/1733	1	c	(GA)8(AG)8	32	44	75
c7634/f1p1/2206	1	p1	(T)14	14	2159	2172
c7650/f1p0/1890	1	p1	(A)10	10	257	266
c7650/f1p0/1890	2	p1	(T)15	15	1719	1733
c7652/f1p0/1619	1	p1	(A)17	17	1179	1195
c7661/f5p10/2082	1	p3	(TAT)5	15	1969	1983
c7663/f1p2/2146	1	p1	(T)18	18	2085	2102
c7664/f1p1/1664	1	p1	(T)19	19	1570	1588
c7667/f1p0/1983	1	p1	(T)10	10	1954	1963
c7669/f1p0/2017	1	p1	(A)17	17	873	889
c7684/f1p3/1730	1	p3	(TGA)5	15	118	132
c7713/f2p1/2128	1	p1	(A)12	12	1968	1979
c7716/f1p0/2093	1	p1	(T)12	12	733	744
c7731/f1p0/2025	1	p2	(TG)7	14	956	969
c7739/f1p0/2329	1	p1	(T)10	10	383	392
c7740/f1p0/2248	1	p2	(AT)6	12	2150	2161
c7743/f1p0/2407	1	p1	(T)12	12	2230	2241
c7745/f1p0/1713	1	p3	(GAA)7	21	1663	1683
c7761/f1p0/2027	1	p1	(T)32	32	1	32
c7767/f1p1/1675	1	p2	(AG)7	14	87	100
c7768/f1p0/1646	1	p2	(TA)6	12	138	149
c7780/f3p0/1805	1	p2	(AG)10	20	110	129
c7787/f1p0/1672	1	p2	(TA)6	12	630	641
c7788/f1p0/1844	1	p1	(T)11	11	279	289
c7799/f1p0/1690	1	p1	(T)12	12	1679	1690
c7803/f1p1/2026	1	p1	(A)11	11	1918	1928
c7811/f1p1/2274	1	p2	(GA)6	12	1788	1799
c7812/f2p1/1710	1	p2	(AG)18	36	34	69
c7812/f2p1/1710	2	p2	(AG)7	14	370	383
c7813/f1p1/1928	1	p1	(T)10	10	1848	1857
c7825/f2p0/2206	1	c	(CAC)5catcat(CAC)6catcaccatcatcatcac(CAT)6	75	1170	1244
c7828/f2p5/2140	1	p1	(T)10	10	2033	2042
c7846/f1p1/1571	1	p3	(CCT)5	15	233	247
c7858/f1p1/1843	1	p2	(CT)8	16	17	32
c7858/f1p1/1843	2	p3	(CTT)5	15	1630	1644
c7874/f1p0/2018	1	p2	(TC)8	16	26	41
c7874/f1p0/2018	2	p3	(TTC)5	15	485	499
c7874/f1p0/2018	3	p5	(AAGGA)6	30	1720	1749
c7879/f1p2/1850	1	c	(CT)6t(TC)6	25	50	74
c7886/f2p0/1771	1	p1	(A)18	18	1537	1554
c7887/f1p0/1844	1	p1	(A)11	11	1651	1661
c7897/f8p4/1798	1	p3	(ATT)5	15	1644	1658
c7912/f1p0/1802	1	p1	(A)11	11	614	624
c7914/f1p0/1603	1	p2	(TC)6	12	42	53
c7917/f1p0/1917	1	p1	(T)17	17	1739	1755
c7926/f2p1/1722	1	p1	(A)12	12	127	138
c7937/f1p0/2240	1	p3	(TGG)5	15	1341	1355
c7937/f1p0/2240	2	p1	(T)12	12	1495	1506
c7938/f1p0/1454	1	p3	(GAC)5	15	419	433
c7943/f1p2/1923	1	p2	(AT)6	12	1716	1727
c7943/f1p2/1923	2	p1	(A)10	10	1845	1854
c7966/f2p0/1865	1	p1	(T)12	12	1770	1781
c7970/f1p2/2228	1	p1	(T)11	11	2047	2057
c7978/f1p0/1747	1	p1	(T)11	11	550	560
c7987/f1p1/2059	1	p1	(A)10	10	153	162
c7987/f1p1/2059	2	p2	(TC)6	12	520	531
c7987/f1p1/2059	3	p3	(CAA)6	18	1101	1118
c7987/f1p1/2059	4	p1	(A)17	17	1829	1845
c7987/f1p1/2059	5	p1	(T)19	19	1968	1986
c7992/f1p3/1701	1	p4	(TTGT)6	24	1505	1528
c8001/f3p3/1702	1	p1	(T)18	18	1569	1586
c8002/f2p1/2013	1	p1	(T)13	13	177	189
c8012/f1p0/1897	1	p1	(A)10	10	79	88
c8022/f2p0/2224	1	p2	(GA)6	12	4	15
c8025/f1p0/2250	1	p1	(T)17	17	2142	2158
c8031/f2p0/2147	1	c	(C)16(T)10	26	158	183
c8053/f1p0/2386	1	p1	(T)10	10	2363	2372
c8055/f2p0/1534	1	p2	(GA)6	12	24	35
c8068/f1p1/1932	1	p2	(CT)12	24	24	47
c8074/f1p1/1638	1	p1	(T)12	12	1448	1459
c8083/f1p1/2332	1	c	(CTT)5caatcc(CT)18	57	19	75
c8104/f1p1/2272	1	p2	(CT)7	14	123	136
c8109/f2p1/1601	1	p2	(AG)6	12	81	92
c8112/f1p1/1973	1	c	(CTA)5gagagaagagataagaaga(CCTC)5	54	1673	1726
c8112/f1p1/1973	2	p1	(T)16	16	1867	1882
c8118/f2p1/1796	1	c	(AG)6a(AG)6	25	57	81
c8139/f1p0/1574	1	p1	(T)14	14	1430	1443
c8152/f5p1/1728	1	p2	(CT)6	12	709	720
c8152/f5p1/1728	2	p1	(T)12	12	1076	1087
c8177/f1p0/1677	1	p1	(T)10	10	1486	1495
c8181/f2p0/2303	1	p2	(TC)6	12	49	60
c8181/f2p0/2303	2	p2	(TC)13	26	208	233
c8181/f2p0/2303	3	c	(CT)9ttttcactttgtccattttctcatcacctacttgacctttttctaggtttgggtttgtcttcagatctcagtatatatcttaactaatgg(T)11	119	396	514
c8181/f2p0/2303	4	p3	(CGG)6	18	1451	1468
c8185/f4p0/2174	1	p1	(A)13	13	1633	1645
c8203/f1p0/1583	1	p1	(T)11	11	1572	1582
c8207/f1p1/2302	1	p1	(T)15	15	231	245
c8207/f1p1/2302	2	p1	(T)13	13	388	400
c8213/f1p0/2045	1	p2	(TC)7	14	107	120
c8215/f2p0/1546	1	p3	(TTC)5	15	86	100
c8236/f1p0/1822	1	p3	(ATC)5	15	1385	1399
c8236/f1p0/1822	2	p1	(T)15	15	1674	1688
c8241/f3p0/1704	1	p2	(GA)6	12	1	12
c8241/f3p0/1704	2	p1	(A)11	11	1511	1521
c8243/f1p0/1723	1	c	(GA)8gtctccattacactgtagcaagccgaccatatatacacatatatacggagta(AT)7aggtgtgaagatatatgtatgcgtaggtaggatacacgatcgagcttttcgatcattagcagtgtgtatttgacgctaacttactgtaattcc(T)12	187	11	197
c8251/f2p3/1863	1	p3	(ATG)6	18	102	119
c8268/f1p0/2299	1	p1	(T)14	14	209	222
c8277/f1p1/1000	1	p2	(TC)20	40	165	204
c8278/f1p1/1898	1	p1	(T)15	15	1824	1838
c8283/f1p0/1860	1	p1	(A)12	12	569	580
c8283/f1p0/1860	2	p1	(T)20	20	1599	1618
c8286/f1p1/2065	1	p3	(AAG)8	24	1646	1669
c8292/f1p4/1694	1	p1	(T)23	23	1	23
c8296/f1p1/2281	1	p1	(T)13	13	1688	1700
c8296/f1p1/2281	2	p1	(A)11	11	1982	1992
c8298/f1p1/2242	1	p1	(T)10	10	1878	1887
c8298/f1p1/2242	2	p1	(T)14	14	2102	2115
c8300/f2p1/1632	1	p1	(A)11	11	1427	1437
c8301/f1p2/1752	1	p4	(TTGT)6	24	1653	1676
c8307/f1p0/1395	1	p3	(ATA)10	30	223	252
c8321/f1p1/1693	1	p2	(AG)11	22	24	45
c8325/f3p1/1895	1	p1	(A)11	11	1756	1766
c8333/f1p6/1973	1	p1	(T)10	10	1884	1893
c8343/f1p3/2042	1	p2	(TC)8	16	23	38
c8343/f1p3/2042	2	p2	(AG)8	16	233	248
c8348/f1p1/2188	1	p2	(GA)9	18	32	49
c8348/f1p1/2188	2	p6	(GAAGGA)5	30	239	268
c8364/f1p0/2137	1	c	(T)14g(T)11	26	1	26
c8365/f1p1/2311	1	p2	(TC)8	16	33	48
c8368/f1p0/1724	1	p3	(CAA)7	21	627	647
c8390/f1p0/1923	1	p3	(AGC)5	15	1225	1239
c8390/f1p0/1923	2	p1	(T)10	10	1790	1799
c8394/f1p2/1692	1	p3	(GCC)5	15	246	260
c8398/f1p1/1744	1	p2	(GA)13	26	20	45
c8402/f2p0/2090	1	p4	(TGCA)5	20	1717	1736
c8412/f1p1/1647	1	p3	(AGA)5	15	930	944
c8419/f1p3/1725	1	p1	(T)12	12	1353	1364
c8422/f2p1/1867	1	p2	(CT)7	14	34	47
c8422/f2p1/1867	2	p1	(T)13	13	168	180
c8422/f2p1/1867	3	p1	(T)18	18	1734	1751
c8428/f1p5/1931	1	p2	(GA)22	44	8	51
c8432/f1p0/1540	1	p2	(TC)7	14	95	108
c8436/f1p2/1622	1	p1	(T)16	16	8	23
c8436/f1p2/1622	2	p4	(TTAT)6	24	168	191
c8436/f1p2/1622	3	p1	(A)12	12	336	347
c8436/f1p2/1622	4	p1	(T)11	11	1451	1461
c8439/f1p0/1692	1	p3	(ATT)6	18	346	363
c8452/f1p0/1608	1	p3	(AAG)5	15	647	661
c8452/f1p0/1608	2	p1	(T)11	11	1054	1064
c8452/f1p0/1608	3	p1	(A)13	13	1572	1584
c8459/f1p1/1639	1	p1	(A)10	10	1597	1606
c8461/f1p0/1705	1	p1	(T)10	10	443	452
c8461/f1p0/1705	2	p1	(T)18	18	1308	1325
c8475/f1p10/1952	1	p2	(CT)8	16	71	86
c8484/f13p3/1142	1	p2	(AG)7	14	95	108
c8484/f13p3/1142	2	p2	(AG)8	16	889	904
c8488/f1p0/1579	1	p3	(ACC)6	18	739	756
c8493/f1p1/1558	1	p2	(CT)7	14	83	96
c8493/f1p1/1558	2	p3	(AGG)6	18	1003	1020
c8494/f1p0/1643	1	p1	(T)11	11	1171	1181
c8502/f1p0/1982	1	p2	(CT)7	14	48	61
c8520/f1p0/1680	1	p1	(A)14	14	1590	1603
c8545/f1p0/1907	1	p2	(AT)9	18	1679	1696
c8546/f1p1/1565	1	p2	(CT)10	20	1323	1342
c8550/f3p2/1752	1	p2	(GA)18	36	131	166
c8550/f3p2/1752	2	p2	(AG)7	14	466	479
c8550/f3p2/1752	3	p1	(T)10	10	1670	1679
c8564/f1p1/1628	1	p1	(T)10	10	851	860
c8568/f1p0/2211	1	p2	(TA)6	12	2190	2201
c8569/f1p0/1655	1	p1	(T)13	13	1596	1608
c8570/f1p0/2068	1	p3	(CAA)5	15	514	528
c8570/f1p0/2068	2	p1	(T)10	10	1108	1117
c8570/f1p0/2068	3	c	(CGC)5gttcatgcccatggccgcctggtgggagaactccctcgatcgcatgcctaa(CGC)6	84	1579	1662
c8570/f1p0/2068	4	p1	(T)16	16	1866	1881
c8576/f1p0/1587	1	p2	(TC)7	14	40	53
c8580/f1p0/1918	1	p2	(AG)7	14	703	716
c8580/f1p0/1918	2	p3	(ATT)5	15	1902	1916
c8585/f1p0/1980	1	p1	(A)10	10	1944	1953
c8601/f1p0/731	1	p3	(CTT)5	15	101	115
c8619/f2p1/2238	1	p1	(A)11	11	1621	1631
c8622/f1p0/2004	1	p1	(A)12	12	1847	1858
c8627/f2p0/2185	1	p1	(C)13	13	2092	2104
c8637/f1p1/1737	1	p1	(A)19	19	1605	1623
c8643/f1p0/1985	1	p1	(T)25	25	1791	1815
c8653/f1p0/1818	1	p4	(TCAC)5	20	6	25
c8654/f2p1/1756	1	c	(AG)6t(GA)11	35	18	52
c8658/f1p0/1798	1	p1	(T)13	13	1623	1635
c8668/f1p0/1461	1	p3	(TGA)6	18	1015	1032
c8675/f1p0/1825	1	p1	(T)11	11	35	45
c8675/f1p0/1825	2	p3	(AAT)5	15	1793	1807
c8676/f1p0/1717	1	p1	(T)29	29	17	45
c8687/f1p1/1978	1	p3	(TCT)5	15	22	36
c8690/f1p0/2252	1	p2	(AG)6	12	1402	1413
c8700/f1p0/1840	1	p3	(AAC)5	15	1246	1260
c8702/f1p0/1841	1	p2	(TC)7	14	33	46
c8706/f1p0/1741	1	p3	(ATC)5	15	137	151
c8710/f1p0/1793	1	p1	(T)10	10	1168	1177
c8713/f1p1/1779	1	p1	(A)22	22	122	143
c8730/f1p0/1661	1	p1	(T)13	13	364	376
c8734/f1p0/1886	1	p1	(C)10	10	1867	1876
c8741/f1p0/1728	1	p2	(TC)6	12	50	61
c8741/f1p0/1728	2	p2	(AT)6	12	1688	1699
c8743/f1p1/1775	1	p2	(CT)6	12	83	94
c8749/f1p0/2138	1	c	(GA)11(AG)15	52	103	154
c8756/f1p0/1779	1	c	(AT)7(GT)19	52	876	927
c8758/f1p0/1709	1	p1	(A)12	12	1625	1636
c8760/f1p2/1934	1	p3	(AGA)5	15	1653	1667
c8760/f1p2/1934	2	p1	(T)10	10	1844	1853
c8764/f1p0/1933	1	p2	(AT)7	14	26	39
c8764/f1p0/1933	2	p2	(TA)6	12	180	191
c8783/f1p0/1757	1	p1	(T)14	14	477	490
c8805/f1p1/1788	1	p2	(AC)6	12	1468	1479
c8809/f1p0/1523	1	p2	(TC)6	12	23	34
c8813/f1p0/1682	1	p2	(GA)13	26	13	38
c8813/f1p0/1682	2	p1	(T)11	11	1469	1479
c8816/f1p1/2046	1	p1	(T)12	12	1997	2008
c8824/f1p0/1470	1	p3	(GAA)5	15	44	58
c8829/f1p1/2221	1	c	(TC)6tggtcatttttgtccaatgaagaagaaatggtttgctggtttccttataattagtattatttttattatatt(A)18gaggttcatgggtagcacggctacccatgtgacttttcttaaagtggggacttttgtccccacgttgctattatttat(A)11	191	583	773
c8851/f1p0/1649	1	p1	(T)19	19	1	19
c8854/f3p2/1877	1	c	(T)11ctttttctttttttacttcactctagaacattaacaattgattgagtgatgatgcacataaagaaagat(GA)7	94	14	107
c8854/f3p2/1877	2	p1	(A)12	12	1545	1556
c8859/f1p1/1608	1	p3	(TAT)6	18	1465	1482
c8895/f1p2/2240	1	p2	(TC)8	16	30	45
c8900/f1p1/2174	1	p3	(GAA)6	18	183	200
c8910/f2p2/1671	1	p2	(AG)8	16	172	187
c8911/f2p0/1677	1	p1	(T)10	10	411	420
c8911/f2p0/1677	2	p6	(AAGATG)5	30	1133	1162
c8922/f5p0/1665	1	p1	(T)11	11	1655	1665
c8927/f2p0/1869	1	c	(GGT)7cctgttccattatcccatactgggaatatggtggttggcggcgggggatgggtggtggaagcaaataatagtaatag(TAA)5	113	144	256
c8927/f2p0/1869	2	p3	(AAC)5	15	390	404
c8955/f1p1/1974	1	p1	(A)10	10	1294	1303
c8964/f1p0/1776	1	p3	(AGA)7	21	50	70
c8993/f2p0/2233	1	p3	(CGC)5	15	770	784
c8995/f1p0/2012	1	p2	(CT)7	14	121	134
c8996/f1p2/2033	1	p2	(CT)7	14	49	62
c8997/f2p1/1904	1	p4	(TCTT)6	24	153	176
c8997/f2p1/1904	2	p3	(CGG)5	15	505	519
c9003/f1p2/2057	1	p3	(GCG)8	24	117	140
c9019/f1p0/1893	1	p1	(T)19	19	3	21
c9044/f1p0/1744	1	p1	(A)10	10	1571	1580
c9051/f1p2/1868	1	c	(A)14caaag(A)13	32	1754	1785
c9053/f1p0/1595	1	p1	(T)31	31	1440	1470
c9059/f1p0/1767	1	p3	(TCT)5	15	2	16
c9061/f1p0/2047	1	p1	(T)30	30	1	30
c9064/f1p0/1977	1	p3	(TGA)6	18	730	747
c9068/f1p0/2199	1	p1	(T)11	11	367	377
c9085/f1p0/1797	1	p1	(T)14	14	1663	1676
c9112/f1p0/1643	1	p1	(T)11	11	1259	1269
c9112/f1p0/1643	2	p1	(T)10	10	1439	1448
c9125/f1p0/1921	1	p2	(TC)7	14	33	46
c9126/f1p1/1828	1	c	(AAG)5aaagcagaaacaaaaata(T)10caaaaaaatttaag(A)10	67	15	81
c9127/f1p0/1831	1	c	(AT)9agagatat(AG)10	46	37	82
c9128/f1p2/2036	1	p1	(A)14	14	1783	1796
c9156/f1p3/1901	1	c	(T)10ctttttctttttacttctctccctccctttctaaacttctctctagaacattaacaattgattgagtgatgatgcgcataaagaaagat(GA)7	113	8	120
c9159/f1p2/1797	1	p3	(TAA)5	15	13	27
c9160/f2p0/2153	1	p1	(T)12	12	441	452
c9160/f2p0/2153	2	p3	(AAC)5	15	1468	1482
c9163/f4p0/2134	1	p1	(T)12	12	1985	1996
c9171/f2p0/1898	1	p3	(TAG)5	15	208	222
c9171/f2p0/1898	2	p1	(T)11	11	480	490
c9171/f2p0/1898	3	p1	(T)12	12	1648	1659
c9172/f1p4/1974	1	p2	(CT)14	28	31	58
c9184/f2p0/1970	1	p3	(GAT)7	21	790	810
c9205/f1p0/1702	1	p1	(C)27	27	664	690
c9205/f1p0/1702	2	p1	(T)14	14	1273	1286
c9205/f1p0/1702	3	p1	(A)10	10	1563	1572
c9212/f1p0/2091	1	p1	(A)10	10	1981	1990
c9233/f1p0/1935	1	p2	(AT)7	14	1907	1920
c9248/f1p0/1915	1	p3	(GCA)6	18	258	275
c9251/f1p0/1839	1	p1	(T)11	11	1683	1693
c9253/f1p0/2075	1	p3	(ACC)6	18	1259	1276
c9260/f1p1/1524	1	c	(CAC)5cataaccgccgcccgacttttccgttccaattgctggagaagaaagaggacgaagcatgctccagcagctcgtcctcctccgccact(ACC)6	120	40	159
c9260/f1p1/1524	2	p3	(CGG)5	15	1155	1169
c9260/f1p1/1524	3	p1	(T)14	14	1420	1433
c9276/f1p2/1845	1	p5	(TTTGT)5	25	948	972
c9285/f1p0/1758	1	p3	(GAA)5	15	21	35
c9291/f1p0/1692	1	p1	(T)11	11	1227	1237
c9321/f1p0/1788	1	p1	(T)10	10	1601	1610
c9324/f1p3/1848	1	p1	(T)21	21	1739	1759
c9344/f1p1/1859	1	p2	(AG)8	16	1	16
c9346/f1p0/2120	1	p1	(T)11	11	201	211
c9352/f2p1/2026	1	p2	(GA)6	12	1391	1402
c9361/f1p0/1749	1	p2	(AG)7	14	314	327
c9364/f1p0/2133	1	p4	(AAAT)5	20	1679	1698
c9364/f1p0/2133	2	p1	(T)17	17	1903	1919
c9371/f1p0/1832	1	c	(ACC)5gccatcaccgccttgtgactaagtaacagcatcatcaacacatatattactaccaatacaaatgcatacatagt(A)12	101	1296	1396
c9371/f1p0/1832	2	p1	(A)11	11	1545	1555
c9387/f1p1/1974	1	p3	(CTC)6	18	702	719
c9396/f1p0/1990	1	p1	(T)10	10	873	882
c9404/f1p1/1418	1	c	(GA)6tgccgagaggagagagatagaaccgcggagga(AG)6	56	2	57
c9410/f1p3/2323	1	p1	(A)10	10	2001	2010
c9410/f1p3/2323	2	p1	(T)10	10	2187	2196
c9425/f1p0/2087	1	p2	(TC)22	44	50	93
c9428/f1p0/2225	1	p1	(T)13	13	1115	1127
c9431/f1p0/1873	1	c	(AT)6(AG)6	24	1628	1651
c9433/f1p0/1882	1	p1	(A)28	28	95	122
c9447/f2p0/1635	1	p3	(AGA)5	15	958	972
c9452/f1p2/1946	1	c	(A)12gaaaaagaacagagtgaagtgaggagt(GA)10gggtgaaggagaagcactt(AAG)5	93	29	121
c9466/f1p1/2114	1	p1	(T)18	18	1953	1970
c9469/f2p1/2170	1	p2	(CT)16	32	45	76
c9481/f1p0/1941	1	p2	(AG)6	12	59	70
c9484/f1p0/1849	1	p1	(A)10	10	52	61
c9494/f1p0/1700	1	c	(CT)6ccccc(CT)7	31	17	47
c9494/f1p0/1700	2	p1	(C)10	10	1426	1435
c9494/f1p0/1700	3	p1	(T)27	27	1585	1611
c9507/f1p0/2137	1	p3	(AAG)5	15	645	659
c9507/f1p0/2137	2	p1	(T)11	11	1153	1163
c9507/f1p0/2137	3	p1	(A)10	10	1705	1714
c9516/f1p0/2060	1	p2	(AT)8	16	2033	2048
c9519/f1p0/1649	1	p2	(CT)10	20	21	40
c9524/f1p0/1761	1	p1	(T)23	23	1329	1351
c9532/f1p1/1683	1	p2	(TC)10	20	44	63
c9555/f1p0/1764	1	p3	(CCG)5	15	74	88
c9563/f1p1/1951	1	p3	(AAG)7	21	825	845
c9567/f1p0/1574	1	p1	(T)13	13	1453	1465
c9568/f1p0/1878	1	p4	(AATA)5	20	34	53
c9570/f1p1/1599	1	p3	(AGT)6	18	775	792
c9578/f1p0/2119	1	p2	(TC)8	16	1036	1051
c9578/f1p0/2119	2	p2	(AG)10	20	1971	1990
c9579/f4p3/2066	1	p2	(TC)9	18	25	42
c9579/f4p3/2066	2	p1	(T)11	11	1951	1961
c9594/f1p2/1727	1	p2	(AG)8	16	98	113
c9598/f1p0/2240	1	p3	(GCT)7	21	1528	1548
c9599/f1p0/1825	1	p2	(CT)7	14	13	26
c9602/f1p0/1926	1	p1	(T)14	14	137	150
c9607/f1p0/1550	1	p2	(TC)6	12	49	60
c9612/f2p0/1565	1	p2	(CT)7	14	1	14
c9621/f1p1/2311	1	p3	(GAG)5	15	707	721
c9635/f1p0/1851	1	p1	(T)11	11	1362	1372
c9666/f1p0/2123	1	p4	(TTTG)5	20	1880	1899
c9676/f1p5/2044	1	p2	(AG)6	12	68	79
c9676/f1p5/2044	2	p2	(TC)6	12	1521	1532
c9677/f1p0/1929	1	p1	(T)12	12	258	269
c9681/f1p1/1662	1	p3	(CAG)5	15	438	452
c9681/f1p1/1662	2	p1	(T)11	11	1625	1635
c9685/f1p0/1743	1	p3	(GAA)5	15	45	59
c9685/f1p0/1743	2	p3	(GAA)7	21	1533	1553
c9691/f1p1/2198	1	p3	(CAG)5	15	151	165
c9694/f1p0/1624	1	p1	(T)11	11	1572	1582
c9695/f1p0/2139	1	p4	(GATT)5	20	1040	1059
c9695/f1p0/2139	2	p1	(T)21	21	1828	1848
c9695/f1p0/2139	3	p1	(A)11	11	1951	1961
c9705/f1p0/1935	1	p1	(T)23	23	3	25
c9705/f1p0/1935	2	p2	(AT)6	12	1538	1549
c9705/f1p0/1935	3	p1	(T)11	11	1894	1904
c9713/f1p2/1599	1	p1	(T)11	11	1436	1446
c9714/f1p4/1950	1	p3	(ACT)5	15	1773	1787
c9718/f1p1/2065	1	p1	(A)15	15	30	44
c9719/f1p1/1723	1	p2	(AG)8	16	21	36
c9719/f1p1/1723	2	p1	(T)10	10	259	268
c9726/f1p0/2229	1	p1	(T)10	10	1133	1142
c9727/f1p0/2176	1	p1	(T)15	15	49	63
c9729/f1p2/2157	1	p3	(GAG)5	15	308	322
c9735/f1p0/1983	1	p2	(TC)12	24	112	135
c9750/f1p0/1734	1	p1	(T)12	12	383	394
c9753/f2p0/2079	1	c	(GAA)5accagaggaggaggtccaccgtcgcac(AAG)5	57	119	175
c9753/f2p0/2079	2	c	(CAA)5cc(GCA)5	32	405	436
c9754/f1p0/1823	1	c	(TGT)5t(TA)10	36	471	506
c9754/f1p0/1823	2	p1	(T)12	12	625	636
c9754/f1p0/1823	3	p1	(T)14	14	1628	1641
c9756/f1p2/1969	1	c	(TCT)5tcaatcctctctttcttgttcttacaacaagattcaatgctgcctgcctagctctggat(GA)6aagggcagtattgagtgaaaaaagataaggtgaattttatccaatttctgtgtctgacccacttcttcttttcttctgatcctctc(CTT)5	187	131	317
c9760/f1p0/1782	1	c	(GCA)5gcctccgccgcagtaccaacagccacctcagcagtggatgat(GCA)5	72	152	223
c9760/f1p0/1782	2	p3	(GGT)7	21	1391	1411
c9760/f1p0/1782	3	p1	(T)13	13	1682	1694
c9761/f1p1/1882	1	c	(A)10tctctatattttctcttccgatctctgcttctttctggtctcccaggttcatacgtttcccttctctctccgtgtaaatac(AT)7	105	15	119
c9781/f1p0/1512	1	p1	(T)19	19	72	90
c9784/f1p0/1791	1	p2	(CT)9	18	23	40
c9784/f1p0/1791	2	p2	(TC)6	12	1007	1018
c9784/f1p0/1791	3	p1	(A)18	18	1631	1648
c9785/f1p0/1812	1	p3	(AGT)6	18	125	142
c9785/f1p0/1812	2	p3	(TCT)19	57	389	445
c9785/f1p0/1812	3	p3	(TGA)11	33	895	927
c9793/f1p7/1868	1	p1	(T)12	12	1792	1803
c9804/f1p1/2193	1	p1	(T)22	22	1	22
c9806/f1p0/1813	1	p4	(TTGT)5	20	143	162
c9806/f1p0/1813	2	p2	(TA)10	20	1675	1694
c9811/f1p0/1563	1	p3	(AAC)7	21	743	763
c9819/f1p2/2101	1	p2	(TA)6	12	44	55
c9823/f2p0/1788	1	p1	(A)10	10	1644	1653
c9827/f1p0/2086	1	p2	(GA)6	12	248	259
c9827/f1p0/2086	2	p2	(TC)9	18	586	603
c9828/f1p0/1809	1	p3	(CCG)5	15	41	55
c9849/f1p0/1791	1	p1	(T)11	11	124	134
c9859/f1p0/1883	1	p1	(T)12	12	942	953
c9860/f1p0/2294	1	p2	(TC)22	44	231	274
c9860/f1p0/2294	2	c	(T)10ctttttgtttttagcattttcacattatcttatacagtgttagaggagtaaaggtttaattttaa(T)10	85	537	621
c9860/f1p0/2294	3	c	(CA)7taacatatctgagtataaaatgctctaaagggaagaaagaagcttagagtg(T)12ataatgataactgatgcttcaaaaataggcacagaaaatttgttaagatatgctcccactttggtattcttatg(T)12	163	1088	1250
c9866/f1p0/1880	1	p1	(A)10	10	1730	1739
c9884/f1p5/2306	1	p3	(TCT)5	15	33	47
c9884/f1p5/2306	2	p2	(TC)10	20	256	275
c9886/f1p1/2073	1	c	(CTT)5catcttcatt(ATC)5g(TCT)6	59	103	161
c9886/f1p1/2073	2	p1	(A)11	11	1753	1763
c9890/f1p1/1875	1	p1	(A)12	12	1590	1601
c9899/f3p0/1978	1	p1	(T)13	13	25	37
c9903/f3p0/1988	1	p1	(T)10	10	1976	1985
c9906/f1p0/2001	1	p1	(T)11	11	125	135
c9912/f3p5/1481	1	p2	(AG)9	18	22	39
c9921/f1p0/1603	1	p2	(AG)6	12	89	100
c9929/f1p1/1818	1	p1	(T)13	13	1738	1750
c9936/f1p2/2026	1	p1	(T)14	14	232	245
c9937/f2p0/2059	1	p1	(A)12	12	23	34
c9937/f2p0/2059	2	p1	(T)11	11	1835	1845
c9957/f1p0/1738	1	p1	(T)10	10	1593	1602
c9960/f1p1/1761	1	c	(TTTA)5(T)13	33	1083	1115
c9965/f2p0/2012	1	p2	(AG)7	14	143	156
c9986/f1p0/1937	1	p2	(AG)7	14	1850	1863
c9991/f1p1/2119	1	p2	(CT)11	22	85	106
c9992/f1p0/1841	1	c	(T)10gttctaattattatgcgcttgatatcgtgatattaaattatatgcgtttattttc(A)13	78	240	317
c9992/f1p0/1841	2	p1	(T)19	19	772	790
c9995/f2p0/2117	1	p1	(A)13	13	2045	2057
c10016/f1p0/1745	1	p1	(A)10	10	1719	1728
c10027/f1p0/1936	1	p1	(T)10	10	471	480
c10029/f1p0/1601	1	c	(T)18gttctctttgtacttacaaaaatggattctcaagattcccaactccccctgcc(CCA)8	95	62	156
c10029/f1p0/1601	2	p3	(CAC)5	15	320	334
c10046/f1p3/1991	1	c	(T)10ctttttcttttttacttctctcctcccttctaaacttctctctagaacattaacaattgattgagtgatgatgcgcataaagaaagat(GA)7	112	14	125
c10065/f1p0/1943	1	p1	(T)10	10	352	361
c10065/f1p0/1943	2	p3	(TAT)6	18	989	1006
c10078/f1p5/2091	1	p3	(GAC)5	15	50	64
c10084/f1p0/1688	1	c	(GAG)5ccaccacccatcccattggctttatcatcctctcaactgaa(TCT)5	71	27	97
c10086/f2p0/1752	1	p3	(ACC)5	15	145	159
c10110/f3p0/1706	1	p1	(A)14	14	1278	1291
c10122/f1p1/1936	1	p2	(AG)12	24	2	25
c10127/f1p1/1846	1	p3	(GCG)6	18	73	90
c10129/f1p0/1648	1	p2	(AG)13	26	55	80
c10138/f1p0/2196	1	p2	(AG)12	24	34	57
c10138/f1p0/2196	2	p2	(AG)6	12	2117	2128
c10150/f1p0/1901	1	p2	(CT)11	22	55	76
c10163/f1p0/1947	1	p2	(CT)7	14	148	161
c10165/f1p0/2050	1	c	(T)10c(T)16	27	2	28
c10165/f1p0/2050	2	p1	(A)10	10	1121	1130
c10171/f1p0/1595	1	p3	(ATT)6	18	7	24
c10195/f2p2/1798	1	p2	(CA)6	12	80	91
c10195/f2p2/1798	2	p3	(AGC)6	18	1496	1513
c10201/f1p0/1825	1	p1	(A)17	17	1689	1705
c10205/f2p2/2199	1	c	(AG)8ctgagatcgagtggtagagaatcaagaatcggatcgagagtttaggggaggaataggaataggaacgacgc(A)10	97	29	125
c10227/f1p0/1925	1	p3	(CGG)7	21	319	339
c10228/f4p1/2216	1	p1	(T)19	19	2163	2181
c10235/f1p0/2323	1	p3	(AAG)5	15	2268	2282
c10238/f1p0/1866	1	p1	(A)10	10	89	98
c10241/f4p1/2169	1	p1	(A)10	10	164	173
c10241/f4p1/2169	2	p3	(TGC)5	15	1970	1984
c10276/f1p1/2000	1	c	(T)10ctttttttttatcacatctggagcagttctttctctcctgttaaatattgctgcagcaacctgttcatttttccacttttatctc(T)15	110	5	114
c10276/f1p1/2000	2	p1	(T)10	10	1890	1899
c10282/f1p1/1860	1	p2	(CT)6	12	36	47
c10282/f1p1/1860	2	p3	(ATA)5	15	1833	1847
c10286/f2p0/1599	1	c	(TCA)5agaagcttcagcaaacattagtagttctcctttcatggctgcccctccccctccccccacccccttcttcacccctccccctctcccatt(TTC)7	126	300	425
c10292/f1p0/1753	1	p1	(A)10	10	1420	1429
c10298/f1p0/2019	1	p1	(A)10	10	106	115
c10304/f1p0/2116	1	p3	(TTA)5	15	1567	1581
c10304/f1p0/2116	2	p1	(T)11	11	1797	1807
c10321/f1p0/1731	1	p3	(CCT)10	30	1551	1580
c10329/f1p0/1849	1	p2	(TC)6	12	48	59
c10329/f1p0/1849	2	p2	(GA)7	14	1394	1407
c10342/f1p1/1905	1	p2	(GA)7	14	1135	1148
c10342/f1p1/1905	2	p1	(C)13	13	1882	1894
c10354/f1p0/1598	1	p2	(TC)7	14	37	50
c10372/f1p1/2292	1	c	(AG)6tgtgtt(TG)6tagaatacttgaaaaacag(AGA)5	64	529	592
c10416/f1p1/2204	1	p3	(CCG)5	15	422	436
c10418/f1p1/2023	1	p2	(AT)6	12	2002	2013
c10421/f3p1/2390	1	p1	(T)12	12	2303	2314
c10437/f1p0/1995	1	p2	(GA)8	16	1709	1724
c10437/f1p0/1995	2	p1	(T)10	10	1906	1915
c10438/f1p0/1575	1	p1	(A)15	15	489	503
c10438/f1p0/1575	2	p1	(T)15	15	1426	1440
c10450/f1p0/2433	1	p2	(AT)6	12	2371	2382
c10457/f1p0/2045	1	p1	(T)27	27	1	27
c10458/f1p0/1691	1	c	(GA)6ggagagagaaggaaataggttgttgcgaaagaacttggtttttggaagaaaagtgggtccact(A)17	92	461	552
c10458/f1p0/1691	2	p1	(A)18	18	683	700
c10460/f1p0/2009	1	p1	(T)10	10	150	159
c10460/f1p0/2009	2	p1	(A)11	11	976	986
c10460/f1p0/2009	3	p1	(A)10	10	1187	1196
c10463/f1p0/2246	1	p1	(C)12	12	24	35
c10468/f1p0/1705	1	p1	(T)12	12	890	901
c10473/f1p0/1447	1	p2	(GA)7	14	85	98
c10475/f3p2/1818	1	p4	(ATCA)5	20	102	121
c10476/f1p2/2323	1	p1	(A)10	10	2228	2237
c10495/f1p1/1811	1	c	(GA)6(GT)7	26	182	207
c10496/f1p0/2145	1	p2	(AG)8	16	106	121
c10519/f1p0/2191	1	c	(TTC)8aagaacactctcgcccgctctgattcggcgatttgtctactctgctcttcgctgttcttccatctatctctcttcga(CT)7	115	76	190
c10528/f1p0/1701	1	p1	(T)22	22	1613	1634
c10538/f1p0/2105	1	p1	(A)10	10	363	372
c10582/f1p4/1834	1	p3	(TAT)5	15	1625	1639
c10594/f4p0/1731	1	p1	(T)24	24	1667	1690
c10642/f2p0/1761	1	p1	(A)12	12	1551	1562
c10673/f1p2/2215	1	p2	(TC)9	18	13	30
c10707/f1p0/2124	1	c	(CAC)7catcatcat(CAC)7catcaccaccac(CAT)6	81	1143	1223
c10715/f1p1/1828	1	p1	(T)10	10	1764	1773
c10717/f1p0/1929	1	p2	(CT)12	24	91	114
c10717/f1p0/1929	2	c	(GA)7agagagagcccacaagaatttaataaggttttgtcgctgtttctatctttaatat(A)10	79	226	304
c10717/f1p0/1929	3	c	(CAC)5cataaccgccgcccgacttttccgttccaattgctggagaagaaagaggacgaagcatgctccagcagctcgtcctcctccgccact(ACC)6	120	454	573
c10717/f1p0/1929	4	c	(CGC)6ggctttgtatagaggcacgatgtctagtgggttgcattttatgaattttcccacgccggtggcgctgctgccaagtcagcaactcggcgccaatatt(GGC)5	130	1378	1507
c10717/f1p0/1929	5	p1	(T)16	16	1830	1845
c10720/f1p0/1714	1	p1	(T)10	10	265	274
c10720/f1p0/1714	2	p3	(AGC)8	24	1346	1369
c10731/f1p1/1660	1	p1	(T)16	16	11	26
c10731/f1p1/1660	2	p3	(ACC)5	15	974	988
c10731/f1p1/1660	3	p3	(CCA)6	18	1151	1168
c10736/f1p0/1568	1	p2	(CT)6	12	15	26
c10736/f1p0/1568	2	p1	(A)11	11	1361	1371
c10742/f1p0/1637	1	p1	(T)13	13	1625	1637
c10748/f1p0/1803	1	p3	(CGC)5	15	1573	1587
c10761/f1p6/2065	1	p1	(A)10	10	1611	1620
c10767/f1p4/1666	1	p3	(AAT)5	15	771	785
c10771/f1p0/1775	1	c	(AG)6a(AG)7	27	1453	1479
c10771/f1p0/1775	2	p1	(T)11	11	1709	1719
c10777/f1p0/2228	1	p3	(CAG)6	18	17	34
c10788/f1p0/2351	1	p2	(TC)6	12	783	794
c10788/f1p0/2351	2	p3	(TAT)5	15	1081	1095
c10794/f1p1/1856	1	p3	(GAA)6	18	279	296
c10795/f1p0/2030	1	p1	(T)14	14	717	730
c10803/f1p3/1493	1	p3	(TAT)5	15	1317	1331
c10816/f1p0/2206	1	c	(T)12ctt(TTC)5	30	1077	1106
c10817/f1p0/1737	1	p3	(CAT)6	18	15	32
c10821/f1p0/2074	1	p1	(C)11	11	2064	2074
c10837/f1p0/1654	1	p1	(A)17	17	46	62
c10847/f1p0/1988	1	p1	(T)11	11	1915	1925
c10868/f1p2/2012	1	p3	(GGA)8	24	196	219
c10868/f1p2/2012	2	p3	(TCT)6	18	1558	1575
c10880/f1p1/2202	1	p1	(A)17	17	30	46
c10884/f1p0/1877	1	c	(TG)7tatacatataata(TG)7tttattcatgtggcgatagt(TTA)5	76	1218	1293
c10887/f1p0/2335	1	c*	(AG)8(AGA)5*	29	45	73
c10898/f1p0/1642	1	p3	(TCT)7	21	111	131
c10903/f1p1/1933	1	p1	(T)14	14	1887	1900
c10908/f1p0/1724	1	p2	(TG)6	12	746	757
c10910/f1p0/1716	1	p1	(A)14	14	235	248
c10910/f1p0/1716	2	p3	(CTG)5	15	620	634
c10912/f1p1/2085	1	p2	(GA)8	16	162	177
c10921/f1p0/1648	1	p1	(T)15	15	1473	1487
c10922/f1p0/1594	1	p1	(A)10	10	625	634
c10926/f2p0/1620	1	p2	(CT)9	18	312	329
c10930/f1p0/2173	1	p1	(A)28	28	1587	1614
c10941/f2p1/1486	1	p2	(GA)9	18	44	61
c10954/f1p0/2184	1	p3	(TCT)5	15	22	36
c10954/f1p0/2184	2	p1	(T)13	13	2151	2163
c10960/f1p0/1813	1	p2	(TA)7	14	132	145
c10960/f1p0/1813	2	p3	(AGG)5	15	1428	1442
c10960/f1p0/1813	3	p1	(A)11	11	1780	1790
c10963/f1p2/1650	1	p3	(CTC)5	15	54	68
c10968/f1p0/2236	1	p3	(GAA)5	15	23	37
c10972/f1p0/1778	1	p3	(GGT)5	15	1026	1040
c10975/f1p0/2114	1	p1	(T)10	10	1576	1585
c10975/f1p0/2114	2	p1	(T)10	10	1887	1896
c10979/f1p0/2121	1	p1	(T)12	12	180	191
c10982/f1p0/1760	1	p3	(GTA)6	18	381	398
c10986/f1p1/2023	1	c	(GAA)6ctccc(CGG)6	41	492	532
c10987/f1p1/1560	1	p2	(AT)12	24	1462	1485
c10988/f1p0/1657	1	p3	(CAT)5	15	1332	1346
c10991/f1p0/1624	1	p1	(T)17	17	1448	1464
c11001/f1p0/2155	1	p1	(T)10	10	10	19
c11015/f1p1/2180	1	c	(T)15c(T)12	28	1082	1109
c11018/f1p3/1755	1	c	(TC)6agtctctctttttcagaaggtcgctgctcggagcttgg(AGA)5	65	19	83
c11020/f1p1/1604	1	p1	(T)10	10	1514	1523
c11023/f1p1/2054	1	p1	(T)13	13	461	473
c11041/f1p0/2375	1	p1	(A)10	10	2265	2274
c11046/f1p0/1875	1	p2	(CT)9	18	105	122
c11048/f1p0/2298	1	p2	(TA)6	12	1642	1653
c11049/f1p2/1656	1	p1	(T)11	11	1544	1554
c11063/f1p0/1717	1	p1	(T)11	11	1662	1672
c11068/f1p0/2126	1	p2	(AG)6	12	2050	2061
c11071/f1p2/2135	1	p1	(T)19	19	2	20
c11078/f1p0/1869	1	p1	(T)15	15	306	320
c11078/f1p0/1869	2	p2	(GA)6	12	1764	1775
c11095/f1p0/1898	1	p3	(TCT)5	15	498	512
c11095/f1p0/1898	2	p3	(TCC)7	21	1190	1210
c11095/f1p0/1898	3	p3	(TTA)7	21	1699	1719
c11096/f1p0/1826	1	p5	(AATTA)5	25	181	205
c11096/f1p0/1826	2	p2	(TG)6	12	318	329
c11098/f1p0/2088	1	p2	(TA)8	16	632	647
c11098/f1p0/2088	2	p1	(T)12	12	934	945
c11106/f1p0/1943	1	p1	(T)10	10	1880	1889
c11120/f2p1/1753	1	p3	(AAT)6	18	868	885
c11123/f1p1/2098	1	p3	(GGA)5	15	510	524
c11123/f1p1/2098	2	p1	(T)10	10	2007	2016
c11131/f1p2/2034	1	p3	(CCG)5	15	710	724
c11139/f2p0/1974	1	p1	(T)13	13	49	61
c11147/f1p0/1769	1	p3	(CAA)5	15	585	599
c11147/f1p0/1769	2	c	(CGC)5attcatgcccatggccgcctggtgggagaactccctcgatcgcatgc(CCG)6	80	1392	1471
c11148/f1p0/1781	1	p5	(GTTTT)8	40	1623	1662
c11151/f1p3/1764	1	p2	(CT)8	16	32	47
c11151/f1p3/1764	2	p1	(T)15	15	168	182
c11151/f1p3/1764	3	p1	(T)14	14	1743	1756
c11152/f2p0/1361	1	p2	(CT)17	34	50	83
c11155/f3p1/1817	1	p2	(GA)9	18	278	295
c11158/f5p3/2533	1	c	(GA)7aagagtaggcgagaggaggagagag(GA)8	55	83	137
c11164/f1p0/2299	1	p2	(AT)6	12	1357	1368
c11173/f1p0/2119	1	p1	(A)13	13	1428	1440
c11178/f1p0/1361	1	p2	(CT)7	14	16	29
c11193/f1p3/1938	1	p1	(T)16	16	1792	1807
c11205/f1p0/1647	1	p2	(AG)6	12	29	40
c11213/f1p0/1492	1	p2	(TA)8	16	1388	1403
c11214/f1p1/1850	1	c	(T)11ggtaatcatcaattccagg(T)10	40	1100	1139
c11216/f1p4/1778	1	p2	(TC)6	12	36	47
c11224/f1p1/1763	1	p3	(TGA)6	18	384	401
c11230/f1p0/1680	1	c	(AT)7(AG)6attgtttgttgtttacaatataataaaaatagaatagaaaaggcatcatatccagcgc(CA)6	96	17	112
c11230/f1p0/1680	2	p4	(AATT)5	20	836	855
c11238/f1p0/2093	1	p2	(TA)6	12	57	68
c11239/f1p0/1782	1	p3	(GCG)5	15	195	209
c11240/f1p0/1677	1	p1	(T)16	16	1608	1623
c11241/f1p0/2285	1	p2	(AG)8	16	119	134
c11251/f1p2/2243	1	p1	(T)11	11	2168	2178
c11254/f1p0/1922	1	p2	(TA)6	12	586	597
c11259/f2p0/2107	1	p3	(CTT)5	15	1492	1506
c11259/f2p0/2107	2	p1	(T)18	18	1958	1975
c11273/f1p0/2032	1	p3	(TCT)6	18	172	189
c11277/f2p0/1702	1	p1	(A)10	10	1082	1091
c11282/f1p0/1784	1	p1	(G)11	11	205	215
c11290/f1p0/1877	1	p2	(TA)8	16	613	628
c11292/f1p0/2019	1	p2	(AT)6	12	1856	1867
c11296/f1p0/1700	1	p3	(AGC)5	15	584	598
c11307/f1p0/1627	1	p3	(GAA)6	18	1446	1463
c11310/f1p0/1838	1	c	(A)14ggtaaccggcaacttcagtcaaattggtcagactgttgacttgataactacaaaattacatgttttc(A)14	95	1559	1653
c11316/f1p0/1911	1	p3	(CTC)6	18	302	319
c11321/f3p0/1830	1	p1	(T)18	18	27	44
c11328/f1p1/1952	1	p1	(T)13	13	1439	1451
c11331/f1p0/2067	1	p3	(TCT)7	21	172	192
c11332/f1p0/2021	1	p2	(TC)8	16	10	25
c11332/f1p0/2021	2	p3	(GCC)6	18	333	350
c11332/f1p0/2021	3	p3	(AAT)6	18	1065	1082
c11332/f1p0/2021	4	p1	(T)15	15	1865	1879
c11347/f1p0/1926	1	p1	(T)17	17	3	19
c11352/f1p0/1755	1	p4	(ATTT)5	20	338	357
c11356/f1p1/2022	1	p1	(T)11	11	1958	1968
c11367/f1p0/2210	1	p1	(T)15	15	964	978
c11368/f1p0/1768	1	p2	(AG)6	12	115	126
c11374/f1p0/2085	1	p3	(GAT)5	15	847	861
c11374/f1p0/2085	2	p1	(T)13	13	1028	1040
c11379/f1p0/2143	1	p1	(A)10	10	29	38
c11379/f1p0/2143	2	p3	(GGA)6	18	1089	1106
c11398/f1p2/1619	1	p1	(T)13	13	1219	1231
c11402/f2p1/1989	1	p1	(A)10	10	27	36
c11412/f1p2/1744	1	p1	(T)11	11	1559	1569
c11418/f2p0/1752	1	c	(T)13gttctctttgtacttacaaaaatggattctcaagattcccaactccccctgcc(CCA)5	81	220	300
c11429/f1p1/1799	1	p1	(T)10	10	95	104
c11435/f1p0/2130	1	p1	(T)10	10	512	521
c11439/f1p1/1865	1	p2	(AT)6	12	1766	1777
c11441/f1p4/1638	1	p2	(TC)12	24	65	88
c11441/f1p4/1638	2	p4	(TGCC)6	24	1313	1336
c11447/f1p0/1755	1	p2	(AG)9	18	10	27
c11447/f1p0/1755	2	c	(AC)6ccgtacatataatatatatgc(AT)10	53	156	208
c11447/f1p0/1755	3	p2	(CT)6	12	319	330
c11455/f1p0/1672	1	p1	(T)22	22	343	364
c11455/f1p0/1672	2	c	(CAT)9ctccat(CAA)5aaccctagcaagatccatgaga(ATC)5	85	820	904
c11455/f1p0/1672	3	c	(T)12gggaaggggaattttttttcttttc(T)10cactgttttcatctttaatggtgggtgacttgtttggatttcttggaag(A)14	110	1489	1598
c11457/f1p0/1951	1	p2	(AT)10	20	1813	1832
c11471/f1p0/2142	1	p3	(TTG)6	18	352	369
c11476/f1p0/1296	1	p2	(TA)6	12	1128	1139
c11488/f1p0/1706	1	p1	(T)16	16	793	808
c11491/f1p2/1680	1	c	(T)16ggctttggctgttgcat(GACA)9	69	1545	1613
c11501/f1p0/2216	1	p1	(A)16	16	1272	1287
c11501/f1p0/2216	2	p1	(T)14	14	2131	2144
c11506/f2p0/1056	1	p3	(GCG)6	18	636	653
c11509/f1p0/1951	1	p3	(TGA)5	15	1810	1824
c11519/f1p1/1916	1	p3	(GAT)6	18	97	114
c11558/f1p0/2061	1	p1	(T)25	25	1	25
c11564/f1p0/1908	1	p2	(AG)7	14	30	43
c11576/f1p0/1922	1	p2	(GA)6	12	27	38
[truncated: 20,779 more rows]
