# Supplementary material for: Single-molecule real-time sequencing identifies massive full-length cDNAs and alternative-splicing events that facilitate comparative and functional genomics study in the hexaploid crop sweet potato
Source: PeerJ. 2019 Nov 15;7:e7933. doi: 10.7717/peerj.7933 (PMC6859871; doi:10.7717/peerj.7933)
Supplement: File S8 [file peerj-07-7933-s008.xlsx]

## Sheet: details
Additional file 8. Information of transcription factors identified from It51184
Family Name	Member ID	It51184.ID
ARF	1	c55530/f2p0/3194
ARF	2	c30114/f2p5/3263
ARF	3	c29395/f3p4/3058
ARF	4	c30124/f1p2/3044
ARF	5	c37291/f1p3/2606
ARF	6	c36451/f2p1/3076
ARF	7	c55142/f2p4/2720
ARF	8	c51866/f1p4/4105
ARF	9	c6553/f1p0/2228
ARF	10	c50919/f1p1/5263.1.2
ARF	11	c36883/f1p0/2435
ARF	12	c50483/f1p0/3906
ARF	13	c25199/f1p0/2638
ARF	14	c60816/f1p0/4588.2
ARF	15	c30702/f1p1/2508
ARF	16	c49970/f2p4/4468
ARF	17	c48951/f1p1/2813
ARF	18	c31903/f1p3/2574
ARF	19	c45847/f1p1/2854
ARF	20	c31482/f2p1/2900
ARF	21	c56572/f1p3/4046
ARF	22	c52952/f1p2/2961
ARR-B	1	c4363/f1p0/1976
ARR-B	2	c24392/f2p0/2655
ARR-B	3	c46869/f3p1/2858
ARR-B	4	c27516/f2p1/2478
ARR-B	5	c44772/f1p0/3149.2
ARR-B	6	c27815/f1p1/2610
ARR-B	7	c41965/f1p0/3035.1
ARR-B	8	c45969/f1p1/2651
ARR-B	9	c27122/f1p0/2681
ARR-B	10	c55912/f1p2/2816
ARR-B	11	c21283/f1p0/2121
ARR-B	12	c28922/f1p0/2575
ARR-B	13	c4580/f2p1/2075
ARR-B	14	c49062/f1p0/2928
B3	1	c16002/f1p0/2116
B3	2	c39202/f1p0/2632
B3	3	c24800/f1p0/1803
B3	4	c15292/f1p0/1626
B3	5	c14901/f1p2/1716
B3	6	c3954/f1p2/1899
B3	7	c14297/f2p1/1760
B3	8	c11176/f1p0/1548
B3	9	c10240/f1p0/2129
B3	10	c9197/f1p0/2004
B3	11	c2508/f3p0/1772
B3	12	c23888/f2p3/3240
B3	13	c36139/f3p3/3051
B3	14	c60756/f1p0/3814
B3	15	c25817/f1p0/2964.1
B3	16	c49005/f1p0/5097
B3	17	c46146/f1p5/3022
B3	18	c59005/f1p5/3766
B3	19	c33605/f1p0/2615
B3	20	c39388/f1p2/2904
B3	21	c39296/f1p3/3364
B3	22	c29012/f7p1/3115
B3	23	c24315/f2p10/3097
B3	24	c36668/f2p0/2994
B3	25	c23126/f18p14/2910
B3	26	c24860/f1p0/2966.1
B3	27	c30512/f2p1/3286
B3	28	c37187/f1p2/2982
B3	29	c60536/f4p2/3069
B3	30	c25538/f3p0/2892
B3	31	c23309/f15p20/3174
B3	32	c42511/f2p10/2897
B3	33	c34334/f4p0/2854
B3	34	c51436/f1p1/4412
B3	35	c18653/f1p0/1594
B3	36	c54913/f1p0/3146
B3	37	c58891/f1p0/2699
B3	38	c33384/f1p0/3223
B3	39	c43446/f1p1/3272
B3	40	c37121/f1p0/2709
B3	41	c41623/f1p0/3340.1
B3	42	c52223/f1p0/3099.1
B3	43	c47427/f7p10/3322
B3	44	c61460/f1p0/4186
B3	45	c27515/f1p1/2711
B3	46	c27074/f1p0/2696
B3	47	c56593/f1p4/4338
B3	48	c55582/f1p1/3013.1
B3	49	c52262/f1p0/2915
B3	50	c43922/f1p0/2944
B3	51	c55901/f1p0/3690.2
B3	52	c43903/f1p2/5228
B3	53	c62070/f1p6/4394
B3	54	c46298/f1p1/2968
B3	55	c29627/f1p0/1926.1
B3	56	c3257/f1p3/1823
B3	57	c36567/f2p0/2816
B3	58	c16382/f1p0/1807
B3	59	c49712/f1p0/3045.1
B3	60	c57372/f1p0/2945
B3	61	c21525/f1p3/1900
B3	62	c61532/f1p8/4356
B3	63	c26439/f1p0/3019
B3	64	c5915/f1p1/1557
B3	65	c49940/f1p0/2706
B3	66	c19551/f1p1/2038
B3	67	c57838/f1p0/2868
B3	68	c32229/f1p0/1457.2
B3	69	c32781/f1p0/1749
B3	70	c51878/f1p1/2661
B3	71	c58780/f3p6/4448
B3	72	c49108/f1p1/2676
B3	73	c50052/f1p0/3438
B3	74	c39202/f1p0/2632
B3	75	c57567/f1p1/3444
B3	76	c50161/f1p0/2650
B3	77	c29395/f3p4/3058
B3	78	c20130/f1p0/1849
B3	79	c39025/f1p1/2882
B3	80	c60816/f1p0/4588.2
B3	81	c36841/f1p0/2543
B3	82	c41465/f1p0/4890.3
B3	83	c43507/f1p0/3077
BBR-BPR	1	c12132/f1p0/1790
BBR-BPR	2	c21247/f1p2/1788
BBR-BPR	3	c15117/f1p0/1237
BBR-BPR	4	c14675/f1p0/1573
BBR-BPR	5	c14789/f1p0/1346
BBR-BPR	6	c58621/f1p0/3815.1
BBR-BPR	7	c26029/f1p1/2651
BBR-BPR	8	c45308/f1p1/2959.1
BBR-BPR	9	c14244/f1p0/1647
BBR-BPR	10	c29926/f1p0/1826
BBR-BPR	11	c8869/f5p2/1744
BBR-BPR	12	c31330/f1p1/1464
BBR-BPR	13	c31330/f1p1/1464
BBR-BPR	14	c14244/f1p0/1647
BBR-BPR	15	c29926/f1p0/1826
C2H2	1	c55400/f1p0/798
C2H2	2	c45162/f1p0/2601.1
C2H2	3	c33536/f3p0/1024
C2H2	4	c18309/f1p0/1780
C2H2	5	c17275/f1p0/1749
C2H2	6	c10688/f1p1/2112
C2H2	7	c30954/f1p1/2161
C2H2	8	c17039/f1p0/1629
C2H2	9	c6618/f1p0/1877
C2H2	10	c6478/f1p1/2018
C2H2	11	c10363/f1p0/4195.3
C2H2	12	c16106/f1p0/2092
C2H2	13	c22108/f1p0/1513
C2H2	14	c8621/f3p0/1825
C2H2	15	c42638/f1p1/2569.1
C2H2	16	c31254/f1p1/1794
C2H2	17	c9209/f1p1/2022
C2H2	18	c20478/f2p1/1999
C2H2	19	c16344/f1p1/1891
C2H2	20	c19120/f2p0/2331
C2H2	21	c9137/f1p0/1377
C2H2	22	c28673/f1p0/3499.1
C2H2	23	c16520/f1p0/2102
C2H2	24	c19098/f1p0/2275
C2H2	25	c44826/f1p0/2650
C2H2	26	c44197/f1p0/2877
C2H2	27	c33735/f1p0/2905.1
C2H2	28	c19875/f1p0/1611
C2H2	29	c52133/f1p0/3102
C2H2	30	c52329/f1p0/2662
C2H2	31	c48983/f1p0/2507
C2H2	32	c11779/f1p1/1711
C2H2	33	c18937/f1p1/1843
C2H2	34	c13871/f2p1/2007
C2H2	35	c24192/f3p0/3156
C2H2	36	c21346/f1p0/1852
C2H2	37	c49127/f1p0/2719
C2H2	38	c20664/f1p1/2211
C2H2	39	c46054/f2p0/2891
C2H2	40	c8491/f1p1/1789
C2H2	41	c45991/f1p0/2812
C2H2	42	c15373/f1p0/1493
C2H2	43	c54339/f1p0/1150
C2H2	44	c28347/f1p2/2931
C2H2	45	c29612/f1p1/2817
C2H2	46	c45991/f1p0/2812
C2H2	47	c18127/f1p0/1508.1
C2H2	48	c24756/f2p2/2723
C2H2	49	c20192/f1p0/11375.4
C2H2	50	c3565/f3p0/1692
C2H2	51	c19287/f1p0/1675
C2H2	52	c21940/f1p0/1713
C2H2	53	c6377/f1p0/1396
C2H2	54	c9740/f3p2/1507
C2H2	55	c1790/f2p0/1612
C2H2	56	c21940/f1p0/1713
C2H2	57	c20069/f1p0/2071
C2H2	58	c1790/f2p0/1612
C2H2	59	c46302/f1p0/2829.1
C2H2	60	c47953/f5p4/4244
C2H2	61	c50505/f1p4/4133
C2H2	62	c17107/f1p0/1769
C2H2	63	c8188/f1p0/1691
C2H2	64	c56366/f1p0/2507
C2H2	65	c17491/f1p0/1949
C2H2	66	c36811/f2p1/2876
C3H	1	c18213/f1p0/1594
C3H	2	c31310/f1p2/1754
C3H	3	c2678/f2p0/1374
C3H	4	c11434/f4p1/1599
C3H	5	c2418/f3p0/1649
C3H	6	c17271/f1p1/1468
C3H	7	c48546/f2p0/1429
C3H	8	c30890/f1p2/2963
C3H	9	c40916/f1p0/3905
C3H	10	c23378/f6p12/2822
C3H	11	c14288/f1p0/2057
C3H	12	c24749/f1p0/6748.2
C3H	13	c58003/f1p0/2756
C3H	14	c44122/f1p0/3001
C3H	15	c3286/f1p0/1923
C3H	16	c26444/f2p1/2607
C3H	17	c11454/f1p0/1622
C3H	18	c19828/f1p0/1849
C3H	19	c25000/f1p7/2375
C3H	20	c23728/f16p10/2509
C3H	21	c54267/f1p0/2479
C3H	22	c26260/f1p1/2545
C3H	23	c36279/f2p0/2476
C3H	24	c24236/f2p2/3029
C3H	25	c7078/f1p2/1885
C3H	26	c3651/f1p2/1710
C3H	27	c32304/f1p0/4999.1
C3H	28	c9054/f5p2/1939
C3H	29	c50180/f1p0/3844.1
C3H	30	c25564/f4p14/3100
C3H	31	c52151/f1p1/3112
C3H	32	c15936/f1p0/1698
C3H	33	c24922/f1p1/2238
C3H	34	c8983/f1p0/1982
C3H	35	c27141/f1p2/1609
C3H	36	c31474/f1p1/1726
C3H	37	c51424/f1p0/3847.1
C3H	38	c32654/f1p1/2959
C3H	39	c18005/f2p0/1680
C3H	40	c13917/f2p0/2089
C3H	41	c50714/f1p1/2777
C3H	42	c26516/f4p0/2592
C3H	43	c59176/f1p0/2958
C3H	44	c29663/f1p0/2139
C3H	45	c56355/f1p0/4456.1
C3H	46	c56984/f1p0/3005.1
C3H	47	c26278/f1p0/2627
C3H	48	c55122/f1p0/3693.2
C3H	49	c30174/f1p0/2577.1
C3H	50	c59176/f1p0/2958
C3H	51	c21163/f1p0/2006
C3H	52	c50714/f1p1/2777
C3H	53	c30850/f1p0/1835
C3H	54	c20353/f1p1/2210
C3H	55	c12073/f5p0/1872
C3H	56	c20353/f1p1/2210
C3H	57	c26278/f1p0/2627
C3H	58	c52546/f1p0/2727.1
C3H	59	c26516/f4p0/2592
C3H	60	c32654/f1p1/2959
C3H	61	c61196/f1p1/3733
C3H	62	c28035/f1p0/2618
C3H	63	c28035/f1p0/2618
C3H	64	c28035/f1p0/2618
C3H	65	c12073/f5p0/1872
C3H	66	c51424/f1p0/3847.1
C3H	67	c20353/f1p1/2210
C3H	68	c30850/f1p0/1835
C3H	69	c56355/f1p0/4456.2
C3H	70	c30174/f1p0/2577.1
C3H	71	c30174/f1p0/2577.1
C3H	72	c55122/f1p0/3693.1
C3H	73	c56984/f1p0/3005.2
C3H	74	c54796/f1p0/2881
C3H	75	c13768/f2p1/1944
C3H	76	c30814/f1p1/1462
C3H	77	c2309/f3p1/1960
C3H	78	c17429/f1p0/2080
C3H	79	c44516/f1p0/2501.2
C3H	80	c8600/f1p1/1984
C3H	81	c18397/f1p0/2040
C3H	82	c44516/f1p0/2501.1
C3H	83	c835/f5p0/1661
C3H	84	c14574/f1p0/4196.1.1
C3H	85	c12073/f5p0/1872
C3H	86	c21215/f1p0/1681
C3H	87	c7704/f1p0/1809
C3H	88	c10838/f1p0/1936
C3H	89	c18279/f1p1/1294
C3H	90	c30136/f1p0/2901.1
C3H	91	c19967/f1p1/1816
C3H	92	c11969/f1p0/1489
C3H	93	c15482/f1p0/1595
C3H	94	c34070/f1p0/4106.1
C3H	95	c40756/f1p0/3014
C3H	96	c41042/f1p1/3114
C3H	97	c23498/f5p3/2792
C3H	98	c27677/f5p6/2869
C3H	99	c6403/f1p0/1906
C3H	100	c25287/f1p0/2905
C3H	101	c58474/f1p0/4311.1
C3H	102	c50550/f1p0/4026.1
C3H	103	c44048/f1p0/2713.1
C3H	104	c3947/f1p1/1427
C3H	105	c11727/f1p2/2031
C3H	106	c15349/f1p0/1745
C3H	107	c57181/f1p0/3962.2
C3H	108	c7884/f1p0/1382.1
C3H	109	c61196/f1p1/3733
C3H	110	c48671/f2p1/3574
DBB	1	c4400/f1p0/1642
DBB	2	c13652/f2p1/1967
DBB	3	c20088/f1p1/1403
DBB	4	c11289/f1p0/1540
DBB	5	c10397/f1p0/1749
DBB	6	c16582/f1p0/1593
DBB	7	c21045/f1p0/1206
DBB	8	c10916/f1p0/1922.1
DBB	9	c26068/f2p1/1469
DBB	10	c58763/f1p0/2504.1
DBB	11	c15011/f1p0/1737
DBB	12	c1062/f6p0/1767
DBB	13	c52668/f2p0/2719
DBB	14	c13319/f3p2/1541
DBB	15	c2849/f1p0/1934
DBB	16	c62379/f1p5/1779
DBB	17	c11663/f1p2/1583
DBB	18	c40392/f1p2/2772
DBB	19	c21077/f1p0/1855
DBB	20	c16871/f2p0/1705
DBB	21	c20251/f1p0/2090
DBB	22	c22529/f3p0/1765
DBB	23	c21998/f1p0/1613
DBB	24	c12777/f1p0/1582
DBB	25	c7866/f1p0/1921
Dof	1	c9639/f1p0/1999
Dof	2	c5904/f1p1/2104
Dof	3	c21464/f1p0/1741
Dof	4	c57020/f1p0/4505.1
Dof	5	c16129/f1p0/1671
Dof	6	c5908/f1p0/1654
Dof	7	c18595/f1p0/1786
Dof	8	c18335/f2p0/2074
Dof	9	c55839/f1p0/1330
Dof	10	c713/f7p1/1871
Dof	11	c5968/f1p0/1834
Dof	12	c13884/f2p0/2184
Dof	13	c43465/f1p0/3093.1
Dof	14	c10128/f2p0/1824
Dof	15	c17211/f1p1/1979
Dof	16	c18859/f1p0/1562
E2F/DP	1	c14128/f1p0/1705
E2F/DP	2	c2480/f2p0/1848
E2F/DP	3	c34359/f1p3/2035
E2F/DP	4	c26020/f1p0/1866
E2F/DP	5	c18560/f1p2/1658
E2F/DP	6	c55590/f1p0/2756
E2F/DP	7	c17033/f1p0/2130
E2F/DP	8	c21964/f1p0/2020
E2F/DP	9	c20508/f1p0/1595
E2F/DP	10	c57316/f1p1/2590
E2F/DP	11	c52537/f1p0/2904
E2F/DP	12	c59182/f1p0/5061.1
E2F/DP	13	c59182/f1p0/5061.2
EIL	1	c34455/f1p2/2278
EIL	2	c30685/f1p0/4024.1.1
EIL	3	c25888/f1p0/2184
EIL	4	c16830/f1p0/1968
EIL	5	c17358/f1p0/2187
EIL	6	c16886/f1p0/2173
EIL	7	c16793/f1p0/2308
EIL	8	c41559/f1p0/2529
EIL	9	c1701/f3p2/2195
EIL	10	c2755/f1p0/1851
EIL	11	c5280/f1p0/1973
EIL	12	c44754/f4p1/2565
EIL	13	c16087/f1p0/1828
EIL	14	c24990/f5p0/2642
EIL	15	c15964/f1p0/1845
EIL	16	c15776/f1p0/3135.1
EIL	17	c25792/f1p0/2728
EIL	18	c58825/f1p3/3171
EIL	19	c8291/f2p0/1611
EIL	20	c6823/f1p0/1702
EIL	21	c36606/f1p0/2619
EIL	22	c31836/f1p1/2278
EIL	23	c19446/f1p0/1585
EIL	24	c31836/f1p1/2278
EIL	25	c9592/f1p2/2227
EIL	26	c36606/f1p0/2619
EIL	27	c4334/f2p0/2175
EIL	28	c29105/f1p3/2461
EIL	29	c3082/f1p1/2191
EIL	30	c3898/f1p1/2382
EIL	31	c15776/f1p0/3135.2
EIL	32	c17468/f1p0/2317
EIL	33	c21670/f1p0/1961
EIL	34	c18036/f1p0/1885.1
EIL	35	c27519/f1p2/3181
EIL	36	c29105/f1p3/2461
EIL	37	c3898/f1p1/2382
EIL	38	c53324/f1p2/2547
EIL	39	c9592/f1p2/2227
EIL	40	c25792/f1p0/2728
EIL	41	c17468/f1p0/2317
EIL	42	c58825/f1p3/3171
EIL	43	c53324/f1p2/2547
EIL	44	c53324/f1p2/2547
EIL	45	c27519/f1p2/3181
EIL	46	c25792/f1p0/2728
EIL	47	c17468/f1p0/2317
EIL	48	c21670/f1p0/1961
ERF	1	c7107/f1p0/2325.1
ERF	2	c7471/f1p0/1989
ERF	3	c7270/f1p1/2142
ERF	4	c13812/f2p0/1814
ERF	5	c10975/f1p0/2093
ERF	6	c31512/f1p0/2593.1
ERF	7	c58187/f1p0/702
ERF	8	c49036/f1p0/3982
ERF	9	c6120/f2p2/1576
ERF	10	c9582/f4p1/1715
ERF	11	c3085/f1p0/1593
ERF	12	c24388/f2p7/1672
ERF	13	c970/f4p1/1706
ERF	14	c28172/f1p0/1814.1
ERF	15	c4010/f1p0/10974.2
ERF	16	c183/f12p16/1661
ERF	17	c265/f24p21/1885
ERF	18	c43649/f1p0/1018
ERF	19	c3148/f2p4/1493
ERF	20	c15630/f1p0/1722
ERF	21	c145/f45p14/1801
ERF	22	c22102/f1p0/1907
ERF	23	c33135/f1p2/2503.1
ERF	24	c21019/f1p0/1670
ERF	25	c5937/f1p0/1825
ERF	26	c17876/f1p3/1918
ERF	27	c19537/f1p0/1663.1
ERF	28	c224/f13p8/1886
ERF	29	c266/f27p6/1649
ERF	30	c110/f51p26/1663
ERF	31	c16786/f1p0/2841.1
ERF	32	c16786/f1p0/2841.2
ERF	33	c7637/f1p0/1848
ERF	34	c6885/f1p0/2167
ERF	35	c2879/f1p0/1946
ERF	36	c7590/f1p0/1589
ERF	37	c15956/f1p0/2502
ERF	38	c2801/f1p1/2196
ERF	39	c9320/f1p1/2051
ERF	40	c6536/f1p1/2028
ERF	41	c2443/f6p3/2130
ERF	42	c55259/f1p0/1004
ERF	43	c20323/f1p0/1587
ERF	44	c26173/f1p0/1645.1
ERF	45	c61200/f1p0/4241.2
ERF	46	c56181/f1p0/1083
ERF	47	c18033/f1p0/1579
ERF	48	c7020/f1p0/1057
ERF	49	c14365/f1p0/1966
ERF	50	c19368/f1p2/1631
ERF	51	c9748/f1p0/1747
ERF	52	c4330/f1p1/1606
ERF	53	c17651/f1p1/1617
ERF	54	c13631/f3p1/1948
ERF	55	c16130/f1p1/1516
ERF	56	c18520/f1p1/1532
ERF	57	c7923/f1p0/1504
ERF	58	c10452/f1p0/1525
ERF	59	c41265/f2p0/2491
ERF	60	c3752/f1p0/2124
ERF	61	c42563/f1p0/2545.1
ERF	62	c17658/f1p0/1749
ERF	63	c31741/f1p0/1829
ERF	64	c4734/f4p0/2219
ERF	65	c20639/f1p0/1903
ERF	66	c54005/f1p1/2998
ERF	67	c1208/f5p2/1592
ERF	68	c54516/f1p1/1484
ERF	69	c1180/f5p2/1584
ERF	70	c13717/f2p2/1514
ERF	71	c21560/f1p0/1907
ERF	72	c6485/f1p2/1996
ERF	73	c52446/f1p0/1258
ERF	74	c19564/f1p0/1589
ERF	75	c38881/f1p0/2991
ERF	76	c39745/f1p2/3167
ERF	77	c41222/f1p2/2929
ERF	78	c42904/f1p0/2788
ERF	79	c56008/f1p0/2758
ERF	80	c45490/f1p0/2941
ERF	81	c30160/f2p4/2996
ERF	82	c33705/f4p6/3149
ERF	83	c39431/f1p5/3141
ERF	84	c12098/f1p0/2084
ERF	85	c32649/f1p0/1103
ERF	86	c40520/f1p0/2838
ERF	87	c46530/f1p1/3010
ERF	88	c18329/f1p0/1562
ERF	89	c32064/f1p0/2436.2
ERF	90	c33167/f1p0/3216
ERF	91	c61899/f1p13/1885
ERF	92	c34798/f2p1/2877
ERF	93	c8466/f1p0/1503
ERF	94	c31512/f1p0/2593.2
ERF	95	c12512/f1p0/1250
ERF	96	c12098/f1p0/2084
FAR1	1	c37285/f1p0/3021.1
FAR1	2	c34963/f1p3/3031
FAR1	3	c51672/f1p0/2888.2
FAR1	4	c49458/f1p0/2973
FAR1	5	c33361/f1p1/2762
FAR1	6	c60562/f2p0/3152
FAR1	7	c37565/f1p1/3374
FAR1	8	c26406/f1p0/3057
FAR1	9	c33389/f2p0/2975
FAR1	10	c32331/f2p1/3297
FAR1	11	c33207/f1p0/3059
FAR1	12	c60754/f1p0/3774.1
FAR1	13	c39823/f3p1/2961
FAR1	14	c28863/f2p0/2723
FAR1	15	c45966/f1p1/2640
FAR1	16	c25139/f1p0/2811
FAR1	17	c3807/f1p3/1678
FAR1	18	c33456/f3p2/2747
FAR1	19	c53306/f1p4/2473
FAR1	20	c43400/f1p0/2566
FAR1	21	c38673/f1p1/2772
FAR1	22	c51058/f1p0/3759
FAR1	23	c45829/f1p0/2882
FAR1	24	c30725/f2p1/3253
FAR1	25	c38378/f2p1/3123
FAR1	26	c29046/f1p1/3046
FAR1	27	c44584/f2p1/3219
FAR1	28	c40098/f1p0/3252
FAR1	29	c40896/f1p0/2862
FAR1	30	c37977/f1p1/2738
FAR1	31	c28367/f1p0/2968
FAR1	32	c41753/f1p0/3105
FAR1	33	c33524/f1p0/3064
FAR1	34	c10296/f1p0/1733
FAR1	35	c29046/f1p1/3046
FAR1	36	c35131/f1p0/2840
GATA	1	c4668/f1p0/2083.2
GATA	2	c3110/f2p0/1592
GATA	3	c54974/f1p0/2673
GATA	4	c35168/f1p0/2501
GATA	5	c2860/f1p0/5168.2
GATA	6	c2860/f1p0/5168.1
GATA	7	c18859/f1p0/1562
GATA	8	c30221/f1p1/2829.1
GATA	9	c13576/f2p1/2165
GATA	10	c11672/f2p0/1742
GATA	11	c19937/f1p0/1710
GATA	12	c22059/f1p0/2241
GATA	13	c3180/f1p0/1533
GRAS	1	c7950/f2p0/2003
GRAS	2	c11799/f1p0/1610
GRAS	3	c19878/f1p1/3743.1
GRAS	4	c18951/f1p0/1939
GRAS	5	c15951/f1p1/2339
GRAS	6	c12673/f1p1/2287
GRAS	7	c33543/f1p0/2598
GRAS	8	c8919/f1p0/2190
GRAS	9	c7447/f3p0/1793
GRAS	10	c28205/f1p0/1759
GRAS	11	c15993/f2p2/2128
GRAS	12	c29914/f1p0/3018.1
GRAS	13	c49671/f1p0/2577.2
GRAS	14	c6926/f1p0/1997
GRAS	15	c28642/f1p1/2873
GRAS	16	c45261/f1p2/2510
GRAS	17	c59988/f3p3/3284
GRAS	18	c55784/f1p0/2518
GRAS	19	c24336/f2p0/2014
GRAS	20	c18634/f2p0/2146
GRAS	21	c19302/f1p0/1517
GRAS	22	c43599/f1p0/4661.2
GRAS	23	c43599/f1p0/4661.1
GRAS	24	c29602/f1p0/2602
GRAS	25	c20583/f1p0/2150
GRAS	26	c36664/f2p2/2979
GRAS	27	c30820/f1p0/3250
GRAS	28	c28143/f1p0/3174
GRAS	29	c53111/f1p0/2891
GRAS	30	c36813/f2p0/2938
GRAS	31	c25972/f1p0/3112
GRAS	32	c7338/f1p0/1710
GRAS	33	c34515/f1p0/2644
GRAS	34	c45438/f1p0/2999
GRAS	35	c28166/f1p0/2120
GRAS	36	c6211/f1p2/1540
GRAS	37	c37333/f1p2/2746
GRAS	38	c35325/f2p4/1933
GRAS	39	c24647/f1p1/3047
GRAS	40	c33282/f1p0/2672
GRAS	41	c14723/f1p0/1712
GRAS	42	c41819/f1p0/2836
GRAS	43	c21750/f1p1/2027
GRAS	44	c45140/f2p2/2882
GRAS	45	c8149/f1p0/1991
GRAS	46	c23404/f8p1/3014
GRAS	47	c40977/f1p0/2626
GRAS	48	c8038/f1p0/1896
GRAS	49	c14458/f1p2/1765
GRAS	50	c19402/f1p1/2146
GRAS	51	c25313/f1p0/1675
GRAS	52	c19001/f1p0/1893
GRAS	53	c23665/f4p3/2793
GRAS	54	c30176/f1p0/4338.1
GRAS	55	c36686/f3p2/2641
GRAS	56	c6314/f4p0/2251
GRAS	57	c55428/f1p0/2795
GRAS	58	c26656/f1p0/2627
GRAS	59	c6348/f1p0/2160.1
GRAS	60	c13696/f2p5/2079
GRAS	61	c5928/f4p0/1881
GRAS	62	c20598/f1p0/2130.1
GRAS	63	c29912/f1p0/2283
GRAS	64	c10564/f1p0/1985
GRAS	65	c26430/f1p2/2560
GRAS	66	c49812/f1p2/2960
GRAS	67	c26441/f5p1/2901
GRAS	68	c4139/f1p2/1966
GRAS	69	c48502/f2p0/2847
GRAS	70	c6101/f2p4/2117
GRAS	71	c7506/f2p0/2222
GRAS	72	c14881/f1p2/1776
GRAS	73	c16846/f1p2/1975
GRAS	74	c5348/f4p7/2254
GRAS	75	c48911/f1p1/3880.1
GRAS	76	c11999/f1p0/2030
GRAS	77	c10076/f1p0/1489
GRAS	78	c42427/f1p0/2630
GRAS	79	c32264/f1p1/2720
GRAS	80	c3818/f2p1/1671
GRAS	81	c51154/f1p0/3132
GRAS	82	c3818/f2p1/1671
GRAS	83	c50974/f1p1/3586
GRAS	84	c54959/f1p0/2691
GRAS	85	c49991/f1p0/1903.1
GRAS	86	c15371/f1p0/1714
GRAS	87	c40544/f2p2/2845
GRAS	88	c11999/f1p0/2030
GRAS	89	c40544/f2p2/2845
GRAS	90	c21954/f1p0/1796
GRAS	91	c13696/f2p5/2079
GRAS	92	c42427/f1p0/2630
GRAS	93	c6176/f1p1/2198
GRAS	94	c26909/f1p0/1677
GRAS	95	c16846/f1p2/1975
GRAS	96	c7506/f2p0/2222
GRAS	97	c1957/f3p6/1868
GRAS	98	c5348/f4p7/2254
GRAS	99	c3015/f1p0/2023.1
GRAS	100	c4139/f1p2/1966
GRAS	101	c4307/f2p0/1750
GRAS	102	c13429/f2p1/1898
GRAS	103	c13546/f2p0/2089
GRAS	104	c14881/f1p2/1776
GRAS	105	c6308/f1p0/1672
GRAS	106	c54959/f1p0/2691
GRAS	107	c6101/f2p4/2117
GRAS	108	c26909/f1p0/1677
GRAS	109	c25848/f1p2/2972
GRAS	110	c17323/f1p0/1864
GRAS	111	c6308/f1p0/1672
GRAS	112	c48911/f1p1/3880.1
GRAS	113	c10763/f1p0/2603
GRAS	114	c19402/f1p1/2146
GRAS	115	c25848/f1p2/2972
GRAS	116	c23839/f1p1/2729
GRAS	117	c25848/f1p2/2972
GRAS	118	c6308/f1p0/1672
GRAS	119	c10564/f1p0/1985
GRAS	120	c6176/f1p1/2198
GRAS	121	c49473/f1p1/1263
GRAS	122	c10076/f1p0/1489
GRAS	123	c21597/f1p0/1656
GRAS	124	c48502/f2p0/2847
GRAS	125	c4139/f1p2/1966
GRAS	126	c49112/f1p0/3963
GRAS	127	c4307/f2p0/1750
GRAS	128	c26441/f5p1/2901
GRAS	129	c49112/f1p0/3963
GRAS	130	c17323/f1p0/1864
GRAS	131	c21597/f1p0/1656
GRAS	132	c32264/f1p1/2720
GRAS	133	c6314/f4p0/2251
HD-ZIP	1	c7939/f5p0/1670
HD-ZIP	2	c24473/f5p0/1697
HD-ZIP	3	c7584/f1p1/1704
HD-ZIP	4	c15372/f1p0/1496
HD-ZIP	5	c14306/f1p0/1826
HD-ZIP	6	c32445/f1p1/1876
HD-ZIP	7	c29989/f1p0/1501
HD-ZIP	8	c11655/f2p1/1741
HD-ZIP	9	c24689/f1p0/1419
HD-ZIP	10	c21966/f1p1/1540
HD-ZIP	11	c8707/f1p0/1618.1
HD-ZIP	12	c42595/f1p0/10494.3
HD-ZIP	13	c42595/f1p0/10494.1
HD-ZIP	14	c41528/f1p0/2828
HD-ZIP	15	c2544/f2p0/1775.1
HD-ZIP	16	c2285/f2p1/1943
HD-ZIP	17	c8310/f1p0/1830.1
HD-ZIP	18	c21478/f1p1/2013
HD-ZIP	19	c6684/f1p0/1738
HD-ZIP	20	c12778/f1p1/1783
HD-ZIP	21	c8901/f1p0/1649
HD-ZIP	22	c14330/f1p0/2110
HD-ZIP	23	c12909/f1p1/2124
HD-ZIP	24	c17004/f1p0/1414
HD-ZIP	25	c26534/f1p1/709
HD-ZIP	26	c50366/f1p0/3585
HD-ZIP	27	c59126/f1p2/2878
HD-ZIP	28	c28276/f1p5/3029
HD-ZIP	29	c28414/f1p0/3166
HD-ZIP	30	c27817/f1p0/3395
HD-ZIP	31	c48787/f1p1/2938
HD-ZIP	32	c24179/f2p1/2958
HD-ZIP	33	c46658/f1p0/3052
HD-ZIP	34	c34132/f1p0/2973
HD-ZIP	35	c27470/f1p1/2899
HD-ZIP	36	c56547/f1p2/3763.1
HD-ZIP	37	c50735/f1p0/4455.1
HD-ZIP	38	c58414/f1p1/3482.1
HD-ZIP	39	c45883/f1p0/3169
HD-ZIP	40	c42239/f1p1/3282
HD-ZIP	41	c26554/f3p1/2958
HD-ZIP	42	c58694/f1p1/2958
HSF	1	c29339/f1p0/2765
HSF	2	c2900/f1p1/2057
HSF	3	c5030/f1p2/2075
HSF	4	c11335/f1p1/1833
HSF	5	c1751/f4p1/1555
HSF	6	c9673/f1p1/1965
HSF	7	c10152/f1p0/1695
HSF	8	c11094/f1p0/1358
HSF	9	c20760/f2p0/1511
HSF	10	c1049/f3p0/1958
HSF	11	c26090/f1p0/1528
HSF	12	c1817/f2p4/1491
HSF	13	c9968/f1p0/1669
HSF	14	c6882/f1p0/1816.1
HSF	15	c16084/f1p0/1730
HSF	16	c17975/f1p2/2102
HSF	17	c13900/f2p2/1698
HSF	18	c13756/f2p0/1635
HSF	19	c10132/f1p0/1660
HSF	20	c34721/f1p0/1706
HSF	21	c50932/f1p0/2919
HSF	22	c19740/f1p0/1743
HSF	23	c5948/f1p0/1598
HSF	24	c24677/f1p0/2736
HSF	25	c33088/f1p0/2533
HSF	26	c54293/f1p0/1256
HSF	27	c35227/f1p0/2718.1
HSF	28	c35227/f1p0/2718.2
HSF	29	c33088/f1p0/2533
MADS	1	c32491/f1p0/2514
MADS	2	c45053/f1p0/2948
MADS	3	c39049/f1p0/2981
MADS	4	c7900/f1p0/1567
MADS	5	c8416/f1p0/1667
MADS	6	c51110/f1p0/2526
MADS	1	c31042/f1p1/1378
MADS	2	c33259/f1p0/1018
MADS	3	c3659/f1p0/1605
MADS	4	c7456/f1p0/1162
MADS	5	c6384/f1p0/1341
R2R3-MYB	1	c975/f6p1/1568
R2R3-MYB	2	c15606/f1p1/1766
R2R3-MYB	3	c1168/f6p2/1657
R2R3-MYB	4	c30971/f1p0/1245
R2R3-MYB	5	c14025/f1p0/1472
R2R3-MYB	6	c11652/f1p1/1351
R2R3-MYB	7	c54654/f1p0/3496.2
R2R3-MYB	8	c42662/f1p0/2545
R2R3-MYB	9	c34716/f1p0/3352.1
R2R3-MYB	10	c34181/f2p0/2765
R2R3-MYB	11	c24744/f1p1/2607
R2R3-MYB	12	c7690/f1p0/1598.1
R2R3-MYB	13	c9709/f1p0/1891
R2R3-MYB	14	c15127/f1p1/1598
R2R3-MYB	15	c49444/f1p2/3474
R2R3-MYB	16	c61163/f1p2/3613
R2R3-MYB	17	c18353/f1p0/2070
R2R3-MYB	18	c54504/f1p4/3639
R2R3-MYB	19	c5749/f2p1/1648
R2R3-MYB	20	c55127/f1p1/3551
R2R3-MYB	21	c52626/f1p3/3673
R2R3-MYB	22	c49493/f1p0/3044.1
R2R3-MYB	23	c61163/f1p2/3613
MYB_related	1	c59267/f1p1/3401
MYB_related	2	c50449/f1p0/3595.1
MYB_related	3	c21705/f1p0/1533
MYB_related	4	c56413/f1p0/2359
MYB_related	5	c18701/f1p0/2017
MYB_related	6	c21187/f1p0/1553
MYB_related	7	c8791/f1p0/1393
MYB_related	8	c31357/f1p0/1629
MYB_related	9	c27927/f1p0/1615
MYB_related	10	c7681/f1p1/1611
MYB_related	11	c43448/f1p0/2747
MYB_related	12	c17796/f1p0/2012
MYB_related	13	c7449/f1p0/1925.2
MYB_related	14	c27312/f1p0/3067
MYB_related	15	c30104/f1p0/2984.1
MYB_related	16	c52269/f1p0/3388
MYB_related	17	c38613/f1p0/2766
MYB_related	18	c28520/f3p2/2655
MYB_related	19	c19133/f1p0/1618
MYB_related	20	c11775/f1p0/1678
MYB_related	21	c12043/f1p1/1576
MYB_related	22	c2481/f3p3/1686
MYB_related	23	c12171/f1p3/1384
MYB_related	24	c10469/f1p2/1978
MYB_related	25	c37168/f1p0/2518
MYB_related	26	c11074/f1p0/1571
MYB_related	27	c34875/f1p2/1584
MYB_related	28	c49520/f1p4/3388
MYB_related	29	c17824/f1p1/1966
MYB_related	30	c2848/f1p0/1583
MYB_related	31	c19710/f1p0/1550
MYB_related	32	c3792/f2p0/1642
MYB_related	33	c30019/f1p1/2534
MYB_related	34	c18875/f1p2/1747
MYB_related	35	c37028/f1p0/2636.1
MYB_related	36	c13186/f4p3/1590
MYB_related	37	c16481/f1p0/1695
MYB_related	38	c13925/f2p0/1881
MYB_related	39	c14095/f1p0/1752
MYB_related	40	c4271/f5p1/1775
MYB_related	41	c19874/f1p0/1650
MYB_related	42	c2208/f2p0/1877
MYB_related	43	c17031/f1p0/2035.1
MYB_related	44	c17909/f1p0/1799
MYB_related	45	c18038/f1p0/1353
MYB_related	46	c4469/f1p0/1510.1
MYB_related	47	c5655/f1p0/2035
MYB_related	48	c14703/f1p0/1860.2
MYB_related	49	c13647/f2p0/1680
MYB_related	50	c10939/f1p0/1477
MYB_related	51	c50514/f1p0/2675.2
MYB_related	52	c45670/f1p2/2844
MYB_related	53	c21810/f1p0/1719
MYB_related	54	c2130/f2p0/1641
MYB_related	55	c8669/f1p0/1445
MYB_related	56	c32897/f1p0/2682.2
MYB_related	57	c26646/f1p1/2220
MYB_related	58	c4854/f1p0/1477
MYB_related	59	c4363/f1p0/1976
MYB_related	60	c19914/f1p1/1723
MYB_related	61	c24392/f2p0/2655
MYB_related	62	c60934/f1p0/4352
MYB_related	63	c46869/f3p1/2858
MYB_related	64	c27516/f2p1/2478
MYB_related	65	c44772/f1p0/3149.2
MYB_related	66	c27815/f1p1/2610
MYB_related	67	c11962/f1p0/1343
MYB_related	68	c41965/f1p0/3035.1
MYB_related	69	c13814/f2p1/1879
MYB_related	70	c17796/f1p0/2012
MYB_related	71	c21598/f1p0/2027.1
MYB_related	72	c14774/f1p0/1434.1
MYB_related	73	c59350/f1p0/3797
MYB_related	74	c45969/f1p1/2651
MYB_related	75	c53352/f1p0/3563
MYB_related	76	c11134/f1p0/1477
MYB_related	77	c12191/f1p0/1626
MYB_related	78	c56413/f1p0/2359
MYB_related	79	c60757/f1p2/3768
MYB_related	80	c54444/f1p2/2959
MYB_related	81	c26014/f1p0/2568
MYB_related	82	c33461/f1p0/2807
MYB_related	83	c24227/f2p2/2961
MYB_related	84	c55912/f1p2/2816
MYB_related	85	c19216/f1p0/2131.1
MYB_related	86	c7449/f1p0/1925.1
MYB_related	87	c33633/f1p0/2763.2
MYB_related	88	c9078/f1p0/2033.2
MYB_related	89	c2828/f1p0/1950
MYB_related	90	c21671/f1p0/1553
MYB_related	91	c8843/f1p0/1632
MYB_related	92	c21283/f1p0/2121
MYB_related	93	c28922/f1p0/2575
MYB_related	94	c41066/f1p3/2998
MYB_related	95	c4580/f2p1/2075
MYB_related	96	c32078/f1p0/2137
MYB_related	97	c17190/f1p0/2071
MYB_related	98	c21566/f1p0/1654
MYB_related	99	c8455/f1p0/5282.1
MYB_related	100	c50174/f1p1/3967.1
MYB_related	101	c49062/f1p0/2928
MYB_related	102	c34609/f1p0/2968
MYB_related	103	c29757/f1p0/2721
MYB_related	104	c55600/f1p0/3476
MYB_related	105	c14147/f1p1/2020
MYB_related	106	c25602/f1p0/1907.1
MYB_related	107	c21810/f1p0/1719
MYB_related	108	c4295/f1p0/1699
MYB_related	109	c59379/f1p0/2730.1
MYB_related	110	c50378/f1p0/2717
MYB_related	111	c56385/f1p1/4118
MYB_related	112	c26177/f1p1/2703
NAC	1	c20715/f2p0/2126
NAC	2	c4478/f1p0/2182
NAC	3	c11783/f1p2/1951
NAC	4	c29506/f1p0/1763
NAC	5	c1173/f2p0/1672
NAC	6	c30791/f1p0/2337
NAC	7	c8701/f5p2/1909
NAC	8	c12613/f1p0/1829
NAC	9	c6095/f1p0/1648
NAC	10	c9858/f1p0/1526
NAC	11	c51917/f1p0/1305
NAC	12	c35253/f6p3/2058
NAC	13	c8636/f1p0/1580
NAC	14	c12592/f1p0/2475
NAC	15	c20382/f1p0/1241
NAC	16	c14585/f1p0/1561.1
NAC	17	c5432/f1p0/1568
NAC	18	c56291/f1p0/1087
NAC	19	c27965/f1p0/2971.2
NAC	20	c42360/f1p1/2647
NAC	21	c4641/f1p0/6169.1
NAC	22	c35259/f4p6/2057
NAC	23	c21776/f1p2/1373
NAC	24	c2798/f1p0/2189.2
NAC	25	c16126/f1p0/1528
NAC	26	c11856/f1p1/1879
NAC	27	c21690/f1p0/1246
NAC	28	c3375/f1p0/1061
NAC	29	c8367/f1p5/2168
NAC	30	c28445/f3p0/1293
NAC	31	c15775/f1p0/2957.1
NAC	32	c3862/f1p1/2064
NAC	33	c53178/f1p0/2547
NAC	34	c18330/f1p0/1813
NAC	35	c8338/f1p0/3978.2
NAC	36	c14743/f1p0/10627.1.1
NAC	37	c9862/f2p0/2107
NAC	38	c4641/f1p0/6169.2
NAC	39	c48774/f1p1/2740.1
NAC	40	c53052/f1p2/2974.1
NAC	41	c20327/f1p0/1424.1
NAC	42	c13477/f2p0/1647
NAC	43	c59101/f1p0/3417.1
NAC	44	c29899/f1p0/3020
NAC	45	c53849/f1p0/2812
NAC	46	c34215/f1p2/2824
NAC	47	c33567/f1p2/3140
NAC	48	c19916/f1p0/1549
NAC	49	c22054/f1p0/1649
NAC	50	c736/f7p3/2043
NAC	51	c46341/f1p1/2677
NAC	52	c17137/f1p0/1626
NAC	53	c896/f5p0/2038
NAC	54	c12056/f1p0/1502
NAC	55	c11326/f1p2/1905
NF-X1	1	c46033/f1p1/2830
NF-X1	2	c58931/f1p0/3924
NF-X1	3	c32534/f1p1/3179
NF-X1	4	c54291/f1p0/3057
NF-X1	5	c57433/f1p1/2841
NF-X1	6	c54351/f1p4/4369
NF-X1	7	c54291/f1p0/3057
NF-X1	8	c49022/f1p1/3032
NF-X1	9	c49916/f1p0/3181
NF-X1	10	c54351/f1p4/4369
NF-X1	11	c46033/f1p1/2830
Nin-like	1	c25017/f1p0/4105.1
Nin-like	2	c42758/f1p2/2748
Nin-like	3	c27997/f2p1/3037
Nin-like	4	c42443/f1p1/2568
Nin-like	5	c49051/f1p1/3421
Nin-like	6	c31050/f1p0/3096
Nin-like	7	c57954/f1p1/3526
Nin-like	8	c37345/f1p1/3184
Nin-like	9	c44063/f1p1/3215
Nin-like	10	c48649/f2p2/3972
Nin-like	11	c45857/f1p2/3082.1
Nin-like	12	c45351/f1p0/2721
Nin-like	13	c14166/f1p0/3929.2
Nin-like	14	c24553/f4p1/3139
Nin-like	15	c33057/f1p0/2915
Nin-like	16	c48124/f4p3/3838
Nin-like	17	c29611/f1p3/3339
Nin-like	18	c45046/f1p0/2829
Nin-like	19	c34934/f1p1/2994
Nin-like	20	c30704/f2p2/3230
Nin-like	21	c52058/f1p0/3575
Nin-like	22	c41854/f1p1/3060
Nin-like	23	c37420/f1p1/3076
Nin-like	24	c52502/f1p1/2919
Nin-like	25	c49818/f1p0/3466
Nin-like	26	c43333/f1p1/2622
Nin-like	27	c43333/f1p1/2622
Nin-like	28	c6178/f1p0/2367
SBP	1	c7420/f1p0/1614
SBP	2	c19105/f1p0/2123
SBP	3	c58599/f1p0/2490
SBP	4	c17067/f1p0/2109
SBP	5	c12119/f1p0/2122
SBP	6	c30530/f1p1/1867
SBP	7	c54883/f1p3/3892
SBP	8	c14999/f1p0/1464
SBP	9	c57970/f1p9/4161
SBP	10	c47914/f3p5/4062
SBP	11	c15408/f1p0/1793
SBP	12	c16575/f1p0/1437
SBP	13	c35004/f1p0/2579
SBP	14	c30938/f1p0/2951
SBP	15	c50075/f1p0/3526
SBP	16	c49576/f1p0/3943.1
SBP	17	c61036/f1p0/4129
SBP	18	c28519/f1p0/3002
SBP	19	c42975/f1p0/2871
SBP	20	c52914/f1p0/3982
SBP	21	c58988/f1p0/2965
SBP	22	c48667/f2p4/3707
SBP	23	c60919/f1p1/3910.1
SBP	24	c51854/f1p1/3516
SBP	25	c29545/f1p0/3082
SBP	26	c42887/f1p0/2975.1
SBP	27	c50860/f1p0/2893.1
SBP	28	c56609/f1p0/2913
SBP	29	c47695/f8p2/3975
SBP	30	c58775/f1p0/2678.1
SBP	31	c41343/f1p1/2616
SBP	32	c48000/f4p2/3832
SBP	33	c47994/f3p0/3770
SBP	34	c48140/f4p2/3689
SBP	35	c21025/f1p1/2031
SBP	36	c6250/f1p0/1561
SBP	37	c42068/f1p0/2823
SBP	38	c61725/f2p4/3811
SBP	39	c34046/f1p4/3227
SBP	40	c48676/f3p2/3802
SBP	41	c59250/f1p0/3521
TALE	1	c29816/f1p0/2636
TALE	2	c62222/f1p2/2666
TALE	3	c23505/f8p4/2719
TALE	4	c29630/f1p2/2515
TALE	5	c8876/f1p5/1704
TALE	6	c30708/f1p0/3684.1
TALE	7	c36855/f1p0/2881
TALE	8	c32622/f1p1/2642
TALE	9	c43648/f1p0/3626
TALE	10	c21710/f1p0/1589
TALE	11	c7435/f1p0/1853
TALE	12	c45705/f1p1/2665
TALE	13	c24157/f2p1/2529
TALE	14	c10020/f1p1/2023
TALE	15	c21500/f1p1/2001
TALE	16	c23196/f24p6/2725
TALE	17	c23380/f14p10/2852
TALE	18	c56447/f1p0/4385
TALE	19	c27454/f1p1/2781
TALE	20	c32645/f1p0/2868
TALE	21	c57411/f1p4/2709
TALE	22	c26100/f2p0/2660
TALE	23	c23237/f6p3/2728
TALE	24	c33028/f1p0/2820
TALE	25	c48633/f2p5/2660
TALE	26	c23653/f8p7/2897
TALE	27	c62902/f1p3/2577
TALE	28	c54662/f1p1/2630
TALE	29	c43080/f1p2/2694
TALE	30	c3750/f1p0/2096
TALE	31	c31930/f1p0/2742
TALE	32	c50607/f1p0/2561
TALE	33	c32092/f1p1/2517
TALE	34	c20048/f1p1/1700
TALE	35	c57074/f1p1/2548.1
TALE	36	c37254/f1p0/2851
TALE	37	c43935/f1p0/2637
TALE	38	c53172/f1p1/2562
TALE	39	c36194/f2p0/2624
TALE	40	c45589/f1p1/2648
TALE	41	c18853/f2p0/2131
TALE	42	c45393/f1p1/3000
TALE	43	c60257/f1p1/2651
TALE	44	c44226/f1p0/2967
TALE	45	c50502/f1p0/2684
TALE	46	c9825/f1p0/1811
TALE	47	c39198/f1p0/2541
TALE	48	c23173/f6p1/2832
TALE	49	c6738/f1p0/2123
TALE	50	c25365/f1p1/2552
TALE	51	c52292/f1p0/2943
TALE	52	c6788/f1p0/1879
TALE	53	c59480/f1p0/2818
TALE	54	c61496/f1p0/3598
TALE	55	c25378/f1p1/2933
TALE	56	c27871/f1p1/2803
TALE	57	c42700/f1p0/3079.1
TALE	58	c49336/f1p1/3037.1
TALE	59	c38463/f1p0/3122
TALE	60	c51415/f1p0/2632.1
TCP	1	c18017/f1p0/1851
TCP	2	c19969/f1p2/1935
TCP	3	c28340/f1p0/1857
TCP	4	c20787/f1p0/2244
TCP	5	c1270/f2p2/1893
TCP	6	c15287/f2p0/1730
TCP	7	c15466/f1p0/1911
TCP	8	c2475/f4p0/1673
TCP	9	c56805/f1p1/3887.1
TCP	10	c19196/f1p0/1658
TCP	11	c43928/f1p1/2905.1
TCP	12	c9401/f1p0/1294
TCP	13	c20603/f2p0/1478
TCP	14	c11030/f2p0/1919
TCP	15	c6533/f1p0/2263.1
TCP	16	c5823/f1p0/1651.1
TCP	17	c22705/f1p0/2215
TCP	18	c21060/f2p0/1907
TCP	19	c16473/f1p0/2007
TCP	20	c6744/f2p1/2111
Trihelix	1	c5207/f1p0/1672
Trihelix	2	c14233/f1p1/1997
Trihelix	3	c51196/f1p0/2626
Trihelix	4	c6356/f1p0/1996
Trihelix	5	c16316/f1p0/1685
Trihelix	6	c17247/f1p0/1933
Trihelix	7	c45423/f1p1/2860
Trihelix	8	c24615/f1p0/2707.1
Trihelix	9	c31809/f1p0/2854.1
Trihelix	10	c7766/f1p0/1487
Trihelix	11	c6287/f1p0/1624
Trihelix	12	c19034/f1p0/1686
Trihelix	13	c51783/f1p0/1551
Trihelix	14	c25142/f1p1/2637
Trihelix	15	c43508/f1p1/2333
Trihelix	16	c17108/f1p1/1939
Trihelix	17	c1888/f3p1/2074
Trihelix	18	c12930/f2p3/1844
Trihelix	19	c5819/f1p2/1760
Trihelix	20	c7101/f1p0/1813
Trihelix	21	c2181/f4p0/1650
Trihelix	22	c12466/f1p1/1828
Trihelix	23	c39115/f1p0/2776
Trihelix	24	c25142/f1p1/2637
Trihelix	25	c10750/f2p1/1994
Trihelix	26	c18942/f1p0/1583
Trihelix	27	c17439/f1p0/1635
Trihelix	28	c9185/f1p1/1763
Trihelix	29	c10390/f1p0/1505
Trihelix	30	c11870/f1p0/2132
Trihelix	31	c10505/f3p2/1821
Trihelix	32	c52385/f1p0/14256.3
Trihelix	33	c59017/f1p3/3134
Trihelix	34	c21591/f1p0/1956
Trihelix	35	c61488/f1p1/3477
Trihelix	36	c12961/f2p1/1950
Trihelix	37	c21591/f1p0/1956
Trihelix	38	c40701/f1p1/2247
Trihelix	39	c17338/f3p1/2010
Trihelix	40	c4639/f1p3/1638
Trihelix	41	c22153/f1p0/2109
WOX	1	c4827/f1p0/1609
WOX	2	c28276/f1p5/3029
WOX	3	c56547/f1p2/3763.1
WRKY	1	c16265/f1p0/1896
WRKY	2	c19788/f1p1/2275
WRKY	3	c3032/f1p0/1981
WRKY	4	c25282/f1p0/1707
WRKY	5	c14750/f1p1/1904
WRKY	6	c17967/f1p1/1860
WRKY	7	c5394/f1p1/1710
WRKY	8	c12347/f1p0/1759
WRKY	9	c2530/f4p0/1812
WRKY	10	c1886/f8p1/1773
WRKY	11	c13418/f3p1/2104
WRKY	12	c41115/f1p0/3318
WRKY	13	c40847/f1p2/2843
WRKY	14	c15926/f1p0/1849
WRKY	15	c15811/f1p0/2087
WRKY	16	c21473/f1p0/1821
WRKY	17	c50774/f1p0/3797
WRKY	18	c43374/f2p3/3182
WRKY	19	c57927/f1p0/2467
WRKY	20	c35597/f1p1/2032
WRKY	21	c47865/f3p2/2156
WRKY	22	c19064/f1p1/1514
WRKY	23	c1863/f4p0/1717
WRKY	24	c2486/f3p2/2065
WRKY	25	c42769/f1p1/4724.1
WRKY	26	c9776/f1p1/2039
WRKY	27	c21430/f1p0/2118
WRKY	28	c8000/f3p0/1894
WRKY	29	c8976/f1p0/1643.1
WRKY	30	c18966/f1p0/1888
WRKY	31	c8359/f2p0/2097
WRKY	32	c11676/f1p0/1402
WRKY	33	c34968/f1p0/1649
WRKY	34	c16548/f1p0/2039
WRKY	35	c14442/f1p2/2081
WRKY	36	c27040/f1p0/6862.3.3
WRKY	37	c19818/f1p0/2070
WRKY	38	c26158/f1p1/1904
WRKY	39	c11120/f1p0/1694
WRKY	40	c5926/f1p0/1439
WRKY	41	c15692/f1p0/2063
WRKY	42	c27040/f1p0/6862.3.1
WRKY	43	c23322/f4p2/1549
WRKY	44	c30979/f1p0/1337
WRKY	45	c28486/f1p0/3054.1
WRKY	46	c27040/f1p0/6862.1.1
WRKY	47	c3443/f1p0/1524
WRKY	48	c9322/f1p0/1712
WRKY	49	c35908/f9p2/2014
WRKY	50	c17928/f1p0/1938
WRKY	51	c6895/f1p0/1596
WRKY	52	c17207/f1p1/1488
WRKY	53	c14055/f1p0/1755
WRKY	54	c17548/f1p0/2133.1
WRKY	55	c30521/f1p0/1799
WRKY	56	c25546/f1p0/1811
WRKY	57	c42836/f1p0/1187
WRKY	58	c16985/f1p0/1829
WRKY	59	c14771/f1p0/1623.1
WRKY	60	c31229/f1p0/1983
WRKY	61	c9779/f2p1/1803
WRKY	62	c16791/f1p0/1750
WRKY	63	c58438/f1p0/3889.1
WRKY	64	c3969/f2p3/1787
WRKY	65	c16645/f1p0/1602
WRKY	66	c44537/f1p0/2959.1
WRKY	67	c4933/f1p0/1594
WRKY	68	c27485/f1p0/1781
WRKY	69	c11087/f1p0/1755
WRKY	70	c15174/f1p0/1681
WRKY	71	c20091/f1p0/1442
WRKY	72	c45472/f1p0/2475
WRKY	73	c2774/f1p0/1563
WRKY	74	c30322/f1p0/2670.1
WRKY	75	c34826/f1p0/2160.1
WRKY	76	c44537/f1p0/2959.1
WRKY	77	c2851/f6p0/2033
WRKY	78	c21430/f1p0/2118
WRKY	79	c43281/f2p0/2580
WRKY	80	c34826/f1p0/2160.1
WRKY	81	c30322/f1p0/2670.2
WRKY	82	c54826/f1p0/3965
WRKY	83	c10618/f1p1/1905
WRKY	84	c2486/f3p2/2065
WRKY	85	c17928/f1p0/1938
WRKY	86	c45801/f1p0/2730
WRKY	87	c10618/f1p1/1905
WRKY	88	c30322/f1p0/2670.1
WRKY	89	c9258/f1p0/2051
WRKY	90	c34826/f1p0/2160.1
WRKY	91	c31391/f1p0/2551.1
WRKY	92	c7605/f1p0/1828
WRKY	93	c43281/f2p0/2580
WRKY	94	c11077/f2p2/1846
WRKY	95	c8346/f1p0/1694
WRKY	96	c33059/f2p0/2718
bHLH	1	c28273/f1p0/2757
bHLH	2	c49440/f1p0/4137.1
bHLH	3	c34824/f1p2/2474
bHLH	4	c28122/f1p2/2444
bHLH	5	c42259/f1p0/2394
bHLH	6	c25994/f1p0/2032
bHLH	7	c28316/f1p2/2906
bHLH	8	c34006/f1p1/2886
bHLH	9	c26622/f1p1/2739
bHLH	10	c4868/f1p0/2096
bHLH	11	c41585/f1p1/2973
bHLH	12	c24526/f4p4/2854
bHLH	13	c42314/f1p0/3005.1
bHLH	14	c30978/f1p0/2953.1
bHLH	15	c17854/f1p1/1922
bHLH	16	c41208/f1p1/2630
bHLH	17	c32010/f1p1/2567
bHLH	18	c32745/f1p0/1676
bHLH	19	c15513/f1p0/1582
bHLH	20	c33563/f1p1/2530
bHLH	21	c31451/f2p0/2474
bHLH	22	c49848/f1p0/2734
bHLH	23	c35136/f1p0/5032.2
bHLH	24	c5131/f2p0/1580
bHLH	25	c26005/f1p0/3385.1
bHLH	26	c29679/f1p0/1533
bHLH	27	c28633/f1p0/3092.1
bHLH	28	c19369/f1p0/1887
bHLH	29	c56470/f1p0/2528
bHLH	30	c34899/f1p0/1752
bHLH	31	c20862/f1p0/1918
bHLH	32	c11089/f1p0/2115
bHLH	33	c36359/f3p0/2735
bHLH	34	c5547/f1p0/1957
bHLH	35	c27254/f5p0/2659
bHLH	36	c23442/f8p3/2653
bHLH	37	c34238/f1p0/1979
bHLH	38	c13962/f2p0/1424
bHLH	39	c24027/f2p0/2312
bHLH	40	c6264/f1p1/1888.1
bHLH	41	c7995/f1p0/1880
bHLH	42	c4889/f1p0/1390
bHLH	43	c18567/f1p0/1200
bHLH	44	c11108/f1p0/1989
bHLH	45	c7389/f1p0/2344.1
bHLH	46	c7970/f1p0/1873
bHLH	47	c7054/f6p1/1848
bHLH	48	c16221/f1p0/1454.1
bHLH	49	c17221/f1p0/1584
bHLH	50	c38061/f1p0/2768
bHLH	51	c3490/f1p0/1757
bHLH	52	c9901/f1p0/1515
bHLH	53	c7897/f2p0/1534.1
bHLH	54	c31754/f1p0/1947
bHLH	55	c8690/f1p0/1423
bHLH	56	c27301/f1p2/2705
bHLH	57	c3857/f1p0/1759
bHLH	58	c13511/f2p1/1870
bHLH	59	c13438/f3p2/1948
bHLH	60	c13346/f3p6/1632
bHLH	61	c26376/f1p0/2794
bHLH	62	c30232/f1p0/2843
bHLH	63	c11801/f1p0/1504
bHLH	64	c4021/f1p0/1864
bHLH	65	c12862/f1p0/1858
bHLH	66	c31191/f1p0/2637
bHLH	67	c17536/f1p0/2104.1
bHLH	68	c43444/f1p0/2966.1
bHLH	69	c12817/f2p0/1524
bHLH	70	c12362/f2p0/1972
bHLH	71	c15135/f1p1/1886
bHLH	72	c8134/f1p0/1667
bHLH	73	c15444/f1p0/1559
bHLH	74	c7150/f1p0/1785
bHLH	75	c34351/f1p0/1728
bHLH	76	c56517/f1p0/1749.2
bHLH	77	c30852/f1p0/3126
bHLH	78	c10949/f1p0/2180.1
bHLH	79	c33169/f3p0/3135
bHLH	80	c17980/f1p0/1595.1
bHLH	81	c48505/f2p3/2593
bHLH	82	c13765/f2p0/1603
bHLH	83	c29619/f1p0/2695
bHLH	84	c33222/f1p2/3105
bHLH	85	c6421/f1p0/1895
bHLH	86	c46476/f1p0/2880
bHLH	87	c54400/f1p2/2738.1
bHLH	88	c5426/f1p0/1985
bHLH	89	c27273/f1p3/2729
bHLH	90	c32731/f1p0/3561
bHLH	91	c29836/f1p0/3023
bHLH	92	c39079/f1p0/2643
bHLH	93	c61095/f1p1/1505.1
bHLH	94	c27841/f1p0/3097
bHLH	95	c28771/f1p0/2617.1
bZIP	1	c22041/f1p0/1709
bZIP	2	c3248/f1p1/1946
bZIP	3	c30795/f1p1/2881
bZIP	4	c39292/f1p2/3072
bZIP	5	c5959/f2p1/1830
bZIP	6	c9334/f1p0/1780
bZIP	7	c17231/f2p2/1698
bZIP	8	c18523/f1p0/1801
bZIP	9	c10544/f1p1/1846
bZIP	10	c5525/f1p0/1837
bZIP	11	c1383/f4p1/1667
bZIP	12	c60691/f2p0/2765
bZIP	13	c50471/f1p0/3164.1.1
bZIP	14	c2757/f1p2/2075
bZIP	15	c32755/f1p5/2631
bZIP	16	c30748/f1p0/3560
bZIP	17	c858/f7p2/1704
bZIP	18	c46131/f1p0/3190
bZIP	19	c17451/f1p0/2130
bZIP	20	c8591/f1p2/1836
bZIP	21	c13026/f6p3/1907
bZIP	22	c8666/f1p0/1901
bZIP	23	c11841/f1p0/2217
bZIP	24	c1122/f5p3/1912
bZIP	25	c34283/f1p0/4722.1
bZIP	26	c52489/f1p0/3464
bZIP	27	c29765/f1p9/2915
bZIP	28	c31176/f1p1/1706
bZIP	29	c20256/f1p0/1890
bZIP	30	c15202/f1p0/7456.1
bZIP	31	c31272/f1p0/3265.1
bZIP	32	c52634/f1p1/3852.1
bZIP	33	c33988/f1p1/1682
bZIP	34	c38066/f1p0/2866
bZIP	35	c26151/f1p0/1834
bZIP	36	c43312/f1p0/2935
bZIP	37	c33928/f1p1/3061
bZIP	38	c1583/f5p0/1798
bZIP	39	c5976/f1p0/1899
bZIP	40	c59109/f1p1/3070
bZIP	41	c43452/f1p1/3050
bZIP	42	c5232/f1p0/1797
bZIP	43	c22116/f1p0/1647
bZIP	44	c34219/f2p2/2733
bZIP	45	c18613/f1p1/2010
bZIP	46	c20411/f1p0/1553
bZIP	47	c32403/f2p0/2607
bZIP	48	c29220/f1p2/2730
bZIP	49	c13951/f2p2/1901
bZIP	50	c44789/f2p0/2969
bZIP	51	c3962/f1p0/1894
bZIP	52	c27463/f2p2/2675
bZIP	53	c30341/f1p0/2382
bZIP	54	c55021/f1p0/2929
bZIP	55	c30456/f1p0/1654
bZIP	56	c15124/f1p0/1601
bZIP	57	c44863/f1p0/2401
bZIP	58	c42992/f1p0/2850
bZIP	59	c16865/f1p0/1848
bZIP	60	c6423/f1p0/1631
bZIP	61	c5382/f1p0/5692.1
bZIP	62	c33711/f1p0/2875
bZIP	63	c29286/f1p0/2038
bZIP	64	c40201/f1p0/2532
bZIP	65	c41131/f1p0/3055
bZIP	66	c57286/f1p0/3095.1
bZIP	67	c49744/f1p0/3504.1
bZIP	68	c8109/f1p1/1588
bZIP	69	c25709/f1p0/2126
bZIP	70	c11938/f1p0/1740
bZIP	71	c60932/f1p0/4080.1
bZIP	72	c11100/f1p0/1782
bZIP	73	c10004/f1p1/1812
bZIP	74	c16263/f1p0/1805
bZIP	75	c4942/f1p0/1659
bZIP	76	c13945/f3p4/1853
bZIP	77	c10792/f1p1/1777
bZIP	78	c20791/f1p1/1624
bZIP	79	c10938/f1p0/1705
bZIP	80	c12575/f1p0/1720
bZIP	81	c12543/f1p0/2186
bZIP	82	c5230/f1p0/1810
bZIP	83	c31736/f1p0/2850.1.1
bZIP	84	c37140/f1p0/2774.2
bZIP	85	c18732/f1p1/1743
bZIP	86	c2924/f2p2/1656
bZIP	87	c1055/f4p1/1959
bZIP	88	c19991/f1p0/1809
bZIP	89	c14159/f1p0/1825
bZIP	90	c16746/f1p0/1517
bZIP	91	c1190/f3p1/1695
bZIP	92	c12269/f3p0/1639
bZIP	93	c24655/f4p1/1651
bZIP	94	c58684/f1p0/2611
bZIP	95	c15085/f1p1/1878
bZIP	96	c44301/f1p2/2635
bZIP	97	c28064/f1p0/3352
bZIP	98	c17231/f2p2/1698
bZIP	99	c51835/f1p0/4064
bZIP	100	c12000/f1p0/1697
