# Supplementary material for: Single-molecule real-time sequencing identifies massive full-length cDNAs and alternative-splicing events that facilitate comparative and functional genomics study in the hexaploid crop sweet potato
Source: PeerJ. 2019 Nov 15;7:e7933. doi: 10.7717/peerj.7933 (PMC6859871; doi:10.7717/peerj.7933)
Supplement: File S11 [file peerj-07-7933-s011.xlsx]

## Sheet: I.batatas
Additional file 11. Information of AS events in Ib53861
Chrom	AS_event	Event_start	Event_end	Strand	Gene_id	Transcript_id
chr1	Intron retention	1007059	1007443	+	chr1:1005249-1008595W	c12686/f1p0/1514,c29282/f1p0/1232
chr1	Mutually exclusive exon	10158520	10158780	+	chr1:10157986-10394293W	c45485/f2p2/3791,c44120/f1p3/3695.1
chr1	Alternative 3' splice site	10158566	10158571	+	chr1:10157986-10394293W	c56062/f1p0/4037,c53973/f1p0/4162
chr1	Exon skipping	10159350	10159379	+	chr1:10157986-10394293W	c43736/f1p0/3920.1,c53973/f1p0/4162,c56062/f1p0/4037,c57390/f1p0/3999.1,c60748/f1p0/3740,c61611/f1p0/3748.1,c62706/f1p0/3782
chr1	Mutually exclusive exon	10159350	10164880	+	chr1:10157986-10394293W	c56266/f1p1/3793.1,c43736/f1p0/3920.1,c53973/f1p0/4162,c56062/f1p0/4037,c57390/f1p0/3999.1
chr1	Exon skipping	10164850	10164880	+	chr1:10157986-10394293W	c56266/f1p1/3793.1,c60748/f1p0/3740,c62706/f1p0/3782
chr1	Alternative 3' splice site	10165714	10165736	+	chr1:10157986-10394293W	c60748/f1p0/3740,c61611/f1p0/3748.1
chr1	Alternative 3' splice site	10211044	10211045	+	chr1:10157986-10394293W	c50281/f1p0/3878,c44120/f1p3/3695.1
chr1	Alternative 5' splice site	10247153	10247154	+	chr1:10157986-10394293W	c43736/f1p0/3920.1,c44120/f1p3/3695.1,c60748/f1p0/3740
chr1	Mutually exclusive exon	10342837	10349811	+	chr1:10157986-10394293W	c62706/f1p0/3782,c60748/f1p0/3740
chr1	Intron retention	10388800	10388832	+	chr1:10157986-10394293W	c54621/f1p1/3661.1,c61611/f1p0/3748.1
chr1	Alternative 3' splice site	10392066	10392079	+	chr1:10157986-10394293W	c14250/f2p0/2786,c44120/f1p3/3695.1
chr1	Intron retention	10736900	10736805	-	chr1:10735615-10741086C	c57347/f1p0/3715,c30645/f2p2/2831,c53135/f1p0/3870.1
chr1	Intron retention	12083746	12083650	-	chr1:12082170-12100104C	c56317/f2p1/3741,c62538/f1p0/3438.1
chr1	Intron retention	12175926	12176072	+	chr1:12174154-12178984W	c47027/f1p1/2962,c19959/f1p1/3089,c30319/f1p4/2888,c36088/f1p0/3737,c48249/f1p0/2994,c63769/f2p6/2927,c63869/f3p6/2820
chr1	Intron retention	12334313	12334225	-	chr1:12332337-12338869C	c29339/f1p0/3162,c42412/f1p1/3879,c59198/f1p0/3840,c13458/f1p4/3081,c13527/f4p4/3101,c23479/f1p2/2001,c24975/f3p4/3077,c27698/f3p0/3097,c29423/f1p0/3424.1,c31902/f1p4/3018,c36113/f11p4/3127,c39670/f1p2/3017
chr1	Intron retention	12335119	12335034	-	chr1:12332337-12338869C	c59198/f1p0/3840,c13527/f4p4/3101,c23479/f1p2/2001,c24975/f3p4/3077,c27698/f3p0/3097,c29339/f1p0/3162,c29423/f1p0/3424.1,c31902/f1p4/3018,c36113/f11p4/3127
chr1	Alternative 3' splice site	12335212	12335199	-	chr1:12332337-12338869C	c39670/f1p2/3017,c13458/f1p4/3081
chr1	Alternative 3' splice site	12335253	12335199	-	chr1:12332337-12338869C	c13527/f4p4/3101,c19437/f2p1/2686,c23479/f1p2/2001,c24975/f3p4/3077,c27698/f3p0/3097,c29339/f1p0/3162,c29423/f1p0/3424.1,c31902/f1p4/3018,c36113/f11p4/3127,c13458/f1p4/3081
chr1	Alternative 3' splice site	12335253	12335212	-	chr1:12332337-12338869C	c13527/f4p4/3101,c19437/f2p1/2686,c23479/f1p2/2001,c24975/f3p4/3077,c27698/f3p0/3097,c29339/f1p0/3162,c29423/f1p0/3424.1,c31902/f1p4/3018,c36113/f11p4/3127,c39670/f1p2/3017
chr1	Intron retention	12335808	12335034	-	chr1:12332337-12338869C	c42412/f1p1/3879,c13458/f1p4/3081
chr1	Intron retention	12335808	12335034	-	chr1:12332337-12338869C	c42412/f1p1/3879,c39670/f1p2/3017
chr1	Intron retention	12335808	12335034	-	chr1:12332337-12338869C	c42412/f1p1/3879,c13527/f4p4/3101,c24975/f3p4/3077,c27698/f3p0/3097,c29339/f1p0/3162,c29423/f1p0/3424.1,c31902/f1p4/3018,c36113/f11p4/3127
chr1	Intron retention	12336019	12335879	-	chr1:12332337-12338869C	c59198/f1p0/3840,c13458/f1p4/3081,c13527/f4p4/3101,c19437/f2p1/2686,c24975/f3p4/3077,c27698/f3p0/3097,c29339/f1p0/3162,c29423/f1p0/3424.1,c31902/f1p4/3018,c36113/f11p4/3127,c39670/f1p2/3017
chr1	Intron retention	12337093	12336461	-	chr1:12332337-12338869C	c59198/f1p0/3840,c13458/f1p4/3081,c13527/f4p4/3101,c24975/f3p4/3077,c27698/f3p0/3097,c29339/f1p0/3162,c31902/f1p4/3018,c36113/f11p4/3127,c39670/f1p2/3017,c42412/f1p1/3879
chr1	Exon skipping	12337254	12336390	-	chr1:12332337-12338869C	c19437/f2p1/2686,c29423/f1p0/3424.1,c59198/f1p0/3840
chr1	Exon skipping	12337254	12336390	-	chr1:12332337-12338869C	c19437/f2p1/2686,c29423/f1p0/3424.1,c13458/f1p4/3081,c13527/f4p4/3101,c24975/f3p4/3077,c27698/f3p0/3097,c29339/f1p0/3162,c31902/f1p4/3018,c36113/f11p4/3127,c39670/f1p2/3017,c42412/f1p1/3879
chr1	Intron retention	12338709	12338690	-	chr1:12332337-12338869C	c19437/f2p1/2686,c29339/f1p0/3162,c62538/f1p0/3438.2
chr1	Intron retention	12338709	12338690	-	chr1:12332337-12338869C	c13458/f1p4/3081,c59198/f1p0/3840
chr1	Alternative 5' splice site	12420978	12421833	+	chr1:12420761-12426247W	c13779/f23p8/3086,c36103/f3p2/3148,c51580/f1p8/3866
chr1	Alternative 5' splice site	13663886	13663873	-	chr1:13658236-13669168C	c16448/f1p1/2931,c41111/f1p1/2915,c59837/f1p1/3654,c62203/f1p0/3781,c59806/f1p0/3620
chr1	Alternative 3' splice site	15202618	15202643	+	chr1:15197318-15692973W	c35846/f2p0/3370,c44218/f1p0/3543,c47330/f1p0/3090,c48308/f1p0/3569,c52393/f1p0/3448.1,c53622/f1p0/3717.1,c61824/f1p0/3802.1,c16275/f1p0/3318,c61794/f1p0/3520
chr1	Intron retention	15207781	15207874	+	chr1:15197318-15692973W	c61794/f1p0/3520,c16275/f1p0/3318,c44218/f1p0/3543
chr1	Intron retention	15220323	15219740	-	chr1:15216124-15648081C	c20384/f1p0/3017,c55526/f1p0/3905,c14826/f1p0/3520,c51630/f1p0/3450
chr1	Intron retention	15220588	15220481	-	chr1:15216124-15648081C	c14826/f1p0/3520,c51630/f1p0/3450,c34801/f1p0/3373,c51982/f1p0/3908.1
chr1	Intron retention	15220588	15219740	-	chr1:15216124-15648081C	c20384/f1p0/3017,c55526/f1p0/3905,c34801/f1p0/3373,c51982/f1p0/3908.1
chr1	Mutually exclusive exon	15222196	15221847	-	chr1:15216124-15648081C	c55526/f1p0/3905,c14826/f1p0/3520,c51630/f1p0/3450
chr1	Intron retention	15220323	15219740	-	chr1:15216587-15350869C	c61693/f1p0/4136,c33501/f1p0/3391,c57746/f1p0/3553
chr1	Alternative 3' splice site	15258269	15259000	+	chr1:15241292-15262672W	c49654/f2p2/3753,c60166/f1p1/3820,c17306/f2p4/3008,c22050/f1p0/2946,c32384/f1p0/2738,c34007/f1p1/2978,c34108/f1p0/3126,c42543/f1p2/2814,c46731/f1p4/3102
chr1	Alternative 3' splice site	15658459	15658011	-	chr1:15633947-15664431C	c60355/f1p1/3848,c36602/f1p2/3448
chr1	Intron retention	15658579	15658011	-	chr1:15633947-15664431C	c35483/f1p1/3085,c55033/f1p1/3980,c36602/f1p2/3448
chr1	Intron retention	15658579	15658459	-	chr1:15633947-15664431C	c35483/f1p1/3085,c55033/f1p1/3980,c60355/f1p1/3848
chr1	Alternative 5' splice site	15658709	15658579	-	chr1:15633947-15664431C	c21826/f1p2/3375,c36602/f1p2/3448
chr1	Intron retention	15658709	15658011	-	chr1:15633947-15664431C	c35483/f1p1/3085,c55033/f1p1/3980,c21826/f1p2/3375
chr1	Intron retention	16137601	16136764	-	chr1:16133346-16138905C	c40383/f1p1/2729,c10703/f1p1/1883,c5093/f1p1/2033
chr1	Intron retention	16205241	16205351	+	chr1:16161446-16477704W	c15326/f1p0/1723,c24469/f1p0/1709,c3977/f1p0/1763,c5003/f2p0/1606
chr1	Intron retention	16243233	16243362	+	chr1:16237499-16244483W	c20186/f1p1/1684,c8380/f1p2/1539
chr1	Intron retention	16562586	16563043	+	chr1:16561672-16566100W	c30097/f2p1/3287,c51946/f1p0/3622.1,c60247/f1p2/3110
chr1	Intron retention	16562586	16563766	+	chr1:16561672-16566100W	c40243/f1p0/3966,c60247/f1p2/3110
chr1	Intron retention	16563571	16563766	+	chr1:16561672-16566100W	c40243/f1p0/3966,c30097/f2p1/3287,c51946/f1p0/3622.1
chr1	Intron retention	16564836	16564940	+	chr1:16561672-16566100W	c16166/f1p1/2563,c57645/f1p1/3613.1,c30097/f2p1/3287,c39827/f1p2/3227.1,c60247/f1p2/3110
chr1	Intron retention	17016562	17016372	-	chr1:17012261-17018886C	c34371/f1p0/3686.2.1,c7493/f1p0/1844,c6008/f1p1/1864
chr1	Intron retention	17145724	17144611	-	chr1:17141875-17146115C	c43213/f1p1/3239,c18228/f1p0/2199
chr1	Exon skipping	17159851	17159793	-	chr1:17157532-17160129C	c4914/f1p0/1444,c3635/f1p0/1485
chr1	Intron retention	17244647	17242246	-	chr1:17240537-17718321C	c42103/f5p2/3875,c12269/f1p0/1609,c18066/f1p1/1675
chr1	Alternative 3' splice site	17380860	17380938	+	chr1:17379207-17382966W	c21823/f1p0/3092,c13687/f11p4/3091,c13848/f8p2/3226,c19570/f1p0/2866,c27305/f2p2/3206,c29752/f1p0/3128,c32219/f1p0/3443,c33020/f1p2/3142,c33480/f1p1/2928,c34550/f1p0/3394.1,c43097/f1p0/3212,c47137/f1p1/3226,c61603/f1p0/3511
chr1	Alternative 3' splice site	17623975	17624021	+	chr1:17623693-17628746W	c41703/f1p0/2774,c34810/f1p0/2810
chr1	Intron retention	17624664	17625022	+	chr1:17623693-17628746W	c34810/f1p0/2810,c41703/f1p0/2774
chr1	Exon skipping	18180086	18180150	+	chr1:18176623-18267768W	c31909/f1p0/3191,c31915/f1p0/3035
chr1	Alternative 3' splice site	18180697	18180776	+	chr1:18176623-18267768W	c46949/f1p0/3065,c21602/f2p0/3164,c47934/f1p0/3078
chr1	Alternative 3' splice site	18180697	18180704	+	chr1:18176623-18267768W	c46949/f1p0/3065,c31915/f1p0/3035
chr1	Alternative 3' splice site	18180704	18180776	+	chr1:18176623-18267768W	c31915/f1p0/3035,c21602/f2p0/3164,c47934/f1p0/3078
chr1	Exon skipping	18180998	18181111	+	chr1:18176623-18267768W	c31915/f1p0/3035,c21602/f2p0/3164,c31909/f1p0/3191,c46949/f1p0/3065,c47934/f1p0/3078
chr1	Alternative 5' splice site	18389270	18389269	-	chr1:18387820-18393512C	c55807/f1p0/3237,c21845/f1p0/2884
chr1	Alternative 3' splice site	18391636	18391374	-	chr1:18387820-18393512C	c29399/f1p0/3048,c31628/f1p0/3128.1
chr1	Intron retention	18391781	18391374	-	chr1:18387820-18393512C	c34720/f1p0/3536,c31628/f1p0/3128.1
chr1	Alternative 3' splice site	18622467	18622482	+	chr1:18619814-18624628W	c5957/f1p0/1763,c7903/f1p0/1749,c28000/f1p1/9012.3.1
chr1	Intron retention	19309950	19310035	+	chr1:19308243-19313401W	c29445/f1p0/2930,c14752/f4p2/2857,c28466/f1p0/2775,c40472/f1p0/3031,c41540/f1p0/3182,c44677/f1p1/2579,c46825/f2p2/2665
chr1	Intron retention	19310104	19310246	+	chr1:19308243-19313401W	c33617/f1p0/3040,c14752/f4p2/2857,c28466/f1p0/2775,c40472/f1p0/3031,c41540/f1p0/3182,c44677/f1p1/2579,c46825/f2p2/2665
chr1	Alternative 3' splice site	19878964	19878977	+	chr1:19876050-19881664W	c33929/f1p1/2989,c56985/f1p2/3907,c31485/f1p1/3358,c43588/f1p1/3194
chr1	Intron retention	19910239	19910149	-	chr1:19904796-19914641C	c48049/f1p4/3813,c55636/f1p0/3960.1,c38531/f3p2/3763,c44851/f1p3/3624,c52857/f1p1/3657,c54502/f1p2/3819,c57862/f8p8/3796
chr1	Alternative 3' splice site	19912683	19912679	-	chr1:19904796-19914641C	c44851/f1p3/3624,c48049/f1p4/3813,c52857/f1p1/3657,c54502/f1p2/3819,c55636/f1p0/3960.2,c57862/f8p8/3796,c38531/f3p2/3763
chr1	Intron retention	20113155	20113682	+	chr1:20111641-20117249W	c53569/f1p0/3673,c17836/f1p0/3134,c18765/f2p1/3228,c19154/f2p0/3103,c25224/f1p0/2809
chr1	Exon skipping	20309468	20309561	+	chr1:20309127-20480405W	c14399/f7p1/3139,c25430/f1p1/3272,c47503/f1p1/3147,c56964/f1p0/3312.2,c30251/f1p1/3101
chr1	Exon skipping	20309468	20310327	+	chr1:20309127-20480405W	c28469/f1p1/2595,c30251/f1p1/3101
chr1	Alternative 3' splice site	20309795	20309803	+	chr1:20309127-20480405W	c15614/f1p0/10136.1,c17232/f2p0/3118,c24255/f2p1/3134,c47778/f1p0/3260,c53990/f1p1/3400
chr1	Exon skipping	20309803	20310327	+	chr1:20309127-20480405W	c28469/f1p1/2595,c14399/f7p1/3139,c25430/f1p1/3272,c47503/f1p1/3147,c56964/f1p0/3312.2
chr1	Intron retention	20312633	20312782	+	chr1:20309127-20480405W	c25430/f1p1/3272,c14399/f7p1/3139,c15614/f1p0/10136.1,c17232/f2p0/3118,c24255/f2p1/3134,c28469/f1p1/2595,c30251/f1p1/3101,c36466/f1p0/2764,c44680/f1p0/3281,c47503/f1p1/3147,c47778/f1p0/3260,c52908/f1p0/3380,c53990/f1p1/3400
chr1	Alternative 3' splice site	20390432	20390423	-	chr1:20386840-20393006C	c19203/f1p0/2643,c29852/f1p1/2903
chr1	Intron retention	20390537	20390432	-	chr1:20386840-20393006C	c17092/f4p4/3100,c17996/f2p2/3146,c27425/f1p0/2621,c31653/f1p0/5662.1,c33405/f1p0/2940,c43587/f1p2/2948,c45616/f1p0/2546,c63287/f1p1/2745,c19203/f1p0/2643
chr1	Intron retention	20390537	20390423	-	chr1:20386840-20393006C	c17092/f4p4/3100,c17996/f2p2/3146,c27425/f1p0/2621,c31653/f1p0/5662.1,c33405/f1p0/2940,c43587/f1p2/2948,c45616/f1p0/2546,c63287/f1p1/2745,c29852/f1p1/2903
chr1	Intron retention	20391617	20391536	-	chr1:20386840-20393006C	c19203/f1p0/2643,c17092/f4p4/3100,c17996/f2p2/3146,c27425/f1p0/2621,c29852/f1p1/2903,c31653/f1p0/5662.1,c33405/f1p0/2940,c43587/f1p2/2948,c45616/f1p0/2546,c63287/f1p1/2745
chr1	Alternative 5' splice site	20392074	20391994	-	chr1:20386840-20393006C	c17092/f4p4/3100,c19203/f1p0/2643,c27425/f1p0/2621,c29852/f1p1/2903,c31653/f1p0/5662.1,c43587/f1p2/2948,c63287/f1p1/2745,c17996/f2p2/3146,c33405/f1p0/2940,c45616/f1p0/2546
chr1	Alternative 3' splice site	20392722	20392712	-	chr1:20386840-20393006C	c33405/f1p0/2940,c29852/f1p1/2903,c31653/f1p0/5662.1,c43587/f1p2/2948
chr1	Intron retention	20601398	20601287	-	chr1:20598280-20726514C	c23334/f1p2/3283.1,c20479/f1p0/2868.1,c20585/f1p3/3091,c22263/f1p1/2792,c24275/f1p1/3049,c45577/f1p1/2711,c47843/f1p2/2636
chr1	Exon skipping	20601912	20601847	-	chr1:20598280-20726514C	c20479/f1p0/2868.1,c20585/f1p3/3091,c22263/f1p1/2792,c23334/f1p2/3283.1,c24275/f1p1/3049,c45577/f1p1/2711,c47843/f1p2/2636
chr1	Intron retention	20602428	20602405	-	chr1:20598280-20726514C	c22263/f1p1/2792,c23334/f1p2/3283.1,c24275/f1p1/3049,c20479/f1p0/2868.1,c20585/f1p3/3091
chr1	Intron retention	20725652	20725543	-	chr1:20598280-20726514C	c9160/f2p0/2153,c12802/f2p0/1946,c2327/f2p0/2057
chr1	Intron retention	20818516	20818599	+	chr1:20814847-20824276W	c44491/f1p1/3718,c51586/f1p0/3839.1,c54620/f1p0/4007,c55945/f1p0/4445,c61188/f1p0/3791.1,c60671/f1p0/3660
chr1	Intron retention	20819817	20819938	+	chr1:20814847-20824276W	c56979/f1p0/3925,c60379/f1p0/3643
chr1	Alternative 3' splice site	20819938	20819940	+	chr1:20814847-20824276W	c40202/f1p0/3725,c44491/f1p1/3718,c50832/f1p0/3690,c51586/f1p0/3839.1,c52390/f1p0/3554,c54424/f1p0/3806,c54620/f1p0/4007,c55406/f1p0/3744,c55945/f1p0/4445,c60379/f1p0/3643,c60671/f1p0/3660,c61188/f1p0/3791.1,c40848/f1p0/3717
chr1	Exon skipping	20821431	20821543	+	chr1:20814847-20824276W	c40202/f1p0/3725,c40848/f1p0/3717,c44491/f1p1/3718,c50832/f1p0/3690,c51586/f1p0/3839.1,c52390/f1p0/3554,c54424/f1p0/3806,c54620/f1p0/4007,c55406/f1p0/3744,c55945/f1p0/4445,c56979/f1p0/3925,c60379/f1p0/3643,c61188/f1p0/3791.1,c60671/f1p0/3660
chr1	Intron retention	20821699	20821809	+	chr1:20814847-20824276W	c51586/f1p0/3839.1,c40202/f1p0/3725,c40848/f1p0/3717
chr1	Intron retention	20821699	20821772	+	chr1:20814847-20824276W	c51586/f1p0/3839.1,c44491/f1p1/3718,c50832/f1p0/3690,c52390/f1p0/3554,c54424/f1p0/3806,c55406/f1p0/3744,c55945/f1p0/4445,c56979/f1p0/3925,c60379/f1p0/3643,c60671/f1p0/3660,c61188/f1p0/3791.1
chr1	Alternative 3' splice site	20821772	20821809	+	chr1:20814847-20824276W	c44491/f1p1/3718,c50832/f1p0/3690,c52390/f1p0/3554,c54424/f1p0/3806,c55406/f1p0/3744,c55945/f1p0/4445,c56979/f1p0/3925,c60379/f1p0/3643,c60671/f1p0/3660,c61188/f1p0/3791.1,c40202/f1p0/3725,c40848/f1p0/3717
chr1	Intron retention	20821867	20822134	+	chr1:20814847-20824276W	c54620/f1p0/4007,c44491/f1p1/3718,c50832/f1p0/3690,c52390/f1p0/3554,c54424/f1p0/3806,c55406/f1p0/3744,c55945/f1p0/4445,c56979/f1p0/3925,c60379/f1p0/3643,c60671/f1p0/3660,c61188/f1p0/3791.1
chr1	Intron retention	20822698	20822782	+	chr1:20814847-20824276W	c40848/f1p0/3717,c50832/f1p0/3690,c40202/f1p0/3725,c44491/f1p1/3718,c52390/f1p0/3554,c54424/f1p0/3806,c54620/f1p0/4007,c55406/f1p0/3744,c55945/f1p0/4445,c56979/f1p0/3925,c60379/f1p0/3643,c60671/f1p0/3660,c61188/f1p0/3791.1
chr1	Intron retention	20823697	20823800	+	chr1:20814847-20824276W	c55406/f1p0/3744,c40848/f1p0/3717,c44491/f1p1/3718,c52390/f1p0/3554,c54620/f1p0/4007,c60379/f1p0/3643,c60671/f1p0/3660
chr1	Intron retention	20823697	20823790	+	chr1:20814847-20824276W	c55406/f1p0/3744,c54424/f1p0/3806
chr1	Alternative 3' splice site	20823790	20823800	+	chr1:20814847-20824276W	c54424/f1p0/3806,c40848/f1p0/3717,c44491/f1p1/3718,c52390/f1p0/3554,c54620/f1p0/4007,c60379/f1p0/3643,c60671/f1p0/3660
chr1	Intron retention	20823847	20823947	+	chr1:20814847-20824276W	c51586/f1p0/3839.2,c40848/f1p0/3717
chr1	Alternative 3' splice site	20823930	20823947	+	chr1:20814847-20824276W	c60671/f1p0/3660,c55406/f1p0/3744
chr1	Alternative 3' splice site	20823930	20823947	+	chr1:20814847-20824276W	c44491/f1p1/3718,c54620/f1p0/4007
chr1	Alternative 3' splice site	20853591	20853720	+	chr1:20847722-20983742W	c52650/f1p0/3355,c44314/f1p0/3946
chr1	Intron retention	20854203	20854757	+	chr1:20847722-20983742W	c44314/f1p0/3946,c52650/f1p0/3355
chr1	Alternative 3' splice site	20982708	20982855	+	chr1:20847722-20983742W	c54602/f1p0/3667,c44314/f1p0/3946,c52650/f1p0/3355
chr1	Intron retention	20869078	20869182	+	chr1:20867239-21008903W	c11330/f1p0/1948,c16362/f1p1/1869,c1740/f2p1/2011
chr1	Alternative 3' splice site	20871257	20871260	+	chr1:20867239-21008903W	c11330/f1p0/1948,c16362/f1p1/1869
chr1	Alternative 3' splice site	2097451	2097435	-	chr1:2091846-2099393C	c14532/f3p0/2669,c40278/f1p0/2707
chr1	Intron retention	21693208	21693078	-	chr1:21691920-21706978C	c21528/f1p0/3068,c32251/f1p1/3436,c44033/f1p0/3801.1,c49945/f3p1/3693,c52647/f1p0/3430,c56898/f1p0/3745
chr1	Exon skipping	21694370	21694270	-	chr1:21691920-21706978C	c44033/f1p0/3801.1,c21528/f1p0/3068,c32251/f1p1/3436,c49945/f3p1/3693,c52647/f1p0/3430,c56898/f1p0/3745
chr1	Alternative 5' splice site	21701753	21701616	-	chr1:21691920-21706978C	c21528/f1p0/3068,c32251/f1p1/3436,c44033/f1p0/3801.1,c49945/f3p1/3693,c56898/f1p0/3745,c52647/f1p0/3430
chr1	Intron retention	21714599	21714527	-	chr1:21713474-21717171C	c9906/f1p0/2001,c2237/f2p0/1913,c35895/f1p0/2391,c4991/f1p0/1888
chr1	Intron retention	21715841	21715504	-	chr1:21713474-21717171C	c35895/f1p0/2391,c2237/f2p0/1913,c4991/f1p0/1888,c9906/f1p0/2001
chr1	Intron retention	21716393	21716151	-	chr1:21713474-21717171C	c35895/f1p0/2391,c2237/f2p0/1913,c4991/f1p0/1888,c9906/f1p0/2001
chr1	Alternative 5' splice site	21721003	21720981	-	chr1:21719554-21726119C	c10592/f1p0/2207,c9342/f1p0/2269,c17323/f1p0/2244
chr1	Intron retention	21723875	21723756	-	chr1:21719554-21726119C	c9342/f1p0/2269,c17323/f1p0/2244
chr1	Alternative 5' splice site	21723888	21723875	-	chr1:21719554-21726119C	c10592/f1p0/2207,c17323/f1p0/2244
chr1	Intron retention	21723888	21723756	-	chr1:21719554-21726119C	c9342/f1p0/2269,c10592/f1p0/2207
chr1	Intron retention	21825437	21826529	+	chr1:21823875-21885602W	c22138/f1p1/2757,c3763/f2p1/1994
chr1	Intron retention	21825437	21826371	+	chr1:21823875-21885602W	c22138/f1p1/2757,c3230/f1p1/2040
chr1	Intron retention	21825437	21826529	+	chr1:21823875-21885602W	c22138/f1p1/2757,c41868/f1p1/2105,c9149/f1p1/2099
chr1	Alternative 3' splice site	21826371	21826373	+	chr1:21823875-21885602W	c41868/f1p1/2105,c9149/f1p1/2099,c3763/f2p1/1994
chr1	Intron retention	21826447	21826529	+	chr1:21823875-21885602W	c3230/f1p1/2040,c41868/f1p1/2105,c9149/f1p1/2099
chr1	Intron retention	21842318	21842213	-	chr1:21836983-21898135C	c41375/f1p0/2917.2,c20709/f1p0/2901.2,c50734/f1p0/3720
chr1	Intron retention	21919867	21920094	+	chr1:21919785-21927900W	c40422/f1p0/3514,c49863/f2p1/3769,c62695/f1p0/3736,c19111/f1p1/3230,c51521/f1p2/3751,c52200/f1p1/3850
chr1	Alternative 3' splice site	21920007	21920094	+	chr1:21919785-21927900W	c47160/f1p0/3583,c19111/f1p1/3230,c23190/f2p0/3220,c51504/f1p0/3609,c51521/f1p2/3751,c52200/f1p1/3850,c57066/f1p3/4237
chr1	Intron retention	21921908	21922265	+	chr1:21919785-21927900W	c51504/f1p0/3609,c51521/f1p2/3751,c54552/f1p1/3977,c55994/f1p1/3968,c16191/f1p0/3193,c19111/f1p1/3230,c23190/f2p0/3220,c31211/f1p0/3057,c33549/f2p0/3601,c40422/f1p0/3514,c47160/f1p0/3583,c49863/f2p1/3769,c57355/f1p0/3456,c62695/f1p0/3736
chr1	Intron retention	21921908	21922265	+	chr1:21919785-21927900W	c57066/f1p3/4237,c52200/f1p1/3850
chr1	Intron retention	21921908	21923113	+	chr1:21919785-21927900W	c57066/f1p3/4237,c16191/f1p0/3193,c19111/f1p1/3230
chr1	Intron retention	21921908	21923113	+	chr1:21919785-21927900W	c57066/f1p3/4237,c23190/f2p0/3220,c31211/f1p0/3057,c33549/f2p0/3601,c40422/f1p0/3514
chr1	Intron retention	21921908	21922846	+	chr1:21919785-21927900W	c57066/f1p3/4237,c57355/f1p0/3456,c62695/f1p0/3736
chr1	Intron retention	21921908	21922697	+	chr1:21919785-21927900W	c57066/f1p3/4237,c47160/f1p0/3583,c49863/f2p1/3769
chr1	Intron retention	21922341	21923113	+	chr1:21919785-21927900W	c52200/f1p1/3850,c16191/f1p0/3193,c19111/f1p1/3230
chr1	Intron retention	21922341	21923113	+	chr1:21919785-21927900W	c52200/f1p1/3850,c23190/f2p0/3220,c31211/f1p0/3057,c33549/f2p0/3601,c40422/f1p0/3514
chr1	Intron retention	21922341	21922846	+	chr1:21919785-21927900W	c52200/f1p1/3850,c57355/f1p0/3456,c62695/f1p0/3736
chr1	Intron retention	21922341	21922697	+	chr1:21919785-21927900W	c52200/f1p1/3850,c47160/f1p0/3583,c49863/f2p1/3769
chr1	Intron retention	21922341	21923113	+	chr1:21919785-21927900W	c57066/f1p3/4237,c51504/f1p0/3609
chr1	Intron retention	21922341	21922846	+	chr1:21919785-21927900W	c57066/f1p3/4237,c51521/f1p2/3751,c54552/f1p1/3977
chr1	Intron retention	21922341	21923113	+	chr1:21919785-21927900W	c57066/f1p3/4237,c55994/f1p1/3968
chr1	Alternative 3' splice site	21922697	21922846	+	chr1:21919785-21927900W	c55994/f1p1/3968,c23190/f2p0/3220,c31211/f1p0/3057,c33549/f2p0/3601,c40422/f1p0/3514,c51504/f1p0/3609
chr1	Mutually exclusive exon	21922697	21922967	+	chr1:21919785-21927900W	c55994/f1p1/3968,c16191/f1p0/3193,c19111/f1p1/3230
chr1	Alternative 3' splice site	21922697	21922846	+	chr1:21919785-21927900W	c47160/f1p0/3583,c49863/f2p1/3769,c51521/f1p2/3751,c54552/f1p1/3977,c57355/f1p0/3456,c62695/f1p0/3736
chr1	Alternative 5' splice site	21922967	21923033	+	chr1:21919785-21927900W	c16191/f1p0/3193,c19111/f1p1/3230,c23190/f2p0/3220,c31211/f1p0/3057,c33549/f2p0/3601,c40422/f1p0/3514,c51504/f1p0/3609
chr1	Intron retention	21922967	21923113	+	chr1:21919785-21927900W	c51521/f1p2/3751,c54552/f1p1/3977,c57355/f1p0/3456,c62695/f1p0/3736,c16191/f1p0/3193,c19111/f1p1/3230
chr1	Intron retention	21923033	21923113	+	chr1:21919785-21927900W	c51521/f1p2/3751,c54552/f1p1/3977,c57355/f1p0/3456,c62695/f1p0/3736,c23190/f2p0/3220,c31211/f1p0/3057,c33549/f2p0/3601,c40422/f1p0/3514,c51504/f1p0/3609
chr1	Intron retention	21923033	21923113	+	chr1:21919785-21927900W	c47160/f1p0/3583,c49863/f2p1/3769,c55994/f1p1/3968
chr1	Intron retention	21923819	21923954	+	chr1:21919785-21927900W	c33549/f2p0/3601,c54552/f1p1/3977,c62695/f1p0/3736,c16191/f1p0/3193,c19111/f1p1/3230,c23190/f2p0/3220,c31211/f1p0/3057,c40422/f1p0/3514,c47160/f1p0/3583,c49863/f2p1/3769,c51504/f1p0/3609,c51521/f1p2/3751,c52200/f1p1/3850,c55994/f1p1/3968,c57066/f1p3/4237,c57355/f1p0/3456
chr1	Alternative 5' splice site	21926664	21926681	+	chr1:21919785-21927900W	c40422/f1p0/3514,c55994/f1p1/3968,c16191/f1p0/3193,c19111/f1p1/3230,c23190/f2p0/3220,c33549/f2p0/3601,c47160/f1p0/3583,c49863/f2p1/3769,c51504/f1p0/3609,c51521/f1p2/3751,c52200/f1p1/3850,c54552/f1p1/3977,c57066/f1p3/4237,c57355/f1p0/3456,c62695/f1p0/3736
chr1	Intron retention	21921908	21923113	+	chr1:21920112-21927900W	c54862/f1p3/4046,c35918/f1p0/2815,c44724/f1p0/2884
chr1	Alternative 5' splice site	21926664	21926681	+	chr1:21920112-21927900W	c44724/f1p0/2884,c35918/f1p0/2815,c54862/f1p3/4046
chr1	Alternative 3' splice site	21947157	21947158	+	chr1:21945463-21950479W	c14915/f1p0/2713,c26916/f3p4/3034,c40044/f1p4/2797,c28399/f1p3/2889
chr1	Alternative 5' splice site	21999135	21999229	+	chr1:21997191-22003545W	c51472/f1p1/3971.1,c49317/f6p6/4216,c60776/f1p0/3472,c62025/f1p6/3966
chr1	Intron retention	22423919	22423993	+	chr1:22423047-22426785W	c52166/f1p0/3582.1,c48020/f1p1/3171.1
chr1	Intron retention	22424751	22425078	+	chr1:22423047-22426785W	c33181/f1p0/3282,c52166/f1p0/3582.3,c48020/f1p1/3171.1
chr1	Intron retention	22435586	22435205	-	chr1:22433783-22494658C	c17916/f1p1/2886,c22659/f1p0/2685.1,c33826/f1p0/2470
chr1	Intron retention	23062511	23062401	-	chr1:23060483-23064357C	c43407/f1p0/2550,c43812/f1p0/3764.1,c46560/f1p0/2887,c10097/f1p0/2171,c38420/f2p0/2641
chr1	Alternative 5' splice site	23119350	23119324	-	chr1:23115565-23208045C	c2096/f2p0/2122,c4481/f1p0/2557
chr1	Intron retention	2333516	2333007	-	chr1:2332189-2338383C	c51934/f1p0/3898,c53612/f1p1/3845.1,c13118/f1p0/1785,c1617/f2p1/1836
chr1	Intron retention	2335236	2333878	-	chr1:2332189-2338383C	c51934/f1p0/3898,c52403/f1p1/3753,c53612/f1p1/3845.1,c13118/f1p0/1785,c1617/f2p1/1836
chr1	Alternative 5' splice site	23578759	23578760	+	chr1:23574441-23584677W	c19721/f1p2/2792,c16991/f6p2/2929
chr1	Alternative 3' splice site	23583171	23583187	+	chr1:23574441-23584677W	c16991/f6p2/2929,c17921/f2p0/3067,c19721/f1p2/2792,c36387/f1p0/2840,c45005/f1p0/3806.2,c47548/f1p1/3185.2,c48099/f1p0/3059
chr1	Alternative 3' splice site	23584253	23584256	+	chr1:23574441-23584677W	c16991/f6p2/2929,c48099/f1p0/3059
chr1	Alternative 5' splice site	23829165	23829113	-	chr1:23828627-23835157C	c3858/f1p0/1947,c481/f12p3/2065,c9202/f1p3/1932
chr1	Intron retention	23864481	23864198	-	chr1:23861459-23866835C	c50561/f1p1/3471,c53342/f1p1/3562,c10741/f1p0/2221,c26995/f2p0/3222,c35532/f1p1/3257,c35799/f1p0/2990
chr1	Intron retention	24230744	24230822	+	chr1:24228944-24232617W	c43268/f1p0/2836,c48508/f1p0/2670
chr1	Alternative 3' splice site	24360903	24360967	+	chr1:24356092-24365164W	c36117/f1p2/3305,c48124/f1p2/3411,c49491/f3p2/3783,c49530/f5p6/3790,c53231/f1p1/3941.1,c54505/f1p1/3872,c60561/f1p0/3687
chr1	Alternative 3' splice site	24714323	24714317	-	chr1:24713077-24719728C	c20957/f1p1/3059,c24134/f1p5/3140,c36711/f1p1/3284,c44194/f1p1/2930,c56413/f1p5/3762,c6138/f1p0/2021,c32907/f1p7/3309
chr1	Alternative 3' splice site	24717810	24717090	-	chr1:24713077-24719728C	c56413/f1p5/3762,c24134/f1p5/3140,c32907/f1p7/3309,c44194/f1p1/2930
chr1	Exon skipping	24717823	24717630	-	chr1:24713077-24719728C	c24134/f1p5/3140,c32907/f1p7/3309,c44194/f1p1/2930,c36711/f1p1/3284
chr1	Intron retention	24765063	24764971	-	chr1:24762984-24768960C	c5853/f1p0/1881,c11036/f1p0/1777
chr1	Intron retention	24767488	24767321	-	chr1:24762984-24768960C	c5853/f1p0/1881,c11036/f1p0/1777
chr1	Intron retention	24904768	24904557	-	chr1:24776717-24908096C	c4559/f1p1/2091,c11698/f4p3/1913,c2661/f2p2/1951
chr1	Alternative 3' splice site	24863780	24863785	+	chr1:24862668-24869774W	c36225/f1p0/2946,c3868/f1p0/2211
chr1	Intron retention	24868935	24869020	+	chr1:24862668-24869774W	c3978/f1p0/10195.1,c19457/f1p0/2524,c3868/f1p0/2211
chr1	Alternative 3' splice site	25057338	25057342	+	chr1:25056787-25059695W	c6443/f1p1/1668,c2622/f2p1/1830
chr1	Intron retention	25253921	25253686	-	chr1:25243778-25362321C	c15100/f1p0/2877,c18687/f2p3/2562
chr1	Intron retention	25254284	25254002	-	chr1:25243778-25362321C	c26738/f4p2/2851,c33809/f1p0/2804,c14627/f2p1/2693,c18687/f2p3/2562,c27277/f1p0/2788,c28417/f1p2/3078,c33790/f5p4/2714,c42394/f1p1/2688
chr1	Intron retention	25255186	25255104	-	chr1:25243778-25362321C	c14627/f2p1/2693,c15100/f1p0/2877,c18687/f2p3/2562,c26738/f4p2/2851,c27277/f1p0/2788,c28417/f1p2/3078,c29013/f1p2/3064,c33790/f5p4/2714,c33809/f1p0/2804,c42394/f1p1/2688
chr1	Intron retention	25304302	25304226	-	chr1:25243778-25362321C	c42394/f1p1/2688,c26738/f4p2/2851,c27277/f1p0/2788,c33790/f5p4/2714,c33809/f1p0/2804
chr1	Alternative 3' splice site	25305832	25305791	-	chr1:25243778-25362321C	c14627/f2p1/2693,c15100/f1p0/2877,c18687/f2p3/2562,c26738/f4p2/2851,c27277/f1p0/2788,c29013/f1p2/3064,c33790/f5p4/2714,c42394/f1p1/2688,c33809/f1p0/2804
chr1	Alternative 5' splice site	25337408	25337389	-	chr1:25243778-25362321C	c54234/f1p0/3587,c53791/f2p0/3747
chr1	Alternative 3' splice site	25552226	25552200	-	chr1:25476301-25669245C	c11023/f1p1/2054,c30687/f1p1/2662,c46508/f1p0/3076
chr1	Intron retention	25552917	25552434	-	chr1:25476301-25669245C	c46508/f1p0/3076,c11023/f1p1/2054,c30687/f1p1/2662
chr1	Intron retention	25552295	25552200	-	chr1:25550398-25555143C	c24990/f1p1/2139,c16624/f1p1/1742
chr1	Intron retention	25553109	25552750	-	chr1:25550398-25555143C	c24990/f1p1/2139,c10521/f1p0/1639,c16624/f1p1/1742,c28330/f1p0/3294,c30395/f2p2/2972
chr1	Alternative 3' splice site	25554363	25554304	-	chr1:25550398-25555143C	c24990/f1p1/2139,c10521/f1p0/1639,c16624/f1p1/1742,c28330/f1p0/3294,c30395/f2p2/2972
chr1	Intron retention	25555017	25554617	-	chr1:25550398-25555143C	c16624/f1p1/1742,c24990/f1p1/2139,c28330/f1p0/3294,c30395/f2p2/2972
chr1	Intron retention	25665387	25665331	-	chr1:25664388-25669456C	c35954/f1p0/2767,c35981/f2p0/3050,c47750/f1p0/2992,c19923/f3p3/3365,c25146/f1p0/3038,c43605/f1p0/3156,c51130/f1p1/3402
chr1	Intron retention	25665886	25665029	-	chr1:25664388-25669456C	c35954/f1p0/2767,c35981/f2p0/3050,c47750/f1p0/2992,c43633/f1p1/2810
chr1	Exon skipping	25666279	25665605	-	chr1:25664388-25669456C	c17497/f1p0/1752,c47426/f1p0/2379,c43633/f1p1/2810
chr1	Alternative 3' splice site	25666279	25665029	-	chr1:25664388-25669456C	c35954/f1p0/2767,c35981/f2p0/3050,c47750/f1p0/2992,c17497/f1p0/1752,c47426/f1p0/2379
chr1	Alternative 3' splice site	25668030	25668022	-	chr1:25664388-25669456C	c17497/f1p0/1752,c19923/f3p3/3365,c35954/f1p0/2767,c35981/f2p0/3050,c43605/f1p0/3156,c43633/f1p1/2810,c47426/f1p0/2379,c47750/f1p0/2992,c51130/f1p1/3402,c25146/f1p0/3038
chr1	Intron retention	25668244	25668030	-	chr1:25664388-25669456C	c60732/f1p0/3735,c17497/f1p0/1752,c19923/f3p3/3365,c35981/f2p0/3050,c43633/f1p1/2810,c47426/f1p0/2379,c47750/f1p0/2992
chr1	Alternative 3' splice site	25668468	25668409	-	chr1:25664388-25669456C	c25146/f1p0/3038,c43605/f1p0/3156,c17497/f1p0/1752,c19923/f3p3/3365,c35981/f2p0/3050,c43633/f1p1/2810,c47426/f1p0/2379,c47750/f1p0/2992
chr1	Intron retention	25669123	25668723	-	chr1:25664388-25669456C	c19923/f3p3/3365,c43605/f1p0/3156,c43633/f1p1/2810,c17497/f1p0/1752,c25146/f1p0/3038,c35981/f2p0/3050,c47750/f1p0/2992
chr1	Intron retention	25989028	25989869	+	chr1:25988091-25991334W	c36485/f1p0/3211,c21625/f1p0/2986
chr1	Intron retention	26538455	26539988	+	chr1:26537520-26540608W	c39464/f1p0/2870,c1346/f4p4/1917
chr1	Alternative 5' splice site	27288831	27288966	+	chr1:27288071-27291269W	c10918/f1p0/1524,c10537/f1p1/1675
chr1	Alternative 3' splice site	27297496	27297505	+	chr1:27296793-27335214W	c47207/f1p1/3816,c38767/f1p2/3831
chr1	Mutually exclusive exon	27297496	27299378	+	chr1:27296793-27335214W	c47207/f1p1/3816,c54713/f1p0/3905
chr1	Alternative 5' splice site	27299378	27299380	+	chr1:27296793-27335214W	c54713/f1p0/3905,c38767/f1p2/3831
chr1	Alternative 5' splice site	27361272	27361268	-	chr1:27356166-27520031C	c62553/f1p4/3655,c56897/f1p2/3757
chr1	Intron retention	27544665	27544186	-	chr1:27542582-27547207C	c18056/f1p0/2999,c12145/f1p0/1687,c4884/f2p0/1502,c8143/f1p0/1587
chr1	Intron retention	27545656	27545184	-	chr1:27542582-27547207C	c18056/f1p0/2999,c8143/f1p0/1587
chr1	Alternative 3' splice site	27545693	27545686	-	chr1:27542582-27547207C	c12145/f1p0/1687,c4884/f2p0/1502,c8143/f1p0/1587
chr1	Intron retention	27823334	27823182	-	chr1:27822182-27835067C	c10908/f1p0/1724,c19727/f1p0/1629,c8756/f1p0/1779
chr1	Intron retention	27918564	27918480	-	chr1:27917495-27922619C	c8398/f1p1/1744,c1046/f4p1/1655,c25688/f1p1/1638
chr1	Intron retention	27980053	27979955	-	chr1:27979713-27984661C	c24002/f1p0/2806,c36191/f1p1/3253
chr1	Alternative 3' splice site	27981062	27981051	-	chr1:27979713-27984661C	c44302/f1p1/3152,c13937/f15p5/3203,c24002/f1p0/2806,c36191/f1p1/3253,c41608/f1p6/3349
chr1	Intron retention	27982433	27982339	-	chr1:27979713-27984661C	c36191/f1p1/3253,c13937/f15p5/3203,c24002/f1p0/2806,c38637/f1p0/3682.1,c41608/f1p6/3349,c44302/f1p1/3152,c50323/f1p2/3754
chr1	Intron retention	28196286	28196824	+	chr1:28196101-28227513W	c36582/f1p3/3270,c24704/f1p0/2513
chr1	Intron retention	28196286	28196824	+	chr1:28196101-28227513W	c40558/f1p1/3226,c42341/f1p1/3308,c18929/f1p0/2744,c30719/f1p0/2737
chr1	Intron retention	28196286	28196824	+	chr1:28196101-28227513W	c20961/f1p0/3341,c18106/f1p0/2723.1
chr1	Alternative 3' splice site	28587397	28587283	-	chr1:28582359-28595077C	c24407/f1p0/3237,c39460/f1p0/3860
chr1	Alternative 3' splice site	28591282	28591275	-	chr1:28582359-28595077C	c39460/f1p0/3860,c24407/f1p0/3237
chr1	Intron retention	2869967	2869779	-	chr1:2868740-2872172C	c11044/f1p0/1574,c4416/f1p0/1602
chr1	Exon skipping	29159140	29159097	-	chr1:29151564-29159479C	c20735/f2p0/2865,c14414/f2p2/2791
chr1	Intron retention	29159317	29159140	-	chr1:29151564-29159479C	c43689/f1p3/2922,c14414/f2p2/2791
chr1	Intron retention	29382229	29382544	+	chr1:29254401-29383768W	c61968/f1p1/4204,c62673/f1p0/3949,c48443/f5p5/3791,c52960/f3p0/3658,c55143/f1p0/3413,c57042/f1p0/4217
chr1	Intron retention	29760581	29760778	+	chr1:29760269-29879103W	c40450/f1p1/3827,c47440/f1p1/4178,c60216/f1p3/4005,c53733/f1p0/3657
chr1	Alternative 3' splice site	29981299	29981289	-	chr1:29980189-30040616C	c57795/f1p0/3855,c53263/f1p0/3639
chr1	Intron retention	29981374	29981289	-	chr1:29980189-30040616C	c36565/f1p1/2672,c53263/f1p0/3639
chr1	Intron retention	29981374	29981299	-	chr1:29980189-30040616C	c36565/f1p1/2672,c57795/f1p0/3855
chr1	Intron retention	29989492	29989256	-	chr1:29980189-30040616C	c53263/f1p0/3639,c61189/f1p0/3647.1
chr1	Intron retention	30112721	30112046	-	chr1:30110665-30115942C	c52678/f1p1/3706,c24352/f1p0/3295,c29273/f1p3/2911,c30860/f12p9/3607,c38434/f3p3/3647,c38534/f6p10/3828,c43685/f1p0/3702,c54585/f1p0/3467,c55100/f1p0/3392.1,c6980/f1p1/1685
chr1	Exon skipping	30115267	30113185	-	chr1:30110665-30115942C	c6980/f1p1/1685,c30860/f12p9/3607,c38434/f3p3/3647,c38534/f6p10/3828,c43685/f1p0/3702,c54585/f1p0/3467
chr1	Intron retention	30132385	30132264	-	chr1:30130904-30136176C	c12653/f1p0/1774,c15694/f1p0/1736,c5062/f1p0/2249,c9798/f1p0/2038.2
chr1	Intron retention	30133102	30132903	-	chr1:30130904-30136176C	c5062/f1p0/2249,c12653/f1p0/1774,c15694/f1p0/1736
chr1	Alternative 3' splice site	30135400	30135318	-	chr1:30130904-30136176C	c15694/f1p0/1736,c9798/f1p0/2038.1,c12653/f1p0/1774,c5062/f1p0/2249
chr1	Intron retention	30376140	30376027	-	chr1:30374012-30378446C	c45914/f1p2/3304,c20694/f3p3/2993,c34378/f1p2/3210
chr1	Intron retention	30394789	30394702	-	chr1:30394104-30396591C	c3120/f1p1/2124,c6904/f1p1/1591
chr1	Intron retention	30395064	30394973	-	chr1:30394104-30396591C	c11628/f1p0/1743,c3120/f1p1/2124
chr1	Intron retention	30395064	30394702	-	chr1:30394104-30396591C	c11628/f1p0/1743,c6904/f1p1/1591
chr1	Alternative 5' splice site	30409714	30409663	-	chr1:30408985-30412244C	c45800/f1p0/3166,c34889/f8p10/3176
chr1	Intron retention	30636925	30636353	-	chr1:30634635-30637140C	c4446/f1p11/2264,c37150/f3p16/1645
chr1	Intron retention	30827320	30827410	+	chr1:30825448-30830751W	c61361/f1p0/6828.1,c58110/f1p2/4113.1
chr1	Intron retention	30858230	30858339	+	chr1:30856845-30863074W	c28595/f1p3/2869,c14230/f7p16/2833,c15418/f1p0/2736,c22996/f1p6/2504,c25223/f1p0/2851,c28557/f1p4/2699,c29936/f1p4/2791,c30027/f1p2/2722,c32787/f1p2/2842,c34141/f1p0/2818,c34280/f1p5/3095,c34298/f2p2/2832,c44755/f1p0/5845.1.2,c51194/f1p1/3705
chr1	Intron retention	30858534	30858895	+	chr1:30856845-30863074W	c34280/f1p5/3095,c14230/f7p16/2833,c15418/f1p0/2736,c22996/f1p6/2504,c25223/f1p0/2851,c28557/f1p4/2699,c28595/f1p3/2869,c29936/f1p4/2791,c30027/f1p2/2722,c32787/f1p2/2842,c34141/f1p0/2818,c34298/f2p2/2832,c34822/f1p1/4927.1,c44755/f1p0/5845.1.2,c46616/f1p0/3364.1
chr1	Intron retention	30858964	30860182	+	chr1:30856845-30863074W	c51194/f1p1/3705,c14230/f7p16/2833,c15418/f1p0/2736,c22996/f1p6/2504,c28557/f1p4/2699,c28595/f1p3/2869,c29936/f1p4/2791,c32787/f1p2/2842,c34141/f1p0/2818,c34298/f2p2/2832,c34822/f1p1/4927.1,c44755/f1p0/5845.1.2
chr1	Intron retention	30858964	30860182	+	chr1:30856845-30863074W	c51194/f1p1/3705,c25223/f1p0/2851,c30027/f1p2/2722,c46616/f1p0/3364.1
chr1	Intron retention	30859342	30859426	+	chr1:30856845-30863074W	c25223/f1p0/2851,c30027/f1p2/2722,c46616/f1p0/3364.1,c14230/f7p16/2833,c15418/f1p0/2736,c22996/f1p6/2504,c28557/f1p4/2699,c28595/f1p3/2869,c29936/f1p4/2791,c32787/f1p2/2842,c34141/f1p0/2818,c34280/f1p5/3095,c34298/f2p2/2832,c34822/f1p1/4927.1,c44755/f1p0/5845.1.2
chr1	Alternative 3' splice site	30860649	30860835	+	chr1:30856845-30863074W	c44755/f1p0/5845.1.2,c14230/f7p16/2833,c15418/f1p0/2736,c22996/f1p6/2504,c25223/f1p0/2851,c28557/f1p4/2699,c28595/f1p3/2869,c29936/f1p4/2791,c30027/f1p2/2722,c32787/f1p2/2842,c34141/f1p0/2818,c34280/f1p5/3095,c34298/f2p2/2832,c34822/f1p1/4927.1,c46616/f1p0/3364.1,c51194/f1p1/3705
chr1	Intron retention	30861556	30861628	+	chr1:30856845-30863074W	c28595/f1p3/2869,c34298/f2p2/2832,c51194/f1p1/3705,c14230/f7p16/2833,c15418/f1p0/2736,c22996/f1p6/2504,c25223/f1p0/2851,c28557/f1p4/2699,c29936/f1p4/2791,c30027/f1p2/2722,c32787/f1p2/2842,c34280/f1p5/3095,c34822/f1p1/4927.1,c44755/f1p0/5845.1.2
chr1	Intron retention	30861705	30861796	+	chr1:30856845-30863074W	c34141/f1p0/2818,c14230/f7p16/2833,c15418/f1p0/2736,c22996/f1p6/2504,c25223/f1p0/2851,c28557/f1p4/2699,c29936/f1p4/2791,c30027/f1p2/2722,c34280/f1p5/3095,c34822/f1p1/4927.1,c44755/f1p0/5845.1.2
chr1	Intron retention	30861918	30862001	+	chr1:30856845-30863074W	c32787/f1p2/2842,c14230/f7p16/2833,c15418/f1p0/2736,c22996/f1p6/2504,c25223/f1p0/2851,c28557/f1p4/2699,c28595/f1p3/2869,c29936/f1p4/2791,c30027/f1p2/2722,c34280/f1p5/3095,c34298/f2p2/2832,c34822/f1p1/4927.1,c44755/f1p0/5845.1.2,c51194/f1p1/3705
chr1	Alternative 3' splice site	30901414	30901366	-	chr1:30895386-30903160C	c56591/f1p4/3913,c39347/f4p6/3943,c40551/f1p0/4399,c56958/f1p0/3904,c60037/f1p0/4144
chr1	Exon skipping	30909528	30909274	-	chr1:30907479-30921454C	c15871/f1p0/2900,c28620/f1p1/3168,c32888/f1p0/3022,c45206/f1p0/3759.1,c46807/f1p0/3326
chr1	Alternative 3' splice site	30909940	30909939	-	chr1:30907479-30921454C	c15871/f1p0/2900,c45206/f1p0/3759.1,c28620/f1p1/3168
chr1	Alternative 5' splice site	30910182	30910170	-	chr1:30907479-30921454C	c15871/f1p0/2900,c45206/f1p0/3759.1,c32888/f1p0/3022,c46807/f1p0/3326
chr1	Alternative 3' splice site	30921189	30921183	-	chr1:30907479-30921454C	c28620/f1p1/3168,c32888/f1p0/3022,c15871/f1p0/2900,c45206/f1p0/3759.2
chr1	Alternative 3' splice site	31126771	31126754	-	chr1:31124931-31131031C	c18850/f1p0/2137,c4053/f1p0/2197
chr1	Intron retention	31920812	31921752	+	chr1:31919554-32103799W	c38749/f1p0/2597.1,c11154/f1p0/1802
chr1	Intron retention	32038121	32038133	+	chr1:31919554-32103799W	c1981/f2p0/1743,c15717/f1p0/1996
chr1	Intron retention	32250620	32249403	-	chr1:32247721-32252010C	c35241/f1p0/3027,c14436/f8p1/2654,c32876/f1p0/2663
chr1	Exon skipping	32618270	32618373	+	chr1:32617729-32632666W	c32967/f1p0/3098,c44084/f1p0/3238
chr1	Intron retention	32721608	32721721	+	chr1:32691445-32875419W	c61581/f1p1/3984,c30797/f1p0/2708
chr1	Intron retention	32733602	32733618	+	chr1:32691445-32875419W	c24683/f1p0/3038.1,c25696/f2p1/2753
chr1	Intron retention	32745301	32745549	+	chr1:32742354-32932188W	c6775/f1p0/1987,c63987/f1p0/1819
chr1	Alternative 5' splice site	32786813	32786821	+	chr1:32779260-32788594W	c53866/f1p0/4876.1,c43823/f1p0/11303.1.1
chr1	Alternative 5' splice site	32785995	32785984	-	chr1:32785227-32788722C	c41782/f1p0/6974.2,c42954/f1p0/3599.1,c52389/f1p0/4899.1,c54045/f1p0/15123.3,c53139/f1p0/4352.2
chr1	Alternative 5' splice site	32785996	32785995	-	chr1:32785227-32788722C	c53482/f1p0/5052.3,c41782/f1p0/6974.2,c42954/f1p0/3599.1,c52389/f1p0/4899.1,c54045/f1p0/15123.3
chr1	Alternative 5' splice site	32785996	32785984	-	chr1:32785227-32788722C	c53482/f1p0/5052.3,c53139/f1p0/4352.2
chr1	Intron retention	33178144	33179562	+	chr1:33174006-33187029W	c50757/f1p0/3797,c2789/f1p0/2105
chr1	Intron retention	33352497	33352581	+	chr1:33350362-33354254W	c8086/f1p0/1787,c16857/f1p0/1701
chr1	Alternative 5' splice site	33480693	33480697	+	chr1:33479785-33483093W	c52720/f1p0/6025.2,c54188/f1p0/10673.1
chr1	Alternative 3' splice site	33710655	33710686	+	chr1:33709478-33721761W	c39761/f1p0/3478,c42663/f2p0/3722,c31372/f1p0/2972,c43733/f1p1/3745,c50953/f1p0/3823,c56785/f1p0/3632,c61537/f1p0/3810
chr1	Exon skipping	33710900	33710970	+	chr1:33709478-33721761W	c42663/f2p0/3722,c31372/f1p0/2972,c39761/f1p0/3478,c43733/f1p1/3745,c50953/f1p0/3823,c56785/f1p0/3632,c61537/f1p0/3810
chr1	Intron retention	33715849	33716367	+	chr1:33709478-33721761W	c61537/f1p0/3810,c31372/f1p0/2972,c39761/f1p0/3478,c42663/f2p0/3722,c43733/f1p1/3745,c50953/f1p0/3823,c56785/f1p0/3632
chr1	Intron retention	33716885	33716959	+	chr1:33709478-33721761W	c56785/f1p0/3632,c31372/f1p0/2972,c39761/f1p0/3478,c42663/f2p0/3722,c43733/f1p1/3745,c50953/f1p0/3823,c61537/f1p0/3810
chr1	Intron retention	3383341	3383355	+	chr1:3382949-3387935W	c19051/f1p3/3171,c30521/f1p3/3196
chr1	Intron retention	3385353	3385884	+	chr1:3382949-3387935W	c61450/f1p0/3719,c19051/f1p3/3171,c30521/f1p3/3196
chr1	Intron retention	3385884	3385353	-	chr1:3382969-3388014C	c52418/f2p0/3688,c61657/f1p0/3694,c31703/f1p1/2922,c48262/f1p0/3201
chr1	Alternative 3' splice site	34112750	34113102	+	chr1:34112195-34116868W	c42785/f1p1/3908,c50373/f1p1/3888,c51105/f1p0/4014,c51992/f1p1/3943,c53542/f1p1/3705,c56302/f1p0/3875,c58565/f2p2/3810,c42555/f1p1/3649,c48028/f1p0/3170,c52539/f1p0/3619,c56558/f1p0/3892.2
chr1	Intron retention	34114419	34114432	+	chr1:34112195-34116868W	c40932/f1p0/3418.1,c42555/f1p1/3649,c42785/f1p1/3908,c50373/f1p1/3888,c51992/f1p1/3943,c52539/f1p0/3619,c53542/f1p1/3705,c54167/f1p0/3459.1,c56302/f1p0/3875,c48028/f1p0/3170,c58565/f2p2/3810
chr1	Intron retention	34115681	34115826	+	chr1:34112195-34116868W	c51105/f1p0/4014,c42555/f1p1/3649
chr1	Intron retention	34130249	34130027	-	chr1:34126964-34130695C	c16210/f1p0/3516,c24265/f1p0/2811,c31782/f1p1/2767,c36614/f1p0/2784
chr1	Intron retention	34400671	34400696	+	chr1:34260637-34427660W	c26971/f2p0/2887,c33162/f1p0/2771
chr1	Intron retention	34585333	34586984	+	chr1:34561653-34592012W	c50823/f1p2/4225,c18140/f1p0/2813
chr1	Intron retention	34585333	34586984	+	chr1:34561653-34592012W	c50823/f1p2/4225,c36617/f1p0/6118.1,c42835/f1p0/2709
chr1	Exon skipping	34585795	34585850	+	chr1:34561653-34592012W	c18140/f1p0/2813,c36617/f1p0/6118.1,c42835/f1p0/2709
chr1	Alternative 5' splice site	34731546	34731513	-	chr1:34730516-34736350C	c13954/f5p16/2845,c21740/f1p0/3394,c27164/f3p11/3363,c30262/f1p2/3178,c37308/f8p17/3387,c45131/f1p2/3199,c46932/f1p7/3068,c49012/f72p25/3343,c51945/f1p3/3266,c52547/f1p0/3715.1,c60882/f1p2/3480,c64102/f13p24/3244,c8822/f1p0/1753,c38944/f1p1/3611.2
chr1	Alternative 3' splice site	34732192	34732137	-	chr1:34730516-34736350C	c13954/f5p16/2845,c21740/f1p0/3394,c27164/f3p11/3363,c30262/f1p2/3178,c37308/f8p17/3387,c38944/f1p1/3611.2,c46932/f1p7/3068,c49012/f72p25/3343,c51945/f1p3/3266,c52547/f1p0/3715.1,c60882/f1p2/3480,c64102/f13p24/3244,c8822/f1p0/1753,c45131/f1p2/3199
chr1	Intron retention	34732625	34732489	-	chr1:34730516-34736350C	c52547/f1p0/3715.1,c13954/f5p16/2845,c21740/f1p0/3394,c27164/f3p11/3363,c30262/f1p2/3178,c37308/f8p17/3387,c45131/f1p2/3199,c46932/f1p7/3068,c49012/f72p25/3343,c51945/f1p3/3266,c60882/f1p2/3480,c64102/f13p24/3244,c8822/f1p0/1753
chr1	Intron retention	34734118	34734037	-	chr1:34730516-34736350C	c51945/f1p3/3266,c13954/f5p16/2845,c21740/f1p0/3394,c27164/f3p11/3363,c30262/f1p2/3178,c37308/f8p17/3387,c45131/f1p2/3199,c46932/f1p7/3068,c49012/f72p25/3343,c60882/f1p2/3480,c64102/f13p24/3244
chr1	Alternative 5' splice site	35173309	35173307	-	chr1:35171461-35179996C	c52410/f1p9/3807,c45993/f1p2/3068,c57188/f2p0/3884
chr1	Alternative 3' splice site	35174250	35174234	-	chr1:35171461-35179996C	c45993/f1p2/3068,c52371/f1p0/4547.1,c52410/f1p9/3807,c57188/f2p0/3884
chr1	Intron retention	35209977	35210050	+	chr1:35206882-35212214W	c45908/f1p1/4085,c49725/f2p1/3961
chr1	Intron retention	35273960	35273340	-	chr1:35270902-35275960C	c38759/f1p1/3767,c14430/f3p3/3185
chr1	Intron retention	35279616	35279133	-	chr1:35276242-35795513C	c50600/f1p0/3758,c34402/f1p1/2782,c43979/f1p1/3819,c47367/f1p0/3889.1
chr1	Intron retention	35280945	35280755	-	chr1:35276242-35795513C	c50600/f1p0/3758,c34402/f1p1/2782,c47367/f1p0/3889.2
chr1	Alternative 5' splice site	35781618	35781615	-	chr1:35276242-35795513C	c47367/f1p0/3889.2,c50600/f1p0/3758,c34402/f1p1/2782
chr1	Alternative 3' splice site	35903597	35903569	-	chr1:35901227-35912098C	c11422/f1p2/1710,c13625/f5p2/2991,c13801/f4p3/3107,c16274/f1p0/1716,c21995/f1p0/2044,c24426/f2p0/3285,c28396/f3p1/3303,c36152/f1p0/2940,c47307/f1p0/3840,c49564/f3p0/3793,c49569/f5p5/3907,c51126/f1p3/3957,c51600/f1p0/3766,c52126/f1p0/4833.1,c53095/f1p1/4045.1,c56627/f1p0/3833.1,c60947/f1p4/3200,c61159/f1p2/3904,c29622/f1p1/3162
chr1	Alternative 3' splice site	35907867	35907840	-	chr1:35901227-35912098C	c51126/f1p3/3957,c13625/f5p2/2991,c13801/f4p3/3107,c24426/f2p0/3285,c28396/f3p1/3303,c29622/f1p1/3162,c36152/f1p0/2940,c47307/f1p0/3840,c48010/f1p0/4020.1,c4921/f1p0/1756,c49564/f3p0/3793,c49569/f5p5/3907,c51600/f1p0/3766,c53095/f1p1/4045.1,c56627/f1p0/3833.1,c60947/f1p4/3200,c61159/f1p2/3904
chr1	Alternative 5' splice site	35908384	35908367	-	chr1:35901227-35912098C	c61159/f1p2/3904,c13625/f5p2/2991,c13801/f4p3/3107,c24426/f2p0/3285,c28396/f3p1/3303,c29622/f1p1/3162,c36152/f1p0/2940,c47307/f1p0/3840,c48010/f1p0/4020.1,c4921/f1p0/1756,c49564/f3p0/3793,c49569/f5p5/3907,c51126/f1p3/3957,c51600/f1p0/3766,c53095/f1p1/4045.1,c56627/f1p0/3833.1,c60947/f1p4/3200
chr1	Intron retention	35911929	35911256	-	chr1:35901227-35912098C	c51126/f1p3/3957,c61159/f1p2/3904,c56627/f1p0/3833.1
chr1	Alternative 5' splice site	35911930	35911929	-	chr1:35901227-35912098C	c29622/f1p1/3162,c36152/f1p0/2940
chr1	Intron retention	35963861	35963638	-	chr1:35959957-35964310C	c61699/f1p1/3890,c59546/f1p1/4074.2
chr1	Alternative 5' splice site	35967156	35967140	-	chr1:35964664-35970107C	c27042/f1p0/2681,c15166/f1p0/3076,c27153/f1p0/3211,c27424/f1p0/2676.2,c2996/f1p0/1824,c34058/f1p0/2716,c36157/f1p0/2678,c4558/f1p0/1775,c9903/f3p0/1988
chr1	Exon skipping	35968015	35967870	-	chr1:35964664-35970107C	c15166/f1p0/3076,c20832/f1p0/2945.1,c27042/f1p0/2681,c27153/f1p0/3211,c27424/f1p0/2676.2,c2996/f1p0/1824,c36157/f1p0/2678,c4558/f1p0/1775,c62170/f1p0/3561.1,c9903/f3p0/1988,c34058/f1p0/2716
chr1	Intron retention	35968366	35968283	-	chr1:35964664-35970107C	c15166/f1p0/3076,c27042/f1p0/2681,c27153/f1p0/3211,c36157/f1p0/2678,c62170/f1p0/3561.1,c20832/f1p0/2945.1,c2996/f1p0/1824,c34058/f1p0/2716,c4558/f1p0/1775,c9903/f3p0/1988
chr1	Intron retention	35969258	35968615	-	chr1:35964664-35970107C	c15166/f1p0/3076,c20832/f1p0/2945.1,c27042/f1p0/2681,c27153/f1p0/3211,c27424/f1p0/2676.1,c2996/f1p0/1824,c34058/f1p0/2716,c36157/f1p0/2678,c4558/f1p0/1775,c52219/f1p0/3822.1,c62170/f1p0/3561.1,c9903/f3p0/1988
chr1	Exon skipping	35969636	35969531	-	chr1:35964664-35970107C	c4558/f1p0/1775,c27424/f1p0/2676.1,c2996/f1p0/1824,c34058/f1p0/2716,c36157/f1p0/2678,c9903/f3p0/1988
chr1	Intron retention	35969967	35969636	-	chr1:35964664-35970107C	c15166/f1p0/3076,c52219/f1p0/3822.1,c27424/f1p0/2676.1,c34058/f1p0/2716
chr1	Alternative 5' splice site	35969967	35969531	-	chr1:35964664-35970107C	c4558/f1p0/1775,c15166/f1p0/3076,c52219/f1p0/3822.1
chr1	Alternative 5' splice site	35969996	35969967	-	chr1:35964664-35970107C	c27153/f1p0/3211,c27424/f1p0/2676.1,c34058/f1p0/2716
chr1	Intron retention	35969996	35969636	-	chr1:35964664-35970107C	c20832/f1p0/2945.1,c27042/f1p0/2681
chr1	Intron retention	35969996	35969636	-	chr1:35964664-35970107C	c15166/f1p0/3076,c52219/f1p0/3822.1,c27153/f1p0/3211
chr1	Intron retention	3858530	3859951	+	chr1:3857272-3869653W	c42613/f1p2/4105.1,c51353/f1p3/3700,c57498/f1p2/3873,c10820/f1p2/2034,c6214/f1p2/2173
chr1	Alternative 5' splice site	3858530	3860198	+	chr1:3857272-3869653W	c2969/f1p0/2228,c42613/f1p2/4105.1,c51353/f1p3/3700,c57498/f1p2/3873
chr1	Exon skipping	3859951	3860198	+	chr1:3857272-3869653W	c2969/f1p0/2228,c10820/f1p2/2034,c6214/f1p2/2173
chr1	Alternative 3' splice site	3864231	3864246	+	chr1:3857272-3869653W	c51353/f1p3/3700,c10820/f1p2/2034,c2969/f1p0/2228,c42613/f1p2/4105.1,c57498/f1p2/3873,c6214/f1p2/2173
chr1	Intron retention	3868455	3868740	+	chr1:3857272-3869653W	c57498/f1p2/3873,c10820/f1p2/2034,c2969/f1p0/2228,c51353/f1p3/3700,c6214/f1p2/2173
chr1	Alternative 3' splice site	3989211	3989164	-	chr1:3985479-3990383C	c11345/f1p1/1877,c9074/f1p1/1784,c21454/f1p0/1612
chr1	Intron retention	4034621	4034704	+	chr1:4033075-4036765W	c2666/f1p0/1657,c5717/f1p2/1597
chr1	Intron retention	4082863	4083153	+	chr1:4081610-4088510W	c30137/f1p0/2698,c16509/f1p0/2907,c34549/f1p1/2978,c39642/f1p1/2679,c40500/f1p1/3757.2,c41331/f1p0/2923,c47534/f1p1/2971.2
chr1	Exon skipping	4083153	4083208	+	chr1:4081610-4088510W	c24047/f1p0/2845,c31199/f1p0/2774,c16509/f1p0/2907,c34549/f1p1/2978,c39642/f1p1/2679,c40500/f1p1/3757.2,c41331/f1p0/2923,c47534/f1p1/2971.2
chr1	Exon skipping	4083377	4083430	+	chr1:4081610-4088510W	c16509/f1p0/2907,c34549/f1p1/2978,c39642/f1p1/2679,c40500/f1p1/3757.2,c41331/f1p0/2923,c47534/f1p1/2971.2,c30137/f1p0/2698
chr1	Intron retention	4083726	4084402	+	chr1:4081610-4088510W	c16509/f1p0/2907,c24047/f1p0/2845,c41331/f1p0/2923,c30137/f1p0/2698,c39642/f1p1/2679
chr1	Intron retention	4084508	4084796	+	chr1:4081610-4088510W	c31199/f1p0/2774,c34549/f1p1/2978,c30137/f1p0/2698
chr1	Intron retention	4084508	4084821	+	chr1:4081610-4088510W	c31199/f1p0/2774,c34549/f1p1/2978,c39642/f1p1/2679
chr1	Alternative 3' splice site	4084774	4084796	+	chr1:4081610-4088510W	c24047/f1p0/2845,c16509/f1p0/2907,c30137/f1p0/2698,c41331/f1p0/2923
chr1	Alternative 3' splice site	4084774	4084821	+	chr1:4081610-4088510W	c24047/f1p0/2845,c39642/f1p1/2679
chr1	Alternative 3' splice site	4084796	4084821	+	chr1:4081610-4088510W	c16509/f1p0/2907,c30137/f1p0/2698,c41331/f1p0/2923,c39642/f1p1/2679
chr1	Intron retention	4085976	4086323	+	chr1:4081610-4088510W	c31199/f1p0/2774,c34549/f1p1/2978,c39642/f1p1/2679,c47534/f1p1/2971.1,c16509/f1p0/2907
chr1	Intron retention	4085976	4086323	+	chr1:4081610-4088510W	c31199/f1p0/2774,c34549/f1p1/2978,c39642/f1p1/2679,c47534/f1p1/2971.1,c24047/f1p0/2845,c30137/f1p0/2698,c41331/f1p0/2923
chr1	Exon skipping	4086169	4086251	+	chr1:4081610-4088510W	c24047/f1p0/2845,c30137/f1p0/2698,c41331/f1p0/2923,c16509/f1p0/2907
chr1	Alternative 5' splice site	4087605	4087614	+	chr1:4081610-4088510W	c16509/f1p0/2907,c24047/f1p0/2845,c30137/f1p0/2698,c31199/f1p0/2774,c34549/f1p1/2978,c39642/f1p1/2679,c40500/f1p1/3757.1,c41331/f1p0/2923,c47534/f1p1/2971.1
chr1	Intron retention	4097391	4097359	-	chr1:4094431-4099164C	c23137/f1p0/2941,c31553/f1p0/2886,c60592/f1p0/3783.1,c29930/f1p0/2995
chr1	Exon skipping	4098303	4098252	-	chr1:4094431-4099164C	c31553/f1p0/2886,c23137/f1p0/2941,c29930/f1p0/2995,c60592/f1p0/3783.1
chr1	Alternative 3' splice site	4125500	4125480	-	chr1:4124673-4129220C	c3337/f1p0/1953,c4078/f1p1/1909
chr1	Alternative 5' splice site	4478635	4478634	-	chr1:4476528-4485135C	c32281/f2p0/2953,c16925/f1p0/2798,c24612/f1p1/2968,c34915/f1p0/2797,c35775/f1p0/2883
chr1	Alternative 5' splice site	4478636	4478635	-	chr1:4476528-4485135C	c16463/f1p0/2863,c33715/f1p0/2942.1
chr1	Intron retention	4479685	4479598	-	chr1:4476528-4485135C	c23440/f1p0/2738,c34988/f1p0/2820,c45110/f1p0/2820,c45552/f1p0/4205,c55174/f1p0/3667,c16463/f1p0/2863
chr1	Intron retention	4479685	4479598	-	chr1:4476528-4485135C	c16925/f1p0/2798,c24612/f1p1/2968,c34915/f1p0/2797,c35775/f1p0/2883,c24257/f6p1/2854,c33038/f1p0/2732,c36968/f2p0/2782,c41699/f1p0/2955
chr1	Alternative 3' splice site	4479892	4479847	-	chr1:4476528-4485135C	c16463/f1p0/2863,c33715/f1p0/2942.1,c38658/f1p0/2853
chr1	Alternative 5' splice site	4480845	4480844	-	chr1:4476528-4485135C	c36968/f2p0/2782,c16925/f1p0/2798,c24257/f6p1/2854,c24612/f1p1/2968,c28020/f1p0/2705,c32281/f2p0/2953,c33038/f1p0/2732,c34915/f1p0/2797,c35775/f1p0/2883,c41699/f1p0/2955
chr1	Alternative 5' splice site	4480848	4480844	-	chr1:4476528-4485135C	c48234/f1p1/2992,c16925/f1p0/2798,c24257/f6p1/2854,c24612/f1p1/2968,c28020/f1p0/2705,c32281/f2p0/2953,c33038/f1p0/2732,c34915/f1p0/2797,c35775/f1p0/2883,c41699/f1p0/2955
chr1	Alternative 5' splice site	4480848	4480845	-	chr1:4476528-4485135C	c48234/f1p1/2992,c36968/f2p0/2782
chr1	Intron retention	4480938	4480932	-	chr1:4476528-4485135C	c16463/f1p0/2863,c23440/f1p0/2738,c29863/f1p1/3063,c33715/f1p0/2942.1,c34988/f1p0/2820,c45110/f1p0/2820,c45552/f1p0/4205,c55174/f1p0/3667,c38658/f1p0/2853
chr1	Intron retention	4482025	4481882	-	chr1:4476528-4485135C	c45552/f1p0/4205,c16463/f1p0/2863,c16925/f1p0/2798,c23440/f1p0/2738,c24257/f6p1/2854,c24612/f1p1/2968,c26708/f2p0/2823,c28020/f1p0/2705,c29863/f1p1/3063,c32281/f2p0/2953,c33038/f1p0/2732,c33715/f1p0/2942.1,c34915/f1p0/2797,c34988/f1p0/2820,c35775/f1p0/2883,c36968/f2p0/2782,c38658/f1p0/2853,c41699/f1p0/2955,c45110/f1p0/2820
chr1	Exon skipping	4482809	4482734	-	chr1:4476528-4485135C	c16925/f1p0/2798,c24257/f6p1/2854,c28020/f1p0/2705,c29863/f1p1/3063,c33715/f1p0/2942.1,c34915/f1p0/2797,c34988/f1p0/2820,c38658/f1p0/2853,c41699/f1p0/2955,c45110/f1p0/2820,c45552/f1p0/4205,c16463/f1p0/2863,c23440/f1p0/2738,c24612/f1p1/2968,c26708/f2p0/2823,c32281/f2p0/2953,c33038/f1p0/2732,c35775/f1p0/2883,c36968/f2p0/2782
chr1	Intron retention	4483026	4482142	-	chr1:4476528-4485135C	c55174/f1p0/3667,c16463/f1p0/2863,c23440/f1p0/2738,c24612/f1p1/2968,c26708/f2p0/2823,c32281/f2p0/2953,c33038/f1p0/2732,c35775/f1p0/2883,c36968/f2p0/2782
chr1	Intron retention	4483026	4482142	-	chr1:4476528-4485135C	c55174/f1p0/3667,c16925/f1p0/2798,c24257/f6p1/2854,c28020/f1p0/2705,c29863/f1p1/3063,c33715/f1p0/2942.1,c34915/f1p0/2797,c34988/f1p0/2820,c38658/f1p0/2853,c41699/f1p0/2955,c45110/f1p0/2820
chr1	Exon skipping	4483661	4483613	-	chr1:4476528-4485135C	c16463/f1p0/2863,c16925/f1p0/2798,c23440/f1p0/2738,c24257/f6p1/2854,c24612/f1p1/2968,c26708/f2p0/2823,c28020/f1p0/2705,c32281/f2p0/2953,c33715/f1p0/2942.1,c34915/f1p0/2797,c36968/f2p0/2782,c38658/f1p0/2853,c45110/f1p0/2820,c45552/f1p0/4205,c55174/f1p0/3667,c29863/f1p1/3063,c33038/f1p0/2732,c34988/f1p0/2820,c35775/f1p0/2883
chr1	Intron retention	4483803	4483661	-	chr1:4476528-4485135C	c41699/f1p0/2955,c29863/f1p1/3063,c33038/f1p0/2732,c34988/f1p0/2820,c35775/f1p0/2883
chr1	Alternative 5' splice site	4483803	4483613	-	chr1:4476528-4485135C	c16463/f1p0/2863,c16925/f1p0/2798,c23440/f1p0/2738,c24257/f6p1/2854,c24612/f1p1/2968,c26708/f2p0/2823,c28020/f1p0/2705,c32281/f2p0/2953,c34915/f1p0/2797,c36968/f2p0/2782,c38658/f1p0/2853,c45110/f1p0/2820,c45552/f1p0/4205,c55174/f1p0/3667,c41699/f1p0/2955
chr1	Exon skipping	4607647	4607704	+	chr1:4607139-4611299W	c46539/f1p1/2958,c28239/f1p0/3200,c31086/f1p0/2779,c33447/f1p0/2762,c34832/f1p0/2726
chr1	Intron retention	4608883	4608963	+	chr1:4607139-4611299W	c28239/f1p0/3200,c31086/f1p0/2779,c33447/f1p0/2762,c34832/f1p0/2726,c46539/f1p1/2958
chr1	Exon skipping	4609731	4609806	+	chr1:4607139-4611299W	c34832/f1p0/2726,c28239/f1p0/3200,c31086/f1p0/2779,c33447/f1p0/2762,c46539/f1p1/2958
chr1	Intron retention	4610529	4610936	+	chr1:4607139-4611299W	c28239/f1p0/3200,c31086/f1p0/2779
chr1	Intron retention	4849002	4849458	+	chr1:4844620-4850227W	c24249/f1p0/2035,c12815/f1p0/1842
chr1	Alternative 3' splice site	5062593	5062573	-	chr1:5060835-5065126C	c10080/f1p1/2210,c12027/f1p1/1816,c8387/f1p0/2090
chr1	Intron retention	525927	527671	+	chr1:521369-530322W	c47721/f1p0/3326,c43195/f1p1/3716
chr1	Intron retention	525966	527533	+	chr1:521369-530322W	c47721/f1p0/3326,c57584/f1p0/3737
chr1	Intron retention	526296	527830	+	chr1:521369-530322W	c47721/f1p0/3326,c52766/f1p1/3756
chr1	Intron retention	526337	527894	+	chr1:521369-530322W	c47721/f1p0/3326,c61055/f1p1/3784
chr1	Intron retention	526349	527886	+	chr1:521369-530322W	c47721/f1p0/3326,c59377/f1p1/3689
chr1	Intron retention	527498	527895	+	chr1:521369-530322W	c47721/f1p0/3326,c18369/f1p0/3176
chr1	Alternative 3' splice site	529888	529895	+	chr1:521369-530322W	c52766/f1p1/3756,c59377/f1p1/3689
chr1	Intron retention	5396979	5396840	-	chr1:5394488-5421466C	c26453/f3p1/3060,c28741/f1p2/2941,c46717/f1p2/2900,c47973/f1p2/3022,c15602/f1p0/2905
chr1	Alternative 5' splice site	5415756	5415708	-	chr1:5394488-5421466C	c15602/f1p0/2905,c26453/f3p1/3060,c28741/f1p2/2941,c46717/f1p2/2900,c47973/f1p2/3022
chr1	Alternative 5' splice site	5420156	5420106	-	chr1:5394488-5421466C	c24436/f1p2/3107,c47973/f1p2/3022,c15602/f1p0/2905,c26453/f3p1/3060,c28741/f1p2/2941,c46717/f1p2/2900
chr1	Intron retention	5957398	5957060	-	chr1:5952834-5958282C	c38155/f2p0/3069,c46129/f1p1/3237,c1148/f6p1/2152,c20451/f1p0/3238,c20548/f2p1/2910,c22638/f1p1/2954,c25249/f1p0/2221
chr1	Intron retention	6079886	6079201	-	chr1:6063809-6081062C	c44539/f1p0/2659,c14701/f2p1/1881,c19578/f1p2/1809,c8904/f1p0/1883
chr1	Intron retention	6079924	6079232	-	chr1:6063809-6081062C	c44539/f1p0/2659,c24435/f1p2/2110
chr1	Alternative 3' splice site	6080625	6080555	-	chr1:6063809-6081062C	c24435/f1p2/2110,c44539/f1p0/2659,c14701/f2p1/1881,c22257/f1p2/2710
chr1	Alternative 5' splice site	6080771	6080741	-	chr1:6063809-6081062C	c8904/f1p0/1883,c14701/f2p1/1881
chr1	Exon skipping	6080819	6080771	-	chr1:6063809-6081062C	c19578/f1p2/1809,c8904/f1p0/1883
chr1	Exon skipping	6080819	6080741	-	chr1:6063809-6081062C	c19578/f1p2/1809,c14701/f2p1/1881
chr1	Intron retention	6080974	6080819	-	chr1:6063809-6081062C	c24435/f1p2/2110,c14701/f2p1/1881,c44539/f1p0/2659
chr1	Exon skipping	6588184	6588348	+	chr1:6585941-6594697W	c21652/f1p1/2781,c39056/f2p2/3659,c39427/f1p0/5913.3,c51529/f2p5/3890,c52706/f1p0/3807,c61308/f1p0/3756,c64118/f1p7/3761,c43400/f1p6/3837,c57371/f1p0/3857,c62085/f1p0/3787
chr1	Exon skipping	7429699	7429765	+	chr1:7425860-7432914W	c54488/f1p0/3712,c60310/f1p0/3581
chr1	Intron retention	7571833	7573072	+	chr1:7566920-7574448W	c19046/f2p0/2755,c33194/f1p0/2803,c47847/f1p0/2745.1
chr1	Mutually exclusive exon	7917708	7934608	+	chr1:7912627-8073280W	c51984/f1p0/14983.2.2,c24717/f1p0/4299.2
chr1	Intron retention	7934038	7934151	+	chr1:7912627-8073280W	c4568/f1p0/2268,c12578/f1p0/1808,c16764/f1p0/4076.1,c3960/f1p1/2244,c57262/f1p0/3612.1,c58908/f85p12/3539,c58939/f1p2/3314.1,c9121/f1p0/1773
chr1	Intron retention	8111309	8112265	+	chr1:8107387-8114331W	c53494/f1p1/3765,c17851/f1p0/2777,c23029/f1p9/3090,c64043/f2p7/2826
chr1	Intron retention	9129513	9129580	+	chr1:9126202-9533836W	c53675/f1p1/3877,c60658/f1p2/3706,c42117/f3p11/3857,c44217/f3p5/3681,c51227/f1p0/4281,c57792/f1p0/3638.2,c62389/f1p0/3775,c64125/f1p2/3546
chr1	Alternative 3' splice site	9129853	9129889	+	chr1:9126202-9533836W	c42117/f3p11/3857,c44217/f3p5/3681,c51227/f1p0/4281,c57792/f1p0/3638.2,c60658/f1p2/3706,c62389/f1p0/3775,c64125/f1p2/3546,c53675/f1p1/3877
chr1	Alternative 5' splice site	992104	990399	-	chr1:973106-992569C	c10832/f1p1/2014,c60994/f1p1/3759
chr10	Intron retention	110517	110857	+	chr10:100706-114142W	c52075/f1p0/3682.1,c43375/f1p2/3719,c45655/f1p1/3289
chr10	Alternative 5' splice site	112093	112127	+	chr10:100706-114142W	c45655/f1p1/3289,c43375/f1p2/3719
chr10	Intron retention	112093	112464	+	chr10:100706-114142W	c52075/f1p0/3682.1,c45655/f1p1/3289
chr10	Intron retention	112127	112464	+	chr10:100706-114142W	c52075/f1p0/3682.1,c43375/f1p2/3719
chr10	Intron retention	10388904	10389287	+	chr10:10373079-10392602W	c41129/f1p2/4130,c47191/f2p0/4012,c60508/f1p0/3883,c54312/f1p0/3779
chr10	Exon skipping	10528205	10528081	-	chr10:10526447-10531814C	c28528/f1p0/2598,c38728/f1p0/2877
chr10	Intron retention	10596788	10597263	+	chr10:10590759-10601538W	c44510/f1p0/3118,c29009/f1p0/3313
chr10	Intron retention	10596788	10597177	+	chr10:10590759-10601538W	c44510/f1p0/3118,c53426/f1p0/4038,c55067/f1p0/3766
chr10	Alternative 3' splice site	10597177	10597263	+	chr10:10590759-10601538W	c53426/f1p0/4038,c55067/f1p0/3766,c29009/f1p0/3313
chr10	Intron retention	10599647	10600208	+	chr10:10590759-10601538W	c53426/f1p0/4038,c29009/f1p0/3313,c55067/f1p0/3766
chr10	Alternative 5' splice site	11023341	11023369	+	chr10:11022129-11040739W	c27236/f1p0/2881,c40289/f1p0/3067.2,c40123/f1p1/2767
chr10	Intron retention	11032209	11032234	+	chr10:11022129-11040739W	c30400/f2p1/2724,c20543/f1p0/2709
chr10	Intron retention	11036389	11036518	+	chr10:11022129-11040739W	c27236/f1p0/2881,c40289/f1p0/3067.1,c8197/f1p0/3275.1,c20543/f1p0/2709,c23342/f1p0/3090,c30400/f2p1/2724,c40123/f1p1/2767
chr10	Alternative 3' splice site	11039185	11039224	+	chr10:11022129-11040739W	c27236/f1p0/2881,c40123/f1p1/2767,c20543/f1p0/2709,c23342/f1p0/3090,c30400/f2p1/2724,c40289/f1p0/3067.1,c8197/f1p0/3275.1
chr10	Alternative 5' splice site	11059316	11059318	+	chr10:11059090-11077799W	c38136/f2p4/2864,c29700/f1p1/2811,c35023/f1p1/2804
chr10	Intron retention	11068066	11068235	+	chr10:11059090-11077799W	c14124/f2p3/2896,c35619/f1p0/2884.1
chr10	Alternative 5' splice site	11068952	11068968	+	chr10:11059090-11077799W	c29700/f1p1/2811,c35023/f1p1/2804,c15463/f1p1/2698,c38136/f2p4/2864
chr10	Intron retention	11068952	11069052	+	chr10:11059090-11077799W	c40508/f1p0/2779,c29700/f1p1/2811,c35023/f1p1/2804
chr10	Intron retention	11068968	11069052	+	chr10:11059090-11077799W	c40508/f1p0/2779,c15463/f1p1/2698,c38136/f2p4/2864
chr10	Intron retention	11264765	11265206	+	chr10:11258854-11273306W	c53158/f1p1/3916,c59581/f1p1/3635,c14303/f5p1/3272,c24591/f2p0/3082,c35497/f1p0/3165
chr10	Alternative 3' splice site	11814537	11814495	-	chr10:11803728-11814991C	c29036/f1p0/3127.1,c39239/f1p2/2700,c27606/f1p0/2641
chr10	Intron retention	123315	123814	+	chr10:119886-125582W	c38468/f2p0/3035,c34956/f1p0/2719
chr10	Alternative 3' splice site	12492315	12492311	-	chr10:12489582-12496128C	c14425/f11p6/2958,c14471/f4p7/3051,c22759/f11p3/2768,c31128/f1p0/3413,c41247/f2p0/3084
chr10	Intron retention	12492377	12492315	-	chr10:12489582-12496128C	c20963/f1p3/3302,c14425/f11p6/2958,c14471/f4p7/3051,c22759/f11p3/2768,c31128/f1p0/3413
chr10	Intron retention	12492377	12492311	-	chr10:12489582-12496128C	c20963/f1p3/3302,c41247/f2p0/3084
chr10	Intron retention	13313468	13314175	+	chr10:13284091-13322192W	c27619/f1p0/2866.1,c14418/f2p0/2132,c17962/f1p0/1881
chr10	Intron retention	13313468	13314208	+	chr10:13284091-13322192W	c27619/f1p0/2866.1,c6488/f1p0/2146
chr10	Intron retention	13313621	13313812	+	chr10:13284091-13322192W	c6488/f1p0/2146,c14418/f2p0/2132,c17962/f1p0/1881
chr10	Alternative 3' splice site	13314175	13314208	+	chr10:13284091-13322192W	c14418/f2p0/2132,c17962/f1p0/1881,c6488/f1p0/2146
chr10	Alternative 5' splice site	13321567	13321571	+	chr10:13284091-13322192W	c17962/f1p0/1881,c14418/f2p0/2132,c27619/f1p0/2866.1,c6488/f1p0/2146
chr10	Intron retention	14431242	14431990	+	chr10:14430968-14436468W	c20942/f1p3/3195,c28118/f5p2/2404,c3904/f3p1/2393,c42807/f1p0/2706
chr10	Intron retention	14433538	14433995	+	chr10:14430968-14436468W	c40829/f1p0/2975,c10812/f1p2/1813,c20942/f1p3/3195,c24986/f1p2/2140,c28118/f5p2/2404,c3470/f1p1/2023,c3904/f3p1/2393
chr10	Intron retention	14433632	14433795	+	chr10:14430968-14436468W	c40829/f1p0/2975,c42807/f1p0/2706
chr10	Intron retention	14435266	14435377	+	chr10:14430968-14436468W	c40829/f1p0/2975,c10812/f1p2/1813,c20942/f1p3/3195,c24986/f1p2/2140,c3470/f1p1/2023,c62415/f1p0/3669.1
chr10	Alternative 5' splice site	14435856	14435857	+	chr10:14430968-14436468W	c3904/f3p1/2393,c42807/f1p0/2706
chr10	Alternative 5' splice site	14436046	14436047	+	chr10:14430968-14436468W	c28118/f5p2/2404,c10812/f1p2/1813,c20942/f1p3/3195,c24986/f1p2/2140,c3470/f1p1/2023,c62415/f1p0/3669.1
chr10	Alternative 5' splice site	14639208	14639176	-	chr10:14634839-14640707C	c19654/f1p0/2997,c32022/f1p1/2333,c36184/f2p3/3129
chr10	Intron retention	14667146	14667882	+	chr10:14665114-14668875W	c56005/f1p0/3778.1,c19780/f1p0/1671
chr10	Alternative 3' splice site	1473434	1473438	+	chr10:1472831-1480391W	c51043/f1p0/3642,c59145/f1p0/3605,c29674/f1p0/2810
chr10	Alternative 5' splice site	15341521	15341520	-	chr10:15340404-15346111C	c3414/f1p1/1733,c10405/f1p0/1617,c1856/f2p0/2116,c24411/f1p1/2184,c5847/f1p0/2077,c6537/f1p1/1968
chr10	Exon skipping	15341882	15341781	-	chr10:15340404-15346111C	c10405/f1p0/1617,c5847/f1p0/2077,c1856/f2p0/2116,c24411/f1p1/2184,c3414/f1p1/1733,c6537/f1p1/1968
chr10	Intron retention	15750270	15750118	-	chr10:15749073-15751357C	c11042/f1p0/1741.1,c30767/f1p0/1015
chr10	Alternative 5' splice site	16001308	16001307	-	chr10:15986498-16257948C	c23206/f1p3/2801,c20911/f2p3/2849,c26652/f3p6/2756,c40519/f1p0/2959.1,c41250/f1p4/2738,c45025/f1p2/2903
chr10	Intron retention	16252915	16252798	-	chr10:15986498-16257948C	c12865/f1p0/1839,c18026/f1p0/1742
chr10	Alternative 3' splice site	16318977	16318992	+	chr10:16317311-16331212W	c6766/f1p1/1815,c5851/f1p1/1774
chr10	Alternative 5' splice site	16971933	16971969	+	chr10:16963289-16973197W	c52552/f1p0/3949,c50265/f1p2/4112,c51053/f1p0/4101
chr10	Alternative 5' splice site	16971933	16971969	+	chr10:16963893-16973147W	c62400/f1p1/3837,c31616/f1p1/2931,c34566/f1p2/3057,c39246/f1p2/2820,c51900/f1p0/11123.2,c54490/f1p0/3847
chr10	Alternative 5' splice site	17019203	17018573	-	chr10:17017115-17021834C	c24217/f1p0/2876,c33114/f1p1/3393.1,c6140/f1p0/2085,c22751/f1p0/3108
chr10	Exon skipping	17020619	17020416	-	chr10:17017115-17021834C	c22751/f1p0/3108,c33114/f1p1/3393.1,c6140/f1p0/2085,c24217/f1p0/2876
chr10	Alternative 5' splice site	17919032	17919046	+	chr10:17906349-17919851W	c5559/f1p0/1749,c16278/f1p0/1656
chr10	Intron retention	17919032	17919154	+	chr10:17906349-17919851W	c3881/f1p0/1898,c5559/f1p0/1749
chr10	Intron retention	17919046	17919154	+	chr10:17906349-17919851W	c3881/f1p0/1898,c16278/f1p0/1656
chr10	Intron retention	18114899	18113742	-	chr10:18112845-18120836C	c60141/f1p1/3785,c13817/f3p3/2761,c25763/f5p4/2705,c31101/f1p0/1140,c32779/f1p0/2509,c40742/f1p1/2822,c43666/f1p4/2724,c48580/f1p2/2618
chr10	Intron retention	18115226	18115152	-	chr10:18112845-18120836C	c60141/f1p1/3785,c40742/f1p1/2822
chr10	Intron retention	18115485	18115351	-	chr10:18112845-18120836C	c40742/f1p1/2822,c13817/f3p3/2761,c32779/f1p0/2509
chr10	Intron retention	18115485	18115152	-	chr10:18112845-18120836C	c60141/f1p1/3785,c13817/f3p3/2761,c32779/f1p0/2509
chr10	Alternative 5' splice site	18118620	18118612	-	chr10:18112845-18120836C	c60141/f1p1/3785,c13817/f3p3/2761,c25763/f5p4/2705,c32779/f1p0/2509,c40742/f1p1/2822,c43666/f1p4/2724,c48580/f1p2/2618
chr10	Intron retention	18221978	18222080	+	chr10:18221109-18223052W	c10089/f1p0/1668,c36098/f1p0/1393
chr10	Intron retention	18286225	18286294	+	chr10:18283668-18288898W	c8942/f1p0/1847,c12535/f1p2/1978,c1331/f4p3/1817
chr10	Intron retention	18391519	18391632	+	chr10:18379971-18405943W	c8677/f1p1/1832,c2903/f1p0/1717,c6508/f1p1/1780
chr10	Alternative 5' splice site	18417369	18417357	-	chr10:18406822-18437442C	c54049/f1p0/3754,c61247/f1p0/4822.3
chr10	Intron retention	18460986	18461104	+	chr10:18459546-18463823W	c62172/f1p0/3872,c40985/f1p0/2683
chr10	Alternative 3' splice site	18634134	18634144	+	chr10:18629390-18636641W	c47664/f1p0/3684,c61039/f1p1/3203.1,c62161/f1p0/3464.1
chr10	Intron retention	19388396	19388366	-	chr10:19388275-19391437C	c22869/f1p0/2009,c29459/f1p1/2667
chr10	Intron retention	19399959	19399862	-	chr10:19395354-19400977C	c33320/f1p0/2864,c17740/f1p1/2062,c21724/f1p0/1823,c9332/f1p1/2012
chr10	Intron retention	19424031	19423895	-	chr10:19421339-19434407C	c45883/f1p2/3914,c15059/f1p0/2599,c19569/f1p0/2875,c33959/f1p5/3237,c37792/f22p22/4030,c38613/f10p21/4127,c43929/f4p8/3830,c51736/f1p3/3495,c53376/f1p0/3936,c55944/f1p1/3994,c56384/f1p0/3651,c59141/f1p1/4059.2,c59301/f1p0/4364.1,c60427/f1p0/4092.1
chr10	Alternative 3' splice site	19433357	19433334	-	chr10:19421339-19434407C	c37792/f22p22/4030,c38613/f10p21/4127,c43929/f4p8/3830,c45883/f1p2/3914,c53376/f1p0/3936,c59301/f1p0/4364.2,c60427/f1p0/4092.2,c55944/f1p1/3994
chr10	Alternative 3' splice site	19433584	19433557	-	chr10:19421339-19434407C	c37792/f22p22/4030,c38613/f10p21/4127,c43929/f4p8/3830,c45883/f1p2/3914,c53376/f1p0/3936,c55944/f1p1/3994,c59301/f1p0/4364.2,c60427/f1p0/4092.2
chr10	Intron retention	1948952	1948883	-	chr10:1947655-1954196C	c24399/f1p0/3159,c62546/f1p0/3797.1,c34602/f1p0/3145.2,c52447/f1p0/3452.1
chr10	Intron retention	1952493	1951984	-	chr10:1947655-1954196C	c54297/f1p0/3756,c24399/f1p0/3159,c52447/f1p0/3452.2,c62546/f1p0/3797.2
chr10	Intron retention	19596804	19595992	-	chr10:19594978-19598529C	c29628/f1p0/2897,c21517/f1p1/2074
chr10	Intron retention	20861256	20861171	-	chr10:20669949-21094974C	c9399/f1p0/1652,c9859/f1p0/1883
chr10	Intron retention	20862201	20861966	-	chr10:20669949-21094974C	c9859/f1p0/1883,c9399/f1p0/1652
chr10	Exon skipping	2090202	2090227	+	chr10:2088896-2092750W	c39980/f1p0/2741,c43626/f1p0/2796
chr10	Alternative 5' splice site	21940474	21940487	+	chr10:21937737-21944529W	c43194/f1p0/4056,c53061/f1p0/3566,c59166/f1p0/3785
chr10	Intron retention	22304364	22304115	-	chr10:22301380-22305236C	c4338/f1p0/1803,c11144/f2p0/1702,c1829/f2p0/1660,c6898/f1p0/1685
chr10	Intron retention	22323227	22323723	+	chr10:22319435-22324750W	c41286/f1p0/2697,c27462/f1p0/2457,c9642/f1p1/2086
chr10	Alternative 3' splice site	227014	226992	-	chr10:224101-230057C	c56243/f1p0/3831,c43849/f1p0/3922
chr10	Alternative 3' splice site	228215	228199	-	chr10:224101-230057C	c43849/f1p0/3922,c56243/f1p0/3831
chr10	Alternative 5' splice site	228925	228825	-	chr10:224101-230057C	c56243/f1p0/3831,c43849/f1p0/3922
chr10	Intron retention	22492915	22492817	-	chr10:22491354-22493908C	c17049/f1p0/3400.1,c20609/f1p0/3163.1
chr10	Alternative 5' splice site	22658102	22658105	+	chr10:22653758-22658975W	c35408/f1p0/2646,c31174/f1p1/2504
chr10	Alternative 3' splice site	22801409	22801466	+	chr10:22801069-22803429W	c5269/f1p0/2019,c25154/f1p1/1631
chr10	Alternative 3' splice site	22827016	22827019	+	chr10:22820358-22830262W	c49871/f4p1/3848,c57118/f1p1/4025,c17297/f3p1/2863,c59128/f1p1/3695
chr10	Intron retention	22832141	22831966	-	chr10:22830436-22834636C	c33526/f1p0/3041,c43277/f1p0/2784
chr10	Intron retention	22832310	22832226	-	chr10:22830436-22834636C	c43277/f1p0/2784,c20200/f1p1/2170,c23230/f1p2/2769,c33207/f1p1/2824,c34515/f1p1/2714
chr10	Intron retention	22832310	22831966	-	chr10:22830436-22834636C	c33526/f1p0/3041,c20200/f1p1/2170,c23230/f1p2/2769,c33207/f1p1/2824,c34515/f1p1/2714
chr10	Intron retention	22833459	22833094	-	chr10:22830436-22834636C	c23230/f1p2/2769,c33207/f1p1/2824,c33526/f1p0/3041,c34515/f1p1/2714,c43277/f1p0/2784,c20200/f1p1/2170
chr10	Intron retention	23110318	23110230	-	chr10:23108334-23704284C	c45490/f1p0/2997.1,c29599/f1p0/2972,c32346/f1p0/3383,c45002/f1p0/3053,c46204/f1p0/3168,c56640/f1p3/3953
chr10	Intron retention	23111706	23111629	-	chr10:23108334-23704284C	c29599/f1p0/2972,c32346/f1p0/3383,c45002/f1p0/3053,c46204/f1p0/3168,c56640/f1p3/3953,c45490/f1p0/2997.1
chr10	Intron retention	23761273	23761365	+	chr10:23757175-23762482W	c49862/f2p2/3857,c42605/f3p1/3723,c42981/f1p2/3784,c49626/f2p1/3819,c51711/f1p0/3653,c56234/f1p0/3636
chr10	Intron retention	23761440	23761699	+	chr10:23757175-23762482W	c49862/f2p2/3857,c31330/f1p1/3543
chr10	Intron retention	23762115	23762235	+	chr10:23757175-23762482W	c42981/f1p2/3784,c49862/f2p2/3857,c42605/f3p1/3723
chr10	Alternative 3' splice site	253219	253218	-	chr10:248454-254244C	c38206/f6p12/4049,c38953/f2p7/4115,c53086/f1p3/4208
chr10	Alternative 3' splice site	25121981	25121983	+	chr10:25119664-25126403W	c14554/f2p3/1948,c3154/f1p0/2550,c4611/f3p3/1949,c5857/f2p3/2067,c18674/f1p3/1831
chr10	Intron retention	26441417	26441338	-	chr10:26437847-26446983C	c15312/f1p1/3301,c13796/f7p2/2905,c25534/f1p0/2828,c53694/f1p1/3810.1
chr10	Alternative 5' splice site	26505037	26505078	+	chr10:26499084-26506141W	c22120/f1p0/2823,c38231/f4p0/3907,c45480/f1p0/3648,c49824/f1p0/3626,c61252/f1p0/3817,c23699/f1p0/2728,c36305/f1p0/2876
chr10	Alternative 3' splice site	26531502	26531503	+	chr10:26530365-26536805W	c22431/f1p1/3331,c27805/f1p0/3388,c47803/f1p0/3296,c50811/f1p0/3444
chr10	Alternative 5' splice site	26536088	26536126	+	chr10:26530365-26536805W	c22431/f1p1/3331,c27805/f1p0/3388,c50811/f1p0/3444
chr10	Alternative 3' splice site	26836573	26836588	+	chr10:26833535-26839410W	c15918/f1p0/2078,c23608/f1p0/2133,c6050/f1p0/2038
chr10	Exon skipping	27009826	27009805	-	chr10:27004303-27010279C	c30976/f1p4/3367,c60934/f1p1/3378
chr10	Exon skipping	27009826	27009805	-	chr10:27004303-27010279C	c27430/f1p0/3273,c43188/f1p2/3348
chr10	Alternative 3' splice site	27027673	27027670	-	chr10:27026085-27030425C	c16536/f1p0/2066,c63031/f1p0/2168
chr10	Intron retention	27027745	27027673	-	chr10:27026085-27030425C	c15296/f1p0/2245,c16536/f1p0/2066
chr10	Intron retention	27027745	27027670	-	chr10:27026085-27030425C	c15296/f1p0/2245,c63031/f1p0/2168
chr10	Alternative 5' splice site	27874852	27874892	+	chr10:27854163-27886664W	c27939/f1p0/3300,c34169/f1p2/3246,c35640/f2p3/3226,c45296/f1p0/3073,c48430/f2p2/3139,c59621/f1p2/3868,c53621/f1p2/3781
chr10	Alternative 5' splice site	27877669	27877670	+	chr10:27854163-27886664W	c48430/f2p2/3139,c27939/f1p0/3300,c34169/f1p2/3246,c35640/f2p3/3226,c45296/f1p0/3073,c53621/f1p2/3781
chr10	Intron retention	27881473	27881957	+	chr10:27854163-27886664W	c53621/f1p2/3781,c27939/f1p0/3300,c34169/f1p2/3246,c35640/f2p3/3226,c45296/f1p0/3073,c48430/f2p2/3139,c59621/f1p2/3868
chr10	Intron retention	27882321	27882478	+	chr10:27854163-27886664W	c53621/f1p2/3781,c34169/f1p2/3246,c35640/f2p3/3226,c45296/f1p0/3073,c48430/f2p2/3139,c59621/f1p2/3868
chr10	Intron retention	27882559	27882633	+	chr10:27854163-27886664W	c27939/f1p0/3300,c34169/f1p2/3246,c35640/f2p3/3226,c45296/f1p0/3073,c59621/f1p2/3868
chr10	Intron retention	27882559	27882721	+	chr10:27854163-27886664W	c27939/f1p0/3300,c48430/f2p2/3139
chr10	Intron retention	27882651	27882721	+	chr10:27854163-27886664W	c34169/f1p2/3246,c35640/f2p3/3226,c45296/f1p0/3073,c53621/f1p2/3781,c59621/f1p2/3868,c48430/f2p2/3139
chr10	Intron retention	28384887	28384981	+	chr10:28379695-28392574W	c12803/f1p0/1685,c2892/f1p0/1594,c40738/f1p0/2886,c6296/f1p0/1561,c6901/f1p0/1541
chr10	Alternative 3' splice site	28389058	28389086	+	chr10:28379695-28392574W	c5985/f1p0/2085,c40738/f1p0/2886
chr10	Intron retention	28576566	28576665	+	chr10:28574634-28578173W	c12519/f1p0/1577,c17220/f1p0/1693,c3080/f1p0/1668
chr10	Intron retention	28681966	28681872	-	chr10:28679789-28683314C	c61270/f1p0/3794.3,c4118/f1p0/1579
chr10	Alternative 3' splice site	29097390	29097312	-	chr10:29092600-29101665C	c55942/f1p1/3885,c52580/f1p0/4132,c61406/f1p0/4000
chr10	Intron retention	29287883	29288570	+	chr10:29283549-29289660W	c62464/f1p4/3230,c15701/f1p2/2744
chr10	Intron retention	29708928	29709026	+	chr10:29653189-29760587W	c8635/f1p0/1757,c10092/f1p0/1610,c10667/f14p6/1590,c12429/f1p0/1591,c1296/f1p0/1658,c1301/f2p1/1642,c258/f10p3/1583,c300/f3p5/1613,c3538/f1p2/1949,c4512/f1p0/1702,c5782/f1p0/2117
chr10	Intron retention	29709184	29709268	+	chr10:29653189-29760587W	c15053/f1p0/1590,c10092/f1p0/1610,c10667/f14p6/1590,c12429/f1p0/1591,c1301/f2p1/1642,c258/f10p3/1583,c300/f3p5/1613,c3538/f1p2/1949,c5782/f1p0/2117
chr10	Intron retention	29709184	29711118	+	chr10:29653189-29760587W	c28636/f1p0/2663,c8635/f1p0/1757
chr10	Intron retention	29709435	29709581	+	chr10:29653189-29760587W	c1296/f1p0/1658,c8635/f1p0/1757,c10092/f1p0/1610,c10667/f14p6/1590,c12429/f1p0/1591,c1301/f2p1/1642,c258/f10p3/1583,c300/f3p5/1613,c3538/f1p2/1949
chr10	Intron retention	29709435	29709862	+	chr10:29653189-29760587W	c4512/f1p0/1702,c10092/f1p0/1610,c10667/f14p6/1590,c12429/f1p0/1591,c1301/f2p1/1642,c258/f10p3/1583,c300/f3p5/1613
chr10	Intron retention	29709741	29709862	+	chr10:29653189-29760587W	c4512/f1p0/1702,c1296/f1p0/1658,c8635/f1p0/1757
chr10	Intron retention	29709741	29710481	+	chr10:29653189-29760587W	c5782/f1p0/2117,c10092/f1p0/1610,c10667/f14p6/1590,c12429/f1p0/1591,c1301/f2p1/1642,c15053/f1p0/1590,c258/f10p3/1583,c300/f3p5/1613
chr10	Intron retention	29709741	29709862	+	chr10:29653189-29760587W	c5782/f1p0/2117,c3538/f1p2/1949
chr10	Intron retention	29709923	29710481	+	chr10:29653189-29760587W	c3538/f1p2/1949,c10092/f1p0/1610,c10667/f14p6/1590,c12429/f1p0/1591,c1296/f1p0/1658,c1301/f2p1/1642,c15053/f1p0/1590,c258/f10p3/1583,c300/f3p5/1613,c8635/f1p0/1757
chr10	Intron retention	29711031	29711118	+	chr10:29653189-29760587W	c44331/f1p2/2465,c10667/f14p6/1590
chr10	Alternative 3' splice site	29758074	29758092	+	chr10:29653189-29760587W	c11041/f1p0/2375,c23300/f1p1/1795
chr10	Intron retention	29805296	29805197	-	chr10:29802813-29807034C	c30624/f1p0/2914,c32062/f1p0/3022,c14405/f2p5/2927,c15228/f1p0/3462,c29905/f1p0/3093.1,c33316/f1p2/3062,c42793/f1p4/2902,c44093/f1p0/2968.2,c45267/f1p3/2881,c45595/f1p0/3699,c58636/f2p4/2989
chr10	Intron retention	29806708	29805888	-	chr10:29802813-29807034C	c55781/f1p2/3781,c58636/f2p4/2989
chr10	Intron retention	29811401	29811278	-	chr10:29808780-29815539C	c39792/f1p3/3709,c11257/f1p0/1818,c29585/f1p4/3479,c30120/f21p22/3688,c34485/f1p0/3303,c42197/f1p1/3607,c4417/f1p0/2061,c44176/f2p9/3749,c60176/f1p0/3470
chr10	Intron retention	29812504	29812350	-	chr10:29808780-29815539C	c42197/f1p1/3607,c29585/f1p4/3479,c30120/f21p22/3688,c34485/f1p0/3303,c39792/f1p3/3709,c4417/f1p0/2061,c44176/f2p9/3749,c51494/f1p0/6713.1,c60176/f1p0/3470,c60390/f1p0/4002.1,c62250/f1p0/4032.1
chr10	Intron retention	29813654	29813566	-	chr10:29808780-29815539C	c29585/f1p4/3479,c30120/f21p22/3688,c34485/f1p0/3303,c39792/f1p3/3709,c42197/f1p1/3607,c44176/f2p9/3749,c51494/f1p0/6713.1,c60390/f1p0/4002.1,c62250/f1p0/4032.1,c60176/f1p0/3470
chr10	Intron retention	29938372	29939463	+	chr10:29935299-29941176W	c54417/f1p0/3818,c57162/f1p0/3786.1
chr10	Intron retention	30078314	30078331	+	chr10:30074124-30084391W	c22832/f1p4/3166,c32301/f2p6/3229,c32559/f1p0/3120,c36144/f1p1/3202,c41979/f1p0/3286,c45019/f1p4/3311,c60235/f1p1/3219,c61673/f1p2/3722,c30502/f1p6/3248
chr10	Alternative 3' splice site	30078329	30078331	+	chr10:30074124-30084391W	c32133/f1p0/3115,c30502/f1p6/3248,c52490/f1p3/4004
chr10	Intron retention	30220767	30220658	-	chr10:30212681-30222437C	c45852/f1p0/2758.1,c10856/f1p2/1851
chr10	Exon skipping	30443664	30443581	-	chr10:30421505-30643113C	c17039/f1p0/3125,c57629/f1p0/3836
chr10	Intron retention	30554125	30554292	+	chr10:30552323-30600327W	c56961/f1p1/3820,c47376/f1p1/3282
chr10	Intron retention	30555686	30555783	+	chr10:30552323-30600327W	c60709/f1p0/3659,c13975/f5p1/3279,c14646/f3p0/3146,c17884/f1p1/3026,c18810/f1p0/2874,c27738/f3p1/3142,c28372/f2p1/3168,c29046/f1p1/3417,c42262/f1p0/3585,c45670/f1p1/2895,c48345/f3p2/3230,c48667/f1p0/3105,c51118/f1p1/3775,c56961/f1p1/3820
chr10	Intron retention	30555832	30555925	+	chr10:30552323-30600327W	c47376/f1p1/3282,c53097/f1p0/4034,c13975/f5p1/3279,c14646/f3p0/3146,c17884/f1p1/3026,c18810/f1p0/2874,c27738/f3p1/3142,c28372/f2p1/3168,c29046/f1p1/3417,c42262/f1p0/3585,c45670/f1p1/2895,c48345/f3p2/3230,c48667/f1p0/3105,c51118/f1p1/3775,c56961/f1p1/3820
chr10	Alternative 5' splice site	30556198	30556203	+	chr10:30552323-30600327W	c13975/f5p1/3279,c14646/f3p0/3146,c17884/f1p1/3026,c18810/f1p0/2874,c27738/f3p1/3142,c28372/f2p1/3168,c29046/f1p1/3417,c42262/f1p0/3585,c45670/f1p1/2895,c47376/f1p1/3282,c48345/f3p2/3230,c48667/f1p0/3105,c4958/f1p0/2060,c51118/f1p1/3775,c53097/f1p0/4034,c60709/f1p0/3659,c56961/f1p1/3820
chr10	Intron retention	30560734	30560824	+	chr10:30552323-30600327W	c53097/f1p0/4034,c13975/f5p1/3279,c14646/f3p0/3146,c17884/f1p1/3026,c18810/f1p0/2874,c27738/f3p1/3142,c28372/f2p1/3168,c29046/f1p1/3417,c42262/f1p0/3585,c45670/f1p1/2895,c47376/f1p1/3282,c48345/f3p2/3230,c48667/f1p0/3105,c4958/f1p0/2060,c51118/f1p1/3775,c56961/f1p1/3820,c60709/f1p0/3659
chr10	Alternative 5' splice site	30561972	30562225	+	chr10:30552323-30600327W	c27738/f3p1/3142,c36455/f1p0/1158,c56961/f1p1/3820,c4958/f1p0/2060
chr10	Intron retention	30676106	30676187	+	chr10:30670028-30677734W	c41449/f1p0/2792,c30517/f2p0/2732
chr10	Intron retention	30834788	30834883	+	chr10:30834012-30841202W	c53756/f1p0/3823.1,c27315/f1p1/3263,c30009/f1p0/3358,c38763/f2p1/3358,c61971/f1p1/3715
chr10	Alternative 3' splice site	30839543	30839865	+	chr10:30834012-30841202W	c61971/f1p1/3715,c38763/f2p1/3358,c9666/f1p0/2123
chr10	Exon skipping	31147438	31147364	-	chr10:31146289-31203362C	c17005/f1p0/3001,c51745/f1p0/3895
chr10	Alternative 5' splice site	31193037	31193036	-	chr10:31146289-31203362C	c17005/f1p0/3001,c51745/f1p0/3895
chr10	Intron retention	31584910	31584993	+	chr10:31580744-31590757W	c11201/f1p0/2186.2,c40317/f1p1/3257
chr10	Intron retention	31925746	31925824	+	chr10:31923508-31929827W	c11008/f1p1/1836,c3401/f1p1/1777
chr10	Alternative 3' splice site	3205143	3205130	-	chr10:3203996-3211207C	c21509/f6p5/3201,c39613/f1p1/2714,c39285/f1p0/3764
chr10	Intron retention	32193587	32193456	-	chr10:32192670-32198659C	c15587/f1p0/3012,c26181/f6p5/2958,c33374/f1p7/3033
chr10	Alternative 3' splice site	32338240	32338259	+	chr10:32324837-32484376W	c25349/f1p1/2055,c3674/f1p1/1821,c25131/f1p1/2153
chr10	Alternative 3' splice site	32483009	32483018	+	chr10:32324837-32484376W	c25349/f1p1/2055,c25131/f1p1/2153
chr10	Intron retention	32344237	32344106	-	chr10:32343409-32349375C	c35927/f1p0/3200,c13523/f6p3/2971,c18882/f1p2/2552,c26170/f9p7/2896,c32879/f1p0/2817,c46685/f1p0/3127
chr10	Intron retention	32430646	32432134	+	chr10:32428863-32434361W	c43438/f1p0/3446,c4831/f1p0/2044
chr10	Intron retention	32433064	32433513	+	chr10:32428863-32434361W	c43438/f1p0/3446,c4831/f1p0/2044
chr10	Alternative 5' splice site	33042000	33042112	+	chr10:33037720-33043030W	c13550/f11p3/2832,c15179/f5p3/2802,c29210/f1p0/7104.2,c31481/f1p1/2836
chr10	Intron retention	33291423	33291560	+	chr10:33289437-33292021W	c4717/f1p2/1927,c1714/f4p0/1864
chr10	Alternative 3' splice site	33295793	33295772	-	chr10:33294718-33301984C	c45860/f5p5/3733,c37570/f24p8/3730,c52105/f1p2/3613,c53851/f1p0/3893.1,c63127/f2p1/3855
chr10	Intron retention	33295865	33295793	-	chr10:33294718-33301984C	c51519/f1p1/3791,c57890/f14p6/3725,c45860/f5p5/3733
chr10	Intron retention	33295865	33295772	-	chr10:33294718-33301984C	c51519/f1p1/3791,c57890/f14p6/3725,c37570/f24p8/3730,c52105/f1p2/3613,c53851/f1p0/3893.1,c63127/f2p1/3855
chr10	Intron retention	33295865	33295772	-	chr10:33294718-33301984C	c49636/f2p3/3785,c38446/f1p0/3861,c45510/f1p2/3451,c49409/f3p3/3629
chr10	Alternative 3' splice site	33295989	33295971	-	chr10:33294718-33301984C	c37570/f24p8/3730,c38446/f1p0/3861,c45510/f1p2/3451,c45860/f5p5/3733,c49409/f3p3/3629,c50877/f1p0/8247.1,c52105/f1p2/3613,c53851/f1p0/3893.1,c63127/f2p1/3855,c45990/f2p3/3715
chr10	Alternative 3' splice site	33295989	33295971	-	chr10:33294718-33301984C	c58872/f12p4/3741,c33132/f1p0/2679,c55959/f1p0/3674
chr10	Intron retention	33297759	33297656	-	chr10:33294718-33301984C	c51519/f1p1/3791,c33132/f1p0/2679,c37570/f24p8/3730,c38446/f1p0/3861,c45510/f1p2/3451,c45860/f5p5/3733,c45990/f2p3/3715,c49409/f3p3/3629,c49597/f2p4/3854,c49636/f2p3/3785,c50877/f1p0/8247.1,c52105/f1p2/3613,c53851/f1p0/3893.1,c54435/f1p0/3950,c54673/f1p3/3683,c55959/f1p0/3674,c56233/f1p0/3851.1,c57890/f14p6/3725,c58872/f12p4/3741,c61768/f1p0/3590,c63127/f2p1/3855
chr10	Intron retention	33298660	33298553	-	chr10:33294718-33301984C	c49948/f3p1/3817,c33132/f1p0/2679,c37570/f24p8/3730,c38446/f1p0/3861,c45510/f1p2/3451,c45860/f5p5/3733,c45990/f2p3/3715,c49409/f3p3/3629,c49597/f2p4/3854,c49636/f2p3/3785,c50877/f1p0/8247.1,c52105/f1p2/3613,c53851/f1p0/3893.1,c54435/f1p0/3950,c54673/f1p3/3683,c55959/f1p0/3674,c56233/f1p0/3851.1,c57890/f14p6/3725,c58872/f12p4/3741,c61768/f1p0/3590,c63127/f2p1/3855
chr10	Alternative 5' splice site	33301388	33301222	-	chr10:33294718-33301984C	c57890/f14p6/3725,c38446/f1p0/3861
chr10	Alternative 5' splice site	33301388	33301222	-	chr10:33294718-33301984C	c37570/f24p8/3730,c49636/f2p3/3785,c58872/f12p4/3741,c63127/f2p1/3855
chr10	Intron retention	33301628	33301562	-	chr10:33294718-33301984C	c45990/f2p3/3715,c54673/f1p3/3683
chr10	Intron retention	33301684	33301588	-	chr10:33294718-33301984C	c45990/f2p3/3715,c52105/f1p2/3613
chr10	Intron retention	33927203	33927311	+	chr10:33926893-33931218W	c35913/f1p0/3284.1,c60678/f1p0/3167.1
chr10	Alternative 3' splice site	33992868	33992872	+	chr10:33957400-34005526W	c50345/f1p0/3415,c18732/f1p1/3379
chr10	Mutually exclusive exon	34953748	35023874	+	chr10:34807002-35024462W	c3277/f1p2/1636,c8789/f1p0/2117.1
chr10	Intron retention	35747867	35747747	-	chr10:35746695-35753753C	c8066/f1p0/1823,c2239/f2p0/1646
chr10	Exon skipping	35751238	35751047	-	chr10:35746695-35753753C	c2239/f2p0/1646,c52812/f1p0/3827.1,c6357/f1p0/2410,c8066/f1p0/1823
chr10	Intron retention	35753062	35752928	-	chr10:35746695-35753753C	c2239/f2p0/1646,c6357/f1p0/2410,c8066/f1p0/1823
chr10	Intron retention	36312242	36312157	-	chr10:36310604-36315259C	c52714/f1p0/3966.1,c55564/f1p2/3777,c59039/f2p5/3813
chr10	Alternative 5' splice site	36675740	36675719	-	chr10:36674837-36683990C	c24527/f1p2/3199,c35405/f1p2/3315,c39002/f1p0/3495,c41728/f1p0/3239,c43311/f1p0/3653.1,c14239/f4p3/3335,c15245/f1p0/3184,c15728/f1p0/3263,c18468/f1p1/3010,c18639/f1p0/3161.1,c23747/f6p7/3209,c27617/f2p0/3038,c3131/f1p0/1935,c33236/f4p5/3381,c40446/f1p0/3614.1,c43279/f1p0/4005,c55610/f1p2/3362,c63165/f2p3/3199
chr10	Exon skipping	36676759	36675719	-	chr10:36674837-36683990C	c35252/f1p0/2916,c14239/f4p3/3335,c15245/f1p0/3184,c15728/f1p0/3263,c18468/f1p1/3010,c18639/f1p0/3161.1,c23747/f6p7/3209,c27617/f2p0/3038,c3131/f1p0/1935,c33236/f4p5/3381,c40446/f1p0/3614.1,c43279/f1p0/4005,c55610/f1p2/3362,c63165/f2p3/3199
chr10	Exon skipping	36676759	36675740	-	chr10:36674837-36683990C	c35252/f1p0/2916,c24527/f1p2/3199,c35405/f1p2/3315,c39002/f1p0/3495,c41728/f1p0/3239,c43311/f1p0/3653.1
chr10	Intron retention	36679259	36678869	-	chr10:36674837-36683990C	c39002/f1p0/3495,c14239/f4p3/3335,c15245/f1p0/3184,c15728/f1p0/3263,c18468/f1p1/3010,c18639/f1p0/3161.1,c23747/f6p7/3209,c24527/f1p2/3199,c27617/f2p0/3038,c33236/f4p5/3381,c35252/f1p0/2916,c35405/f1p2/3315,c40446/f1p0/3614.1,c41728/f1p0/3239,c43279/f1p0/4005,c55610/f1p2/3362,c63165/f2p3/3199
chr10	Alternative 5' splice site	36680236	36680167	-	chr10:36674837-36683990C	c15245/f1p0/3184,c14239/f4p3/3335,c15728/f1p0/3263,c18468/f1p1/3010,c18639/f1p0/3161.1,c23747/f6p7/3209,c24527/f1p2/3199,c27617/f2p0/3038,c33236/f4p5/3381,c35252/f1p0/2916,c35405/f1p2/3315,c39002/f1p0/3495,c41728/f1p0/3239,c43279/f1p0/4005,c43311/f1p0/3653.2,c55610/f1p2/3362,c63165/f2p3/3199
chr10	Exon skipping	36682694	36682559	-	chr10:36674837-36683990C	c14239/f4p3/3335,c15245/f1p0/3184,c15728/f1p0/3263,c18468/f1p1/3010,c18639/f1p0/3161.2,c23747/f6p7/3209,c24527/f1p2/3199,c27617/f2p0/3038,c33236/f4p5/3381,c35252/f1p0/2916,c35405/f1p2/3315,c39002/f1p0/3495,c41728/f1p0/3239,c43279/f1p0/4005,c43311/f1p0/3653.2,c63165/f2p3/3199,c55610/f1p2/3362
chr10	Intron retention	36790328	36790441	+	chr10:36789463-36793627W	c29202/f1p0/2701.1,c34390/f1p0/2384,c39248/f1p0/2482
chr10	Alternative 3' splice site	36886589	36886592	+	chr10:36885842-36888709W	c16630/f1p0/1700,c1276/f6p0/1638
chr10	Alternative 3' splice site	37090393	37090423	+	chr10:37073082-37091100W	c17569/f1p0/2592,c54033/f1p0/3941
chr10	Alternative 3' splice site	37437584	37437660	+	chr10:37437234-37441323W	c24343/f1p0/1852,c1676/f4p2/1670,c2655/f3p2/1803
chr10	Alternative 5' splice site	37765335	37765315	-	chr10:37761404-37767089C	c31692/f1p1/2893,c15536/f1p0/1912,c22835/f1p0/1867
chr10	Alternative 3' splice site	37766449	37766428	-	chr10:37761404-37767089C	c22835/f1p0/1867,c31692/f1p1/2893,c15536/f1p0/1912
chr10	Alternative 3' splice site	38201596	38201595	-	chr10:38195280-38202596C	c38147/f1p0/3814.1,c48586/f2p0/3858,c49416/f5p0/3737,c52904/f1p0/3783,c53026/f1p0/3429,c57705/f1p0/3627,c61168/f1p0/9464.2,c62109/f1p0/3454,c62459/f1p0/3740,c42739/f1p0/3740,c49937/f2p0/3775,c55912/f1p0/3630
chr10	Alternative 3' splice site	38309734	38309794	+	chr10:38305973-38314270W	c47332/f1p0/2711,c18636/f1p0/2594
chr10	Intron retention	38688438	38689510	+	chr10:38686487-38691174W	c30166/f1p2/2832,c11235/f1p6/1628,c14720/f2p7/1785,c14731/f2p0/1684,c157/f8p10/1893,c26043/f29p13/1901,c4441/f1p1/2067.1
chr10	Intron retention	38690095	38690296	+	chr10:38686487-38691174W	c30166/f1p2/2832,c11235/f1p6/1628,c14720/f2p7/1785,c14731/f2p0/1684,c157/f8p10/1893,c26043/f29p13/1901,c4441/f1p1/2067.1
chr10	Intron retention	38761901	38761414	-	chr10:38759664-38762694C	c21403/f1p0/3590.1,c30103/f1p0/877
chr10	Intron retention	39218027	39218117	+	chr10:39215598-39220795W	c7703/f1p0/2009,c9959/f1p0/1851
chr10	Alternative 3' splice site	3954977	3954928	-	chr10:3952655-3958300C	c24453/f1p0/2019,c11978/f1p0/1665,c7140/f1p0/1824
chr10	Intron retention	3956316	3955833	-	chr10:3952655-3958300C	c24453/f1p0/2019,c11978/f1p0/1665,c7140/f1p0/1824
chr10	Exon skipping	3956364	3956094	-	chr10:3952655-3958300C	c62903/f1p1/3386.1,c11978/f1p0/1665,c7140/f1p0/1824
chr10	Alternative 3' splice site	3956364	3955833	-	chr10:3952655-3958300C	c24453/f1p0/2019,c62903/f1p1/3386.1
chr10	Alternative 5' splice site	39975723	39975710	-	chr10:39966010-39979017C	c3712/f1p0/1499,c6097/f1p0/1797,c6926/f1p0/1646
chr10	Alternative 5' splice site	39987328	39987338	+	chr10:39983358-39990928W	c29059/f1p0/2654,c3828/f1p0/2131,c52520/f1p0/4578.1.1,c42481/f1p0/2739
chr10	Alternative 5' splice site	39988458	39989061	+	chr10:39983358-39990928W	c24311/f1p0/1611,c29059/f1p0/2654,c3828/f1p0/2131,c42481/f1p0/2739
chr10	Intron retention	39989431	39989496	+	chr10:39983358-39990928W	c24311/f1p0/1611,c29059/f1p0/2654,c3828/f1p0/2131,c42481/f1p0/2739
chr10	Alternative 3' splice site	40212835	40212793	-	chr10:40151742-40681719C	c37226/f1p0/3191,c17654/f1p0/2917
chr10	Exon skipping	40215079	40214928	-	chr10:40151742-40681719C	c17654/f1p0/2917,c27030/f2p2/3245,c28462/f2p1/3012,c37226/f1p0/3191,c62965/f2p0/3088
chr10	Intron retention	40694297	40694194	-	chr10:40691325-40704399C	c21646/f2p1/3067,c42387/f1p1/2961
chr10	Alternative 3' splice site	40704182	40704139	-	chr10:40691325-40704399C	c16223/f7p1/2975,c26499/f2p0/2930
chr10	Alternative 5' splice site	4138475	4138473	-	chr10:4136406-4144022C	c34454/f1p0/2462,c27290/f1p0/2675.1,c34924/f1p0/2584
chr10	Intron retention	41411321	41410592	-	chr10:41408601-41412452C	c29288/f2p0/2622,c6881/f1p0/1951,c9438/f1p0/1921
chr10	Exon skipping	42045917	42045705	-	chr10:42041746-42048404C	c32878/f1p0/2637,c44912/f1p0/2835
chr10	Intron retention	42047587	42047461	-	chr10:42041746-42048404C	c35662/f1p0/2723,c32878/f1p0/2637,c44912/f1p0/2835
chr10	Alternative 5' splice site	42152292	42152312	+	chr10:42055322-42163119W	c26700/f3p3/2999,c27564/f1p2/2723,c14284/f3p1/3016
chr10	Intron retention	4487980	4487818	-	chr10:4487473-4524332C	c20290/f1p0/3280,c42611/f1p1/3106
chr10	Intron retention	4487980	4487897	-	chr10:4487473-4524332C	c33672/f1p0/3121,c44068/f1p0/2981
chr10	Alternative 3' splice site	4488181	4488075	-	chr10:4487473-4524332C	c42611/f1p1/3106,c14240/f3p0/3094
chr10	Intron retention	485743	484908	-	chr10:460212-487219C	c28105/f1p0/3372,c22500/f1p0/2970.1,c41203/f2p3/2945,c41419/f1p0/2653,c44916/f1p2/2836
chr10	Intron retention	485945	485575	-	chr10:460212-487219C	c44269/f1p1/3085,c41419/f1p0/2653,c44916/f1p2/2836
chr10	Intron retention	486183	486060	-	chr10:460212-487219C	c41203/f2p3/2945,c28105/f1p0/3372,c41419/f1p0/2653,c44916/f1p2/2836
chr10	Exon skipping	5317658	5317892	+	chr10:5316155-5377330W	c54994/f1p1/4017,c55949/f1p0/3516
chr10	Intron retention	5324660	5324733	+	chr10:5316155-5377330W	c54994/f1p1/4017,c49738/f2p1/3601,c50001/f2p1/4056,c55949/f1p0/3516
chr10	Alternative 3' splice site	5375037	5375045	+	chr10:5316155-5377330W	c49738/f2p1/3601,c50001/f2p1/4056,c55949/f1p0/3516,c60783/f1p1/4116.1,c54994/f1p1/4017
chr10	Intron retention	6012537	6012641	+	chr10:6011243-6014748W	c31051/f1p0/3499,c26794/f3p1/2702,c29058/f1p0/2673,c43324/f1p0/2652
chr10	Intron retention	6426144	6426019	-	chr10:6424521-6430986C	c48273/f1p0/2841,c39951/f1p3/3605.2,c41981/f1p0/2623,c55384/f1p0/3894.1.1
chr10	Intron retention	6426505	6426291	-	chr10:6424521-6430986C	c39951/f1p3/3605.2,c41981/f1p0/2623,c55384/f1p0/3894.1.1,c35582/f1p0/4050.1
chr10	Intron retention	6426505	6426019	-	chr10:6424521-6430986C	c48273/f1p0/2841,c35582/f1p0/4050.1
chr10	Intron retention	6427660	6427504	-	chr10:6424521-6430986C	c48273/f1p0/2841,c55384/f1p0/3894.1.1,c35582/f1p0/4050.1,c41981/f1p0/2623
chr10	Alternative 3' splice site	6428125	6428105	-	chr10:6424521-6430986C	c48273/f1p0/2841,c55384/f1p0/3894.1.1,c41981/f1p0/2623
chr10	Intron retention	6512407	6511824	-	chr10:6486474-6728103C	c31329/f1p0/2628,c7475/f1p0/2077
chr10	Intron retention	6554649	6554859	+	chr10:6551529-6555798W	c32591/f1p1/2565,c12166/f1p2/1905,c2746/f1p2/1886
chr10	Alternative 3' splice site	725305	725178	-	chr10:720547-728835C	c7639/f1p1/2080,c10576/f1p0/1867,c11359/f1p1/1860,c59539/f1p1/3973,c63770/f1p1/2000,c63810/f3p1/1980
chr10	Intron retention	782170	782294	+	chr10:779745-783085W	c5901/f1p1/1774,c25568/f1p2/1684,c5375/f1p2/3832.3,c63780/f27p8/1660
chr10	Intron retention	8726261	8726382	+	chr10:8724380-8729272W	c53245/f2p12/3448,c32013/f1p1/3317
chr10	Alternative 5' splice site	8727379	8727454	+	chr10:8724380-8729272W	c35136/f1p3/3367,c24080/f1p0/2822,c25227/f2p4/2937,c28055/f1p0/3122
chr10	Alternative 5' splice site	8727379	8727450	+	chr10:8724380-8729272W	c35136/f1p3/3367,c40624/f1p6/2999
chr10	Alternative 5' splice site	8727450	8727454	+	chr10:8724380-8729272W	c40624/f1p6/2999,c24080/f1p0/2822,c25227/f2p4/2937,c28055/f1p0/3122
chr10	Intron retention	8987303	8987229	-	chr10:8985996-9049258C	c54574/f1p0/5221.1,c2736/f1p1/2125,c29695/f1p0/2636,c43976/f1p0/3883.1,c56014/f1p0/3757
chr10	Mutually exclusive exon	9041047	8988505	-	chr10:8985996-9049258C	c2736/f1p1/2125,c43976/f1p0/3883.1,c56014/f1p0/3757,c29695/f1p0/2636
chr10	Intron retention	9042375	9041397	-	chr10:8985996-9049258C	c56014/f1p0/3757,c29695/f1p0/2636,c43976/f1p0/3883.1
chr10	Intron retention	9175678	9175541	-	chr10:9174703-9181325C	c18896/f1p0/3259,c13826/f24p10/2789,c28500/f1p0/2892,c28571/f1p1/3094,c33881/f1p0/2857,c46889/f1p9/2642
chr10	Intron retention	9175858	9175746	-	chr10:9174703-9181325C	c30737/f1p0/3284,c31932/f1p1/2890,c13826/f24p10/2789,c28500/f1p0/2892,c28571/f1p1/3094,c33881/f1p0/2857,c46889/f1p9/2642
chr10	Intron retention	9177464	9177356	-	chr10:9174703-9181325C	c28500/f1p0/2892,c13826/f24p10/2789,c16217/f1p0/3934.1,c18896/f1p0/3259,c28571/f1p1/3094,c30737/f1p0/3284,c31932/f1p1/2890,c33881/f1p0/2857,c46889/f1p9/2642
chr10	Intron retention	9178462	9178395	-	chr10:9174703-9181325C	c33881/f1p0/2857,c13826/f24p10/2789,c16217/f1p0/3934.1,c18896/f1p0/3259,c28500/f1p0/2892,c28571/f1p1/3094,c30737/f1p0/3284,c31932/f1p1/2890,c46889/f1p9/2642
chr10	Exon skipping	9179563	9179487	-	chr10:9174703-9181325C	c13826/f24p10/2789,c28500/f1p0/2892,c31932/f1p1/2890,c33881/f1p0/2857,c46889/f1p9/2642,c16217/f1p0/3934.1
chr10	Intron retention	9179699	9179213	-	chr10:9174703-9181325C	c18896/f1p0/3259,c28571/f1p1/3094,c30737/f1p0/3284,c13826/f24p10/2789,c28500/f1p0/2892,c31932/f1p1/2890,c33881/f1p0/2857,c46889/f1p9/2642
chr10	Intron retention	9179699	9179213	-	chr10:9174703-9181325C	c18896/f1p0/3259,c28571/f1p1/3094,c30737/f1p0/3284,c16217/f1p0/3934.1
chr10	Alternative 3' splice site	9877574	9877579	+	chr10:9876865-9881016W	c2113/f2p0/1655,c14479/f2p0/1618
chr11	Alternative 3' splice site	10009890	10009961	+	chr11:10008815-10013106W	c20176/f1p0/2258,c45828/f1p0/2599,c9545/f1p0/2098
chr11	Alternative 3' splice site	10010692	10010706	+	chr11:10008815-10013106W	c9545/f1p0/2098,c20176/f1p0/2258
chr11	Intron retention	10200263	10200360	+	chr11:10198544-10202262W	c46390/f1p0/2628,c26817/f2p0/2887,c33263/f2p0/2893
chr11	Intron retention	10678736	10679260	+	chr11:10677476-10682564W	c55215/f1p7/3847,c13614/f29p16/3311,c18730/f2p8/2981,c21108/f2p15/3288,c35583/f1p0/4022.1,c35881/f1p0/3515.1,c47733/f1p0/3318,c48460/f1p10/3296,c48888/f4p10/3156,c49109/f28p14/3297
chr11	Alternative 3' splice site	10801654	10801653	-	chr11:10790315-10806513C	c22440/f1p0/3000,c56832/f1p0/12262.1,c52092/f1p6/3933
chr11	Alternative 3' splice site	10801654	10801653	-	chr11:10790358-10806359C	c44481/f1p0/4149,c46654/f3p6/4184
chr11	Alternative 3' splice site	11202619	11202628	+	chr11:11199720-11219893W	c10318/f1p0/1664,c33463/f1p1/1498,c8637/f1p1/1737
chr11	Intron retention	11204229	11204346	+	chr11:11199720-11219893W	c10318/f1p0/1664,c17842/f1p0/1637,c19091/f1p0/1652,c33463/f1p1/1498,c5162/f1p0/1653.1,c8637/f1p1/1737
chr11	Alternative 5' splice site	11278834	11279164	+	chr11:11275517-11280711W	c9148/f1p0/1588,c4453/f1p0/2068.1
chr11	Alternative 3' splice site	113811	114050	+	chr11:113257-119253W	c40017/f2p0/3928,c41420/f3p9/4018,c54048/f1p0/4241,c59811/f1p2/3743
chr11	Alternative 3' splice site	113811	113889	+	chr11:113257-119253W	c40017/f2p0/3928,c41420/f3p9/4018,c49524/f5p3/3899,c49866/f2p5/3989
chr11	Alternative 3' splice site	113889	114050	+	chr11:113257-119253W	c49524/f5p3/3899,c49866/f2p5/3989,c54048/f1p0/4241,c59811/f1p2/3743
chr11	Intron retention	117355	117609	+	chr11:113257-119253W	c36309/f1p1/2738,c40017/f2p0/3928,c41420/f3p9/4018,c47938/f1p2/3023,c49524/f5p3/3899,c49866/f2p5/3989,c54048/f1p0/4241,c57043/f1p0/4277.2,c59811/f1p2/3743
chr11	Intron retention	11373378	11373218	-	chr11:11372187-11689255C	c10/f53p11/1693,c17103/f1p4/1537
chr11	Alternative 5' splice site	17762988	17762987	-	chr11:1-17780139C	c49682/f2p0/4045,c57032/f1p1/3937,c60573/f1p1/3874,c60955/f1p0/3583
chr11	Intron retention	17763173	17763022	-	chr11:1-17780139C	c51279/f1p1/3812,c55263/f1p2/3968,c31477/f1p0/3134
chr11	Intron retention	17763779	17763641	-	chr11:1-17780139C	c31477/f1p0/3134,c47701/f1p0/3829,c60955/f1p0/3583
chr11	Alternative 3' splice site	17765649	17765571	-	chr11:1-17780139C	c57032/f1p1/3937,c47701/f1p0/3829
chr11	Alternative 3' splice site	17765656	17765571	-	chr11:1-17780139C	c31477/f1p0/3134,c49682/f2p0/4045,c51279/f1p1/3812,c55263/f1p2/3968,c60573/f1p1/3874,c60955/f1p0/3583,c47701/f1p0/3829
chr11	Alternative 3' splice site	17765656	17765649	-	chr11:1-17780139C	c31477/f1p0/3134,c49682/f2p0/4045,c51279/f1p1/3812,c55263/f1p2/3968,c60573/f1p1/3874,c60955/f1p0/3583,c57032/f1p1/3937
chr11	Alternative 5' splice site	17768602	17768591	-	chr11:1-17780139C	c51279/f1p1/3812,c57032/f1p1/3937,c49682/f2p0/4045
chr11	Exon skipping	17772385	17770291	-	chr11:1-17780139C	c60955/f1p0/3583,c31477/f1p0/3134,c47701/f1p0/3829,c49682/f2p0/4045,c51279/f1p1/3812,c55263/f1p2/3968,c57032/f1p1/3937,c60573/f1p1/3874
chr11	Exon skipping	12078343	12078479	+	chr11:12067019-12105742W	c20584/f1p0/2858,c2123/f2p0/2172
chr11	Intron retention	12078729	12078823	+	chr11:12067019-12105742W	c20584/f1p0/2858,c2123/f2p0/2172,c23223/f1p0/2283,c46800/f1p1/3450
chr11	Intron retention	12079372	12080179	+	chr11:12067019-12105742W	c20584/f1p0/2858,c2123/f2p0/2172,c23223/f1p0/2283,c46800/f1p1/3450
chr11	Intron retention	12168120	12168035	-	chr11:12166490-12171915C	c24887/f1p0/3020,c40431/f1p2/2696,c46127/f1p0/3099,c49082/f6p3/2936
chr11	Alternative 5' splice site	12176265	12176264	-	chr11:12172631-12180410C	c33483/f1p2/3313,c38361/f7p15/3959,c47063/f6p13/3829,c38079/f9p13/3755,c48433/f4p9/3859,c50542/f2p5/3810
chr11	Intron retention	124336	123799	-	chr11:122175-130606C	c46632/f1p1/4116,c35292/f1p1/3193,c36583/f2p2/3444,c44703/f1p0/3246,c49787/f2p2/3787,c49836/f2p0/3628,c51404/f1p0/3827,c51597/f1p3/3762,c52224/f1p0/3701,c54599/f1p2/4009,c55495/f1p0/3704,c57222/f1p3/3651,c57260/f1p1/4099.1
chr11	Intron retention	126974	126779	-	chr11:122175-130606C	c46632/f1p1/4116,c49836/f2p0/3628,c55495/f1p0/3704,c35292/f1p1/3193,c36583/f2p2/3444,c44703/f1p0/3246,c51404/f1p0/3827,c52224/f1p0/3701,c57222/f1p3/3651
chr11	Intron retention	126974	126779	-	chr11:122175-130606C	c54599/f1p2/4009,c49787/f2p2/3787,c57260/f1p1/4099.1
chr11	Alternative 3' splice site	127170	127086	-	chr11:122175-130606C	c51597/f1p3/3762,c46632/f1p1/4116,c49836/f2p0/3628,c55495/f1p0/3704
chr11	Intron retention	127304	127086	-	chr11:122175-130606C	c49787/f2p2/3787,c57260/f1p1/4099.1,c35292/f1p1/3193,c36583/f2p2/3444,c44703/f1p0/3246,c51404/f1p0/3827,c52224/f1p0/3701,c57222/f1p3/3651
chr11	Intron retention	127304	127170	-	chr11:122175-130606C	c54599/f1p2/4009,c51597/f1p3/3762
chr11	Intron retention	127304	126779	-	chr11:122175-130606C	c54599/f1p2/4009,c35292/f1p1/3193,c36583/f2p2/3444,c44703/f1p0/3246,c51404/f1p0/3827,c52224/f1p0/3701,c57222/f1p3/3651
chr11	Intron retention	127304	127086	-	chr11:122175-130606C	c54599/f1p2/4009,c46632/f1p1/4116,c49836/f2p0/3628,c55495/f1p0/3704
chr11	Intron retention	128429	128194	-	chr11:122175-130606C	c57260/f1p1/4099.2,c35292/f1p1/3193,c49836/f2p0/3628,c52224/f1p0/3701,c54599/f1p2/4009,c55495/f1p0/3704,c57222/f1p3/3651
chr11	Alternative 3' splice site	128709	128706	-	chr11:122175-130606C	c35292/f1p1/3193,c49836/f2p0/3628,c52224/f1p0/3701,c54599/f1p2/4009,c55495/f1p0/3704,c57222/f1p3/3651,c36583/f2p2/3444,c44703/f1p0/3246,c46632/f1p1/4116,c49787/f2p2/3787,c51404/f1p0/3827,c51597/f1p3/3762
chr11	Intron retention	12829055	12827842	-	chr11:12827246-12831805C	c21073/f1p0/2768,c7447/f1p0/2003
chr11	Intron retention	12886597	12886502	-	chr11:12884119-12890860C	c16248/f2p0/2783,c29015/f1p0/2963,c36084/f1p1/3214,c38127/f3p1/3688,c51346/f3p1/3706,c57113/f1p1/3449,c7996/f1p0/2027,c45433/f1p0/3566.1
chr11	Intron retention	12989528	12989620	+	chr11:12986723-12991241W	c42246/f1p0/1524,c12824/f2p0/2038,c2043/f2p1/2079
chr11	Intron retention	133764	133940	+	chr11:131694-134903W	c16187/f1p0/1825,c13218/f16p9/1788,c16406/f1p0/1909,c19702/f1p3/1581,c19731/f1p0/1742.1,c230/f24p7/1738,c32/f18p11/1818,c3259/f1p0/1568,c52664/f1p5/3752.2,c6136/f1p0/1819,c631/f5p8/1938
chr11	Intron retention	13209935	13209840	-	chr11:13208931-13242070C	c54189/f1p0/3533.2,c27953/f1p0/3307,c3888/f1p1/2122,c46446/f1p0/2688
chr11	Alternative 3' splice site	13211582	13211581	-	chr11:13208931-13242070C	c54189/f1p0/3533.2,c27953/f1p0/3307
chr11	Exon skipping	13294976	13295171	+	chr11:13267813-13298493W	c32080/f2p2/2852,c28904/f1p2/3284,c30657/f1p0/3252,c40877/f1p0/2913,c54692/f1p0/4395.3,c58284/f2p4/3239,c58503/f1p3/3010
chr11	Intron retention	13299774	13300284	+	chr11:13298988-13302391W	c57334/f1p0/3936.1,c33119/f1p0/3175.1
chr11	Intron retention	13306967	13306821	-	chr11:13305048-13309253C	c21896/f1p0/1596,c48034/f1p0/1569,c3303/f1p0/1584,c9495/f1p0/1623
chr11	Intron retention	13307132	13307048	-	chr11:13305048-13309253C	c31228/f1p0/2784,c21896/f1p0/1596,c48034/f1p0/1569
chr11	Intron retention	13307132	13306821	-	chr11:13305048-13309253C	c31228/f1p0/2784,c3303/f1p0/1584,c9495/f1p0/1623
chr11	Intron retention	13307784	13307659	-	chr11:13305048-13309253C	c31228/f1p0/2784,c21896/f1p0/1596,c3303/f1p0/1584,c48034/f1p0/1569,c9495/f1p0/1623
chr11	Intron retention	13308305	13308198	-	chr11:13305048-13309253C	c31228/f1p0/2784,c21896/f1p0/1596,c3303/f1p0/1584,c48034/f1p0/1569,c9495/f1p0/1623
chr11	Alternative 3' splice site	13308550	13308539	-	chr11:13305048-13309253C	c21896/f1p0/1596,c31228/f1p0/2784,c3303/f1p0/1584,c48034/f1p0/1569
chr11	Alternative 3' splice site	13308624	13308550	-	chr11:13305048-13309253C	c9495/f1p0/1623,c21896/f1p0/1596,c31228/f1p0/2784
chr11	Alternative 3' splice site	13308624	13308539	-	chr11:13305048-13309253C	c9495/f1p0/1623,c3303/f1p0/1584,c48034/f1p0/1569
chr11	Intron retention	13320093	13320877	+	chr11:13315394-13340016W	c22643/f1p0/2700,c10836/f1p0/1800
chr11	Intron retention	13427750	13427086	-	chr11:13424147-13427892C	c60015/f1p0/3682,c43397/f1p0/2951
chr11	Intron retention	137997	138119	+	chr11:135044-178082W	c3777/f1p0/1721.1,c6220/f1p0/1655
chr11	Intron retention	137997	138119	+	chr11:135044-178082W	c52664/f1p5/3752.1,c25159/f1p1/1666,c800/f6p1/1683
chr11	Intron retention	139696	139861	+	chr11:135044-178082W	c5982/f1p0/1693,c6220/f1p0/1655,c1943/f3p0/1565,c24679/f1p0/1538,c25159/f1p1/1666,c3777/f1p0/1721.1,c52664/f1p5/3752.1,c800/f6p1/1683
chr11	Intron retention	139696	140107	+	chr11:135044-178082W	c15821/f1p0/2061,c24679/f1p0/1538,c3777/f1p0/1721.1,c800/f6p1/1683
chr11	Intron retention	13571019	13571355	+	chr11:13570862-13574508W	c19127/f1p0/2869,c14437/f2p0/2416,c36070/f1p1/2744
chr11	Intron retention	13571019	13571167	+	chr11:13570862-13574508W	c19127/f1p0/2869,c35254/f1p0/2603
chr11	Intron retention	13571019	13571167	+	chr11:13570862-13574508W	c30914/f1p0/3539.1,c42478/f1p0/2823
chr11	Intron retention	13571019	13571574	+	chr11:13570862-13574508W	c30914/f1p0/3539.1,c17530/f1p1/2753,c26915/f3p1/2534
chr11	Intron retention	13571019	13571574	+	chr11:13570862-13574508W	c30914/f1p0/3539.1,c40227/f1p0/2608
chr11	Intron retention	13571258	13571355	+	chr11:13570862-13574508W	c35254/f1p0/2603,c40227/f1p0/2608,c14437/f2p0/2416,c17530/f1p1/2753,c26915/f3p1/2534,c36070/f1p1/2744
chr11	Intron retention	13571258	13571574	+	chr11:13570862-13574508W	c24001/f1p1/2684,c42478/f1p0/2823,c14437/f2p0/2416,c17530/f1p1/2753,c26915/f3p1/2534
chr11	Intron retention	13571452	13571574	+	chr11:13570862-13574508W	c24001/f1p1/2684,c42478/f1p0/2823,c35254/f1p0/2603,c40227/f1p0/2608
chr11	Intron retention	13571729	13571946	+	chr11:13570862-13574508W	c36070/f1p1/2744,c14437/f2p0/2416,c19127/f1p0/2869,c26915/f3p1/2534,c35254/f1p0/2603,c40227/f1p0/2608
chr11	Intron retention	13572622	13572711	+	chr11:13570862-13574508W	c42478/f1p0/2823,c14437/f2p0/2416,c19127/f1p0/2869,c26915/f3p1/2534,c35254/f1p0/2603,c40227/f1p0/2608
chr11	Intron retention	13572672	13572685	+	chr11:13570862-13574508W	c42478/f1p0/2823,c17530/f1p1/2753
chr11	Intron retention	13573157	13573258	+	chr11:13570862-13574508W	c17530/f1p1/2753,c19127/f1p0/2869,c26915/f3p1/2534,c35254/f1p0/2603,c36070/f1p1/2744,c40227/f1p0/2608,c42478/f1p0/2823
chr11	Intron retention	13816083	13816169	+	chr11:13813164-13820949W	c62229/f1p0/4038,c54331/f1p1/3766,c55028/f1p1/3635
chr11	Alternative 3' splice site	13817516	13817532	+	chr11:13813164-13820949W	c62229/f1p0/4038,c31152/f1p1/3005,c54331/f1p1/3766,c55028/f1p1/3635
chr11	Alternative 5' splice site	14044884	14044907	+	chr11:14039888-14050217W	c21217/f1p0/3228,c21053/f4p0/3151,c32881/f1p0/3234,c41681/f1p0/3688,c43677/f1p0/3303.1,c48269/f1p0/3003
chr11	Alternative 5' splice site	14044884	14044905	+	chr11:14039888-14050217W	c21217/f1p0/3228,c29468/f1p0/2872
chr11	Alternative 5' splice site	14044905	14044907	+	chr11:14039888-14050217W	c29468/f1p0/2872,c21053/f4p0/3151,c32881/f1p0/3234,c41681/f1p0/3688,c43677/f1p0/3303.1,c48269/f1p0/3003
chr11	Intron retention	14047788	14047859	+	chr11:14039888-14050217W	c20345/f1p0/2592.1,c21053/f4p0/3151,c21217/f1p0/3228,c29468/f1p0/2872,c3204/f1p0/1930,c32881/f1p0/3234,c41681/f1p0/3688,c43677/f1p0/3303.1,c48269/f1p0/3003,c50250/f1p0/3872,c50799/f1p0/3915.2,c52432/f1p0/4139.1
chr11	Alternative 5' splice site	14388198	14388177	-	chr11:14386218-14400078C	c12758/f1p0/1838,c12714/f1p0/1928,c1446/f4p2/1841,c21913/f1p0/2265,c43867/f1p0/2875
chr11	Intron retention	14763007	14762839	-	chr11:14761649-14765860C	c39175/f1p3/4027,c43391/f2p3/3763,c61895/f1p4/3682
chr11	Alternative 3' splice site	14852151	14852046	-	chr11:14790054-14859344C	c18532/f1p0/2782,c59246/f1p0/3778,c17955/f1p0/2961,c56132/f2p2/3761
chr11	Alternative 3' splice site	14853482	14853014	-	chr11:14790054-14859344C	c17955/f1p0/2961,c18532/f1p0/2782
chr11	Intron retention	14828478	14828751	+	chr11:14828208-14909600W	c18731/f1p0/3011,c43104/f1p0/3112,c40941/f1p2/2824
chr11	Alternative 3' splice site	14852151	14852046	-	chr11:14849852-14859344C	c34492/f1p1/2700,c22448/f1p0/6139.1,c26567/f2p0/2637,c45578/f3p5/3821,c47217/f1p3/3817,c48093/f1p2/2774,c55446/f1p2/3687
chr11	Intron retention	14852854	14852046	-	chr11:14849852-14859344C	c46251/f1p1/3838,c45578/f3p5/3821,c47217/f1p3/3817
chr11	Alternative 3' splice site	15136462	15136488	+	chr11:15135595-15141866W	c29817/f1p0/3365.1,c33720/f1p0/5761.2,c46898/f1p1/2930,c50193/f1p0/3915.2,c53540/f1p1/3735,c55167/f1p0/3684.1,c56160/f1p1/3962.1,c39833/f1p1/2878
chr11	Intron retention	15138114	15138680	+	chr11:15135595-15141866W	c50193/f1p0/3915.1,c53540/f1p1/3735,c56160/f1p1/3962.1,c29817/f1p0/3365.1,c33720/f1p0/5761.2,c39833/f1p1/2878,c46898/f1p1/2930,c55167/f1p0/3684.1
chr11	Intron retention	15140097	15140543	+	chr11:15135595-15141866W	c53540/f1p1/3735,c50193/f1p0/3915.1
chr11	Exon skipping	15140177	15140224	+	chr11:15135595-15141866W	c10408/f1p0/2372,c29817/f1p0/3365.1,c33720/f1p0/5761.1,c33720/f1p0/5761.2,c39833/f1p1/2878,c50193/f1p0/3915.1,c46898/f1p1/2930
chr11	Intron retention	15140899	15141006	+	chr11:15135595-15141866W	c10408/f1p0/2372,c50193/f1p0/3915.1
chr11	Intron retention	15198642	15199579	+	chr11:15191141-15201289W	c41223/f1p0/3379,c18709/f1p0/2299
chr11	Intron retention	15276062	15275844	-	chr11:15272862-15276695C	c38651/f1p0/3109,c9488/f1p0/1478,c21706/f1p2/2795
chr11	Intron retention	15273923	15274138	+	chr11:15272951-15279384W	c31958/f1p0/3097,c5594/f1p1/1796
chr11	Intron retention	15274271	15274460	+	chr11:15272951-15279384W	c5594/f1p1/1796,c24312/f1p0/1948,c9218/f1p0/1855
chr11	Alternative 3' splice site	15274390	15274460	+	chr11:15272951-15279384W	c3148/f1p0/1883,c24312/f1p0/1948,c9218/f1p0/1855
chr11	Intron retention	15274681	15275786	+	chr11:15272951-15279384W	c31958/f1p0/3097,c24312/f1p0/1948
chr11	Intron retention	15274681	15275760	+	chr11:15272951-15279384W	c31958/f1p0/3097,c3148/f1p0/1883,c5594/f1p1/1796,c9218/f1p0/1855
chr11	Alternative 3' splice site	15275760	15275786	+	chr11:15272951-15279384W	c3148/f1p0/1883,c5594/f1p1/1796,c9218/f1p0/1855,c24312/f1p0/1948
chr11	Alternative 3' splice site	16144610	16144592	-	chr11:16141912-16147185C	c31441/f1p0/3984.1,c35678/f1p3/3111,c40715/f1p1/2801,c52008/f1p0/3967,c57033/f1p1/3835,c15231/f1p1/2750,c33430/f1p0/3088,c60175/f1p3/3803,c61225/f1p0/4895
chr11	Intron retention	1678174	1678257	+	chr11:1676980-1681904W	c40188/f1p0/2747,c14386/f8p3/3170,c33996/f1p0/3042,c35376/f1p3/2936,c35511/f1p2/3229,c35587/f1p0/3137,c39277/f1p1/3258,c39519/f1p0/3176,c44034/f1p0/3219.2
chr11	Intron retention	1679877	1679964	+	chr11:1676980-1681904W	c39277/f1p1/3258,c14386/f8p3/3170
chr11	Intron retention	17075883	17075973	+	chr11:17073746-17078194W	c22811/f1p0/2186,c9483/f1p1/1824,c2672/f1p1/1777
chr11	Intron retention	17076515	17077092	+	chr11:17073746-17078194W	c22811/f1p0/2186,c2672/f1p1/1777
chr11	Intron retention	17076515	17077092	+	chr11:17073746-17078194W	c22811/f1p0/2186,c9483/f1p1/1824
chr11	Alternative 5' splice site	17076860	17076869	+	chr11:17073746-17078194W	c9483/f1p1/1824,c2672/f1p1/1777
chr11	Intron retention	17097412	17097525	+	chr11:17094366-17098360W	c46506/f1p0/2707,c24513/f1p0/2748.1,c35200/f1p0/2597
chr11	Intron retention	17097412	17097702	+	chr11:17094366-17098360W	c29815/f1p0/2645,c24513/f1p0/2748.1,c35200/f1p0/2597
chr11	Intron retention	17097621	17097702	+	chr11:17094366-17098360W	c29815/f1p0/2645,c46506/f1p0/2707
chr11	Mutually exclusive exon	17495788	17494191	-	chr11:17485971-17497968C	c38943/f1p0/2826,c27981/f1p0/2895
chr11	Intron retention	1759450	1759783	+	chr11:1758308-1760826W	c21550/f1p0/1995,c15720/f1p0/1614
chr11	Intron retention	17754236	17754352	+	chr11:17754049-17759146W	c40300/f1p1/3651,c45626/f1p1/3545
chr11	Intron retention	17758350	17758409	+	chr11:17754049-17759146W	c40885/f3p1/3723,c45626/f1p1/3545
chr11	Intron retention	17983561	17983444	-	chr11:17981889-17987903C	c59666/f1p0/3721,c15127/f3p12/3243,c62503/f1p0/3724
chr11	Intron retention	17985276	17984736	-	chr11:17981889-17987903C	c62503/f1p0/3724,c15127/f3p12/3243,c59666/f1p0/3721
chr11	Intron retention	17983561	17983444	-	chr11:17981935-17987933C	c62436/f1p0/3795,c13285/f172p42/3195,c23405/f3p17/2733,c23473/f1p1/2757.1,c24770/f1p0/2369,c24947/f1p3/3076,c25731/f3p6/1826,c30752/f1p4/3076,c33666/f1p0/1557,c34468/f1p3/3096,c38447/f3p13/2918,c42680/f11p17/3646,c48364/f3p10/3039,c50588/f1p2/3106,c5095/f1p7/2077,c51866/f1p1/3427
chr11	Alternative 5' splice site	17984677	17984619	-	chr11:17981935-17987933C	c30752/f1p4/3076,c13285/f172p42/3195,c23405/f3p17/2733,c24770/f1p0/2369,c25731/f3p6/1826,c34468/f1p3/3096,c38447/f3p13/2918,c42680/f11p17/3646,c48364/f3p10/3039,c50588/f1p2/3106,c5095/f1p7/2077,c51866/f1p1/3427
chr11	Intron retention	17985276	17984736	-	chr11:17981935-17987933C	c24947/f1p3/3076,c62436/f1p0/3795,c13285/f172p42/3195,c23405/f3p17/2733,c24770/f1p0/2369,c38447/f3p13/2918,c42680/f11p17/3646,c48364/f3p10/3039,c50588/f1p2/3106,c51866/f1p1/3427
chr11	Alternative 5' splice site	17985322	17985276	-	chr11:17981935-17987933C	c34468/f1p3/3096,c13285/f172p42/3195,c23405/f3p17/2733,c24770/f1p0/2369,c30752/f1p4/3076,c38447/f3p13/2918,c42680/f11p17/3646,c48364/f3p10/3039,c50588/f1p2/3106,c51866/f1p1/3427
chr11	Intron retention	17985322	17984736	-	chr11:17981935-17987933C	c24947/f1p3/3076,c62436/f1p0/3795,c34468/f1p3/3096
chr11	Intron retention	17987616	17987160	-	chr11:17981935-17987933C	c42680/f11p17/3646,c13285/f172p42/3195
chr11	Intron retention	17985276	17984736	-	chr11:17982002-17987903C	c25072/f1p5/3209,c12313/f1p1/2318,c30270/f1p0/3095.1,c44248/f1p15/3116,c45746/f1p0/3102.1,c47657/f1p4/3500
chr11	Intron retention	18229473	18229362	-	chr11:18228641-18232654C	c43695/f1p0/3270,c23419/f1p2/3287
chr11	Exon skipping	18229665	18229473	-	chr11:18228641-18232654C	c27222/f1p0/2464,c24965/f1p0/2853
chr11	Intron retention	18230325	18229665	-	chr11:18228641-18232654C	c23419/f1p2/3287,c24965/f1p0/2853
chr11	Alternative 5' splice site	18230325	18229473	-	chr11:18228641-18232654C	c27222/f1p0/2464,c23419/f1p2/3287
chr11	Intron retention	18230325	18229362	-	chr11:18228641-18232654C	c43695/f1p0/3270,c24965/f1p0/2853
chr11	Intron retention	18230325	18229362	-	chr11:18228641-18232654C	c43695/f1p0/3270,c27222/f1p0/2464
chr11	Intron retention	18230615	18230420	-	chr11:18228641-18232654C	c43695/f1p0/3270,c30243/f1p0/3224
chr11	Alternative 5' splice site	18476482	18476483	+	chr11:18460465-18477113W	c61848/f1p2/3611,c36090/f1p8/3252
chr11	Exon skipping	19969120	19969178	+	chr11:19968085-19974289W	c18033/f1p0/1594,c25532/f1p0/3376.1,c9110/f1p0/3838.1
chr11	Intron retention	2114727	2115210	+	chr11:2107536-2189996W	c4498/f1p0/2199.1,c20230/f1p0/1975.1,c20701/f1p0/1780,c2178/f2p0/1839
chr11	Intron retention	2186193	2186762	+	chr11:2107536-2189996W	c22856/f1p0/3373.1,c51710/f1p2/3630.1,c7466/f1p0/1989.1
chr11	Intron retention	2187797	2188064	+	chr11:2107536-2189996W	c47439/f1p1/2690,c22856/f1p0/3373.1
chr11	Alternative 5' splice site	2188742	2188860	+	chr11:2107536-2189996W	c47439/f1p1/2690,c22856/f1p0/3373.1
chr11	Alternative 5' splice site	22881385	22881420	+	chr11:22878617-22885752W	c60981/f1p2/3388.1,c31821/f1p2/3118.2
chr11	Alternative 5' splice site	22881409	22881410	+	chr11:22878617-22885752W	c18244/f1p2/2721,c12446/f1p1/2211,c23310/f1p0/2703,c27067/f1p0/2885.2,c34129/f1p2/2407,c35961/f1p0/2453,c6246/f1p0/2121
chr11	Alternative 3' splice site	22882685	22882782	+	chr11:22878617-22885752W	c12446/f1p1/2211,c18244/f1p2/2721,c23310/f1p0/2703,c27067/f1p0/2885.1,c33811/f1p2/2726,c34129/f1p2/2407,c35961/f1p0/2453,c60981/f1p2/3388.1,c6246/f1p0/2121
chr11	Intron retention	22883439	22883648	+	chr11:22878617-22885752W	c18244/f1p2/2721,c27067/f1p0/2885.1,c31821/f1p2/3118.1,c33811/f1p2/2726,c12446/f1p1/2211,c23310/f1p0/2703,c34129/f1p2/2407,c35961/f1p0/2453,c60981/f1p2/3388.1,c6246/f1p0/2121
chr11	Alternative 5' splice site	23862706	23862784	+	chr11:23847598-23866047W	c59497/f1p2/3933,c61312/f2p1/3980
chr11	Alternative 3' splice site	23862873	23862890	+	chr11:23847598-23866047W	c37911/f9p7/4049,c38196/f8p4/4057,c55397/f1p0/3872,c56451/f1p1/3871,c56928/f1p1/4101,c57406/f2p7/4154,c57942/f1p0/4044,c61312/f2p1/3980
chr11	Alternative 3' splice site	23863131	23863153	+	chr11:23847598-23866047W	c55397/f1p0/3872,c37911/f9p7/4049,c38196/f8p4/4057,c50641/f1p0/3744,c56451/f1p1/3871,c56928/f1p1/4101,c57406/f2p7/4154,c57942/f1p0/4044,c59497/f1p2/3933,c61312/f2p1/3980
chr11	Alternative 5' splice site	23988471	23988529	+	chr11:23988160-24001598W	c6542/f1p2/2057,c20303/f1p1/2104
chr11	Alternative 5' splice site	24075499	24073863	-	chr11:24071190-24076921C	c12454/f1p0/1636,c46719/f1p0/3230
chr11	Intron retention	24358433	24359016	+	chr11:24357111-24364489W	c47444/f1p0/3105,c19756/f2p1/2761,c39124/f1p0/2755,c45448/f1p0/3155,c48251/f1p1/3868.1,c62114/f1p1/3929
chr11	Intron retention	24358433	24359737	+	chr11:24357111-24364489W	c57803/f1p1/3941,c19756/f2p1/2761,c39124/f1p0/2755,c45448/f1p0/3155,c48251/f1p1/3868.1,c62114/f1p1/3929
chr11	Intron retention	24359095	24359737	+	chr11:24357111-24364489W	c57803/f1p1/3941,c47444/f1p0/3105
chr11	Intron retention	24361370	24362193	+	chr11:24357111-24364489W	c62114/f1p1/3929,c45448/f1p0/3155
chr11	Alternative 5' splice site	24362275	24362357	+	chr11:24357111-24364489W	c10524/f1p0/2146,c19756/f2p1/2761,c27297/f1p1/2633,c47444/f1p0/3105,c57803/f1p1/3941,c39124/f1p0/2755
chr11	Intron retention	24621292	24621415	+	chr11:24587817-24622601W	c1911/f4p1/2039,c10310/f1p0/1927
chr11	Intron retention	24593333	24592917	-	chr11:24591588-24595405C	c11865/f1p1/2019,c506/f12p7/1613,c9818/f1p7/1769
chr11	Intron retention	24658937	24659079	+	chr11:24658022-24662500W	c13420/f38p7/2817,c18163/f3p7/2698,c19965/f1p0/3094,c20463/f1p0/2811,c22004/f1p7/2694,c23185/f1p0/4013.1,c23915/f1p7/2796,c35858/f1p0/2686,c47265/f1p1/3323,c51052/f1p0/3702.2,c16372/f1p1/2668
chr11	Intron retention	24660018	24660158	+	chr11:24658022-24662500W	c47265/f1p1/3323,c19965/f1p0/3094
chr11	Intron retention	24660018	24660742	+	chr11:24658022-24662500W	c47265/f1p1/3323,c13420/f38p7/2817,c16372/f1p1/2668,c18163/f3p7/2698,c20463/f1p0/2811,c22004/f1p7/2694,c23915/f1p7/2796,c33131/f1p0/3304.1
chr11	Intron retention	24660018	24660742	+	chr11:24658022-24662500W	c47265/f1p1/3323,c35858/f1p0/2686
chr11	Intron retention	24660190	24660299	+	chr11:24658022-24662500W	c13420/f38p7/2817,c16372/f1p1/2668,c18163/f3p7/2698,c20463/f1p0/2811,c22004/f1p7/2694,c23185/f1p0/4013.1,c23185/f1p0/4013.2,c23915/f1p7/2796,c33131/f1p0/3304.1,c20411/f1p0/1761
chr11	Intron retention	24660190	24660742	+	chr11:24658022-24662500W	c19965/f1p0/3094,c51052/f1p0/3702.1,c20411/f1p0/1761
chr11	Alternative 5' splice site	24660340	24660370	+	chr11:24658022-24662500W	c35858/f1p0/2686,c13420/f38p7/2817,c16372/f1p1/2668,c18163/f3p7/2698,c20463/f1p0/2811,c22004/f1p7/2694,c23185/f1p0/4013.1,c23185/f1p0/4013.2,c23915/f1p7/2796,c33131/f1p0/3304.1
chr11	Intron retention	24660340	24660742	+	chr11:24658022-24662500W	c19965/f1p0/3094,c51052/f1p0/3702.1,c35858/f1p0/2686
chr11	Intron retention	24660370	24660742	+	chr11:24658022-24662500W	c19965/f1p0/3094,c51052/f1p0/3702.1,c13420/f38p7/2817,c16372/f1p1/2668,c18163/f3p7/2698,c20463/f1p0/2811,c22004/f1p7/2694,c23185/f1p0/4013.2,c23915/f1p7/2796,c33131/f1p0/3304.1
chr11	Intron retention	24661494	24661570	+	chr11:24658022-24662500W	c20463/f1p0/2811,c47265/f1p1/3323,c13420/f38p7/2817,c16372/f1p1/2668,c18163/f3p7/2698,c19965/f1p0/3094,c22004/f1p7/2694,c23915/f1p7/2796,c33131/f1p0/3304.1,c35858/f1p0/2686,c51052/f1p0/3702.1
chr11	Intron retention	24661494	24661571	+	chr11:24658022-24662500W	c20463/f1p0/2811,c47265/f1p1/3323,c20411/f1p0/1761
chr11	Alternative 3' splice site	24661570	24661571	+	chr11:24658022-24662500W	c13420/f38p7/2817,c16372/f1p1/2668,c18163/f3p7/2698,c19965/f1p0/3094,c22004/f1p7/2694,c23915/f1p7/2796,c33131/f1p0/3304.1,c35858/f1p0/2686,c51052/f1p0/3702.1,c20411/f1p0/1761
chr11	Exon skipping	2557124	2557174	+	chr11:2556886-2564733W	c12198/f1p0/2177,c29573/f1p0/2567,c5149/f1p0/1619,c16531/f1p0/1633
chr11	Alternative 5' splice site	2561359	2561360	+	chr11:2556886-2564733W	c16531/f1p0/1633,c29573/f1p0/2567,c5149/f1p0/1619,c12198/f1p0/2177
chr11	Alternative 3' splice site	2621712	2621756	+	chr11:2621335-2625219W	c5298/f1p0/1729,c5461/f1p0/1721
chr11	Exon skipping	2622403	2622546	+	chr11:2621335-2625219W	c5298/f1p0/1729,c5461/f1p0/1721
chr11	Intron retention	26345060	26344748	-	chr11:26343547-26350719C	c31047/f1p0/3009,c26376/f4p1/2692
chr11	Alternative 3' splice site	26348026	26348021	-	chr11:26343547-26350719C	c31047/f1p0/3009,c19328/f1p0/2921.1,c26376/f4p1/2692
chr11	Intron retention	26346198	26346114	-	chr11:26343547-26350790C	c42791/f1p0/2529,c62875/f1p0/3905,c43604/f1p0/2654
chr11	Intron retention	26349125	26348026	-	chr11:26343547-26350790C	c62875/f1p0/3905,c42791/f1p0/2529,c43604/f1p0/2654
chr11	Intron retention	278039	277267	-	chr11:273330-278144C	c15915/f1p0/3038,c16527/f1p0/2256
chr11	Alternative 3' splice site	2846611	2846569	-	chr11:2845370-2852761C	c22159/f1p0/2841,c28435/f1p0/2869,c14258/f5p1/2888
chr11	Intron retention	2848974	2848859	-	chr11:2845370-2852761C	c44047/f1p0/3425.1,c14258/f5p1/2888,c28435/f1p0/2869
chr11	Alternative 5' splice site	2848997	2848974	-	chr11:2845370-2852761C	c22159/f1p0/2841,c14258/f5p1/2888,c28435/f1p0/2869
chr11	Intron retention	2848997	2848859	-	chr11:2845370-2852761C	c44047/f1p0/3425.1,c22159/f1p0/2841
chr11	Alternative 5' splice site	2849250	2849215	-	chr11:2845370-2852761C	c44047/f1p0/3425.1,c14258/f5p1/2888,c22159/f1p0/2841,c28435/f1p0/2869
chr11	Intron retention	28904290	28904455	+	chr11:28840712-28906117W	c45467/f1p1/3125,c19335/f1p0/3378,c45355/f1p1/3470
chr11	Alternative 3' splice site	29089227	29089232	+	chr11:29087150-29093247W	c17819/f1p0/1963,c8267/f1p0/1739
chr11	Intron retention	29090854	29091134	+	chr11:29087150-29093247W	c40517/f1p0/3373.1,c17819/f1p0/1963,c5740/f1p0/1908,c8267/f1p0/1739
chr11	Alternative 3' splice site	29091832	29091853	+	chr11:29087150-29093247W	c40517/f1p0/3373.1,c5740/f1p0/1908,c8267/f1p0/1739,c17819/f1p0/1963
chr11	Intron retention	3030477	3030578	+	chr11:3029596-3032384W	c18096/f1p0/1677,c3347/f1p0/2114,c8452/f1p0/1608
chr11	Intron retention	31692596	31692213	-	chr11:31690747-31695520C	c32663/f1p0/2932,c14806/f2p0/2806,c18214/f1p1/2626,c18546/f3p1/2730,c29413/f2p0/2802,c35314/f3p2/2759,c45997/f1p2/2833
chr11	Intron retention	31692950	31692711	-	chr11:31690747-31695520C	c23745/f1p1/2685,c46861/f1p0/2996,c14806/f2p0/2806,c18214/f1p1/2626,c18546/f3p1/2730,c29413/f2p0/2802,c35314/f3p2/2759,c45997/f1p2/2833
chr11	Intron retention	31701850	31701237	-	chr11:31697818-31705109C	c28032/f1p0/3073,c56504/f1p0/3344,c21125/f1p0/2694
chr11	Intron retention	31702328	31701988	-	chr11:31697818-31705109C	c17763/f1p1/3006,c21125/f1p0/2694
chr11	Intron retention	33873345	33874646	+	chr11:33870959-33875878W	c14774/f1p0/3111,c13759/f7p7/2661,c17407/f1p5/2254,c17895/f1p0/2714.1,c24667/f11p6/2726,c29241/f1p0/2770,c46993/f1p6/2833
chr11	Intron retention	33873345	33874646	+	chr11:33870959-33875878W	c14774/f1p0/3111,c48085/f1p0/2151
chr11	Intron retention	33873345	33873720	+	chr11:33870959-33875878W	c14774/f1p0/3111,c24051/f1p1/3134,c26828/f2p2/2792
chr11	Alternative 5' splice site	33874150	33874174	+	chr11:33870959-33875878W	c48085/f1p0/2151,c13759/f7p7/2661,c17407/f1p5/2254,c17895/f1p0/2714.1,c24667/f11p6/2726,c29241/f1p0/2770,c46993/f1p6/2833
chr11	Intron retention	33874150	33874646	+	chr11:33870959-33875878W	c24051/f1p1/3134,c26828/f2p2/2792,c48085/f1p0/2151
chr11	Intron retention	33874174	33874646	+	chr11:33870959-33875878W	c24051/f1p1/3134,c26828/f2p2/2792,c13759/f7p7/2661,c17407/f1p5/2254,c17895/f1p0/2714.1,c24667/f11p6/2726,c29241/f1p0/2770,c46993/f1p6/2833
chr11	Alternative 3' splice site	3482062	3481944	-	chr11:3468188-3488319C	c24347/f1p0/2874,c27712/f1p3/2868,c35351/f2p5/2829,c58683/f3p12/2810,c64111/f1p2/2661
chr11	Intron retention	35366167	35365991	-	chr11:35362426-35369254C	c9463/f1p0/1682,c835/f7p0/1618
chr11	Intron retention	35366414	35365991	-	chr11:35362426-35369254C	c10391/f1p0/1920,c835/f7p0/1618
chr11	Intron retention	35366414	35366242	-	chr11:35362426-35369254C	c10391/f1p0/1920,c9463/f1p0/1682
chr11	Intron retention	35366679	35366586	-	chr11:35362426-35369254C	c19589/f1p1/2031,c10391/f1p0/1920
chr11	Intron retention	35366679	35365991	-	chr11:35362426-35369254C	c19589/f1p1/2031,c835/f7p0/1618
chr11	Intron retention	35366679	35366242	-	chr11:35362426-35369254C	c19589/f1p1/2031,c9463/f1p0/1682
chr11	Alternative 3' splice site	35459020	35458999	-	chr11:35455002-35461640C	c12217/f1p0/1647,c1621/f3p0/1635
chr11	Alternative 3' splice site	35742362	35742370	+	chr11:35673085-35769874W	c23110/f1p1/2772,c41567/f1p0/3161,c43084/f1p0/2873
chr11	Intron retention	35743052	35743345	+	chr11:35673085-35769874W	c41567/f1p0/3161,c12672/f1p1/2249
chr11	Intron retention	35743052	35743353	+	chr11:35673085-35769874W	c41567/f1p0/3161,c21833/f2p2/3071,c23110/f1p1/2772,c31680/f1p0/2742,c43084/f1p0/2873
chr11	Alternative 3' splice site	35743345	35743353	+	chr11:35673085-35769874W	c12672/f1p1/2249,c21833/f2p2/3071,c23110/f1p1/2772,c31680/f1p0/2742,c43084/f1p0/2873
chr11	Alternative 3' splice site	35744452	35744477	+	chr11:35673085-35769874W	c23110/f1p1/2772,c12672/f1p1/2249,c21833/f2p2/3071,c31680/f1p0/2742,c41567/f1p0/3161,c43084/f1p0/2873
chr11	Mutually exclusive exon	35745825	35767863	+	chr11:35673085-35769874W	c23110/f1p1/2772,c41567/f1p0/3161,c43084/f1p0/2873,c31680/f1p0/2742
chr11	Alternative 3' splice site	35764261	35764269	+	chr11:35673085-35769874W	c46695/f1p0/3689.1,c29446/f1p0/2765
chr11	Alternative 3' splice site	35765235	35765243	+	chr11:35673085-35769874W	c29446/f1p0/2765,c46695/f1p0/3689.1
chr11	Alternative 3' splice site	35849315	35849323	+	chr11:35848340-35859380W	c59610/f1p3/3809,c56211/f1p0/3654
chr11	Intron retention	35849546	35849609	+	chr11:35848340-35859380W	c46966/f2p1/3374,c49897/f2p3/3685,c59591/f1p0/3340,c23626/f2p0/3472
chr11	Intron retention	36154489	36154622	+	chr11:36148763-36156745W	c40413/f1p0/2846,c21410/f1p0/2595,c26179/f9p0/2751
chr11	Intron retention	36154953	36155203	+	chr11:36148763-36156745W	c40182/f1p0/2991,c21410/f1p0/2595,c26179/f9p0/2751
chr11	Intron retention	480912	480721	-	chr11:361623-502831C	c27974/f1p0/2848,c18432/f2p2/2704,c19129/f1p1/2578,c21245/f1p1/2785,c30431/f1p0/2682,c35239/f1p0/3068.1,c38188/f2p1/2704,c48142/f1p1/2627,c8252/f1p1/2124
chr11	Intron retention	481192	481071	-	chr11:361623-502831C	c33545/f1p0/2766,c18432/f2p2/2704,c19129/f1p1/2578,c21245/f1p1/2785,c30431/f1p0/2682,c35239/f1p0/3068.1,c38188/f2p1/2704,c48142/f1p1/2627,c8252/f1p1/2124
chr11	Alternative 3' splice site	483437	483434	-	chr11:361623-502831C	c18432/f2p2/2704,c30431/f1p0/2682,c33545/f1p0/2766,c38188/f2p1/2704,c19129/f1p1/2578,c21245/f1p1/2785,c27974/f1p0/2848,c35239/f1p0/3068.1,c48142/f1p1/2627
chr11	Exon skipping	36702450	36702507	+	chr11:36701241-36706209W	c14519/f4p1/2710,c17864/f1p0/2438,c23791/f3p1/2765,c33408/f1p1/3360,c33636/f1p0/3075,c34794/f1p0/2844,c35836/f1p0/2627,c42683/f1p1/3104,c45318/f1p1/3293,c42011/f1p0/2800,c45728/f1p0/3019
chr11	Intron retention	36704324	36704493	+	chr11:36701241-36706209W	c34794/f1p0/2844,c14519/f4p1/2710,c17864/f1p0/2438,c23791/f3p1/2765,c33636/f1p0/3075,c34999/f1p0/3157,c35836/f1p0/2627,c42011/f1p0/2800,c42683/f1p1/3104,c45318/f1p1/3293,c45728/f1p0/3019
chr11	Intron retention	36704734	36704845	+	chr11:36701241-36706209W	c33408/f1p1/3360,c14519/f4p1/2710,c17864/f1p0/2438,c23791/f3p1/2765,c33636/f1p0/3075,c34999/f1p0/3157,c35836/f1p0/2627,c42011/f1p0/2800,c42683/f1p1/3104,c45318/f1p1/3293,c45728/f1p0/3019
chr11	Intron retention	36705316	36705741	+	chr11:36701241-36706209W	c42683/f1p1/3104,c34999/f1p0/3157
chr11	Alternative 3' splice site	37510385	37510391	+	chr11:37509561-37512126W	c23807/f1p0/1846,c3209/f2p2/1768,c2504/f2p0/1591,c3250/f2p0/1594
chr11	Alternative 3' splice site	54565	54521	-	chr11:38395-60496C	c53802/f1p7/3672,c56610/f1p8/3789,c56570/f1p1/4044
chr11	Intron retention	38905212	38904896	-	chr11:38904213-38908752C	c30595/f1p1/2786,c60362/f1p1/3716,c22658/f1p2/2499,c45069/f1p0/3648.1
chr11	Intron retention	38905885	38905760	-	chr11:38904213-38908752C	c61861/f1p0/3845,c60362/f1p1/3716
chr11	Intron retention	38905885	38904616	-	chr11:38904213-38908752C	c22849/f1p1/3179,c22658/f1p2/2499
chr11	Intron retention	38906912	38905992	-	chr11:38904213-38908752C	c60362/f1p1/3716,c22658/f1p2/2499,c30595/f1p1/2786,c45069/f1p0/3648.1
chr11	Intron retention	38906912	38904896	-	chr11:38904213-38908752C	c61861/f1p0/3845,c22658/f1p2/2499,c45069/f1p0/3648.1
chr11	Intron retention	38906912	38905760	-	chr11:38904213-38908752C	c61861/f1p0/3845,c30595/f1p1/2786
chr11	Alternative 3' splice site	39080323	39080320	-	chr11:39068415-39165916C	c39233/f1p0/2971,c56139/f1p0/3068,c23512/f2p1/2926
chr11	Intron retention	39460419	39460514	+	chr11:39335247-39461822W	c3417/f1p0/1896,c16273/f1p0/1750
chr11	Alternative 5' splice site	39600900	39600896	-	chr11:39462655-39995726C	c13918/f16p3/2959,c24067/f1p0/2785,c32502/f1p0/2650,c34951/f1p0/2962,c42001/f1p0/2616
chr11	Exon skipping	39607352	39607230	-	chr11:39462655-39995726C	c24067/f1p0/2785,c13918/f16p3/2959,c26267/f4p3/2831,c42001/f1p0/2616
chr11	Alternative 3' splice site	39589221	39589244	+	chr11:39587655-39600071W	c3637/f1p0/1693,c20327/f1p0/1628
chr11	Alternative 3' splice site	39598994	39599020	+	chr11:39587655-39600071W	c20327/f1p0/1628,c3637/f1p0/1693
chr11	Intron retention	39605542	39605164	-	chr11:39599924-39609401C	c28951/f1p0/3106,c43694/f1p3/3601
chr11	Alternative 3' splice site	39607530	39607490	-	chr11:39599924-39609401C	c43694/f1p3/3601,c28951/f1p0/3106
chr11	Intron retention	39739489	39740117	+	chr11:39737527-39741278W	c36666/f1p0/2665,c22362/f1p0/2134
chr11	Exon skipping	40403764	40403666	-	chr11:40401014-40405794C	c3822/f1p0/1332,c29772/f1p0/1443
chr11	Intron retention	40730655	40730563	-	chr11:40729081-40732590C	c30514/f1p0/2715,c36294/f1p0/2629
chr11	Intron retention	4109422	4109316	-	chr11:4108538-4113473C	c32518/f1p0/2832,c20428/f2p0/1669,c8581/f1p0/1901,c9336/f1p0/1873,c971/f6p1/1852
chr11	Intron retention	4111222	4110296	-	chr11:4108538-4113473C	c32518/f1p0/2832,c8581/f1p0/1901
chr11	Intron retention	4111392	4110296	-	chr11:4108538-4113473C	c32518/f1p0/2832,c20428/f2p0/1669,c9336/f1p0/1873,c971/f6p1/1852
chr11	Intron retention	4128776	4128866	+	chr11:4127753-4138075W	c34273/f1p0/3448,c38212/f2p0/3355,c55974/f1p0/4242.1,c62467/f1p0/3872.2,c21369/f1p0/3388,c44517/f1p0/3284,c45958/f1p0/4264,c56081/f1p0/3759.1,c56821/f1p0/3945.2
chr11	Alternative 5' splice site	4130659	4130687	+	chr11:4127753-4138075W	c21369/f1p0/3388,c44517/f1p0/3284,c45958/f1p0/4264,c55974/f1p0/4242.1,c34273/f1p0/3448,c38212/f2p0/3355,c56081/f1p0/3759.1,c56821/f1p0/3945.2,c62467/f1p0/3872.2
chr11	Alternative 3' splice site	41355267	41355271	+	chr11:41352257-41356322W	c22344/f1p0/2156,c2554/f3p0/2204
chr11	Exon skipping	41572984	41572938	-	chr11:41567310-41574187C	c1670/f6p2/1817,c24130/f2p2/1782,c6314/f1p0/1648,c8280/f1p0/1664,c10568/f1p0/1794
chr11	Intron retention	41603106	41602790	-	chr11:41601717-41607670C	c47326/f1p0/3967,c39294/f2p0/3680
chr11	Intron retention	41603106	41602790	-	chr11:41601717-41607670C	c39104/f1p0/4060,c44681/f1p0/3827
chr11	Intron retention	41603330	41603159	-	chr11:41601717-41607670C	c44681/f1p0/3827,c39294/f2p0/3680
chr11	Intron retention	41603330	41602790	-	chr11:41601717-41607670C	c39104/f1p0/4060,c39294/f2p0/3680
chr11	Intron retention	41603330	41603159	-	chr11:41601717-41607670C	c39104/f1p0/4060,c47326/f1p0/3967
chr11	Alternative 3' splice site	41604097	41604011	-	chr11:41601717-41607670C	c15625/f3p0/3280,c29867/f1p1/3118,c32995/f2p0/3284,c33122/f1p1/3051,c39104/f1p0/4060,c39294/f2p0/3680,c47326/f1p0/3967,c48196/f1p0/3242,c59555/f1p0/3655,c39712/f1p0/3037,c56128/f1p0/3585
chr11	Intron retention	41604181	41604097	-	chr11:41601717-41607670C	c15758/f1p1/3183,c44681/f1p0/3827,c15625/f3p0/3280,c29867/f1p1/3118,c33122/f1p1/3051,c39104/f1p0/4060,c39294/f2p0/3680,c47326/f1p0/3967,c59555/f1p0/3655
chr11	Intron retention	41604181	41604011	-	chr11:41601717-41607670C	c15758/f1p1/3183,c44681/f1p0/3827,c39712/f1p0/3037
chr11	Intron retention	41604654	41604638	-	chr11:41601717-41607670C	c15625/f3p0/3280,c29867/f1p1/3118,c33122/f1p1/3051,c39104/f1p0/4060,c39294/f2p0/3680,c39712/f1p0/3037,c47326/f1p0/3967,c59555/f1p0/3655,c32995/f2p0/3284,c48196/f1p0/3242
chr11	Intron retention	41604654	41604097	-	chr11:41601717-41607670C	c15758/f1p1/3183,c44681/f1p0/3827,c32995/f2p0/3284,c48196/f1p0/3242
chr11	Intron retention	41605499	41605125	-	chr11:41601717-41607670C	c56128/f1p0/3585,c32995/f2p0/3284
chr11	Alternative 5' splice site	41605505	41605499	-	chr11:41601717-41607670C	c15625/f3p0/3280,c39294/f2p0/3680,c39712/f1p0/3037,c48196/f1p0/3242,c15758/f1p1/3183,c29867/f1p1/3118,c32995/f2p0/3284,c33122/f1p1/3051,c39104/f1p0/4060,c44681/f1p0/3827,c47326/f1p0/3967,c59555/f1p0/3655
chr11	Intron retention	41605505	41605125	-	chr11:41601717-41607670C	c56128/f1p0/3585,c48196/f1p0/3242
chr11	Alternative 5' splice site	41606339	41606285	-	chr11:41601717-41607670C	c15758/f1p1/3183,c29867/f1p1/3118,c33122/f1p1/3051,c39104/f1p0/4060,c39294/f2p0/3680,c39712/f1p0/3037,c44681/f1p0/3827,c47326/f1p0/3967,c48196/f1p0/3242,c59555/f1p0/3655,c15625/f3p0/3280,c32995/f2p0/3284,c56128/f1p0/3585
chr11	Intron retention	41678339	41678428	+	chr11:41674342-41679571W	c19954/f1p0/3207,c28039/f1p0/3064,c6859/f2p0/2029
chr11	Alternative 5' splice site	4263272	4263250	-	chr11:4261974-4266133C	c7364/f1p0/1747,c1544/f7p1/1789
chr11	Intron retention	4305322	4305241	-	chr11:4304608-4308811C	c27786/f1p0/3432,c47702/f1p0/3164
chr11	Alternative 3' splice site	4322500	4322495	-	chr11:4320653-4330012C	c35642/f1p2/3204,c38375/f3p2/3859,c48021/f1p0/2977,c51154/f1p5/4225,c56863/f1p2/4274
chr11	Alternative 5' splice site	475144	475093	-	chr11:458013-559749C	c30723/f1p0/3068,c43044/f1p0/3247
chr11	Intron retention	501778	501461	-	chr11:458013-559749C	c28580/f1p0/3095.1,c8264/f1p0/1870
chr11	Intron retention	505198	505117	-	chr11:458013-559749C	c64020/f1p1/1962,c10370/f1p0/1709
chr11	Alternative 5' splice site	505340	505336	-	chr11:458013-559749C	c64020/f1p1/1962,c10370/f1p0/1709
chr11	Exon skipping	4924113	4923952	-	chr11:4921564-4932930C	c26879/f4p3/3020,c41135/f1p1/2938,c42656/f1p0/3718.1,c47312/f1p0/2964,c21311/f2p3/3312,c23817/f1p1/2923,c28629/f1p1/3007
chr11	Alternative 5' splice site	4925782	4925735	-	chr11:4921564-4932930C	c26879/f4p3/3020,c27718/f1p2/3169
chr11	Alternative 3' splice site	4926073	4926070	-	chr11:4921564-4932930C	c21311/f2p3/3312,c26879/f4p3/3020,c28629/f1p1/3007,c41135/f1p1/2938,c47312/f1p0/2964
chr11	Alternative 3' splice site	4926867	4926864	-	chr11:4921564-4932930C	c47312/f1p0/2964,c21311/f2p3/3312,c26879/f4p3/3020,c28629/f1p1/3007,c41135/f1p1/2938
chr11	Mutually exclusive exon	4929221	4926483	-	chr11:4921564-4932930C	c27718/f1p2/3169,c21311/f2p3/3312,c26879/f4p3/3020,c28629/f1p1/3007
chr11	Alternative 3' splice site	4929224	4929221	-	chr11:4921564-4932930C	c23817/f1p1/2923,c27718/f1p2/3169
chr11	Mutually exclusive exon	4929224	4926483	-	chr11:4921564-4932930C	c23817/f1p1/2923,c21311/f2p3/3312,c26879/f4p3/3020,c28629/f1p1/3007
chr11	Intron retention	4930486	4930371	-	chr11:4921564-4932930C	c27718/f1p2/3169,c28629/f1p1/3007,c21311/f2p3/3312
chr11	Alternative 5' splice site	4930494	4930486	-	chr11:4921564-4932930C	c23817/f1p1/2923,c26879/f4p3/3020,c41135/f1p1/2938,c47312/f1p0/2964,c21311/f2p3/3312
chr11	Intron retention	4930494	4930371	-	chr11:4921564-4932930C	c27718/f1p2/3169,c28629/f1p1/3007,c23817/f1p1/2923,c26879/f4p3/3020,c41135/f1p1/2938,c47312/f1p0/2964
chr11	Intron retention	5098668	5099030	+	chr11:5097626-5103081W	c59927/f1p0/3803,c11356/f1p1/2022
chr11	Alternative 3' splice site	5219360	5219417	+	chr11:5217866-5223589W	c2852/f1p1/2067,c30956/f1p1/3021,c31736/f1p1/2668
chr11	Intron retention	5220338	5220789	+	chr11:5217866-5223589W	c30956/f1p1/3021,c2852/f1p1/2067,c31736/f1p1/2668
chr11	Intron retention	5327915	5328076	+	chr11:5325163-5329554W	c11046/f1p0/1875,c33985/f1p0/8369.1.1
chr11	Alternative 3' splice site	5394441	5394422	-	chr11:5392189-5407646C	c32854/f1p0/2707,c4165/f1p0/1790,c45882/f1p0/6775.2,c5243/f1p1/2123
chr11	Intron retention	5601184	5600629	-	chr11:5597331-5601695C	c28383/f1p0/3048,c43718/f1p0/2724
chr11	Alternative 3' splice site	6138462	6138465	+	chr11:6138006-6313686W	c4536/f2p0/2168,c1201/f3p0/2218,c4032/f1p0/2035,c9231/f1p0/2096
chr11	Intron retention	6154639	6154715	+	chr11:6138006-6313686W	c45309/f1p1/2250,c24774/f1p1/2241
chr11	Alternative 5' splice site	6200252	6200274	+	chr11:6138006-6313686W	c59341/f1p1/3699,c34750/f1p0/2873,c38810/f1p0/2993,c52250/f1p0/3238,c52836/f1p2/3536,c53598/f3p2/3694,c61593/f1p1/3636
chr11	Intron retention	6200252	6200367	+	chr11:6138006-6313686W	c44538/f1p0/3247,c52279/f1p0/3625,c56555/f1p1/3766,c59341/f1p1/3699
chr11	Intron retention	6200274	6200367	+	chr11:6138006-6313686W	c44538/f1p0/3247,c52279/f1p0/3625,c56555/f1p1/3766,c34750/f1p0/2873,c38810/f1p0/2993,c52250/f1p0/3238,c52836/f1p2/3536,c53598/f3p2/3694,c61593/f1p1/3636
chr11	Intron retention	6273632	6273556	-	chr11:6271254-6276083C	c29063/f1p2/3045.1,c35189/f1p0/3056,c42797/f1p3/2965,c50620/f1p0/3637.1
chr11	Intron retention	6273634	6273564	-	chr11:6271254-6276083C	c29063/f1p2/3045.1,c35189/f1p0/3056,c42797/f1p3/2965,c16495/f1p0/2953
chr11	Intron retention	6273863	6273840	-	chr11:6271254-6276083C	c29063/f1p2/3045.1,c35189/f1p0/3056,c42797/f1p3/2965,c17954/f1p2/2944
chr11	Exon skipping	6274733	6274616	-	chr11:6271254-6276083C	c2326/f3p0/1651,c6677/f1p2/1632,c15310/f1p0/1768
chr11	Intron retention	6274816	6274673	-	chr11:6271254-6276083C	c17954/f1p2/2944,c39102/f1p1/2842
chr11	Intron retention	6274816	6273403	-	chr11:6271254-6276083C	c29063/f1p2/3045.1,c35189/f1p0/3056,c42797/f1p3/2965,c15310/f1p0/1768
chr11	Intron retention	6274816	6273403	-	chr11:6271254-6276083C	c29063/f1p2/3045.1,c35189/f1p0/3056,c42797/f1p3/2965,c2326/f3p0/1651,c6677/f1p2/1632
chr11	Intron retention	6274816	6273840	-	chr11:6271254-6276083C	c29063/f1p2/3045.1,c35189/f1p0/3056,c42797/f1p3/2965,c39102/f1p1/2842
chr11	Alternative 3' splice site	6275335	6275320	-	chr11:6271254-6276083C	c15310/f1p0/1768,c17954/f1p2/2944,c2326/f3p0/1651,c35189/f1p0/3056,c16495/f1p0/2953,c29063/f1p2/3045.1,c39102/f1p1/2842,c42797/f1p3/2965,c50620/f1p0/3637.1,c6677/f1p2/1632
chr11	Alternative 3' splice site	6357497	6357526	+	chr11:6355828-6360688W	c19473/f1p0/3348,c40374/f3p3/3917,c40990/f1p1/3858
chr11	Alternative 3' splice site	6358919	6358929	+	chr11:6355828-6360688W	c40990/f1p1/3858,c19473/f1p0/3348,c40374/f3p3/3917
chr11	Intron retention	6424731	6424637	-	chr11:6421188-6430985C	c16120/f1p0/2529,c24559/f1p0/3122,c31142/f1p1/2599,c31998/f2p1/2725,c35831/f1p0/2597,c38185/f2p1/2973,c10882/f2p0/2290,c16462/f5p3/2885,c18225/f2p0/2871,c23318/f2p2/2483,c24800/f3p3/2720,c34088/f1p1/2805,c35932/f1p0/2804,c43727/f2p1/2381,c45879/f1p2/3578.1,c8268/f1p0/2299
chr11	Intron retention	6424731	6424637	-	chr11:6421188-6430985C	c15548/f1p0/2914,c28699/f1p0/2871
chr11	Intron retention	6424731	6424637	-	chr11:6421188-6430985C	c32824/f1p0/2741,c43098/f1p1/2925,c23524/f1p0/2907,c30494/f1p0/2689,c33088/f1p0/2675
chr11	Intron retention	6425613	6425325	-	chr11:6421188-6430985C	c36221/f1p0/2887,c24800/f3p3/2720
chr11	Intron retention	6425613	6425325	-	chr11:6421188-6430985C	c23524/f1p0/2907,c30494/f1p0/2689,c33088/f1p0/2675,c16462/f5p3/2885,c23318/f2p2/2483
chr11	Intron retention	6425613	6424637	-	chr11:6421188-6430985C	c39992/f1p1/2767,c43727/f2p1/2381
chr11	Intron retention	6425613	6425325	-	chr11:6421188-6430985C	c39992/f1p1/2767,c16120/f1p0/2529
chr11	Intron retention	6425613	6424637	-	chr11:6421188-6430985C	c32824/f1p0/2741,c43098/f1p1/2925,c16462/f5p3/2885,c23318/f2p2/2483
chr11	Intron retention	6425613	6425325	-	chr11:6421188-6430985C	c32824/f1p0/2741,c43098/f1p1/2925,c31998/f2p1/2725,c35831/f1p0/2597,c38185/f2p1/2973
chr11	Alternative 5' splice site	657329	657375	+	chr11:655024-660822W	c50834/f1p1/3916,c39563/f1p3/3969,c45694/f6p3/3893
chr11	Alternative 5' splice site	685082	685135	+	chr11:680176-685826W	c51489/f1p0/4069,c40611/f1p2/3877,c42009/f4p2/3833,c49234/f8p2/3919,c53000/f1p0/3671,c54916/f1p0/3934.1,c60805/f1p1/3901
chr11	Exon skipping	7395534	7395744	+	chr11:7393886-7400640W	c34590/f1p2/2697,c42163/f1p0/2899,c50387/f1p2/3703,c53700/f1p0/3701.3,c41346/f1p2/3375,c59369/f1p0/3900
chr11	Alternative 5' splice site	7396851	7396930	+	chr11:7393886-7400640W	c42163/f1p0/2899,c34590/f1p2/2697
chr11	Intron retention	7396851	7397505	+	chr11:7393886-7400640W	c41346/f1p2/3375,c50387/f1p2/3703,c42163/f1p0/2899
chr11	Intron retention	7396851	7398817	+	chr11:7393886-7400640W	c59369/f1p0/3900,c42163/f1p0/2899
chr11	Intron retention	7396930	7397505	+	chr11:7393886-7400640W	c41346/f1p2/3375,c50387/f1p2/3703,c34590/f1p2/2697
chr11	Intron retention	7396930	7399261	+	chr11:7393886-7400640W	c59369/f1p0/3900,c34590/f1p2/2697
chr11	Intron retention	7397925	7398197	+	chr11:7393886-7400640W	c53126/f1p0/3406,c44658/f1p1/2764
chr11	Intron retention	7397925	7398574	+	chr11:7393886-7400640W	c41346/f1p2/3375,c50387/f1p2/3703,c44658/f1p1/2764
chr11	Intron retention	7397925	7399261	+	chr11:7393886-7400640W	c59369/f1p0/3900,c44658/f1p1/2764
chr11	Intron retention	7398294	7398574	+	chr11:7393886-7400640W	c59369/f1p0/3900,c53126/f1p0/3406
chr11	Intron retention	7398685	7399261	+	chr11:7393886-7400640W	c53126/f1p0/3406,c44658/f1p1/2764
chr11	Intron retention	7398685	7399261	+	chr11:7393886-7400640W	c59369/f1p0/3900,c41346/f1p2/3375,c50387/f1p2/3703
chr11	Intron retention	7398976	7399261	+	chr11:7393886-7400640W	c42163/f1p0/2899,c34590/f1p2/2697,c41346/f1p2/3375,c44658/f1p1/2764,c50387/f1p2/3703
chr11	Intron retention	7699663	7699580	-	chr11:7698670-7701984C	c19679/f1p0/3019,c29734/f1p0/2959
chr11	Intron retention	7699832	7699749	-	chr11:7698670-7701984C	c29734/f1p0/2959,c24188/f1p0/2884,c28948/f1p0/3257.1
chr11	Intron retention	7699832	7699580	-	chr11:7698670-7701984C	c19679/f1p0/3019,c24188/f1p0/2884
chr11	Intron retention	8187101	8186946	-	chr11:8184429-8188179C	c18589/f1p0/3011,c20996/f1p0/2937,c29309/f1p0/2902,c3299/f1p0/2050,c4702/f2p0/2078
chr11	Alternative 3' splice site	8187170	8187157	-	chr11:8184429-8188179C	c3299/f1p0/2050,c4702/f2p0/2078,c46066/f1p0/2758
chr11	Alternative 5' splice site	8266055	8266096	+	chr11:8264440-8268771W	c17719/f1p0/2786,c29333/f1p0/2667,c33448/f1p0/2658
chr11	Alternative 3' splice site	8789211	8789350	+	chr11:8782128-8790890W	c44596/f3p4/3992,c57918/f3p4/3977,c58909/f6p7/4021,c58990/f5p2/3981,c59739/f1p0/5315.1,c60550/f1p0/3904
chr11	Exon skipping	9440776	9440837	+	chr11:9439088-9441562W	c11223/f1p0/1574,c24055/f1p0/1692.1
chr11	Alternative 3' splice site	9461699	9461664	-	chr11:9460963-9465967C	c46209/f1p0/3205,c62256/f1p0/4044
chr11	Intron retention	9462334	9462246	-	chr11:9460963-9465967C	c46209/f1p0/3205,c62256/f1p0/4044
chr11	Exon skipping	9738672	9738658	-	chr11:9737383-9741790C	c7944/f1p0/1621,c21529/f1p0/2105
chr12	Intron retention	10832264	10831562	-	chr12:10829222-10834789C	c31350/f1p0/3089.1,c16581/f1p0/2732.1
chr12	Intron retention	1122898	1123165	+	chr12:1120966-1124910W	c33394/f1p0/2900,c36635/f1p0/2582
chr12	Intron retention	11481853	11481770	-	chr12:11466164-11484776C	c62042/f1p1/3847,c47020/f1p0/4061.1,c50698/f1p0/3528,c53920/f2p0/4008.3,c61797/f1p2/3725
chr12	Exon skipping	11482893	11482807	-	chr12:11466164-11484776C	c62042/f1p1/3847,c47020/f1p0/4061.2,c50698/f1p0/3528,c53920/f2p0/4008.2,c61797/f1p2/3725
chr12	Intron retention	11578070	11576577	-	chr12:11571035-11579431C	c14381/f6p0/2843,c20549/f1p1/2761,c21750/f4p2/2743,c31381/f1p1/2832,c41613/f1p0/2736,c46512/f1p2/3071,c51970/f1p0/3407,c55877/f9p2/2819,c63256/f2p1/2690,c18585/f1p0/1227
chr12	Alternative 3' splice site	11578167	11578152	-	chr12:11571035-11579431C	c14381/f6p0/2843,c20549/f1p1/2761,c21750/f4p2/2743,c31381/f1p1/2832,c41613/f1p0/2736,c46512/f1p2/3071,c51970/f1p0/3407,c55877/f9p2/2819,c63256/f2p1/2690,c28230/f1p1/2872,c35288/f2p0/2761
chr12	Intron retention	11970328	11970480	+	chr12:11970073-11974465W	c1358/f4p0/2127,c21312/f1p0/1941,c18422/f1p0/1920
chr12	Mutually exclusive exon	11971271	11973523	+	chr12:11970073-11974465W	c1358/f4p0/2127,c21312/f1p0/1941,c6113/f1p0/2036,c9937/f2p0/2059,c18422/f1p0/1920
chr12	Intron retention	1207829	1208478	+	chr12:1204481-1209405W	c6552/f1p0/1654.1,c58540/f1p0/1672
chr12	Alternative 5' splice site	1261760	1261773	+	chr12:1258761-1298910W	c33273/f1p0/2955,c19599/f1p2/2953,c23403/f2p2/3403,c28614/f1p0/2748,c33622/f1p0/3340,c45892/f1p0/3082,c47208/f1p0/3132
chr12	Intron retention	1297357	1297428	+	chr12:1258761-1298910W	c33273/f1p0/2955,c47208/f1p0/3132,c19599/f1p2/2953,c23403/f2p2/3403,c28614/f1p0/2748,c33622/f1p0/3340,c45892/f1p0/3082
chr12	Alternative 3' splice site	13565349	13565362	+	chr12:13407486-13569741W	c13992/f6p0/2802,c25463/f1p3/2777,c34186/f1p4/2880,c38247/f2p4/2965,c21179/f1p0/2625
chr12	Intron retention	13596019	13596170	+	chr12:13592852-13596450W	c40435/f1p0/3846.1,c25121/f1p0/3096.1,c55995/f1p0/3255
chr12	Intron retention	14210278	14210374	+	chr12:14131130-14396863W	c36478/f1p0/2718,c10974/f1p0/1868
chr12	Intron retention	14210278	14210379	+	chr12:14131130-14396863W	c36478/f1p0/2718,c12126/f1p0/1721
chr12	Alternative 3' splice site	14210374	14210379	+	chr12:14131130-14396863W	c10974/f1p0/1868,c12126/f1p0/1721
chr12	Intron retention	14210613	14210966	+	chr12:14131130-14396863W	c36478/f1p0/2718,c10974/f1p0/1868,c12126/f1p0/1721
chr12	Intron retention	14314835	14313697	-	chr12:14299139-14317350C	c55667/f1p1/3635,c7748/f1p1/1983
chr12	Intron retention	14316312	14315777	-	chr12:14299139-14317350C	c55667/f1p1/3635,c7748/f1p1/1983
chr12	Alternative 3' splice site	14676841	14676856	+	chr12:14673120-14715890W	c53155/f1p0/3595,c33759/f2p0/3287
chr12	Alternative 3' splice site	14738929	14738906	-	chr12:14683852-14745006C	c32486/f1p0/2901,c20676/f1p0/2862
chr12	Alternative 3' splice site	14739912	14739902	-	chr12:14683852-14745006C	c32486/f1p0/2901,c20676/f1p0/2862
chr12	Alternative 3' splice site	157111	157119	+	chr12:154053-161593W	c19860/f1p0/3111,c33936/f1p0/2775,c38694/f1p0/2591,c47170/f1p1/3838,c50220/f1p2/3876,c51198/f1p1/3826,c55655/f1p2/4140,c55747/f1p1/3921,c57641/f1p0/4174,c62934/f4p2/4013,c48228/f3p0/4090
chr12	Alternative 3' splice site	158380	158431	+	chr12:154053-161593W	c19860/f1p0/3111,c33936/f1p0/2775,c38694/f1p0/2591,c47170/f1p1/3838,c48228/f3p0/4090,c50220/f1p2/3876,c5106/f1p0/1753,c51198/f1p1/3826,c55655/f1p2/4140,c57641/f1p0/4174,c62934/f4p2/4013,c55747/f1p1/3921
chr12	Intron retention	159827	159923	+	chr12:154053-161593W	c48228/f3p0/4090,c19860/f1p0/3111,c33936/f1p0/2775,c38694/f1p0/2591,c47170/f1p1/3838,c50220/f1p2/3876,c5106/f1p0/1753,c51198/f1p1/3826,c55655/f1p2/4140,c55747/f1p1/3921,c57641/f1p0/4174,c62934/f4p2/4013
chr12	Alternative 3' splice site	15670933	15670942	+	chr12:15663741-15676663W	c52130/f1p2/3733,c62096/f1p0/3980.1,c52535/f2p1/3794,c56520/f1p0/3749,c59206/f1p0/3822
chr12	Intron retention	15672581	15672674	+	chr12:15663741-15676663W	c59206/f1p0/3822,c52130/f1p2/3733,c52535/f2p1/3794,c56520/f1p0/3749,c62096/f1p0/3980.1
chr12	Exon skipping	15675861	15675896	+	chr12:15663741-15676663W	c56520/f1p0/3749,c59206/f1p0/3822,c52535/f2p1/3794,c62096/f1p0/3980.1
chr12	Alternative 3' splice site	15676032	15676039	+	chr12:15663741-15676663W	c52130/f1p2/3733,c56520/f1p0/3749,c59206/f1p0/3822
chr12	Alternative 3' splice site	1627178	1627218	+	chr12:1580587-1627994W	c38698/f2p1/3642,c30931/f1p0/3666
chr12	Mutually exclusive exon	16735488	16730299	-	chr12:16729455-16744843C	c36270/f1p0/2932,c39376/f1p0/3824,c19388/f1p0/3079,c38024/f13p2/3733,c39828/f1p0/2855,c44075/f1p0/2891,c47209/f1p1/3742,c50760/f1p0/3578,c52516/f1p0/3368,c52825/f2p0/3894,c53051/f1p0/3883,c56253/f1p1/3768,c59089/f2p2/3851,c60398/f1p1/3719,c61296/f1p0/3637,c62727/f1p0/3741
chr12	Intron retention	16739334	16739161	-	chr12:16729455-16744843C	c52825/f2p0/3894,c19388/f1p0/3079,c36270/f1p0/2932,c38024/f13p2/3733,c39376/f1p0/3824,c39828/f1p0/2855,c44075/f1p0/2891,c47209/f1p1/3742,c50760/f1p0/3578,c52516/f1p0/3368,c53051/f1p0/3883,c56253/f1p1/3768,c59089/f2p2/3851,c60398/f1p1/3719,c61296/f1p0/3637,c62727/f1p0/3741
chr12	Alternative 3' splice site	16742251	16742198	-	chr12:16729455-16744843C	c50760/f1p0/3578,c53051/f1p0/3883,c62727/f1p0/3741,c19388/f1p0/3079,c36270/f1p0/2932,c38024/f13p2/3733,c39376/f1p0/3824,c44075/f1p0/2891,c47209/f1p1/3742,c52516/f1p0/3368,c52825/f2p0/3894,c56253/f1p1/3768,c59089/f2p2/3851,c60398/f1p1/3719,c61296/f1p0/3637
chr12	Exon skipping	16743214	16743105	-	chr12:16729455-16744843C	c19388/f1p0/3079,c36270/f1p0/2932,c38024/f13p2/3733,c47209/f1p1/3742,c50760/f1p0/3578,c52516/f1p0/3368,c52825/f2p0/3894,c53051/f1p0/3883,c56253/f1p1/3768,c59089/f2p2/3851,c60398/f1p1/3719,c61296/f1p0/3637,c62727/f1p0/3741,c39376/f1p0/3824
chr12	Intron retention	16743755	16743640	-	chr12:16729455-16744843C	c52825/f2p0/3894,c53051/f1p0/3883,c61296/f1p0/3637,c38024/f13p2/3733,c39376/f1p0/3824,c47209/f1p1/3742,c50760/f1p0/3578,c52516/f1p0/3368,c56253/f1p1/3768,c59089/f2p2/3851,c60398/f1p1/3719,c62727/f1p0/3741
chr12	Alternative 5' splice site	17448548	17448593	+	chr12:17445561-17449760W	c16841/f1p0/1769,c21519/f1p0/1824,c25445/f1p0/1869
chr12	Intron retention	17462588	17462500	-	chr12:17461614-17468695C	c59648/f1p0/4051,c32388/f1p1/2726,c52991/f1p0/12978.1,c58729/f10p5/4099,c58956/f10p4/3975
chr12	Intron retention	17525877	17525485	-	chr12:17525265-17531531C	c60640/f1p2/4066,c55937/f1p4/3696
chr12	Alternative 3' splice site	1800124	1800133	+	chr12:1799134-1810679W	c62081/f1p3/4139,c57979/f2p1/4243
chr12	Intron retention	1801455	1801536	+	chr12:1799134-1810679W	c57979/f2p1/4243,c53987/f1p0/4094
chr12	Exon skipping	18176156	18176095	-	chr12:18175568-18423836C	c16322/f1p0/3054,c25023/f1p0/3157,c14272/f2p0/3084,c26716/f2p0/3195
chr12	Intron retention	1823430	1823258	-	chr12:1822042-2045872C	c35697/f1p0/2571,c44360/f1p0/2722.1,c2062/f2p1/2316,c22127/f1p0/2141,c9625/f1p3/2247
chr12	Intron retention	1825021	1824965	-	chr12:1822042-2045872C	c22127/f1p0/2141,c35697/f1p0/2571,c44360/f1p0/2722.1,c2062/f2p1/2316
chr12	Alternative 5' splice site	1825039	1825021	-	chr12:1822042-2045872C	c9625/f1p3/2247,c2062/f2p1/2316
chr12	Intron retention	1825039	1824965	-	chr12:1822042-2045872C	c22127/f1p0/2141,c35697/f1p0/2571,c44360/f1p0/2722.1,c9625/f1p3/2247
chr12	Alternative 3' splice site	19365566	19365577	+	chr12:19363201-19367052W	c19723/f1p0/1666,c10675/f1p0/1649
chr12	Alternative 5' splice site	19444067	19444118	+	chr12:19438954-19462118W	c30464/f1p1/2760,c37846/f14p16/4008,c37861/f29p14/3877,c40091/f1p0/4296,c47018/f1p5/3721,c53262/f1p0/4085,c58139/f7p7/3943,c60219/f1p0/3917,c60935/f1p2/3851,c61175/f1p0/4139,c60529/f1p0/4178
chr12	Intron retention	19446466	19446555	+	chr12:19438954-19462118W	c60219/f1p0/3917,c30464/f1p1/2760,c37846/f14p16/4008,c37861/f29p14/3877,c40091/f1p0/4296,c47018/f1p5/3721,c53262/f1p0/4085,c58139/f7p7/3943,c60529/f1p0/4178,c60935/f1p2/3851,c61175/f1p0/4139
chr12	Alternative 5' splice site	19451026	19451034	+	chr12:19438954-19462118W	c30464/f1p1/2760,c37861/f29p14/3877,c40091/f1p0/4296,c53262/f1p0/4085,c60935/f1p2/3851,c37846/f14p16/4008,c60219/f1p0/3917,c61175/f1p0/4139
chr12	Alternative 5' splice site	19451026	19451079	+	chr12:19438954-19462118W	c30464/f1p1/2760,c37861/f29p14/3877,c40091/f1p0/4296,c53262/f1p0/4085,c60935/f1p2/3851,c58139/f7p7/3943
chr12	Alternative 5' splice site	19451034	19451079	+	chr12:19438954-19462118W	c37846/f14p16/4008,c60219/f1p0/3917,c61175/f1p0/4139,c58139/f7p7/3943
chr12	Intron retention	19596779	19599185	+	chr12:19596613-19602191W	c50756/f1p0/3970,c16943/f1p0/1884
chr12	Intron retention	19596779	19597142	+	chr12:19596613-19602191W	c50756/f1p0/3970,c51647/f2p0/3895
chr12	Intron retention	19597636	19597886	+	chr12:19596613-19602191W	c3028/f1p0/2236,c16943/f1p0/1884,c18161/f1p0/1724
chr12	Intron retention	19597636	19599185	+	chr12:19596613-19602191W	c36349/f1p0/3289,c51647/f2p0/3895,c56507/f1p0/3724,c16943/f1p0/1884,c18161/f1p0/1724
chr12	Intron retention	19597952	19599185	+	chr12:19596613-19602191W	c36349/f1p0/3289,c51647/f2p0/3895,c56507/f1p0/3724,c3028/f1p0/2236
chr12	Intron retention	19599498	19600338	+	chr12:19596613-19602191W	c51647/f2p0/3895,c50756/f1p0/3970
chr12	Intron retention	19599498	19599800	+	chr12:19596613-19602191W	c51647/f2p0/3895,c56507/f1p0/3724
chr12	Intron retention	19599498	19600338	+	chr12:19596613-19602191W	c51647/f2p0/3895,c16943/f1p0/1884,c36349/f1p0/3289
chr12	Intron retention	19599498	19600338	+	chr12:19596613-19602191W	c51647/f2p0/3895,c18161/f1p0/1724
chr12	Intron retention	19599918	19600166	+	chr12:19596613-19602191W	c50756/f1p0/3970,c16943/f1p0/1884,c36349/f1p0/3289
chr12	Alternative 5' splice site	19599918	19600261	+	chr12:19596613-19602191W	c18161/f1p0/1724,c50756/f1p0/3970
chr12	Intron retention	19599918	19600338	+	chr12:19596613-19602191W	c56507/f1p0/3724,c16943/f1p0/1884,c36349/f1p0/3289
chr12	Intron retention	19599918	19600338	+	chr12:19596613-19602191W	c56507/f1p0/3724,c18161/f1p0/1724
chr12	Exon skipping	19600166	19600261	+	chr12:19596613-19602191W	c18161/f1p0/1724,c16943/f1p0/1884,c36349/f1p0/3289
chr12	Intron retention	19600261	19600338	+	chr12:19596613-19602191W	c56507/f1p0/3724,c50756/f1p0/3970
chr12	Alternative 3' splice site	19600312	19600338	+	chr12:19596613-19602191W	c3028/f1p0/2236,c18161/f1p0/1724
chr12	Alternative 3' splice site	19601086	19601106	+	chr12:19596613-19602191W	c16943/f1p0/1884,c3028/f1p0/2236,c36349/f1p0/3289,c50756/f1p0/3970,c51647/f2p0/3895,c56507/f1p0/3724,c18161/f1p0/1724
chr12	Exon skipping	19601474	19601564	+	chr12:19596613-19602191W	c16943/f1p0/1884,c18161/f1p0/1724,c3028/f1p0/2236,c36349/f1p0/3289,c51647/f2p0/3895,c56507/f1p0/3724,c50756/f1p0/3970
chr12	Alternative 3' splice site	19713382	19713323	-	chr12:19710923-19725842C	c33758/f1p2/2579,c30713/f1p2/2548
chr12	Exon skipping	19725258	19725120	-	chr12:19710923-19725842C	c27364/f1p1/2872.1,c30713/f1p2/2548,c33758/f1p2/2579
chr12	Alternative 3' splice site	19752769	19752772	+	chr12:19747526-19756374W	c50368/f1p1/3629,c54549/f1p1/3472,c21857/f1p0/2691,c27003/f4p2/3425,c32075/f1p2/3398,c36518/f1p1/3000,c39515/f1p0/3294,c57524/f1p0/3886.2,c61634/f1p3/3564
chr12	Alternative 5' splice site	19755395	19755398	+	chr12:19747526-19756374W	c21857/f1p0/2691,c27003/f4p2/3425,c39515/f1p0/3294,c57524/f1p0/3886.1
chr12	Alternative 5' splice site	19755395	19755401	+	chr12:19747526-19756374W	c21857/f1p0/2691,c32075/f1p2/3398,c36518/f1p1/3000,c54549/f1p1/3472
chr12	Alternative 5' splice site	19755395	19755400	+	chr12:19747526-19756374W	c21857/f1p0/2691,c50368/f1p1/3629
chr12	Alternative 5' splice site	19755395	19755396	+	chr12:19747526-19756374W	c21857/f1p0/2691,c61634/f1p3/3564
chr12	Alternative 5' splice site	19755396	19755398	+	chr12:19747526-19756374W	c61634/f1p3/3564,c27003/f4p2/3425,c39515/f1p0/3294,c57524/f1p0/3886.1
chr12	Alternative 5' splice site	19755396	19755401	+	chr12:19747526-19756374W	c61634/f1p3/3564,c32075/f1p2/3398,c36518/f1p1/3000,c54549/f1p1/3472
chr12	Alternative 5' splice site	19755396	19755400	+	chr12:19747526-19756374W	c61634/f1p3/3564,c50368/f1p1/3629
chr12	Alternative 5' splice site	19755398	19755401	+	chr12:19747526-19756374W	c27003/f4p2/3425,c39515/f1p0/3294,c57524/f1p0/3886.1,c32075/f1p2/3398,c36518/f1p1/3000,c54549/f1p1/3472
chr12	Alternative 5' splice site	19755398	19755400	+	chr12:19747526-19756374W	c27003/f4p2/3425,c39515/f1p0/3294,c57524/f1p0/3886.1,c50368/f1p1/3629
chr12	Alternative 5' splice site	19755400	19755401	+	chr12:19747526-19756374W	c50368/f1p1/3629,c32075/f1p2/3398,c36518/f1p1/3000,c54549/f1p1/3472
chr12	Alternative 3' splice site	20111860	20111827	-	chr12:20111377-20119132C	c12102/f1p1/1665,c1471/f4p0/2022,c40642/f1p1/3242
chr12	Alternative 5' splice site	20113859	20113813	-	chr12:20111377-20119132C	c12572/f1p0/1891,c882/f4p1/1941,c12102/f1p1/1665,c1471/f4p0/2022,c40642/f1p1/3242
chr12	Alternative 5' splice site	20113864	20113813	-	chr12:20111377-20119132C	c14761/f1p1/3252,c12102/f1p1/1665,c1471/f4p0/2022,c40642/f1p1/3242
chr12	Alternative 5' splice site	20113864	20113859	-	chr12:20111377-20119132C	c14761/f1p1/3252,c12572/f1p0/1891,c882/f4p1/1941
chr12	Intron retention	20113927	20113878	-	chr12:20111377-20119132C	c12102/f1p1/1665,c1471/f4p0/2022,c40642/f1p1/3242,c25792/f2p1/1950
chr12	Alternative 3' splice site	20116654	20115383	-	chr12:20111377-20119132C	c14761/f1p1/3252,c1471/f4p0/2022
chr12	Alternative 5' splice site	20117562	20117560	-	chr12:20111377-20119132C	c25792/f2p1/1950,c882/f4p1/1941,c1471/f4p0/2022
chr12	Alternative 3' splice site	20117829	20117782	-	chr12:20111377-20119132C	c882/f4p1/1941,c12572/f1p0/1891
chr12	Alternative 3' splice site	20117829	20117782	-	chr12:20111377-20119132C	c1471/f4p0/2022,c14761/f1p1/3252
chr12	Mutually exclusive exon	20117829	20117562	-	chr12:20111377-20119132C	c1471/f4p0/2022,c12572/f1p0/1891
chr12	Alternative 5' splice site	20199308	20199315	+	chr12:20197174-20204621W	c1828/f3p1/2030,c24589/f1p1/2012,c3522/f3p0/1986,c39399/f1p1/3935,c59241/f1p0/4914,c61877/f1p0/4022,c62392/f1p1/3560,c59283/f1p2/3546
chr12	Intron retention	20200851	20202981	+	chr12:20197174-20204621W	c39399/f1p1/3935,c59241/f1p0/4914,c61877/f1p0/4022,c1828/f3p1/2030,c24589/f1p1/2012,c3522/f3p0/1986
chr12	Intron retention	20200851	20201419	+	chr12:20197174-20204621W	c39399/f1p1/3935,c59241/f1p0/4914,c61877/f1p0/4022,c59283/f1p2/3546,c62392/f1p1/3560
chr12	Alternative 3' splice site	20201419	20202981	+	chr12:20197174-20204621W	c59283/f1p2/3546,c62392/f1p1/3560,c1828/f3p1/2030,c24589/f1p1/2012,c3522/f3p0/1986
chr12	Exon skipping	20686450	20686541	+	chr12:20682469-20774266W	c24462/f1p0/1729,c6893/f1p0/1843,c772/f6p0/1808
chr12	Intron retention	209924	210003	+	chr12:208564-211592W	c12874/f1p0/1832,c11517/f1p0/1676
chr12	Intron retention	209924	210003	+	chr12:208564-211592W	c19842/f1p0/1863,c19031/f1p0/1880.1,c4521/f1p0/1891,c63488/f1p0/1786,c8718/f1p0/1598
chr12	Intron retention	209924	210350	+	chr12:208564-211592W	c12936/f1p0/2103,c11517/f1p0/1676
chr12	Intron retention	209924	210350	+	chr12:208564-211592W	c12936/f1p0/2103,c19031/f1p0/1880.1,c4521/f1p0/1891,c63488/f1p0/1786,c8718/f1p0/1598
chr12	Intron retention	209924	210357	+	chr12:208564-211592W	c12936/f1p0/2103,c13253/f9p3/1801
chr12	Alternative 5' splice site	210128	210137	+	chr12:208564-211592W	c11517/f1p0/1676,c19031/f1p0/1880.1,c4521/f1p0/1891,c63488/f1p0/1786,c8718/f1p0/1598
chr12	Alternative 5' splice site	210128	210137	+	chr12:208564-211592W	c12874/f1p0/1832,c19842/f1p0/1863
chr12	Intron retention	210128	210350	+	chr12:208564-211592W	c12936/f1p0/2103,c12874/f1p0/1832
chr12	Intron retention	210137	210350	+	chr12:208564-211592W	c12936/f1p0/2103,c19842/f1p0/1863
chr12	Intron retention	210637	210718	+	chr12:208564-211592W	c4521/f1p0/1891,c11517/f1p0/1676,c12874/f1p0/1832,c12936/f1p0/2103,c13253/f9p3/1801,c19031/f1p0/1880.1,c19842/f1p0/1863,c63488/f1p0/1786,c8718/f1p0/1598
chr12	Alternative 5' splice site	2140151	2140345	+	chr12:2140020-2486069W	c2029/f5p2/1981,c2030/f3p1/2135
chr12	Intron retention	2166309	2165973	-	chr12:2165093-2494134C	c43908/f1p0/2977,c8604/f1p0/1637
chr12	Intron retention	2166565	2166475	-	chr12:2165093-2494134C	c11950/f1p0/1748,c8604/f1p0/1637
chr12	Alternative 5' splice site	223388	223379	-	chr12:219861-227882C	c43577/f1p0/1133,c15073/f1p0/2071
chr12	Alternative 3' splice site	22096532	22096511	-	chr12:22095693-22097441C	c18955/f1p0/1070,c36203/f1p0/1052
chr12	Alternative 5' splice site	22506313	22506390	+	chr12:22503944-22507746W	c19992/f1p0/1705,c24531/f1p0/2714
chr12	Intron retention	2351829	2351656	-	chr12:2347496-2353874C	c29526/f1p0/3210.1,c17136/f1p0/2782,c28187/f1p0/2538.1
chr12	Intron retention	2352955	2352844	-	chr12:2347496-2353874C	c17136/f1p0/2782,c28187/f1p0/2538.1
chr12	Alternative 5' splice site	2446217	2446216	-	chr12:2424275-2449687C	c14402/f5p4/2817,c43060/f1p1/2907,c58647/f4p4/2598,c23652/f1p1/3272.1
chr12	Intron retention	2448275	2448184	-	chr12:2424275-2449687C	c32644/f1p1/2858,c14402/f5p4/2817,c23652/f1p1/3272.1,c35646/f1p0/2652,c43060/f1p1/2907,c58647/f4p4/2598
chr12	Alternative 3' splice site	2471317	2471405	+	chr12:2464399-2472274W	c37725/f22p16/3989,c42614/f1p0/3953,c57606/f1p3/3916,c57916/f6p14/3818,c61292/f1p6/3696,c51493/f1p3/3892
chr12	Intron retention	24689266	24689189	-	chr12:24684135-24692661C	c56620/f1p0/3518.1,c61453/f1p0/3829.1,c43013/f1p1/3158
chr12	Intron retention	24689427	24689337	-	chr12:24684135-24692661C	c51997/f1p1/3754.3,c56620/f1p0/3518.1,c61453/f1p0/3829.1
chr12	Intron retention	24690114	24690035	-	chr12:24684135-24692661C	c51997/f1p1/3754.2,c61453/f1p0/3829.2
chr12	Intron retention	24690273	24690185	-	chr12:24684135-24692661C	c61453/f1p0/3829.2,c43013/f1p1/3158
chr12	Alternative 5' splice site	2482126	2482317	+	chr12:2481855-2492314W	c8705/f1p0/1907,c19766/f1p1/2290
chr12	Alternative 3' splice site	25264524	25264532	+	chr12:25262869-25268008W	c1244/f3p0/2072,c3373/f1p0/2253,c29643/f1p0/3540.1
chr12	Exon skipping	25646262	25646153	-	chr12:25633394-25656219C	c62305/f1p0/3320,c59595/f1p0/3751
chr12	Intron retention	25972009	25971887	-	chr12:25969784-25981547C	c38731/f1p0/3596,c50322/f1p1/3580,c32865/f1p1/3129,c9039/f1p1/1645
chr12	Alternative 3' splice site	25973451	25973432	-	chr12:25969784-25981547C	c32865/f1p1/3129,c38731/f1p0/3596,c50322/f1p1/3580,c9039/f1p1/1645
chr12	Alternative 3' splice site	25974617	25974614	-	chr12:25969784-25981547C	c32865/f1p1/3129,c38731/f1p0/3596,c50322/f1p1/3580
chr12	Intron retention	265595	265659	+	chr12:261696-664180W	c39082/f1p0/3560.2,c19867/f1p0/3183
chr12	Intron retention	265600	265662	+	chr12:261696-664180W	c39082/f1p0/3560.2,c9116/f1p0/1937
chr12	Alternative 5' splice site	26486655	26486687	+	chr12:26486576-26494690W	c6225/f1p0/2232,c2068/f4p0/2331
chr12	Alternative 3' splice site	27996639	27996892	+	chr12:27992570-27999456W	c59176/f1p2/3695,c22514/f1p0/3016,c30706/f1p1/3475
chr12	Alternative 3' splice site	27996639	27996894	+	chr12:27992570-27999456W	c59176/f1p2/3695,c30551/f1p3/3159
chr12	Alternative 3' splice site	27996892	27996894	+	chr12:27992570-27999456W	c22514/f1p0/3016,c30706/f1p1/3475,c30551/f1p3/3159
chr12	Alternative 3' splice site	29047215	29047233	+	chr12:29029559-29048552W	c25618/f5p3/1872,c7197/f1p0/1875
chr12	Intron retention	30095783	30095879	+	chr12:30093132-30097781W	c49619/f2p2/3793,c55952/f1p2/3759,c56857/f1p0/3793,c49966/f2p1/3702
chr12	Intron retention	30137714	30137588	-	chr12:30135774-30202342C	c27282/f1p1/2796,c14671/f4p2/2990,c36900/f2p1/2835
chr12	Intron retention	30187334	30187245	-	chr12:30135774-30202342C	c39356/f1p2/3898,c53268/f1p0/3943,c55008/f1p0/3916,c62183/f1p0/3711,c62269/f1p0/3774
chr12	Intron retention	30187334	30187245	-	chr12:30135774-30202342C	c52920/f1p2/3837,c55369/f1p2/3744
chr12	Intron retention	30188687	30188504	-	chr12:30135774-30202342C	c39356/f1p2/3898,c52920/f1p2/3837,c53268/f1p0/3943,c54201/f3p0/3846,c55369/f1p2/3744,c62183/f1p0/3711,c62269/f1p0/3774,c55008/f1p0/3916
chr12	Intron retention	30667477	30666472	-	chr12:30663746-30674584C	c50898/f1p0/3773,c18954/f2p0/2326,c21585/f1p0/2703,c44853/f1p0/3697,c48195/f1p0/3409,c50462/f1p0/3788,c61535/f1p0/3669.1
chr12	Intron retention	30668907	30667967	-	chr12:30663746-30674584C	c50898/f1p0/3773,c18954/f2p0/2326
chr12	Intron retention	30670097	30669873	-	chr12:30663746-30674584C	c54487/f1p0/3524,c60712/f1p1/3686,c35032/f4p2/3460,c44853/f1p0/3697,c48195/f1p0/3409,c50462/f1p0/3788,c59260/f1p1/3536,c61535/f1p0/3669.1
chr12	Alternative 3' splice site	30850921	30850930	+	chr12:30846903-30857651W	c50145/f2p0/3798,c42383/f1p1/3855
chr12	Intron retention	30894689	30894774	+	chr12:30893898-30901799W	c30451/f1p2/3042,c62578/f1p1/3902,c21263/f1p0/3002.1,c22911/f1p2/2987,c42093/f1p1/3240,c43749/f1p1/3256,c49736/f2p1/3763.1,c55606/f1p1/3845,c60676/f1p0/3832.2
chr12	Alternative 3' splice site	30898447	30898450	+	chr12:30893898-30901799W	c21263/f1p0/3002.1,c30451/f1p2/3042,c42093/f1p1/3240,c43749/f1p1/3256,c49736/f2p1/3763.1,c60676/f1p0/3832.1,c61330/f1p0/3830.1,c22911/f1p2/2987
chr12	Alternative 5' splice site	30898865	30898881	+	chr12:30893898-30901799W	c43749/f1p1/3256,c21263/f1p0/3002.1,c22911/f1p2/2987,c30451/f1p2/3042,c49736/f2p1/3763.1
chr12	Intron retention	30898865	30898960	+	chr12:30893898-30901799W	c60676/f1p0/3832.1,c61330/f1p0/3830.1,c62578/f1p1/3902,c43749/f1p1/3256
chr12	Intron retention	30898881	30898960	+	chr12:30893898-30901799W	c42093/f1p1/3240,c21263/f1p0/3002.1,c22911/f1p2/2987,c30451/f1p2/3042
chr12	Intron retention	30898881	30899304	+	chr12:30893898-30901799W	c60676/f1p0/3832.1,c61330/f1p0/3830.1,c62578/f1p1/3902,c21263/f1p0/3002.1,c22911/f1p2/2987,c30451/f1p2/3042
chr12	Intron retention	30898881	30899304	+	chr12:30893898-30901799W	c60676/f1p0/3832.1,c61330/f1p0/3830.1,c62578/f1p1/3902,c49736/f2p1/3763.1
chr12	Intron retention	30899027	30899143	+	chr12:30893898-30901799W	c49736/f2p1/3763.1,c21263/f1p0/3002.1,c22911/f1p2/2987,c30451/f1p2/3042
chr12	Intron retention	30899027	30899304	+	chr12:30893898-30901799W	c43749/f1p1/3256,c21263/f1p0/3002.1,c22911/f1p2/2987,c30451/f1p2/3042
chr12	Intron retention	30899027	30899304	+	chr12:30893898-30901799W	c60676/f1p0/3832.1,c61330/f1p0/3830.1,c62578/f1p1/3902,c42093/f1p1/3240
chr12	Intron retention	30899215	30899304	+	chr12:30893898-30901799W	c43749/f1p1/3256,c49736/f2p1/3763.1
chr12	Alternative 5' splice site	30929204	30928886	-	chr12:30927361-30931570C	c29739/f1p1/1346,c8564/f1p1/1628
chr12	Exon skipping	30936530	30936448	-	chr12:30933740-30942749C	c43558/f1p2/2970,c26357/f6p7/3214,c34890/f1p1/2995
chr12	Alternative 3' splice site	31160316	31160418	+	chr12:31159345-31165517W	c53079/f1p0/3540,c55504/f1p0/3567,c62633/f1p1/3995,c21196/f2p4/3405,c23033/f2p1/3352,c30268/f1p0/3272,c42746/f1p1/3575,c43067/f1p0/3879,c44600/f1p2/3383,c45658/f1p0/4239.2,c48312/f1p0/3548,c52422/f1p0/3818,c52578/f1p3/4053,c53956/f1p0/3683,c55246/f1p4/3943,c57364/f1p1/3631,c60810/f1p1/3689,c61345/f1p1/3651
chr12	Alternative 5' splice site	31161353	31161460	+	chr12:31159345-31165517W	c42746/f1p1/3575,c21196/f2p4/3405,c23033/f2p1/3352,c30268/f1p0/3272,c32108/f1p1/2747,c34879/f1p0/3214.2,c44600/f1p2/3383,c47142/f1p0/3078,c48312/f1p0/3548,c52422/f1p0/3818,c52578/f1p3/4053,c53079/f1p0/3540,c55246/f1p4/3943,c55504/f1p0/3567,c57364/f1p1/3631,c60810/f1p1/3689,c61345/f1p1/3651,c62633/f1p1/3995
chr12	Intron retention	31161353	31161543	+	chr12:31159345-31165517W	c43067/f1p0/3879,c53956/f1p0/3683,c42746/f1p1/3575
chr12	Intron retention	31161460	31161543	+	chr12:31159345-31165517W	c43067/f1p0/3879,c53956/f1p0/3683,c21196/f2p4/3405,c23033/f2p1/3352,c30268/f1p0/3272,c32108/f1p1/2747,c44600/f1p2/3383,c47142/f1p0/3078,c48312/f1p0/3548,c52422/f1p0/3818,c52578/f1p3/4053,c53079/f1p0/3540,c55246/f1p4/3943,c55504/f1p0/3567,c57364/f1p1/3631,c60810/f1p1/3689,c61345/f1p1/3651,c62633/f1p1/3995
chr12	Intron retention	31162886	31163070	+	chr12:31159345-31165517W	c42746/f1p1/3575,c43067/f1p0/3879,c52422/f1p0/3818,c53956/f1p0/3683,c55504/f1p0/3567,c57364/f1p1/3631,c21196/f2p4/3405,c23033/f2p1/3352,c30268/f1p0/3272,c32108/f1p1/2747,c34879/f1p0/3214.1,c44600/f1p2/3383,c47142/f1p0/3078,c48312/f1p0/3548,c52578/f1p3/4053,c53079/f1p0/3540,c55246/f1p4/3943,c60810/f1p1/3689
chr12	Intron retention	31162886	31162989	+	chr12:31159345-31165517W	c42746/f1p1/3575,c43067/f1p0/3879,c52422/f1p0/3818,c53956/f1p0/3683,c55504/f1p0/3567,c57364/f1p1/3631,c61345/f1p1/3651,c62633/f1p1/3995
chr12	Intron retention	31162906	31163020	+	chr12:31159345-31165517W	c42746/f1p1/3575,c43067/f1p0/3879,c52422/f1p0/3818,c53956/f1p0/3683,c55504/f1p0/3567,c57364/f1p1/3631,c45658/f1p0/4239.1
chr12	Alternative 3' splice site	31162989	31163070	+	chr12:31159345-31165517W	c61345/f1p1/3651,c62633/f1p1/3995,c21196/f2p4/3405,c23033/f2p1/3352,c30268/f1p0/3272,c32108/f1p1/2747,c34879/f1p0/3214.1,c44600/f1p2/3383,c47142/f1p0/3078,c48312/f1p0/3548,c52578/f1p3/4053,c53079/f1p0/3540,c55246/f1p4/3943,c60810/f1p1/3689
chr12	Alternative 5' splice site	31343926	31343923	-	chr12:31339209-31347287C	c54340/f3p3/3807,c18496/f1p4/3455,c38459/f8p4/3789
chr12	Intron retention	31345062	31344956	-	chr12:31339209-31347287C	c54340/f3p3/3807,c18496/f1p4/3455,c32927/f1p0/2930,c38459/f8p4/3789
chr12	Intron retention	31381538	31381640	+	chr12:31377922-31384402W	c62210/f1p0/3921,c53699/f1p0/3765,c54992/f1p0/3839
chr12	Intron retention	31611002	31610520	-	chr12:31606990-32046880C	c34320/f1p0/2816,c3368/f1p1/2006
chr12	Intron retention	31611745	31611052	-	chr12:31606990-32046880C	c28572/f1p0/2682,c3368/f1p1/2006
chr12	Intron retention	32028313	32028398	+	chr12:32026692-32030784W	c8530/f1p0/1620,c12263/f1p0/1612
chr12	Intron retention	32887315	32887404	+	chr12:32882905-32889448W	c31322/f2p3/2734,c16015/f2p4/2571,c43540/f1p0/2930
chr12	Alternative 3' splice site	32956121	32956037	-	chr12:32953063-32970079C	c18061/f1p0/2891,c40757/f2p1/4037,c44256/f1p0/2822,c50667/f1p0/3625,c54019/f1p0/3959,c5816/f1p0/1795,c50273/f1p0/4035
chr12	Intron retention	33282873	33282972	+	chr12:33282471-33299766W	c62619/f1p2/3809,c2348/f2p0/1574
chr12	Intron retention	33453172	33453035	-	chr12:33451426-33459998C	c29610/f1p1/3016,c12835/f1p0/1971
chr12	Alternative 5' splice site	33453173	33453172	-	chr12:33451426-33459998C	c32086/f1p3/2761,c12835/f1p0/1971
chr12	Intron retention	33453173	33453035	-	chr12:33451426-33459998C	c29610/f1p1/3016,c32086/f1p3/2761
chr12	Mutually exclusive exon	33458078	33454842	-	chr12:33451426-33459998C	c29610/f1p1/3016,c32086/f1p3/2761,c13489/f22p3/2918
chr12	Exon skipping	34142519	34142671	+	chr12:34137966-34144614W	c5235/f1p0/1739,c11071/f1p2/2135,c6011/f1p0/1945,c8895/f1p2/2240
chr12	Exon skipping	34375216	34375504	+	chr12:34374948-34378977W	c38336/f2p6/3848,c61445/f1p0/3684,c52082/f1p0/3975,c56358/f1p2/3852
chr12	Exon skipping	34375216	34375331	+	chr12:34374948-34378977W	c38336/f2p6/3848,c61445/f1p0/3684,c61819/f1p1/3781
chr12	Alternative 5' splice site	34375331	34375504	+	chr12:34374948-34378977W	c61819/f1p1/3781,c52082/f1p0/3975,c56358/f1p2/3852
chr12	Exon skipping	34507668	34507597	-	chr12:34487658-34509509C	c43785/f2p0/4047,c55104/f1p1/4053
chr12	Alternative 3' splice site	34767992	34768013	+	chr12:34766852-34772823W	c22652/f1p0/3088,c40786/f5p1/3614,c42080/f1p0/3526,c50938/f1p0/3892.2,c52052/f1p0/3658.2,c60255/f1p0/3411,c62725/f1p0/3700,c50761/f1p0/3495
chr12	Alternative 5' splice site	34769575	34769589	+	chr12:34766852-34772823W	c40786/f5p1/3614,c60255/f1p0/3411,c50938/f1p0/3892.1,c62725/f1p0/3700
chr12	Intron retention	34770521	34770606	+	chr12:34766852-34772823W	c40786/f5p1/3614,c42080/f1p0/3526,c50761/f1p0/3495,c50938/f1p0/3892.1,c60255/f1p0/3411
chr12	Intron retention	34770521	34771357	+	chr12:34766852-34772823W	c62725/f1p0/3700,c60255/f1p0/3411
chr12	Intron retention	34770539	34771021	+	chr12:34766852-34772823W	c40786/f5p1/3614,c42080/f1p0/3526,c50761/f1p0/3495,c50938/f1p0/3892.1,c22652/f1p0/3088
chr12	Intron retention	34770539	34771357	+	chr12:34766852-34772823W	c62725/f1p0/3700,c22652/f1p0/3088
chr12	Intron retention	34771267	34771357	+	chr12:34766852-34772823W	c62725/f1p0/3700,c40786/f5p1/3614,c42080/f1p0/3526,c50761/f1p0/3495,c50938/f1p0/3892.1
chr12	Intron retention	34992594	34992376	-	chr12:34956065-34998452C	c21702/f1p0/1915,c23153/f1p0/1684,c10122/f1p1/1936,c1737/f2p0/1496
chr12	Alternative 5' splice site	34996918	34996882	-	chr12:34956065-34998452C	c10122/f1p1/1936,c1737/f2p0/1496,c23153/f1p0/1684,c21702/f1p0/1915
chr12	Exon skipping	35019703	35019629	-	chr12:35009957-35022753C	c2230/f2p0/1894,c16792/f2p0/2001,c1818/f3p1/2000
chr12	Intron retention	35053109	35053324	+	chr12:35051966-35057254W	c30092/f2p2/2827,c31785/f1p2/2798,c33613/f1p0/2600
chr12	Intron retention	35053109	35054587	+	chr12:35051966-35057254W	c52835/f1p0/3641,c62694/f1p0/3907,c33613/f1p0/2600
chr12	Intron retention	35053519	35054587	+	chr12:35051966-35057254W	c52835/f1p0/3641,c62694/f1p0/3907,c30092/f2p2/2827,c31785/f1p2/2798
chr12	Intron retention	35056646	35056724	+	chr12:35051966-35057254W	c62694/f1p0/3907,c30092/f2p2/2827,c31785/f1p2/2798,c33613/f1p0/2600,c52835/f1p0/3641
chr12	Alternative 5' splice site	35065216	35065251	+	chr12:35063325-35428279W	c18998/f1p0/2784.1,c12420/f1p0/2143
chr12	Intron retention	35065216	35065449	+	chr12:35063325-35428279W	c5811/f1p0/1885,c18998/f1p0/2784.1
chr12	Intron retention	35065251	35065449	+	chr12:35063325-35428279W	c5811/f1p0/1885,c12420/f1p0/2143
chr12	Alternative 3' splice site	35142668	35142611	-	chr12:35138104-35553349C	c18271/f1p0/3266,c40270/f1p3/3782,c41845/f5p9/3921,c41993/f1p1/3898,c45816/f3p9/3874,c52305/f1p0/3616.1,c55291/f1p0/3750,c55744/f1p0/4577.1,c56608/f1p0/3879.1,c58149/f1p0/3687,c59004/f4p9/3773,c60079/f1p0/3770,c61926/f1p1/3895,c50299/f1p2/3738
chr12	Intron retention	35145524	35145433	-	chr12:35138104-35553349C	c60079/f1p0/3770,c61926/f1p1/3895,c18271/f1p0/3266,c40270/f1p3/3782,c41845/f5p9/3921,c41993/f1p1/3898,c45816/f3p9/3874,c50299/f1p2/3738,c55291/f1p0/3750,c55408/f1p0/3845.1,c55744/f1p0/4577.1,c58149/f1p0/3687,c59004/f4p9/3773
chr12	Intron retention	35592163	35591976	-	chr12:35590702-35604687C	c35539/f1p0/3036.1,c1706/f2p0/1723,c32243/f1p0/2798,c34572/f1p0/3037,c40915/f1p0/2561.1
chr12	Intron retention	35593880	35593164	-	chr12:35590702-35604687C	c32243/f1p0/2798,c1706/f2p0/1723
chr12	Intron retention	35603677	35603387	-	chr12:35590702-35604687C	c32243/f1p0/2798,c35539/f1p0/3036.1
chr12	Intron retention	35603882	35603769	-	chr12:35590702-35604687C	c35539/f1p0/3036.1,c1706/f2p0/1723,c34572/f1p0/3037,c40915/f1p0/2561.2
chr12	Intron retention	35603882	35603387	-	chr12:35590702-35604687C	c32243/f1p0/2798,c1706/f2p0/1723,c34572/f1p0/3037,c40915/f1p0/2561.2
chr12	Intron retention	36038567	36038414	-	chr12:36037171-36041704C	c29744/f1p0/2788,c36131/f1p0/3040.1
chr12	Intron retention	36041442	36041203	-	chr12:36037171-36041704C	c52376/f1p0/3558.1,c13772/f5p2/2838,c23627/f1p3/2886
chr12	Alternative 3' splice site	37669269	37669268	-	chr12:37667810-38405885C	c23496/f1p0/2666,c38831/f1p1/2725.1,c46208/f1p1/2554,c46925/f1p1/2930
chr12	Alternative 3' splice site	38403229	38402923	-	chr12:37667810-38405885C	c21545/f1p1/2888,c46925/f1p1/2930,c23496/f1p0/2666,c38831/f1p1/2725.1,c46208/f1p1/2554
chr12	Alternative 5' splice site	38404335	38404323	-	chr12:37667810-38405885C	c23496/f1p0/2666,c46208/f1p1/2554,c21545/f1p1/2888,c46925/f1p1/2930
chr12	Alternative 3' splice site	38196209	38196168	-	chr12:38192709-38197448C	c36428/f1p0/2938.2,c47449/f1p0/3200.2,c47801/f1p0/2536
chr12	Alternative 3' splice site	38486804	38486812	+	chr12:38479722-38489641W	c12241/f1p0/2240,c6148/f1p0/2198
chr12	Alternative 3' splice site	38639552	38639758	+	chr12:38631690-38640908W	c28749/f1p1/3119,c52289/f1p0/4094.1
chr12	Alternative 3' splice site	38667832	38667831	-	chr12:38665207-38668753C	c25546/f1p1/1890,c4531/f1p0/1612,c21109/f1p1/1762
chr12	Intron retention	38849844	38849762	-	chr12:38845847-38856684C	c58162/f2p3/4115,c28586/f1p2/2907,c38070/f5p8/3796,c42040/f1p1/3896,c47232/f1p0/3959,c50077/f1p0/3712,c50887/f1p4/4063,c52651/f1p3/3861,c53280/f1p4/3691,c53958/f1p1/3567,c55554/f1p0/4935.2,c58121/f1p4/3669,c59714/f1p0/3779,c62823/f1p0/4055,c63179/f2p3/3946,c63626/f2p11/4114
chr12	Intron retention	38853551	38853445	-	chr12:38845847-38856684C	c59714/f1p0/3779,c14470/f2p0/2779,c28586/f1p2/2907,c38070/f5p8/3796,c42040/f1p1/3896,c47232/f1p0/3959,c50077/f1p0/3712,c50887/f1p4/4063,c52651/f1p3/3861,c53280/f1p4/3691,c53958/f1p1/3567,c55554/f1p0/4935.2,c58121/f1p4/3669,c58162/f2p3/4115,c62823/f1p0/4055,c63179/f2p3/3946,c63626/f2p11/4114
chr12	Intron retention	38855206	38855091	-	chr12:38845847-38856684C	c50887/f1p4/4063,c55554/f1p0/4935.1,c14470/f2p0/2779,c38070/f5p8/3796,c42040/f1p1/3896,c47232/f1p0/3959,c50077/f1p0/3712,c52651/f1p3/3861,c53280/f1p4/3691,c53958/f1p1/3567,c58121/f1p4/3669,c58162/f2p3/4115,c59714/f1p0/3779,c62823/f1p0/4055,c63179/f2p3/3946,c63626/f2p11/4114
chr12	Intron retention	38982282	38982721	+	chr12:38980161-38987435W	c54455/f1p1/4236,c20189/f1p3/3322,c24440/f1p0/2854,c27086/f1p1/3112,c37839/f45p10/3726,c37862/f13p7/3768,c39512/f1p0/3818,c41799/f3p9/3862,c43515/f1p0/3356,c45645/f1p0/3844,c46064/f1p0/3798,c46892/f12p10/3893,c50116/f1p0/3579.1,c51090/f1p0/3869,c52792/f1p3/3770,c53011/f2p2/3747,c53762/f1p0/3543,c54073/f1p0/3555,c54449/f1p0/3737,c56301/f1p1/3671,c56606/f1p1/3734,c59321/f1p0/4961.1,c60184/f1p1/3664…
chr12	Alternative 3' splice site	38983155	38983210	+	chr12:38980161-38987435W	c20189/f1p3/3322,c24440/f1p0/2854,c27086/f1p1/3112,c34970/f1p3/2748,c37839/f45p10/3726,c37862/f13p7/3768,c39512/f1p0/3818,c41799/f3p9/3862,c43515/f1p0/3356,c45645/f1p0/3844,c46064/f1p0/3798,c46892/f12p10/3893,c51090/f1p0/3869,c52792/f1p3/3770,c53011/f2p2/3747,c53762/f1p0/3543,c54073/f1p0/3555,c54449/f1p0/3737,c54455/f1p1/4236,c56301/f1p1/3671,c60184/f1p1/3664,c60663/f1p0/3239,c60932/f1p2/3874.1,c…
chr12	Alternative 3' splice site	38985200	38985246	+	chr12:38980161-38987435W	c20189/f1p3/3322,c24440/f1p0/2854,c27086/f1p1/3112,c34970/f1p3/2748,c37839/f45p10/3726,c37862/f13p7/3768,c39512/f1p0/3818,c41799/f3p9/3862,c43515/f1p0/3356,c45645/f1p0/3844,c46064/f1p0/3798,c46892/f12p10/3893,c51090/f1p0/3869,c53011/f2p2/3747,c53762/f1p0/3543,c54073/f1p0/3555,c54449/f1p0/3737,c54455/f1p1/4236,c54772/f1p0/9874.3,c56301/f1p1/3671,c56606/f1p1/3734,c60184/f1p1/3664,c60663/f1p0/3239,c…
chr12	Alternative 3' splice site	38986450	38986507	+	chr12:38980161-38987435W	c27086/f1p1/3112,c53762/f1p0/3543,c43515/f1p0/3356,c54073/f1p0/3555
chr12	Intron retention	39150264	39149783	-	chr12:39144590-39419182C	c3613/f1p0/1913,c51247/f1p1/3723.1
chr12	Mutually exclusive exon	3931755	3927338	-	chr12:3926924-4089742C	c12801/f1p3/1846,c1451/f3p3/1982,c457/f13p4/1981,c47637/f1p0/2164
chr12	Intron retention	3934372	3934247	-	chr12:3926924-4089742C	c47637/f1p0/2164,c12801/f1p3/1846,c457/f13p4/1981
chr12	Intron retention	39274605	39274674	+	chr12:39273304-39277974W	c37753/f45p12/3708,c40282/f2p1/3538,c49208/f7p7/3659,c50427/f1p0/4422.1,c59271/f1p0/3366,c63756/f2p5/3737,c59922/f1p1/3596
chr12	Intron retention	39277475	39277608	+	chr12:39273304-39277974W	c38751/f1p0/2852,c51689/f1p0/3621,c59271/f1p0/3366,c51124/f1p0/3375
chr12	Intron retention	39324122	39322043	-	chr12:39320666-39324248C	c35854/f1p0/2868,c23714/f1p0/754
chr12	Exon skipping	39559747	39559868	+	chr12:39557297-39562127W	c7141/f1p0/1910,c6280/f1p0/1737,c950/f5p4/1790,c9521/f1p2/2075
chr12	Intron retention	39560936	39561208	+	chr12:39557297-39562127W	c7141/f1p0/1910,c6280/f1p0/1737,c950/f5p4/1790,c9521/f1p2/2075
chr12	Intron retention	39777034	39776953	-	chr12:39774781-39779430C	c24229/f1p1/2720,c36674/f1p0/2777,c16694/f1p0/1998
chr12	Alternative 3' splice site	39880447	39880444	-	chr12:39866952-39882339C	c47528/f1p1/2978,c62006/f1p0/3709.1
chr12	Intron retention	39904166	39904347	+	chr12:39900288-39907994W	c60580/f1p2/3452,c17855/f1p0/3431,c35828/f1p0/4050.1,c38871/f1p2/3161,c45672/f1p0/2928,c50655/f1p0/3215
chr12	Exon skipping	39907039	39907116	+	chr12:39900288-39907994W	c50655/f1p0/3215,c17855/f1p0/3431,c35828/f1p0/4050.1,c38871/f1p2/3161,c45672/f1p0/2928,c60580/f1p2/3452
chr12	Alternative 3' splice site	39918381	39918362	-	chr12:39915517-39960626C	c30537/f1p3/3309,c41322/f5p17/3850,c41906/f1p0/2950,c45862/f4p5/3756,c49551/f4p15/3844,c52222/f1p0/3812.2,c52746/f1p0/11189.1,c55801/f2p2/3752,c64169/f3p3/3655,c57560/f2p0/3737
chr12	Intron retention	39956882	39956799	-	chr12:39915517-39960626C	c55801/f2p2/3752,c30537/f1p3/3309,c45862/f4p5/3756,c57560/f2p0/3737
chr12	Intron retention	39954085	39953518	-	chr12:39918629-40016972C	c14881/f1p0/2700,c10540/f1p0/1568,c11114/f1p0/1724,c21424/f1p0/2813
chr12	Intron retention	39955030	39954780	-	chr12:39918629-40016972C	c14881/f1p0/2700,c11114/f1p0/1724
chr12	Exon skipping	39991339	39955030	-	chr12:39918629-40016972C	c10540/f1p0/1568,c11114/f1p0/1724
chr12	Intron retention	39991680	39991339	-	chr12:39918629-40016972C	c14881/f1p0/2700,c47220/f1p1/3762.1,c11114/f1p0/1724
chr12	Intron retention	40076062	40076162	+	chr12:40069691-40077312W	c47730/f1p1/3853,c28140/f1p2/2702,c43443/f1p0/3618.2,c58002/f1p2/3676,c58189/f3p3/3822,c63204/f6p3/3797
chr12	Alternative 3' splice site	4043927	4043926	-	chr12:4042455-4046357C	c11443/f1p0/1965,c5063/f2p0/1774,c8502/f1p0/1982
chr12	Alternative 5' splice site	4044189	4044188	-	chr12:4042455-4046357C	c1381/f2p3/1591,c5353/f1p0/1613,c557/f8p2/1784
chr12	Alternative 3' splice site	4045277	4045270	-	chr12:4042455-4046357C	c1381/f2p3/1591,c3791/f1p0/1830,c5063/f2p0/1774,c8502/f1p0/1982,c11443/f1p0/1965,c24077/f1p0/1767,c5353/f1p0/1613,c557/f8p2/1784,c9286/f1p0/1798
chr12	Intron retention	40662274	40662361	+	chr12:40661050-40665203W	c8140/f1p0/2126,c15194/f1p0/2199,c1947/f2p3/1743,c5749/f1p3/1607
chr12	Intron retention	40662978	40663070	+	chr12:40661050-40665203W	c15194/f1p0/2199,c1947/f2p3/1743,c5749/f1p3/1607
chr12	Alternative 5' splice site	40662978	40663175	+	chr12:40661050-40665203W	c8140/f1p0/2126,c15194/f1p0/2199
chr12	Exon skipping	40663070	40663175	+	chr12:40661050-40665203W	c8140/f1p0/2126,c1947/f2p3/1743,c5749/f1p3/1607
chr12	Alternative 5' splice site	40663460	40663464	+	chr12:40661050-40665203W	c1947/f2p3/1743,c5749/f1p3/1607,c8140/f1p0/2126,c15194/f1p0/2199
chr12	Intron retention	40664046	40664319	+	chr12:40661050-40665203W	c8140/f1p0/2126,c1947/f2p3/1743,c5749/f1p3/1607
chr12	Intron retention	40664046	40664594	+	chr12:40661050-40665203W	c15194/f1p0/2199,c1947/f2p3/1743,c5749/f1p3/1607
chr12	Intron retention	40664368	40664594	+	chr12:40661050-40665203W	c15194/f1p0/2199,c8140/f1p0/2126
chr12	Alternative 3' splice site	41057724	41057689	-	chr12:41053099-41059157C	c47925/f1p0/4111,c14943/f1p0/3029
chr12	Intron retention	41057989	41057887	-	chr12:41053099-41059157C	c47925/f1p0/4111,c14943/f1p0/3029
chr12	Intron retention	41143038	41143135	+	chr12:41141816-41148380W	c13969/f5p0/2810,c20904/f1p0/2881,c15657/f1p1/2790,c19190/f1p0/3452,c24023/f5p0/2672,c29024/f1p1/2939,c30824/f2p0/3001,c30893/f1p1/2968,c33572/f1p0/2774.1,c36023/f1p0/2970,c45479/f1p0/2826,c46061/f1p0/2955.1
chr12	Intron retention	41143596	41143957	+	chr12:41141816-41148380W	c19190/f1p0/3452,c13969/f5p0/2810,c15657/f1p1/2790,c20283/f1p1/2153,c20904/f1p0/2881,c24023/f5p0/2672,c29024/f1p1/2939,c30824/f2p0/3001,c30893/f1p1/2968,c33572/f1p0/2774.1,c36023/f1p0/2970,c45479/f1p0/2826,c46061/f1p0/2955.1
chr12	Alternative 3' splice site	41144089	41144126	+	chr12:41141816-41148380W	c13969/f5p0/2810,c15657/f1p1/2790,c19190/f1p0/3452,c20283/f1p1/2153,c20904/f1p0/2881,c24023/f5p0/2672,c30824/f2p0/3001,c30893/f1p1/2968,c33572/f1p0/2774.1,c36023/f1p0/2970,c45479/f1p0/2826,c46061/f1p0/2955.1,c8482/f1p0/1904,c29024/f1p1/2939
chr12	Alternative 5' splice site	41144846	41144847	+	chr12:41141816-41148380W	c30824/f2p0/3001,c13969/f5p0/2810,c18596/f1p1/1827,c19190/f1p0/3452,c20283/f1p1/2153,c20904/f1p0/2881,c24023/f5p0/2672,c29024/f1p1/2939,c30893/f1p1/2968,c33572/f1p0/2774.1,c36023/f1p0/2970,c45479/f1p0/2826,c46061/f1p0/2955.1,c8482/f1p0/1904
chr12	Intron retention	41144846	41144929	+	chr12:41141816-41148380W	c15657/f1p1/2790,c30824/f2p0/3001
chr12	Intron retention	41144847	41144929	+	chr12:41141816-41148380W	c15657/f1p1/2790,c13969/f5p0/2810,c18596/f1p1/1827,c19190/f1p0/3452,c20283/f1p1/2153,c24023/f5p0/2672,c29024/f1p1/2939,c30893/f1p1/2968,c33572/f1p0/2774.1,c36023/f1p0/2970,c45479/f1p0/2826,c46061/f1p0/2955.1,c8482/f1p0/1904
chr12	Intron retention	41144993	41145077	+	chr12:41141816-41148380W	c20904/f1p0/2881,c13969/f5p0/2810,c18596/f1p1/1827,c19190/f1p0/3452,c20283/f1p1/2153,c24023/f5p0/2672,c30824/f2p0/3001,c33572/f1p0/2774.1,c45479/f1p0/2826,c46061/f1p0/2955.1,c8482/f1p0/1904
chr12	Intron retention	41145153	41145405	+	chr12:41141816-41148380W	c29024/f1p1/2939,c30893/f1p1/2968,c36023/f1p0/2970,c13969/f5p0/2810,c18596/f1p1/1827
chr12	Intron retention	41145153	41145410	+	chr12:41141816-41148380W	c29024/f1p1/2939,c30893/f1p1/2968,c36023/f1p0/2970,c15657/f1p1/2790,c19190/f1p0/3452,c20283/f1p1/2153,c24023/f5p0/2672,c33572/f1p0/2774.1,c45479/f1p0/2826,c46061/f1p0/2955.1
chr12	Intron retention	41145153	41145416	+	chr12:41141816-41148380W	c29024/f1p1/2939,c30893/f1p1/2968,c36023/f1p0/2970,c8482/f1p0/1904
chr12	Alternative 3' splice site	41145405	41145410	+	chr12:41141816-41148380W	c13969/f5p0/2810,c18596/f1p1/1827,c15657/f1p1/2790,c19190/f1p0/3452,c20283/f1p1/2153,c24023/f5p0/2672,c33572/f1p0/2774.1,c45479/f1p0/2826,c46061/f1p0/2955.1
chr12	Alternative 3' splice site	41145405	41145409	+	chr12:41141816-41148380W	c13969/f5p0/2810,c18596/f1p1/1827,c20904/f1p0/2881
chr12	Alternative 3' splice site	41145405	41145416	+	chr12:41141816-41148380W	c13969/f5p0/2810,c18596/f1p1/1827,c8482/f1p0/1904
chr12	Alternative 3' splice site	41145409	41145410	+	chr12:41141816-41148380W	c20904/f1p0/2881,c15657/f1p1/2790,c19190/f1p0/3452,c20283/f1p1/2153,c24023/f5p0/2672,c33572/f1p0/2774.1,c45479/f1p0/2826,c46061/f1p0/2955.1
chr12	Alternative 3' splice site	41145409	41145416	+	chr12:41141816-41148380W	c20904/f1p0/2881,c8482/f1p0/1904
chr12	Alternative 3' splice site	41145410	41145416	+	chr12:41141816-41148380W	c15657/f1p1/2790,c19190/f1p0/3452,c20283/f1p1/2153,c24023/f5p0/2672,c33572/f1p0/2774.1,c45479/f1p0/2826,c46061/f1p0/2955.1,c8482/f1p0/1904
chr12	Intron retention	41146558	41146948	+	chr12:41141816-41148380W	c19190/f1p0/3452,c13969/f5p0/2810,c15657/f1p1/2790,c18596/f1p1/1827,c20283/f1p1/2153,c20904/f1p0/2881,c24023/f5p0/2672,c29024/f1p1/2939,c30824/f2p0/3001,c30893/f1p1/2968,c33572/f1p0/2774.1,c36023/f1p0/2970,c46061/f1p0/2955.1,c8482/f1p0/1904
chr12	Intron retention	41147049	41147183	+	chr12:41141816-41148380W	c45479/f1p0/2826,c13969/f5p0/2810,c15657/f1p1/2790,c18596/f1p1/1827,c20283/f1p1/2153,c20904/f1p0/2881,c24023/f5p0/2672,c29024/f1p1/2939,c30824/f2p0/3001,c30893/f1p1/2968,c33572/f1p0/2774.1,c36023/f1p0/2970,c46061/f1p0/2955.1,c8482/f1p0/1904
chr12	Alternative 3' splice site	41251189	41251188	-	chr12:41247677-41252822C	c34793/f1p0/3071.1,c35467/f1p0/2991,c35547/f2p0/2912
chr12	Alternative 3' splice site	41323861	41323860	-	chr12:41319426-41356541C	c15181/f1p1/3377,c52929/f1p0/3893,c55129/f1p0/3692,c60593/f1p0/3564,c61747/f1p0/3689,c53417/f1p1/3716
chr12	Intron retention	41333191	41332657	-	chr12:41319426-41356541C	c52929/f1p0/3893,c15181/f1p1/3377,c53417/f1p1/3716,c53594/f1p0/4036.2,c55129/f1p0/3692,c60593/f1p0/3564
chr12	Mutually exclusive exon	41334125	41334049	-	chr12:41319426-41356541C	c52929/f1p0/3893,c53417/f1p1/3716,c53594/f1p0/4036.2,c55129/f1p0/3692,c60593/f1p0/3564,c15181/f1p1/3377
chr12	Alternative 3' splice site	41435400	41435419	+	chr12:41434273-41437585W	c23130/f1p0/2036,c10698/f1p0/2098
chr12	Alternative 3' splice site	41459530	41460009	+	chr12:41458284-41466856W	c29781/f1p1/3239,c61808/f1p2/3371,c13589/f5p8/2999,c16393/f3p6/2996,c23973/f6p2/2941,c25578/f1p0/3028.2,c28211/f1p1/2857,c29821/f1p0/3003.2,c36036/f1p1/2872,c39631/f1p3/2873,c46317/f1p0/3093,c47071/f2p1/2912,c55387/f1p1/3509.2,c58075/f2p1/2862,c58761/f3p2/3001,c63418/f4p2/2874
chr12	Intron retention	41461691	41461967	+	chr12:41458284-41466856W	c55387/f1p1/3509.1,c13589/f5p8/2999,c16393/f3p6/2996,c23973/f6p2/2941,c25578/f1p0/3028.2,c28211/f1p1/2857,c29781/f1p1/3239,c29821/f1p0/3003.1,c36036/f1p1/2872,c39631/f1p3/2873,c40205/f1p0/3166.1,c46317/f1p0/3093,c47071/f2p1/2912,c58075/f2p1/2862,c58761/f3p2/3001,c61808/f1p2/3371,c63418/f4p2/2874
chr12	Intron retention	41464628	41464736	+	chr12:41458284-41466856W	c28211/f1p1/2857,c13589/f5p8/2999
chr12	Intron retention	41464628	41464755	+	chr12:41458284-41466856W	c28211/f1p1/2857,c36036/f1p1/2872,c46317/f1p0/3093
chr12	Alternative 3' splice site	41464736	41464755	+	chr12:41458284-41466856W	c13589/f5p8/2999,c16393/f3p6/2996,c29821/f1p0/3003.1,c40205/f1p0/3166.1,c58075/f2p1/2862,c58761/f3p2/3001,c61808/f1p2/3371,c63418/f4p2/2874,c23973/f6p2/2941,c29781/f1p1/3239,c36036/f1p1/2872,c39631/f1p3/2873,c46317/f1p0/3093,c47071/f2p1/2912,c55387/f1p1/3509.1
chr12	Intron retention	420124	420041	-	chr12:415121-423912C	c54302/f1p0/3669,c20935/f1p2/2984,c28190/f1p1/3092,c36311/f1p1/3106,c36673/f1p0/3238,c47125/f1p1/3076,c50632/f1p0/3428.1
chr12	Alternative 3' splice site	420799	420659	-	chr12:415121-423912C	c28190/f1p1/3092,c20935/f1p2/2984,c36311/f1p1/3106,c47125/f1p1/3076,c50632/f1p0/3428.1,c54302/f1p0/3669
chr12	Intron retention	420862	420659	-	chr12:415121-423912C	c36673/f1p0/3238,c20935/f1p2/2984,c36311/f1p1/3106,c47125/f1p1/3076,c50632/f1p0/3428.1,c54302/f1p0/3669
chr12	Intron retention	420862	420799	-	chr12:415121-423912C	c36673/f1p0/3238,c28190/f1p1/3092
chr12	Intron retention	421459	421200	-	chr12:415121-423912C	c54302/f1p0/3669,c20935/f1p2/2984,c28190/f1p1/3092,c36311/f1p1/3106,c36673/f1p0/3238,c47125/f1p1/3076
chr12	Alternative 5' splice site	423592	423581	-	chr12:415121-423912C	c54302/f1p0/3669,c20935/f1p2/2984
chr12	Intron retention	41543507	41543664	+	chr12:41539054-41698446W	c55412/f1p0/3730,c14876/f1p3/3387,c16547/f1p0/2295,c17767/f1p0/3169,c23147/f1p0/2778,c23504/f2p6/3242,c27422/f2p1/2966,c28157/f1p2/2949,c33367/f1p6/2975,c33508/f1p0/3942.1,c34079/f2p2/3437,c44339/f1p2/3986,c45366/f1p3/3452,c45810/f1p0/2835,c46684/f1p0/3696,c50302/f1p2/3376,c53481/f1p3/3622,c53885/f1p2/3722,c54171/f1p1/3511.1,c55756/f1p0/3993,c59566/f1p4/3685,c60378/f3p8/3490,c63089/f1p1/3280,c711…
chr12	Intron retention	41543907	41544152	+	chr12:41539054-41698446W	c46684/f1p0/3696,c55756/f1p0/3993,c23504/f2p6/3242,c27422/f2p1/2966,c44339/f1p2/3986,c45810/f1p0/2835,c53481/f1p3/3622,c53885/f1p2/3722,c59566/f1p4/3685,c60378/f3p8/3490
chr12	Intron retention	41545256	41545536	+	chr12:41539054-41698446W	c53481/f1p3/3622,c23504/f2p6/3242,c27422/f2p1/2966,c44339/f1p2/3986,c45810/f1p0/2835,c46684/f1p0/3696,c53885/f1p2/3722,c55756/f1p0/3993,c59566/f1p4/3685,c60378/f3p8/3490
chr12	Intron retention	41546246	41546537	+	chr12:41539054-41698446W	c53885/f1p2/3722,c55756/f1p0/3993,c59566/f1p4/3685,c23504/f2p6/3242,c27422/f2p1/2966,c44339/f1p2/3986,c45810/f1p0/2835,c46684/f1p0/3696,c53481/f1p3/3622,c60378/f3p8/3490
chr12	Intron retention	41551020	41551426	+	chr12:41539054-41698446W	c32342/f1p0/2964,c29693/f1p0/2778
chr12	Intron retention	41693294	41693377	+	chr12:41539054-41698446W	c51971/f1p0/3909,c18984/f1p0/2907,c26253/f6p2/3314,c60761/f1p0/3713
chr12	Exon skipping	41696327	41696585	+	chr12:41539054-41698446W	c17767/f1p0/3169,c11824/f1p2/2231,c14876/f1p3/3387,c16547/f1p0/2295,c23147/f1p0/2778,c28157/f1p2/2949,c33367/f1p6/2975,c33508/f1p0/3942.1,c34079/f2p2/3437,c45366/f1p3/3452,c50302/f1p2/3376,c54171/f1p1/3511.1,c55412/f1p0/3730,c63089/f1p1/3280,c7114/f1p1/1636
chr12	Intron retention	41697562	41697882	+	chr12:41539054-41698446W	c18984/f1p0/2907,c51971/f1p0/3909,c45366/f1p3/3452
chr12	Intron retention	41697591	41697882	+	chr12:41539054-41698446W	c18984/f1p0/2907,c51971/f1p0/3909,c11824/f1p2/2231,c16547/f1p0/2295,c17767/f1p0/3169,c23147/f1p0/2778,c28157/f1p2/2949,c33367/f1p6/2975,c33508/f1p0/3942.1,c34079/f2p2/3437,c50302/f1p2/3376,c55412/f1p0/3730,c63089/f1p1/3280,c7114/f1p1/1636
chr12	Intron retention	41697983	41698057	+	chr12:41539054-41698446W	c60761/f1p0/3713,c18984/f1p0/2907
chr12	Alternative 3' splice site	41698041	41698057	+	chr12:41539054-41698446W	c50302/f1p2/3376,c17767/f1p0/3169
chr12	Intron retention	41876724	41876779	+	chr12:41875346-41879849W	c39097/f1p0/2888,c35975/f1p0/2851.1
chr12	Intron retention	41877858	41878813	+	chr12:41875346-41879849W	c39097/f1p0/2888,c35975/f1p0/2851.1
chr12	Alternative 3' splice site	42930398	42930383	-	chr12:42930049-43199034C	c1171/f3p2/1717,c470/f5p2/1702,c8550/f3p2/1752
chr12	Intron retention	42932316	42930383	-	chr12:42930049-43199034C	c47176/f1p0/3718,c8917/f1p1/1732
chr12	Intron retention	4322651	4322381	-	chr12:4318899-4342096C	c32241/f1p0/2837,c19447/f1p0/3062.1,c2171/f2p0/2073
chr12	Alternative 3' splice site	4339733	4339730	-	chr12:4318899-4342096C	c22258/f1p1/2827,c30186/f1p0/2522,c5309/f1p1/2360,c31930/f1p1/3010
chr12	Alternative 3' splice site	4340348	4340316	-	chr12:4318899-4342096C	c30186/f1p0/2522,c5309/f1p1/2360,c22258/f1p1/2827
chr12	Intron retention	4340449	4340316	-	chr12:4318899-4342096C	c31930/f1p1/3010,c22258/f1p1/2827
chr12	Intron retention	4340449	4340348	-	chr12:4318899-4342096C	c31930/f1p1/3010,c30186/f1p0/2522,c5309/f1p1/2360
chr12	Exon skipping	43260736	43260790	+	chr12:43260099-43291327W	c17433/f1p1/3511,c24639/f1p0/2873.1,c26935/f3p6/2932,c28649/f1p0/2898,c29043/f1p0/3031,c33537/f1p1/3110,c35211/f1p0/2797,c36742/f1p1/2873,c37134/f3p2/2934,c50408/f1p0/3906.1,c30160/f1p3/2786
chr12	Alternative 3' splice site	43261258	43261292	+	chr12:43260099-43291327W	c17433/f1p1/3511,c24639/f1p0/2873.1,c26935/f3p6/2932,c28649/f1p0/2898,c29043/f1p0/3031,c33537/f1p1/3110,c35211/f1p0/2797,c36742/f1p1/2873,c37134/f3p2/2934,c50408/f1p0/3906.1,c16465/f1p0/3173.1,c28459/f1p1/2756,c31364/f1p0/2640
chr12	Intron retention	43263825	43263909	+	chr12:43260099-43291327W	c28649/f1p0/2898,c50408/f1p0/3906.1,c16465/f1p0/3173.1,c17433/f1p1/3511,c24639/f1p0/2873.1,c26935/f3p6/2932,c28459/f1p1/2756,c29043/f1p0/3031,c30160/f1p3/2786,c31364/f1p0/2640,c33537/f1p1/3110,c35211/f1p0/2797,c36471/f1p5/2928,c36742/f1p1/2873,c37134/f3p2/2934,c46768/f1p0/2939
chr12	Intron retention	43346197	43345954	-	chr12:43341624-43348212C	c25344/f1p0/3366,c14645/f2p1/2123,c1470/f4p1/2312,c20434/f1p0/2244,c21187/f1p1/2017
chr12	Intron retention	43486105	43486258	+	chr12:43439342-43616810W	c17708/f1p0/3221,c26657/f2p1/3216,c36120/f1p2/3336,c22908/f6p1/3053,c31341/f1p0/3100,c40663/f1p0/3054,c41078/f1p0/3204
chr12	Intron retention	43486105	43486182	+	chr12:43439342-43616810W	c17708/f1p0/3221,c26657/f2p1/3216,c36120/f1p2/3336,c33461/f1p0/3584
chr12	Alternative 3' splice site	43486182	43486258	+	chr12:43439342-43616810W	c33461/f1p0/3584,c22908/f6p1/3053,c31341/f1p0/3100,c40663/f1p0/3054,c41078/f1p0/3204
chr12	Mutually exclusive exon	43478924	43483019	+	chr12:43476184-43488095W	c34725/f1p1/3112,c26840/f2p0/3187
chr12	Alternative 3' splice site	43486182	43486258	+	chr12:43476184-43488095W	c26840/f2p0/3187,c34725/f1p1/3112
chr12	Intron retention	43508298	43508815	+	chr12:43507384-43513502W	c22428/f1p1/3267,c33055/f2p0/2812,c7774/f1p0/2186
chr12	Intron retention	43511012	43511705	+	chr12:43507384-43513502W	c22428/f1p1/3267,c7774/f1p0/2186
chr12	Intron retention	43511140	43511875	+	chr12:43507384-43513502W	c33055/f2p0/2812,c7774/f1p0/2186
chr12	Intron retention	43508454	43508815	+	chr12:43507385-43513503W	c51483/f1p0/3989.2,c10780/f1p0/5448.1,c35216/f1p0/2690,c45932/f1p1/2748
chr12	Intron retention	43511012	43511084	+	chr12:43507385-43513503W	c51483/f1p0/3989.1,c35216/f1p0/2690
chr12	Intron retention	43511012	43511875	+	chr12:43507385-43513503W	c51483/f1p0/3989.1,c10780/f1p0/5448.1
chr12	Intron retention	43511140	43511875	+	chr12:43507385-43513503W	c35216/f1p0/2690,c10780/f1p0/5448.1
chr12	Alternative 5' splice site	43511974	43511981	+	chr12:43507385-43513503W	c45932/f1p1/2748,c10780/f1p0/5448.1
chr12	Intron retention	43571983	43571900	-	chr12:43569159-43573793C	c30532/f1p0/2673,c15110/f1p1/2700,c31501/f1p3/2711,c36282/f4p2/2609
chr12	Intron retention	43572872	43572787	-	chr12:43569159-43573793C	c15040/f1p0/2909,c19687/f1p0/2699,c15110/f1p1/2700,c31501/f1p3/2711,c36282/f4p2/2609
chr12	Intron retention	43614711	43615051	+	chr12:43608579-43616758W	c30155/f1p0/3450,c39147/f1p0/2919
chr12	Intron retention	43615724	43615860	+	chr12:43608579-43616758W	c30155/f1p0/3450,c39147/f1p0/2919
chr12	Mutually exclusive exon	44632766	44653608	+	chr12:44632428-44703958W	c26575/f4p2/3205,c32946/f1p2/3074,c25449/f1p0/7624.2,c26599/f2p1/2883,c38169/f2p5/3100
chr12	Intron retention	44702124	44702325	+	chr12:44632428-44703958W	c38169/f2p5/3100,c26599/f2p1/2883
chr12	Intron retention	45853663	45853577	-	chr12:45851440-45857283C	c50201/f2p3/3779,c29729/f1p1/2966,c32294/f1p6/3433,c39183/f1p0/3662,c42424/f1p0/3549,c44368/f1p0/2709,c50234/f1p0/7486.2,c51180/f1p0/3642.1,c54270/f1p0/4638.1,c55916/f1p0/4046.1,c61984/f1p1/3820,c62176/f1p1/3414,c62722/f2p8/3874
chr12	Alternative 5' splice site	45853921	45853896	-	chr12:45851440-45857283C	c29729/f1p1/2966,c32294/f1p6/3433,c39183/f1p0/3662,c42424/f1p0/3549,c44368/f1p0/2709,c50201/f2p3/3779,c50234/f1p0/7486.2,c54270/f1p0/4638.1,c62176/f1p1/3414,c62722/f2p8/3874,c63294/f1p2/3809.1,c61984/f1p1/3820
chr12	Intron retention	46018228	46018319	+	chr12:46016681-46044437W	c8093/f1p0/1668,c3527/f1p0/1574
chr12	Alternative 3' splice site	46061715	46061694	-	chr12:46057657-46064981C	c31145/f1p0/3333,c32008/f1p0/3338
chr12	Intron retention	46061577	46060956	-	chr12:46057750-46064819C	c62690/f1p1/3632,c27793/f1p1/2985
chr12	Intron retention	47230653	47230202	-	chr12:47228632-47233123C	c39914/f1p1/2964,c4523/f1p2/1938,c4530/f1p1/2018,c5806/f1p1/1946,c9082/f1p0/1637
chr12	Alternative 5' splice site	47231465	47231461	-	chr12:47228632-47233123C	c4523/f1p2/1938,c4530/f1p1/2018,c5806/f1p1/1946,c9082/f1p0/1637,c39914/f1p1/2964
chr12	Intron retention	48106779	48106677	-	chr12:48103966-48111450C	c24376/f1p1/3342,c55732/f1p0/3903,c56071/f1p1/3643,c60946/f1p1/3906
chr12	Alternative 5' splice site	48106780	48106779	-	chr12:48103966-48111450C	c50946/f1p0/3941,c60938/f1p0/3787,c60946/f1p1/3906
chr12	Intron retention	48106780	48106677	-	chr12:48103966-48111450C	c24376/f1p1/3342,c55732/f1p0/3903,c56071/f1p1/3643,c50946/f1p0/3941,c60938/f1p0/3787
chr12	Alternative 5' splice site	48106786	48106780	-	chr12:48103966-48111450C	c53879/f1p0/3734,c50946/f1p0/3941,c60938/f1p0/3787
chr12	Alternative 5' splice site	48106786	48106779	-	chr12:48103966-48111450C	c53879/f1p0/3734,c60946/f1p1/3906
chr12	Intron retention	48106786	48106677	-	chr12:48103966-48111450C	c24376/f1p1/3342,c55732/f1p0/3903,c56071/f1p1/3643,c53879/f1p0/3734
chr12	Intron retention	48106970	48106677	-	chr12:48103966-48111450C	c39709/f1p0/3972,c59891/f1p1/3615,c50946/f1p0/3941,c60938/f1p0/3787
chr12	Intron retention	48106970	48106677	-	chr12:48103966-48111450C	c39709/f1p0/3972,c59891/f1p1/3615,c53879/f1p0/3734
chr12	Intron retention	48106970	48106677	-	chr12:48103966-48111450C	c39709/f1p0/3972,c59891/f1p1/3615,c60946/f1p1/3906
chr12	Intron retention	48106970	48106866	-	chr12:48103966-48111450C	c39709/f1p0/3972,c59891/f1p1/3615,c24376/f1p1/3342,c55732/f1p0/3903
chr12	Intron retention	48106970	48106866	-	chr12:48103966-48111450C	c44742/f1p1/3802,c61289/f1p0/3663,c56071/f1p1/3643
chr12	Exon skipping	48107079	48106780	-	chr12:48103966-48111450C	c14288/f11p4/3046,c15499/f1p0/3095,c18995/f1p0/2877,c26614/f3p5/3046,c32292/f1p0/3153,c45109/f1p0/3175,c53151/f1p0/4248.1,c54161/f1p0/3598,c62469/f1p1/4020,c50946/f1p0/3941,c60938/f1p0/3787
chr12	Exon skipping	48107079	48106786	-	chr12:48103966-48111450C	c14288/f11p4/3046,c15499/f1p0/3095,c18995/f1p0/2877,c26614/f3p5/3046,c32292/f1p0/3153,c45109/f1p0/3175,c53151/f1p0/4248.1,c54161/f1p0/3598,c62469/f1p1/4020,c53879/f1p0/3734
chr12	Exon skipping	48107079	48106779	-	chr12:48103966-48111450C	c14288/f11p4/3046,c15499/f1p0/3095,c18995/f1p0/2877,c26614/f3p5/3046,c32292/f1p0/3153,c45109/f1p0/3175,c53151/f1p0/4248.1,c54161/f1p0/3598,c62469/f1p1/4020,c60946/f1p1/3906
chr12	Alternative 3' splice site	48107079	48106677	-	chr12:48103966-48111450C	c39709/f1p0/3972,c59891/f1p1/3615,c14288/f11p4/3046,c15499/f1p0/3095,c18995/f1p0/2877,c26614/f3p5/3046,c32292/f1p0/3153,c45109/f1p0/3175,c53151/f1p0/4248.1,c54161/f1p0/3598,c62469/f1p1/4020
chr12	Intron retention	48107167	48107079	-	chr12:48103966-48111450C	c56071/f1p1/3643,c24376/f1p1/3342,c50946/f1p0/3941,c53879/f1p0/3734,c55732/f1p0/3903,c60938/f1p0/3787,c60946/f1p1/3906
chr12	Intron retention	48107167	48106677	-	chr12:48103966-48111450C	c44742/f1p1/3802,c61289/f1p0/3663,c14288/f11p4/3046,c15499/f1p0/3095,c18995/f1p0/2877,c26614/f3p5/3046,c32292/f1p0/3153,c45109/f1p0/3175,c53151/f1p0/4248.1,c54161/f1p0/3598,c62469/f1p1/4020
chr12	Intron retention	48107167	48107079	-	chr12:48103966-48111450C	c44742/f1p1/3802,c61289/f1p0/3663,c59891/f1p1/3615
chr12	Intron retention	48107167	48106677	-	chr12:48103966-48111450C	c44742/f1p1/3802,c61289/f1p0/3663,c50946/f1p0/3941,c60938/f1p0/3787
chr12	Intron retention	48107167	48106677	-	chr12:48103966-48111450C	c44742/f1p1/3802,c61289/f1p0/3663,c53879/f1p0/3734
chr12	Intron retention	48107167	48106677	-	chr12:48103966-48111450C	c44742/f1p1/3802,c61289/f1p0/3663,c60946/f1p1/3906
chr12	Intron retention	48107167	48106866	-	chr12:48103966-48111450C	c44742/f1p1/3802,c61289/f1p0/3663,c24376/f1p1/3342,c55732/f1p0/3903
chr12	Intron retention	48107383	48107270	-	chr12:48103966-48111450C	c14288/f11p4/3046,c15499/f1p0/3095,c18995/f1p0/2877,c24376/f1p1/3342,c26614/f3p5/3046,c32292/f1p0/3153,c45109/f1p0/3175,c50946/f1p0/3941,c53151/f1p0/4248.1,c53879/f1p0/3734,c54161/f1p0/3598,c55732/f1p0/3903,c59891/f1p1/3615,c60938/f1p0/3787,c60946/f1p1/3906,c62469/f1p1/4020,c39709/f1p0/3972
chr12	Intron retention	48107383	48107079	-	chr12:48103966-48111450C	c44742/f1p1/3802,c61289/f1p0/3663,c39709/f1p0/3972
chr12	Intron retention	48108240	48108077	-	chr12:48103966-48111450C	c39709/f1p0/3972,c50946/f1p0/3941,c54161/f1p0/3598,c55732/f1p0/3903,c60938/f1p0/3787,c60946/f1p1/3906,c53879/f1p0/3734
chr12	Exon skipping	48108400	48108240	-	chr12:48103966-48111450C	c14288/f11p4/3046,c15499/f1p0/3095,c18995/f1p0/2877,c24376/f1p1/3342,c26614/f3p5/3046,c32292/f1p0/3153
chr12	Intron retention	48108479	48108400	-	chr12:48103966-48111450C	c53151/f1p0/4248.2,c44742/f1p1/3802,c45109/f1p0/3175,c56071/f1p1/3643,c59891/f1p1/3615,c61289/f1p0/3663
chr12	Exon skipping	48108559	48108479	-	chr12:48103966-48111450C	c32292/f1p0/3153,c44742/f1p1/3802,c45109/f1p0/3175,c56071/f1p1/3643,c59891/f1p1/3615,c61289/f1p0/3663
chr12	Alternative 3' splice site	48108559	48108400	-	chr12:48103966-48111450C	c53151/f1p0/4248.2,c32292/f1p0/3153
chr12	Exon skipping	48108559	48108240	-	chr12:48103966-48111450C	c14288/f11p4/3046,c15499/f1p0/3095,c18995/f1p0/2877,c24376/f1p1/3342,c26614/f3p5/3046,c44742/f1p1/3802,c45109/f1p0/3175,c56071/f1p1/3643,c59891/f1p1/3615,c61289/f1p0/3663
chr12	Exon skipping	48108559	48108240	-	chr12:48103966-48111450C	c14288/f11p4/3046,c15499/f1p0/3095,c18995/f1p0/2877,c24376/f1p1/3342,c26614/f3p5/3046,c53151/f1p0/4248.2
chr12	Intron retention	48108711	48108400	-	chr12:48103966-48111450C	c53879/f1p0/3734,c32292/f1p0/3153
chr12	Intron retention	48108711	48108400	-	chr12:48103966-48111450C	c53879/f1p0/3734,c44742/f1p1/3802,c45109/f1p0/3175,c56071/f1p1/3643,c59891/f1p1/3615,c61289/f1p0/3663
chr12	Intron retention	48108711	48108559	-	chr12:48103966-48111450C	c53879/f1p0/3734,c53151/f1p0/4248.2
chr12	Alternative 5' splice site	48108711	48108240	-	chr12:48103966-48111450C	c14288/f11p4/3046,c15499/f1p0/3095,c18995/f1p0/2877,c24376/f1p1/3342,c26614/f3p5/3046,c53879/f1p0/3734
chr12	Intron retention	48108711	48108077	-	chr12:48103966-48111450C	c39709/f1p0/3972,c50946/f1p0/3941,c54161/f1p0/3598,c55732/f1p0/3903,c60938/f1p0/3787,c60946/f1p1/3906,c14288/f11p4/3046,c15499/f1p0/3095,c18995/f1p0/2877,c24376/f1p1/3342,c26614/f3p5/3046
chr12	Intron retention	48108711	48108077	-	chr12:48103966-48111450C	c39709/f1p0/3972,c50946/f1p0/3941,c54161/f1p0/3598,c55732/f1p0/3903,c60938/f1p0/3787,c60946/f1p1/3906,c32292/f1p0/3153
chr12	Intron retention	48108711	48108077	-	chr12:48103966-48111450C	c39709/f1p0/3972,c50946/f1p0/3941,c54161/f1p0/3598,c55732/f1p0/3903,c60938/f1p0/3787,c60946/f1p1/3906,c44742/f1p1/3802,c45109/f1p0/3175,c56071/f1p1/3643,c59891/f1p1/3615,c61289/f1p0/3663
chr12	Intron retention	48108711	48108077	-	chr12:48103966-48111450C	c39709/f1p0/3972,c50946/f1p0/3941,c54161/f1p0/3598,c55732/f1p0/3903,c60938/f1p0/3787,c60946/f1p1/3906,c53151/f1p0/4248.2
chr12	Intron retention	48109181	48108077	-	chr12:48103966-48111450C	c62469/f1p1/4020,c53879/f1p0/3734
chr12	Intron retention	48109181	48108940	-	chr12:48103966-48111450C	c62469/f1p1/4020,c39709/f1p0/3972,c50946/f1p0/3941,c54161/f1p0/3598,c55732/f1p0/3903,c60938/f1p0/3787,c60946/f1p1/3906
chr12	Intron retention	48109181	48108077	-	chr12:48103966-48111450C	c62469/f1p1/4020,c14288/f11p4/3046,c15499/f1p0/3095,c18995/f1p0/2877,c24376/f1p1/3342,c26614/f3p5/3046
chr12	Intron retention	48109181	48108077	-	chr12:48103966-48111450C	c62469/f1p1/4020,c32292/f1p0/3153
chr12	Intron retention	48109181	48108077	-	chr12:48103966-48111450C	c62469/f1p1/4020,c44742/f1p1/3802,c45109/f1p0/3175,c56071/f1p1/3643,c59891/f1p1/3615,c61289/f1p0/3663
chr12	Intron retention	48109181	48108077	-	chr12:48103966-48111450C	c62469/f1p1/4020,c53151/f1p0/4248.2
chr12	Alternative 5' splice site	48223098	48223026	-	chr12:48220888-48224842C	c15383/f1p0/1683,c1724/f2p0/1781
chr12	Intron retention	49142053	49142109	+	chr12:49138766-49142581W	c3656/f1p1/2136,c9611/f1p0/2644
chr12	Intron retention	49315503	49314125	-	chr12:49313205-49318514C	c52733/f1p1/3905,c2050/f2p0/2027
chr12	Intron retention	49321613	49321535	-	chr12:49319933-49324074C	c4586/f1p0/1795,c2562/f2p0/1724
chr12	Alternative 3' splice site	49323568	49323551	-	chr12:49319933-49324074C	c4586/f1p0/1795,c2562/f2p0/1724
chr12	Alternative 3' splice site	49629136	49629151	+	chr12:49620487-49630474W	c56287/f1p4/4627,c12131/f1p2/1865,c27051/f1p6/2711,c49873/f2p6/3958,c52263/f1p9/3853
chr12	Alternative 5' splice site	49629854	49629855	+	chr12:49620487-49630474W	c12131/f1p2/1865,c49873/f2p6/3958,c27051/f1p6/2711,c52263/f1p9/3853,c56287/f1p4/4627
chr12	Intron retention	49660456	49660366	-	chr12:49659463-49662090C	c9876/f1p0/1970,c8438/f1p0/1771
chr12	Intron retention	49666643	49666817	+	chr12:49664646-49667658W	c47717/f1p0/2693.1,c7224/f3p0/1512
chr12	Alternative 5' splice site	49685448	49685554	+	chr12:49683135-49687298W	c1091/f4p2/1900,c51593/f1p1/3455
chr12	Intron retention	49685966	49686075	+	chr12:49683135-49687298W	c51593/f1p1/3455,c1091/f4p2/1900
chr12	Intron retention	50312075	50312627	+	chr12:50274804-50619963W	c27505/f1p1/3019,c11024/f1p0/1676
chr12	Intron retention	50526947	50526838	-	chr12:50525214-50529077C	c38037/f5p11/2733,c42818/f1p3/2533,c44289/f1p0/2770,c22957/f4p3/2508,c27317/f1p1/2366
chr12	Intron retention	50526947	50526838	-	chr12:50525214-50529077C	c29978/f1p1/2754,c38983/f1p1/2415,c44528/f1p0/2557
chr12	Intron retention	50528854	50528581	-	chr12:50525214-50529077C	c26292/f5p3/2992,c39363/f1p6/3788,c42818/f1p3/2533
chr12	Alternative 5' splice site	50528861	50528854	-	chr12:50525214-50529077C	c19241/f1p1/2267,c22957/f4p3/2508,c27317/f1p1/2366,c29425/f1p0/4084.1,c29978/f1p1/2754,c33152/f1p2/2632,c38037/f5p11/2733,c43312/f1p1/2606,c44528/f1p0/2557,c42818/f1p3/2533
chr12	Intron retention	50528861	50528581	-	chr12:50525214-50529077C	c24656/f1p1/2777,c19241/f1p1/2267,c22957/f4p3/2508,c27317/f1p1/2366,c33152/f1p2/2632,c44528/f1p0/2557
chr12	Intron retention	50528861	50528581	-	chr12:50525214-50529077C	c26292/f5p3/2992,c39363/f1p6/3788,c38037/f5p11/2733
chr12	Intron retention	50528861	50526838	-	chr12:50525214-50529077C	c26292/f5p3/2992,c39363/f1p6/3788,c22957/f4p3/2508,c27317/f1p1/2366
chr12	Intron retention	50620975	50621216	+	chr12:50618282-50623851W	c44183/f2p0/3693,c20787/f1p0/2974,c23145/f1p4/3239,c38581/f8p4/3437,c41947/f1p2/2729
chr12	Alternative 3' splice site	50839806	50840019	+	chr12:50839136-50843456W	c7189/f1p3/1914,c1325/f4p3/1698,c3564/f1p0/1972,c4502/f1p1/1657,c6337/f1p3/1659
chr12	Intron retention	50840122	50840223	+	chr12:50839136-50843456W	c3033/f1p2/1793,c9841/f1p0/1963,c1325/f4p3/1698,c3564/f1p0/1972,c4502/f1p1/1657,c6337/f1p3/1659
chr12	Alternative 3' splice site	50840927	50840937	+	chr12:50839136-50843456W	c4502/f1p1/1657,c1325/f4p3/1698,c3033/f1p2/1793,c3564/f1p0/1972,c6337/f1p3/1659,c7189/f1p3/1914,c9841/f1p0/1963
chr12	Intron retention	51164690	51164535	-	chr12:51163633-51167486C	c12323/f1p0/1733,c5770/f1p0/1550
chr12	Alternative 3' splice site	51165952	51165864	-	chr12:51163633-51167486C	c31892/f1p0/2834.2,c12323/f1p0/1733
chr12	Alternative 3' splice site	51251833	51251834	+	chr12:51249068-51361553W	c36091/f2p3/3001,c39401/f1p4/4057,c40780/f1p4/3225,c54659/f1p0/3239,c57523/f2p4/3755,c60891/f1p7/3954,c18858/f1p2/2855
chr12	Intron retention	51592876	51592783	-	chr12:51519385-51986078C	c43151/f1p0/4188,c55890/f1p0/3764,c57208/f1p0/4086,c51849/f1p1/4193
chr12	Intron retention	51935129	51934882	-	chr12:51932261-51953221C	c31882/f1p0/3037,c14048/f7p5/2812,c17543/f1p3/2666,c20834/f5p3/2840,c26113/f14p6/2847,c28825/f1p0/2834,c31451/f1p3/2677,c44155/f1p3/2965,c47630/f1p0/3082.1,c48437/f1p3/2730
chr12	Intron retention	51952189	51952094	-	chr12:51932261-51953221C	c44155/f1p3/2965,c14048/f7p5/2812,c17543/f1p3/2666,c20834/f5p3/2840,c26113/f14p6/2847,c28825/f1p0/2834,c31451/f1p3/2677,c31882/f1p0/3037,c47630/f1p0/3082.1,c48437/f1p3/2730
chr12	Intron retention	51989785	51989611	-	chr12:51987413-51992948C	c53961/f1p0/3751,c46691/f1p0/3775,c51607/f1p1/3825
chr12	Intron retention	51990735	51990617	-	chr12:51987413-51992948C	c46691/f1p0/3775,c51607/f1p1/3825,c53961/f1p0/3751
chr12	Intron retention	52023282	52024279	+	chr12:52022112-52027133W	c32304/f1p0/24082.1,c20153/f1p0/1998,c3284/f1p0/1874
chr12	Alternative 3' splice site	52024494	52024497	+	chr12:52022112-52027133W	c3284/f1p0/1874,c20153/f1p0/1998,c32304/f1p0/24082.1
chr12	Alternative 3' splice site	52038556	52038585	+	chr12:52037959-52160571W	c49415/f3p2/3853,c61744/f1p2/4040
chr12	Alternative 5' splice site	52039170	52039174	+	chr12:52037959-52160571W	c61744/f1p2/4040,c49415/f3p2/3853
chr12	Intron retention	52247191	52247287	+	chr12:52246092-52250479W	c22536/f2p0/3088,c33981/f1p0/2819
chr12	Intron retention	52247683	52247979	+	chr12:52246092-52250479W	c22536/f2p0/3088,c18591/f1p0/2849
chr12	Intron retention	52247683	52248088	+	chr12:52246092-52250479W	c22536/f2p0/3088,c44384/f1p0/2721
chr12	Alternative 3' splice site	52247979	52248088	+	chr12:52246092-52250479W	c18591/f1p0/2849,c3027/f1p0/1968,c44384/f1p0/2721
chr12	Alternative 3' splice site	52556752	52556749	-	chr12:52553592-52557599C	c18564/f1p2/1916,c6258/f1p0/2122,c1016/f5p2/1868,c15977/f1p2/1894,c6336/f1p2/1928,c6810/f1p0/2083.1
chr12	Alternative 3' splice site	52588065	52588064	-	chr12:52574257-52590523C	c51555/f1p0/4138,c57233/f1p4/4005,c38436/f2p5/4256
chr12	Alternative 3' splice site	52588069	52588064	-	chr12:52574257-52590523C	c44298/f1p4/3968,c38436/f2p5/4256
chr12	Alternative 3' splice site	52588069	52588065	-	chr12:52574257-52590523C	c44298/f1p4/3968,c51555/f1p0/4138,c57233/f1p4/4005
chr12	Alternative 3' splice site	52588855	52588774	-	chr12:52574257-52590523C	c38436/f2p5/4256,c44298/f1p4/3968,c51555/f1p0/4138
chr12	Alternative 3' splice site	52621113	52621227	+	chr12:52614562-52623551W	c59193/f1p0/3657,c28355/f1p1/3390,c45261/f1p0/3522,c50334/f1p0/3834.1,c59632/f1p0/3669,c60675/f1p0/3552
chr12	Intron retention	541431	541321	-	chr12:539183-543921C	c44124/f1p1/3748,c19746/f1p0/2925,c32831/f1p5/3479,c52975/f1p1/3511,c54613/f1p2/3828,c57217/f1p0/5044.2,c59705/f1p3/3520,c60325/f1p1/3870,c61499/f1p0/3925.1,c61733/f1p3/3783,c62298/f1p2/3862,c62612/f1p5/3647
chr12	Intron retention	542409	542260	-	chr12:539183-543921C	c44124/f1p1/3748,c61733/f1p3/3783,c19746/f1p0/2925,c32831/f1p5/3479,c52975/f1p1/3511,c54613/f1p2/3828,c59705/f1p3/3520,c60325/f1p1/3870,c61499/f1p0/3925.1,c62298/f1p2/3862,c62612/f1p5/3647
chr12	Intron retention	5473822	5472283	-	chr12:5464353-5477230C	c50293/f1p0/3637,c3327/f1p0/2171
chr12	Alternative 3' splice site	5474787	5474752	-	chr12:5464353-5477230C	c3327/f1p0/2171,c50293/f1p0/3637
chr12	Intron retention	5956746	5956834	+	chr12:5956139-5958866W	c22407/f1p2/1832,c1306/f6p2/1876,c18170/f1p2/2036.1
chr12	Alternative 3' splice site	5957202	5957209	+	chr12:5956139-5958866W	c22407/f1p2/1832,c1306/f6p2/1876,c18170/f1p2/2036.1
chr12	Alternative 3' splice site	6247183	6247180	-	chr12:6246534-6251776C	c62135/f1p1/3734,c20317/f1p1/2686
chr12	Intron retention	6248590	6248499	-	chr12:6246534-6251776C	c28319/f1p2/2701,c20317/f1p1/2686,c44178/f1p2/2615,c62135/f1p1/3734
chr12	Alternative 5' splice site	6248633	6248590	-	chr12:6246534-6251776C	c19238/f1p3/2545,c20317/f1p1/2686,c44178/f1p2/2615,c62135/f1p1/3734
chr12	Intron retention	6248633	6248499	-	chr12:6246534-6251776C	c28319/f1p2/2701,c19238/f1p3/2545
chr12	Alternative 3' splice site	6250178	6250162	-	chr12:6246534-6251776C	c28319/f1p2/2701,c44178/f1p2/2615,c19238/f1p3/2545,c20317/f1p1/2686
chr12	Intron retention	6598900	6598805	-	chr12:6597838-6603095C	c18236/f1p1/2432,c33933/f1p1/3365,c10896/f1p0/2754.2,c20599/f1p2/2174,c30044/f2p0/3171
chr12	Intron retention	6600508	6599870	-	chr12:6597838-6603095C	c30044/f2p0/3171,c33933/f1p1/3365
chr12	Exon skipping	6601362	6601247	-	chr12:6597838-6603095C	c20599/f1p2/2174,c18236/f1p1/2432
chr12	Intron retention	6601699	6600606	-	chr12:6597838-6603095C	c33933/f1p1/3365,c18236/f1p1/2432
chr12	Intron retention	6601699	6600606	-	chr12:6597838-6603095C	c33933/f1p1/3365,c20599/f1p2/2174
chr12	Intron retention	6601699	6599870	-	chr12:6597838-6603095C	c30044/f2p0/3171,c18236/f1p1/2432
chr12	Intron retention	6601699	6599870	-	chr12:6597838-6603095C	c30044/f2p0/3171,c20599/f1p2/2174
chr12	Intron retention	6601983	6601753	-	chr12:6597838-6603095C	c50226/f1p1/4075,c33933/f1p1/3365
chr12	Intron retention	6601983	6600606	-	chr12:6597838-6603095C	c50226/f1p1/4075,c18236/f1p1/2432
chr12	Intron retention	6601983	6600606	-	chr12:6597838-6603095C	c50226/f1p1/4075,c20599/f1p2/2174
chr12	Intron retention	6602876	6602153	-	chr12:6597838-6603095C	c18236/f1p1/2432,c20599/f1p2/2174,c33933/f1p1/3365,c30044/f2p0/3171
chr12	Intron retention	676070	675939	-	chr12:675371-678355C	c18382/f1p0/2118.1,c11773/f1p0/1706
chr12	Intron retention	677026	676920	-	chr12:675371-678355C	c18382/f1p0/2118.1,c11773/f1p0/1706
chr12	Exon skipping	6870909	6871694	+	chr12:6865590-7647131W	c43537/f1p0/2998,c42413/f1p0/2623
chr12	Intron retention	6873310	6873388	+	chr12:6865590-7647131W	c42413/f1p0/2623,c45416/f1p0/3859.1,c43537/f1p0/2998
chr12	Intron retention	6899837	6899746	-	chr12:6887155-6941424C	c46735/f1p0/2900,c16995/f1p0/2987
chr12	Mutually exclusive exon	6973884	6962701	-	chr12:6960620-6974618C	c10020/f2p0/1650,c10361/f1p0/1514
chr12	Alternative 5' splice site	7475876	7475888	+	chr12:7474453-7522799W	c38144/f2p3/3734,c39382/f1p2/3717,c45146/f1p0/3983,c46875/f3p5/3930,c49427/f3p6/3882,c50681/f1p0/3518,c51730/f1p0/3768,c53834/f1p1/3931,c56031/f1p1/3724,c56190/f1p0/3682,c56196/f1p0/4044,c57427/f1p0/3746,c57964/f1p1/4032,c59478/f1p1/3955.2,c59509/f1p1/3918,c61518/f1p1/3865,c61615/f3p1/3695,c63152/f2p6/3912,c64092/f4p2/3886,c64142/f5p4/3901,c45950/f1p3/3826
chr12	Intron retention	7477171	7477273	+	chr12:7474453-7522799W	c45146/f1p0/3983,c38144/f2p3/3734,c39382/f1p2/3717,c45950/f1p3/3826,c46875/f3p5/3930,c49427/f3p6/3882,c50681/f1p0/3518,c51730/f1p0/3768,c53834/f1p1/3931,c56031/f1p1/3724,c56190/f1p0/3682,c56196/f1p0/4044,c57427/f1p0/3746,c57964/f1p1/4032,c59478/f1p1/3955.2,c59509/f1p1/3918,c61518/f1p1/3865,c61615/f3p1/3695,c63152/f2p6/3912,c64092/f4p2/3886,c64142/f5p4/3901
chr12	Alternative 3' splice site	7477575	7477606	+	chr12:7474453-7522799W	c38144/f2p3/3734,c39382/f1p2/3717,c42806/f1p0/3137,c45950/f1p3/3826,c46875/f3p5/3930,c47413/f1p0/3078,c49427/f3p6/3882,c50681/f1p0/3518,c51730/f1p0/3768,c53834/f1p1/3931,c56031/f1p1/3724,c56190/f1p0/3682,c56196/f1p0/4044,c57427/f1p0/3746,c57964/f1p1/4032,c59478/f1p1/3955.2,c59509/f1p1/3918,c61615/f3p1/3695,c63152/f2p6/3912,c64092/f4p2/3886,c64142/f5p4/3901,c45146/f1p0/3983,c61518/f1p1/3865
chr12	Intron retention	7479798	7479934	+	chr12:7474453-7522799W	c18859/f1p1/2933,c31827/f1p0/2966,c38144/f2p3/3734,c39382/f1p2/3717,c42806/f1p0/3137,c45146/f1p0/3983,c45950/f1p3/3826,c46875/f3p5/3930,c47413/f1p0/3078,c49427/f3p6/3882,c50681/f1p0/3518,c51730/f1p0/3768,c56031/f1p1/3724,c56190/f1p0/3682,c56196/f1p0/4044,c57964/f1p1/4032,c59478/f1p1/3955.1,c61518/f1p1/3865,c61615/f3p1/3695,c63152/f2p6/3912,c64092/f4p2/3886,c64142/f5p4/3901,c57427/f1p0/3746
chr12	Intron retention	7479798	7480236	+	chr12:7474453-7522799W	c53834/f1p1/3931,c59509/f1p1/3918,c57427/f1p0/3746
chr12	Intron retention	7480175	7480236	+	chr12:7474453-7522799W	c53834/f1p1/3931,c59509/f1p1/3918,c18859/f1p1/2933,c31827/f1p0/2966,c38144/f2p3/3734,c39382/f1p2/3717,c42806/f1p0/3137,c45146/f1p0/3983,c45950/f1p3/3826,c46875/f3p5/3930,c47413/f1p0/3078,c49427/f3p6/3882,c50681/f1p0/3518,c51730/f1p0/3768,c56031/f1p1/3724,c56190/f1p0/3682,c56196/f1p0/4044,c57964/f1p1/4032,c59478/f1p1/3955.1,c61518/f1p1/3865,c61615/f3p1/3695,c63152/f2p6/3912,c64092/f4p2/3886,c64142…
chr12	Intron retention	7480703	7480785	+	chr12:7474453-7522799W	c59509/f1p1/3918,c18859/f1p1/2933,c31827/f1p0/2966,c38144/f2p3/3734,c39382/f1p2/3717,c42806/f1p0/3137,c45146/f1p0/3983,c45950/f1p3/3826,c46875/f3p5/3930,c47413/f1p0/3078,c49427/f3p6/3882,c50681/f1p0/3518,c51730/f1p0/3768,c53834/f1p1/3931,c56031/f1p1/3724,c56190/f1p0/3682,c56196/f1p0/4044,c57427/f1p0/3746,c57964/f1p1/4032,c59478/f1p1/3955.1,c61518/f1p1/3865,c61615/f3p1/3695,c63152/f2p6/3912,c64092…
chr12	Exon skipping	7481518	7481697	+	chr12:7474453-7522799W	c56190/f1p0/3682,c18859/f1p1/2933,c31827/f1p0/2966,c38144/f2p3/3734,c39382/f1p2/3717,c42806/f1p0/3137,c45146/f1p0/3983,c45950/f1p3/3826,c46875/f3p5/3930,c47413/f1p0/3078,c49427/f3p6/3882,c50681/f1p0/3518,c51730/f1p0/3768,c53834/f1p1/3931,c56031/f1p1/3724,c56196/f1p0/4044,c57427/f1p0/3746,c57964/f1p1/4032,c59478/f1p1/3955.1,c59509/f1p1/3918,c61518/f1p1/3865,c61615/f3p1/3695,c63152/f2p6/3912,c64092…
chr12	Intron retention	7482265	7482368	+	chr12:7474453-7522799W	c56196/f1p0/4044,c18859/f1p1/2933,c31827/f1p0/2966,c38144/f2p3/3734,c39382/f1p2/3717,c42806/f1p0/3137,c45146/f1p0/3983,c45950/f1p3/3826,c46875/f3p5/3930,c47413/f1p0/3078,c49427/f3p6/3882,c50681/f1p0/3518,c51730/f1p0/3768,c53834/f1p1/3931,c56031/f1p1/3724,c56190/f1p0/3682,c57427/f1p0/3746,c57964/f1p1/4032,c59478/f1p1/3955.1,c59509/f1p1/3918,c61518/f1p1/3865,c61615/f3p1/3695,c63152/f2p6/3912,c64092…
chr12	Alternative 5' splice site	7736612	7736652	+	chr12:7734889-7741841W	c50677/f2p1/3902,c42128/f1p1/4024,c47293/f3p2/3747,c49173/f14p1/3958,c51773/f1p0/4847.1,c54741/f1p0/3638.1,c60411/f1p0/4084
chr12	Intron retention	7739898	7739970	+	chr12:7734889-7741841W	c42128/f1p1/4024,c47293/f3p2/3747,c49173/f14p1/3958,c50677/f2p1/3902,c60411/f1p0/4084
chr12	Intron retention	7760132	7760341	+	chr12:7757719-7761075W	c33964/f1p0/2904,c34139/f1p0/2640
chr12	Intron retention	7998340	7998466	+	chr12:7997833-8000091W	c19456/f1p0/1663,c12352/f1p2/1998,c1345/f3p1/1858,c24654/f1p1/1810,c25669/f1p1/1707,c3142/f2p0/2070,c3295/f1p0/1509,c5242/f1p1/1632,c5703/f1p0/2195,c8430/f1p1/1569,c9738/f2p1/2012
chr12	Mutually exclusive exon	8109320	8098383	-	chr12:8097291-8113459C	c17577/f1p0/3312,c54923/f1p0/3779,c16968/f1p0/3365,c47040/f2p0/3693,c49909/f2p0/3558,c51843/f1p0/3961
chr12	Mutually exclusive exon	8109533	8098569	-	chr12:8097291-8113459C	c16968/f1p0/3365,c47040/f2p0/3693,c49909/f2p0/3558,c51843/f1p0/3961,c18053/f1p0/3378,c29314/f1p0/3418,c54877/f1p1/3763
chr12	Alternative 3' splice site	8110762	8110745	-	chr12:8097291-8113459C	c16968/f1p0/3365,c17577/f1p0/3312,c18053/f1p0/3378,c29314/f1p0/3418,c34900/f1p0/2926,c47040/f2p0/3693,c49909/f2p0/3558,c51843/f1p0/3961,c54877/f1p1/3763,c54923/f1p0/3779
chr12	Alternative 5' splice site	815605	815626	+	chr12:813812-819135W	c13794/f3p2/2855,c18050/f1p1/3080,c23449/f2p0/2881,c25525/f11p3/2962,c32278/f3p3/3001,c36588/f1p1/2436,c47691/f1p0/2331,c14209/f5p3/2876,c19956/f3p1/2945,c47290/f1p1/2376
chr12	Alternative 5' splice site	8149155	8149485	+	chr12:8148901-8155349W	c40491/f1p0/3463,c48106/f1p0/3557,c57767/f1p0/3571.1,c61923/f1p0/3902
chr12	Intron retention	8149976	8150084	+	chr12:8148901-8155349W	c48106/f1p0/3557,c18923/f2p1/3296,c40491/f1p0/3463,c51999/f2p0/3758,c54608/f1p0/4007.2,c57767/f1p0/3571.1,c59850/f1p0/3807.1,c61923/f1p0/3902
chr12	Intron retention	8150732	8150806	+	chr12:8148901-8155349W	c61923/f1p0/3902,c18923/f2p1/3296,c40491/f1p0/3463,c48106/f1p0/3557,c51999/f2p0/3758,c57767/f1p0/3571.1,c59850/f1p0/3807.1
chr12	Intron retention	8151293	8151373	+	chr12:8148901-8155349W	c54608/f1p0/4007.1,c18923/f2p1/3296,c40491/f1p0/3463,c48106/f1p0/3557,c51999/f2p0/3758,c57767/f1p0/3571.1,c59850/f1p0/3807.1,c61923/f1p0/3902,c62891/f1p0/3520.1
chr12	Alternative 3' splice site	8152305	8152310	+	chr12:8148901-8155349W	c51999/f2p0/3758,c57767/f1p0/3571.1,c18923/f2p1/3296,c40491/f1p0/3463,c59850/f1p0/3807.1,c61923/f1p0/3902,c62891/f1p0/3520.1
chr12	Alternative 3' splice site	8152305	8152310	+	chr12:8148901-8155349W	c54608/f1p0/4007.1,c48106/f1p0/3557
chr12	Intron retention	8152471	8152554	+	chr12:8148901-8155349W	c48106/f1p0/3557,c18923/f2p1/3296,c40491/f1p0/3463,c59850/f1p0/3807.1,c61923/f1p0/3902,c62891/f1p0/3520.1
chr12	Intron retention	8152471	8152554	+	chr12:8148901-8155349W	c54608/f1p0/4007.1,c57767/f1p0/3571.1
chr12	Intron retention	8152471	8152549	+	chr12:8148901-8155349W	c54608/f1p0/4007.1,c51999/f2p0/3758
chr12	Alternative 3' splice site	8152549	8152554	+	chr12:8148901-8155349W	c51999/f2p0/3758,c18923/f2p1/3296,c40491/f1p0/3463,c57767/f1p0/3571.1,c59850/f1p0/3807.1,c61923/f1p0/3902,c62891/f1p0/3520.1
chr12	Intron retention	83889	83784	-	chr12:81683-85213C	c15546/f1p0/3055,c35350/f1p0/2717,c44264/f1p0/2720
chr12	Alternative 5' splice site	8289121	8289379	+	chr12:8284874-8295465W	c42067/f1p1/3901,c61011/f1p2/4064
chr12	Alternative 3' splice site	846438	846395	-	chr12:844954-848413C	c5086/f1p0/2514,c9991/f1p1/2119
chr12	Intron retention	8572218	8572312	+	chr12:8569118-8574496W	c10294/f1p1/1626,c13746/f17p12/3205,c14293/f3p2/3135,c20528/f2p2/3111,c28654/f1p0/3256,c33202/f1p1/2943,c36235/f1p0/2902,c40897/f1p3/3154,c45721/f1p0/2796,c22439/f1p0/2952
chr12	Alternative 3' splice site	8572775	8572792	+	chr12:8569118-8574496W	c10294/f1p1/1626,c13746/f17p12/3205,c14293/f3p2/3135,c22439/f1p0/2952,c28654/f1p0/3256,c33202/f1p1/2943,c40897/f1p3/3154,c45721/f1p0/2796,c20528/f2p2/3111,c36235/f1p0/2902
chr12	Mutually exclusive exon	8831037	8825948	-	chr12:8739505-8933868C	c54067/f1p1/3774.1,c56754/f1p0/6867.1,c39447/f3p1/3725,c49969/f2p2/3895,c53057/f1p0/3740.1,c58145/f1p2/3706,c61158/f1p2/3837
chr12	Alternative 3' splice site	8831983	8831973	-	chr12:8739505-8933868C	c39447/f3p1/3725,c49969/f2p2/3895,c54067/f1p1/3774.1,c61158/f1p2/3837,c47453/f6p4/3719,c53057/f1p0/3740.1,c56754/f1p0/6867.1,c58145/f1p2/3706,c61515/f1p3/3803
chr12	Alternative 5' splice site	8833832	8833816	-	chr12:8739505-8933868C	c61158/f1p2/3837,c47453/f6p4/3719
chr12	Intron retention	8964076	8964406	+	chr12:8963528-8972345W	c51659/f1p3/4044,c57296/f1p2/3898,c26555/f22p7/3636,c37887/f5p3/3721,c39993/f1p2/3452,c42942/f1p0/3300,c46042/f1p3/3717,c48058/f1p0/3667.1,c49504/f3p2/3686,c49704/f2p2/3554,c50594/f1p1/4030.2,c51903/f1p1/3615,c59026/f2p0/3704
chr12	Intron retention	8965530	8965646	+	chr12:8963528-8972345W	c51659/f1p3/4044,c26555/f22p7/3636,c37887/f5p3/3721,c39993/f1p2/3452,c42942/f1p0/3300,c46042/f1p3/3717,c48058/f1p0/3667.1,c49504/f3p2/3686,c49704/f2p2/3554,c50594/f1p1/4030.1,c51903/f1p1/3615,c57296/f1p2/3898,c59026/f2p0/3704
chr12	Alternative 5' splice site	8966187	8966267	+	chr12:8963528-8972345W	c26555/f22p7/3636,c37887/f5p3/3721,c39993/f1p2/3452,c40266/f1p7/2967,c42942/f1p0/3300,c46042/f1p3/3717,c48058/f1p0/3667.1,c49504/f3p2/3686,c49704/f2p2/3554,c50594/f1p1/4030.1,c51659/f1p3/4044,c57296/f1p2/3898,c59026/f2p0/3704,c51903/f1p1/3615
chr12	Intron retention	8967481	8967555	+	chr12:8963528-8972345W	c49504/f3p2/3686,c26555/f22p7/3636,c31896/f1p2/2783,c37887/f5p3/3721,c39993/f1p2/3452,c40266/f1p7/2967,c42942/f1p0/3300,c46042/f1p3/3717,c48058/f1p0/3667.1,c49704/f2p2/3554,c50594/f1p1/4030.1,c51659/f1p3/4044,c51903/f1p1/3615,c57296/f1p2/3898
chr12	Intron retention	8967857	8967964	+	chr12:8963528-8972345W	c59026/f2p0/3704,c26555/f22p7/3636,c31896/f1p2/2783,c37887/f5p3/3721,c39993/f1p2/3452,c40266/f1p7/2967,c42942/f1p0/3300,c46042/f1p3/3717,c48058/f1p0/3667.1,c49704/f2p2/3554,c50594/f1p1/4030.1,c51659/f1p3/4044,c51903/f1p1/3615,c57296/f1p2/3898
chr12	Alternative 3' splice site	8970226	8970230	+	chr12:8963528-8972345W	c26555/f22p7/3636,c31896/f1p2/2783,c37887/f5p3/3721,c39993/f1p2/3452,c40266/f1p7/2967,c42942/f1p0/3300,c46042/f1p3/3717,c49504/f3p2/3686,c49704/f2p2/3554,c50594/f1p1/4030.1,c51903/f1p1/3615,c57296/f1p2/3898,c59026/f2p0/3704,c51659/f1p3/4044
chr12	Alternative 3' splice site	9545073	9545050	-	chr12:9542184-9547057C	c33256/f1p1/3264,c30954/f1p0/3367
chr12	Alternative 3' splice site	9545133	9545050	-	chr12:9542184-9547057C	c29315/f1p1/3321,c30954/f1p0/3367
chr12	Alternative 3' splice site	9545133	9545073	-	chr12:9542184-9547057C	c29315/f1p1/3321,c33256/f1p1/3264
chr12	Intron retention	9683942	9683820	-	chr12:9683773-9693195C	c45022/f1p1/3243,c16559/f1p1/2821
chr12	Intron retention	9683952	9683830	-	chr12:9683773-9693195C	c45022/f1p1/3243,c32370/f1p2/3336
chr12	Alternative 5' splice site	9683971	9683942	-	chr12:9683773-9693195C	c22220/f1p1/3255,c59157/f1p1/3912,c16559/f1p1/2821,c17818/f1p0/3118,c52438/f1p1/3609,c59684/f1p0/4007.1
chr12	Alternative 5' splice site	9683974	9683942	-	chr12:9683773-9693195C	c60852/f1p4/3804,c16559/f1p1/2821,c17818/f1p0/3118,c52438/f1p1/3609,c59684/f1p0/4007.1
chr12	Alternative 5' splice site	9683974	9683971	-	chr12:9683773-9693195C	c60852/f1p4/3804,c22220/f1p1/3255,c59157/f1p1/3912
chr12	Intron retention	9683980	9683837	-	chr12:9683773-9693195C	c50139/f1p0/3375,c60827/f1p1/3629.2,c36625/f1p1/2937
chr12	Intron retention	9686150	9686057	-	chr12:9683773-9693195C	c16559/f1p1/2821,c50139/f1p0/3375,c17818/f1p0/3118,c22220/f1p1/3255,c32370/f1p2/3336,c36625/f1p1/2937,c40329/f2p2/3752,c45022/f1p1/3243,c51246/f1p0/3886.1,c60852/f1p4/3804
chr12	Intron retention	9686150	9686057	-	chr12:9683773-9693195C	c52438/f1p1/3609,c59684/f1p0/4007.1,c50062/f2p0/3623,c59157/f1p1/3912
chr12	Intron retention	9686705	9686308	-	chr12:9683773-9693195C	c50062/f2p0/3623,c59157/f1p1/3912,c17818/f1p0/3118,c22220/f1p1/3255,c32370/f1p2/3336,c36625/f1p1/2937,c40329/f2p2/3752,c45022/f1p1/3243,c51246/f1p0/3886.1,c60852/f1p4/3804
chr12	Intron retention	9686705	9686308	-	chr12:9683773-9693195C	c52438/f1p1/3609,c59684/f1p0/4007.1,c16559/f1p1/2821,c50139/f1p0/3375
chr12	Intron retention	9686705	9686057	-	chr12:9683773-9693195C	c52438/f1p1/3609,c59684/f1p0/4007.1,c17818/f1p0/3118,c22220/f1p1/3255,c32370/f1p2/3336,c36625/f1p1/2937,c40329/f2p2/3752,c45022/f1p1/3243,c51246/f1p0/3886.1,c60852/f1p4/3804
chr12	Intron retention	9687971	9687810	-	chr12:9683773-9693195C	c59157/f1p1/3912,c16559/f1p1/2821,c17818/f1p0/3118,c22220/f1p1/3255,c32370/f1p2/3336,c36625/f1p1/2937,c40329/f2p2/3752,c45022/f1p1/3243,c50062/f2p0/3623,c50139/f1p0/3375,c51246/f1p0/3886.1,c52438/f1p1/3609,c60827/f1p1/3629.1,c60852/f1p4/3804
chr13	Intron retention	10204108	10203398	-	chr13:10201891-10206009C	c60940/f1p1/3768,c34477/f1p2/2964
chr13	Exon skipping	10681073	10680993	-	chr13:10679046-10683935C	c4601/f1p0/1967,c11859/f1p1/2024.1,c12334/f1p1/1936,c24974/f1p1/1820
chr13	Alternative 3' splice site	10803018	10803051	+	chr13:10802587-10813157W	c23569/f1p1/2847,c26975/f3p6/2963,c28585/f1p1/2831,c38730/f2p5/3966,c24062/f2p4/2906
chr13	Intron retention	10805386	10805457	+	chr13:10802587-10813157W	c51137/f1p0/3994.1,c15264/f6p6/3065,c17053/f2p5/2960,c23569/f1p1/2847,c24062/f2p4/2906,c26975/f3p6/2963,c36967/f1p1/2899,c38730/f2p5/3966
chr13	Intron retention	11686921	11686524	-	chr13:11684129-11688448C	c30585/f1p0/2999,c6203/f1p0/1589
chr13	Alternative 3' splice site	12156436	12156604	+	chr13:12149364-12160792W	c15302/f1p0/2825,c19865/f1p0/3064,c23037/f1p2/3232,c25208/f1p2/2970,c42628/f1p1/3198,c44045/f1p0/3002,c62342/f1p0/3796,c41902/f1p1/2982
chr13	Intron retention	12156931	12157369	+	chr13:12149364-12160792W	c62342/f1p0/3796,c15302/f1p0/2825,c19865/f1p0/3064,c23037/f1p2/3232,c25208/f1p2/2970,c41902/f1p1/2982,c42628/f1p1/3198,c44045/f1p0/3002
chr13	Intron retention	12157881	12157958	+	chr13:12149364-12160792W	c42628/f1p1/3198,c15302/f1p0/2825,c19865/f1p0/3064,c23037/f1p2/3232,c25208/f1p2/2970,c28315/f1p0/2882,c41902/f1p1/2982,c44045/f1p0/3002
chr13	Intron retention	12158092	12158194	+	chr13:12149364-12160792W	c62342/f1p0/3796,c15302/f1p0/2825,c19865/f1p0/3064,c23037/f1p2/3232,c25208/f1p2/2970,c28315/f1p0/2882,c41902/f1p1/2982,c44045/f1p0/3002
chr13	Intron retention	1236532	1236140	-	chr13:1234197-1274222C	c9396/f1p0/1990,c1958/f2p0/1554
chr13	Alternative 3' splice site	12421175	12420990	-	chr13:12417899-12549535C	c41785/f1p0/3280,c11823/f1p0/7280.3,c12612/f1p0/2146,c13004/f2p0/1985,c13427/f33p6/3026,c14083/f5p4/3149,c18332/f1p0/2795,c18444/f15p4/3047,c19002/f1p1/2527,c20783/f1p0/1921,c20995/f7p3/3115,c22937/f5p6/3152,c24409/f1p0/3617.1,c26177/f15p3/3026,c26906/f6p4/3117,c29940/f1p0/2692.1,c31816/f1p2/3123,c36782/f2p0/2912,c43902/f1p0/2810
chr13	Exon skipping	12455754	12455443	-	chr13:12417899-12549535C	c10948/f1p0/1612,c10971/f1p0/1858,c2810/f1p0/1687,c3606/f1p0/2096
chr13	Intron retention	1277721	1277811	+	chr13:1276135-1280909W	c2937/f1p1/2032,c24037/f1p0/2974,c24389/f1p4/2808,c38059/f3p6/2971,c42594/f1p1/2747,c48342/f6p5/2867
chr13	Alternative 3' splice site	1278898	1278901	+	chr13:1276135-1280909W	c42594/f1p1/2747,c24037/f1p0/2974,c24389/f1p4/2808,c38059/f3p6/2971,c48342/f6p5/2867
chr13	Alternative 3' splice site	13930945	13931014	+	chr13:13929660-13935113W	c46165/f1p1/2885,c25142/f2p1/2790
chr13	Exon skipping	14193324	14193383	+	chr13:14177119-14197867W	c38443/f3p4/3798,c38488/f4p3/3958,c46727/f1p0/3939,c48191/f16p11/3930,c51728/f1p2/3977.1,c51883/f1p0/4072.2,c51936/f2p1/3848,c52661/f1p2/3630,c54550/f1p3/3667,c57928/f4p7/3811,c44826/f2p2/3952
chr13	Intron retention	14196306	14196386	+	chr13:14177119-14197867W	c38443/f3p4/3798,c38488/f4p3/3958,c51936/f2p1/3848,c54550/f1p3/3667,c44826/f2p2/3952,c46308/f1p0/2718,c46727/f1p0/3939,c48191/f16p11/3930,c52661/f1p2/3630,c57928/f4p7/3811
chr13	Alternative 5' splice site	14491031	14491047	+	chr13:14489511-14497316W	c22178/f1p0/2804,c27552/f1p0/2743,c30242/f1p0/2721,c30442/f1p0/2804,c33344/f1p0/3063,c11248/f1p0/1985,c21608/f1p2/2881,c27200/f1p0/3052,c28726/f1p0/2932,c30578/f1p0/2813,c31670/f1p1/2950,c32208/f1p0/2822,c32899/f1p0/2652,c34784/f1p1/2856,c35611/f1p0/2799,c40827/f1p0/3157,c45388/f1p1/2922,c45808/f1p0/3076,c50386/f1p0/3148,c50578/f1p0/3767,c51000/f1p2/3729
chr13	Intron retention	14493579	14494280	+	chr13:14489511-14497316W	c50578/f1p0/3767,c51000/f1p2/3729,c21608/f1p2/2881,c22178/f1p0/2804,c27200/f1p0/3052,c27552/f1p0/2743,c28726/f1p0/2932,c30242/f1p0/2721,c30442/f1p0/2804,c30578/f1p0/2813,c31670/f1p1/2950,c32208/f1p0/2822,c32899/f1p0/2652,c33344/f1p0/3063,c34784/f1p1/2856,c35611/f1p0/2799,c40827/f1p0/3157,c45388/f1p1/2922,c45808/f1p0/3076,c50386/f1p0/3148
chr13	Alternative 3' splice site	14494434	14494438	+	chr13:14489511-14497316W	c21608/f1p2/2881,c22178/f1p0/2804,c27200/f1p0/3052,c27552/f1p0/2743,c28726/f1p0/2932,c30242/f1p0/2721,c30442/f1p0/2804,c30578/f1p0/2813,c31670/f1p1/2950,c32208/f1p0/2822,c32899/f1p0/2652,c33344/f1p0/3063,c34784/f1p1/2856,c35611/f1p0/2799,c40827/f1p0/3157,c45388/f1p1/2922,c45808/f1p0/3076,c50386/f1p0/3148,c51000/f1p2/3729,c50578/f1p0/3767
chr13	Alternative 5' splice site	14495032	14495145	+	chr13:14489511-14497316W	c27552/f1p0/2743,c32899/f1p0/2652,c40827/f1p0/3157,c51000/f1p2/3729,c21608/f1p2/2881,c22178/f1p0/2804,c27200/f1p0/3052,c28726/f1p0/2932,c30242/f1p0/2721,c30442/f1p0/2804,c30578/f1p0/2813,c33344/f1p0/3063,c34784/f1p1/2856,c45388/f1p1/2922,c50386/f1p0/3148,c50578/f1p0/3767
chr13	Intron retention	14495032	14495226	+	chr13:14489511-14497316W	c31670/f1p1/2950,c32208/f1p0/2822,c35611/f1p0/2799,c45808/f1p0/3076,c27552/f1p0/2743,c32899/f1p0/2652,c40827/f1p0/3157,c51000/f1p2/3729
chr13	Intron retention	14495145	14495226	+	chr13:14489511-14497316W	c31670/f1p1/2950,c32208/f1p0/2822,c35611/f1p0/2799,c45808/f1p0/3076,c21608/f1p2/2881,c22178/f1p0/2804,c27200/f1p0/3052,c28726/f1p0/2932,c30242/f1p0/2721,c30442/f1p0/2804,c30578/f1p0/2813,c33344/f1p0/3063,c34784/f1p1/2856,c45388/f1p1/2922,c50386/f1p0/3148,c50578/f1p0/3767
chr13	Alternative 5' splice site	14495596	14495613	+	chr13:14489511-14497316W	c21608/f1p2/2881,c27200/f1p0/3052,c27552/f1p0/2743,c30242/f1p0/2721,c30578/f1p0/2813,c31670/f1p1/2950,c32208/f1p0/2822,c32899/f1p0/2652,c34784/f1p1/2856,c40827/f1p0/3157,c45388/f1p1/2922,c45808/f1p0/3076,c50386/f1p0/3148,c50578/f1p0/3767,c51000/f1p2/3729,c22178/f1p0/2804,c28726/f1p0/2932,c30442/f1p0/2804,c33344/f1p0/3063,c35611/f1p0/2799
chr13	Alternative 3' splice site	14496158	14496166	+	chr13:14489511-14497316W	c30442/f1p0/2804,c21608/f1p2/2881,c22178/f1p0/2804,c27200/f1p0/3052,c27552/f1p0/2743,c28726/f1p0/2932,c30242/f1p0/2721,c30578/f1p0/2813,c31670/f1p1/2950,c32208/f1p0/2822,c32899/f1p0/2652,c33344/f1p0/3063,c34784/f1p1/2856,c35611/f1p0/2799,c40827/f1p0/3157,c45388/f1p1/2922,c45808/f1p0/3076,c50386/f1p0/3148,c50578/f1p0/3767,c51000/f1p2/3729
chr13	Intron retention	14496375	14496452	+	chr13:14489511-14497316W	c34784/f1p1/2856,c21608/f1p2/2881,c22178/f1p0/2804,c27200/f1p0/3052,c27552/f1p0/2743,c28726/f1p0/2932,c30242/f1p0/2721,c30442/f1p0/2804,c30578/f1p0/2813,c31670/f1p1/2950,c32208/f1p0/2822,c32899/f1p0/2652,c33344/f1p0/3063,c35611/f1p0/2799,c40827/f1p0/3157,c45388/f1p1/2922,c45808/f1p0/3076,c50386/f1p0/3148,c51000/f1p2/3729
chr13	Intron retention	14496525	14496724	+	chr13:14489511-14497316W	c50578/f1p0/3767,c21608/f1p2/2881,c22178/f1p0/2804,c27200/f1p0/3052,c27552/f1p0/2743,c28726/f1p0/2932,c30242/f1p0/2721,c30442/f1p0/2804,c30578/f1p0/2813,c31670/f1p1/2950,c32208/f1p0/2822,c32899/f1p0/2652,c33344/f1p0/3063,c35611/f1p0/2799,c40827/f1p0/3157,c45388/f1p1/2922,c45808/f1p0/3076,c50386/f1p0/3148,c51000/f1p2/3729
chr13	Alternative 5' splice site	14495032	14495145	+	chr13:14489976-14497221W	c35268/f1p0/2591,c14355/f4p1/2783,c34276/f1p0/2603
chr13	Alternative 5' splice site	14495596	14495613	+	chr13:14489976-14497221W	c14355/f4p1/2783,c34276/f1p0/2603,c35268/f1p0/2591
chr13	Alternative 5' splice site	14491031	14491047	+	chr13:14490253-14497236W	c28928/f1p0/3033.1,c34831/f1p1/2975.1,c8626/f1p0/2140
chr13	Alternative 5' splice site	14495032	14495145	+	chr13:14490253-14497236W	c2793/f1p0/1761,c34831/f1p1/2975.1,c7624/f1p1/1829
chr13	Intron retention	14495032	14495226	+	chr13:14490253-14497236W	c28928/f1p0/3033.1,c8626/f1p0/2140,c2793/f1p0/1761
chr13	Intron retention	14495145	14495226	+	chr13:14490253-14497236W	c28928/f1p0/3033.1,c8626/f1p0/2140,c34831/f1p1/2975.1,c7624/f1p1/1829
chr13	Alternative 5' splice site	14495596	14495613	+	chr13:14490253-14497236W	c2793/f1p0/1761,c28928/f1p0/3033.1,c7624/f1p1/1829,c8626/f1p0/2140,c34831/f1p1/2975.1
chr13	Intron retention	14801283	14801364	+	chr13:14798381-14803015W	c45767/f6p2/3810,c48454/f8p2/3872,c49226/f6p1/3751,c51298/f1p1/3732,c51863/f1p1/3536,c61462/f1p3/3764,c40698/f1p1/3842
chr13	Intron retention	1527633	1527521	-	chr13:1526421-1535072C	c55972/f1p1/3716,c56845/f1p0/4432.2
chr13	Exon skipping	15449501	15449560	+	chr13:15448380-15451480W	c39051/f1p0/2828,c15593/f1p0/2761
chr13	Exon skipping	15576741	15576839	+	chr13:15575697-15610589W	c32539/f1p0/2501.2,c31858/f1p1/2282,c32796/f1p1/2757
chr13	Alternative 5' splice site	15620004	15620026	+	chr13:15619006-15624241W	c10952/f1p0/1885,c12597/f1p0/1924
chr13	Intron retention	15620004	15621600	+	chr13:15619006-15624241W	c44665/f1p1/3331,c10952/f1p0/1885
chr13	Intron retention	15620026	15621600	+	chr13:15619006-15624241W	c44665/f1p1/3331,c12597/f1p0/1924
chr13	Alternative 3' splice site	15621966	15621972	+	chr13:15619006-15624241W	c12597/f1p0/1924,c44665/f1p1/3331,c10952/f1p0/1885
chr13	Intron retention	15991440	15991422	-	chr13:15991288-15999486C	c24785/f1p0/2939.2,c29682/f1p0/2822
chr13	Intron retention	15992772	15992412	-	chr13:15991288-15999486C	c29682/f1p0/2822,c24785/f1p0/2939.2,c31691/f1p0/3471,c34662/f1p0/2806,c43048/f1p1/2545,c48427/f2p0/2822
chr13	Intron retention	15993384	15993317	-	chr13:15991288-15999486C	c29682/f1p0/2822,c31691/f1p0/3471,c34662/f1p0/2806,c43048/f1p1/2545,c48427/f2p0/2822
chr13	Intron retention	15995972	15995624	-	chr13:15991288-15999486C	c34662/f1p0/2806,c48427/f2p0/2822,c31691/f1p0/3471,c43048/f1p1/2545
chr13	Exon skipping	16636650	16636557	-	chr13:16633141-16651099C	c63853/f3p4/3814,c64179/f5p4/3681,c50025/f2p0/3801,c57474/f1p1/4082
chr13	Intron retention	16641304	16640989	-	chr13:16633141-16651099C	c57474/f1p1/4082,c50025/f2p0/3801,c50321/f1p0/4372.1,c63853/f3p4/3814,c64179/f5p4/3681
chr13	Mutually exclusive exon	16643717	16642602	-	chr13:16633141-16651099C	c50025/f2p0/3801,c50321/f1p0/4372.1,c57474/f1p1/4082,c64179/f5p4/3681,c63853/f3p4/3814
chr13	Alternative 5' splice site	16645355	16645351	-	chr13:16633141-16651099C	c50025/f2p0/3801,c50321/f1p0/4372.1,c63853/f3p4/3814,c64179/f5p4/3681,c57474/f1p1/4082
chr13	Alternative 5' splice site	16648295	16648291	-	chr13:16633141-16651099C	c50321/f1p0/4372.1,c57474/f1p1/4082,c50025/f2p0/3801,c63853/f3p4/3814,c64179/f5p4/3681
chr13	Intron retention	17525969	17525499	-	chr13:17524468-17534577C	c32259/f1p0/2613,c20137/f1p0/2955.1,c2378/f3p0/2024
chr13	Intron retention	17529285	17529198	-	chr13:17524468-17534577C	c32259/f1p0/2613,c20137/f1p0/2955.1,c2378/f3p0/2024
chr13	Alternative 5' splice site	17532616	17532607	-	chr13:17524468-17534577C	c2378/f3p0/2024,c32259/f1p0/2613,c53579/f1p0/3835
chr13	Intron retention	17532901	17532794	-	chr13:17524468-17534577C	c20137/f1p0/2955.2,c2378/f3p0/2024,c32259/f1p0/2613
chr13	Alternative 3' splice site	17533018	17532990	-	chr13:17524468-17534577C	c2378/f3p0/2024,c32259/f1p0/2613,c53579/f1p0/3835
chr13	Intron retention	17597869	17597405	-	chr13:17596974-17601244C	c41277/f1p0/3574,c33325/f1p1/3188
chr13	Intron retention	17869068	17868890	-	chr13:17867577-17872779C	c6995/f1p0/1764,c17987/f1p0/2799.1
chr13	Intron retention	18106096	18106017	-	chr13:18026547-18129143C	c57359/f1p0/3798,c59676/f1p0/3618,c61310/f1p0/3799
chr13	Alternative 3' splice site	18391598	18391630	+	chr13:18382788-18491316W	c28816/f1p0/3158,c45256/f1p0/2978,c50261/f1p0/4198,c52783/f1p5/4240,c59481/f1p5/4015,c61493/f1p5/3680,c50924/f1p1/3853
chr13	Alternative 5' splice site	18397354	18397356	+	chr13:18382788-18491316W	c50261/f1p0/4198,c52783/f1p5/4240,c59481/f1p5/4015,c28816/f1p0/3158,c50924/f1p1/3853,c61493/f1p5/3680
chr13	Intron retention	18824956	18824855	-	chr13:18823903-18831104C	c16002/f1p1/2874,c14419/f3p5/2753,c27625/f1p1/2993.2,c36627/f1p5/2911,c36837/f1p0/2640
chr13	Exon skipping	18895402	18895571	+	chr13:18893905-18898140W	c5442/f1p1/1259,c4974/f1p0/1532
chr13	Alternative 5' splice site	19073328	19073296	-	chr13:19060143-19129188C	c50487/f1p0/3568.1,c54360/f1p1/3826.3,c56092/f1p0/3413.2,c60251/f1p1/3729.2
chr13	Intron retention	19123592	19123301	-	chr13:19060143-19129188C	c54360/f1p1/3826.2,c50487/f1p0/3568.2,c56092/f1p0/3413.1,c60251/f1p1/3729.1
chr13	Intron retention	19125117	19125014	-	chr13:19060143-19129188C	c56092/f1p0/3413.1,c60251/f1p1/3729.1,c50487/f1p0/3568.2
chr13	Exon skipping	20666880	20666936	+	chr13:20664573-20670676W	c14744/f2p2/2830,c31016/f1p2/2649,c33450/f1p0/3078
chr13	Alternative 3' splice site	20802732	20802741	+	chr13:20802446-20905813W	c40427/f1p2/4238,c52452/f1p0/4181
chr13	Alternative 3' splice site	20803607	20803627	+	chr13:20802446-20905813W	c40427/f1p2/4238,c52452/f1p0/4181
chr13	Mutually exclusive exon	20808558	20819287	+	chr13:20802446-20905813W	c56618/f1p0/3979,c31083/f1p0/3200,c40427/f1p2/4238,c52452/f1p0/4181
chr13	Alternative 3' splice site	21027272	21027238	-	chr13:21026190-21030476C	c46519/f1p1/3883.1,c51081/f1p1/3796.1
chr13	Intron retention	21027364	21027272	-	chr13:21026190-21030476C	c39969/f1p0/2674,c55388/f1p1/3924
chr13	Alternative 5' splice site	21027420	21027364	-	chr13:21026190-21030476C	c30832/f1p1/2569,c31843/f2p1/2780,c46519/f1p1/3883.1,c55388/f1p1/3924
chr13	Intron retention	21027420	21027272	-	chr13:21026190-21030476C	c39969/f1p0/2674,c30832/f1p1/2569
chr13	Intron retention	21027898	21027809	-	chr13:21026190-21030476C	c38289/f2p0/2852,c45295/f1p0/2702,c30832/f1p1/2569,c31843/f2p1/2780,c46519/f1p1/3883.1,c51081/f1p1/3796.1
chr13	Alternative 3' splice site	21327957	21327988	+	chr13:21326937-21330977W	c24851/f1p2/1641,c2488/f2p3/1704,c25705/f2p3/1785,c7292/f1p0/1498
chr13	Exon skipping	21423935	21424195	+	chr13:21422883-21426574W	c7738/f1p0/2191,c19988/f1p0/2704,c35221/f1p0/2700
chr13	Intron retention	21425060	21425158	+	chr13:21422883-21426574W	c19988/f1p0/2704,c35221/f1p0/2700,c7738/f1p0/2191
chr13	Intron retention	21425559	21425705	+	chr13:21422883-21426574W	c35221/f1p0/2700,c19988/f1p0/2704
chr13	Alternative 5' splice site	21425559	21425842	+	chr13:21422883-21426574W	c7738/f1p0/2191,c35221/f1p0/2700
chr13	Exon skipping	21425705	21425842	+	chr13:21422883-21426574W	c7738/f1p0/2191,c19988/f1p0/2704
chr13	Intron retention	22185730	22185648	-	chr13:22184019-22189663C	c47083/f1p0/3359,c20347/f1p0/3128
chr13	Intron retention	22187264	22187118	-	chr13:22184019-22189663C	c20347/f1p0/3128,c47083/f1p0/3359
chr13	Intron retention	22283815	22283056	-	chr13:22259113-22367857C	c34255/f1p0/2831,c1267/f3p1/1825
chr13	Mutually exclusive exon	22349676	22285094	-	chr13:22259113-22367857C	c1267/f3p1/1825,c17998/f1p1/1712,c18586/f1p1/1820,c34255/f1p0/2831,c9224/f1p0/1911
chr13	Alternative 3' splice site	22352645	22352720	+	chr13:22309782-22409783W	c33729/f1p2/3046,c21400/f1p2/3078
chr13	Intron retention	22353966	22354506	+	chr13:22309782-22409783W	c51121/f1p1/4015,c21400/f1p2/3078,c25095/f1p1/3371,c33729/f1p2/3046,c47826/f1p0/3853,c51626/f1p0/4224
chr13	Intron retention	274310	274788	+	chr13:232174-308096W	c20060/f1p1/2930,c14260/f2p1/2523,c9000/f1p0/2230
chr13	Intron retention	288982	289459	+	chr13:232174-308096W	c32253/f1p0/2790,c44158/f1p0/2647
chr13	Intron retention	23906125	23906008	-	chr13:23903926-23911441C	c62811/f1p0/4181.1,c7459/f1p0/2250
chr13	Intron retention	2496040	2496242	+	chr13:2493651-2498006W	c47086/f1p0/3121,c29886/f1p0/2824
chr13	Intron retention	26636601	26636817	+	chr13:26632408-26641739W	c42061/f1p3/3718,c61476/f1p2/4153,c49926/f2p3/3922
chr13	Alternative 5' splice site	26636937	26636938	+	chr13:26632408-26641739W	c42125/f1p1/3741,c50491/f1p1/3769
chr13	Intron retention	26636937	26637152	+	chr13:26632408-26641739W	c42061/f1p3/3718,c61476/f1p2/4153,c42125/f1p1/3741
chr13	Intron retention	26636938	26637152	+	chr13:26632408-26641739W	c42061/f1p3/3718,c61476/f1p2/4153,c50491/f1p1/3769
chr13	Exon skipping	27299214	27299349	+	chr13:27297708-27305672W	c50541/f2p2/3788,c57132/f1p0/4079,c51379/f1p2/3875
chr13	Exon skipping	27299214	27299978	+	chr13:27297708-27305672W	c44780/f1p0/3677,c51379/f1p2/3875
chr13	Exon skipping	27299911	27299978	+	chr13:27297708-27305672W	c44780/f1p0/3677,c50541/f2p2/3788,c57132/f1p0/4079
chr13	Intron retention	27304111	27304350	+	chr13:27297708-27305672W	c57132/f1p0/4079,c50541/f2p2/3788,c51379/f1p2/3875
chr13	Intron retention	2749119	2747227	-	chr13:2746336-2763227C	c55582/f1p0/3892,c26540/f2p1/2822
chr13	Intron retention	2749973	2749679	-	chr13:2746336-2763227C	c26540/f2p1/2822,c35554/f1p0/2683.1
chr13	Intron retention	28206909	28207000	+	chr13:28204082-28212467W	c54008/f1p0/3579,c52684/f1p0/3993,c55680/f1p0/3393.1
chr13	Alternative 3' splice site	2847042	2846991	-	chr13:2845035-2847190C	c7072/f1p0/1747,c9661/f1p0/1754
chr13	Alternative 3' splice site	2893491	2893459	-	chr13:2890132-2901740C	c60568/f1p3/4019,c37789/f24p16/4048,c42026/f1p0/4055,c55631/f1p4/3819,c58028/f1p1/3925,c62772/f1p0/4278.1
chr13	Mutually exclusive exon	30650185	30647052	-	chr13:30642096-30652300C	c30894/f1p1/2694,c40232/f1p2/2740,c6302/f1p1/2123,c16590/f4p1/2790
chr13	Intron retention	30750863	30750768	-	chr13:30750221-30771609C	c23670/f1p1/3175,c26343/f3p2/2778
chr13	Intron retention	30751285	30750974	-	chr13:30750221-30771609C	c22898/f1p0/2205,c30173/f1p0/3193,c33737/f1p0/3019,c38915/f1p1/3101,c20794/f1p2/2870,c24779/f1p2/3008,c26218/f3p2/2836,c26343/f3p2/2778,c26790/f3p1/3158,c28138/f1p0/2649,c28675/f1p0/3494.1,c29549/f1p0/2827,c43296/f1p1/3007
chr13	Intron retention	30754795	30754669	-	chr13:30750221-30771609C	c26790/f3p1/3158,c43296/f1p1/3007
chr13	Alternative 3' splice site	31338502	31338517	+	chr13:31338078-31340587W	c9568/f1p0/1878,c10823/f2p0/1798,c11192/f1p0/1656
chr13	Intron retention	32155313	32154524	-	chr13:32152233-32158373C	c61221/f1p0/3695,c16237/f3p2/2878,c26615/f2p0/2862,c27035/f2p2/2985,c27743/f2p2/2914,c30854/f1p0/2908,c33213/f1p0/2911,c45812/f1p0/2732,c47259/f1p0/2889
chr13	Alternative 5' splice site	32155969	32155904	-	chr13:32152233-32158373C	c27743/f2p2/2914,c33213/f1p0/2911,c45812/f1p0/2732,c30854/f1p0/2908
chr13	Alternative 3' splice site	32156374	32156369	-	chr13:32152233-32158373C	c27035/f2p2/2985,c27743/f2p2/2914,c45812/f1p0/2732,c47259/f1p0/2889
chr13	Alternative 3' splice site	32156380	32156374	-	chr13:32152233-32158373C	c16237/f3p2/2878,c26615/f2p0/2862,c30222/f1p1/2734,c27035/f2p2/2985,c27743/f2p2/2914,c45812/f1p0/2732
chr13	Alternative 3' splice site	32156380	32156369	-	chr13:32152233-32158373C	c16237/f3p2/2878,c26615/f2p0/2862,c30222/f1p1/2734,c47259/f1p0/2889
chr13	Intron retention	32156468	32156380	-	chr13:32152233-32158373C	c30854/f1p0/2908,c33213/f1p0/2911,c61221/f1p0/3695,c16237/f3p2/2878,c26615/f2p0/2862,c30222/f1p1/2734
chr13	Intron retention	32156468	32156374	-	chr13:32152233-32158373C	c30854/f1p0/2908,c33213/f1p0/2911,c61221/f1p0/3695,c27035/f2p2/2985,c27743/f2p2/2914,c45812/f1p0/2732
chr13	Intron retention	32156468	32156369	-	chr13:32152233-32158373C	c30854/f1p0/2908,c33213/f1p0/2911,c61221/f1p0/3695,c47259/f1p0/2889
chr13	Intron retention	32171090	32172163	+	chr13:32170235-32173834W	c35930/f1p1/3065,c7051/f1p0/2471
chr13	Intron retention	32435904	32435956	+	chr13:32432307-32436878W	c34080/f1p0/2758,c15885/f1p0/2145,c25419/f1p0/2882,c35998/f1p0/2681,c41602/f1p0/2707
chr13	Intron retention	32798900	32798824	-	chr13:32797844-32801564C	c2972/f1p0/2015,c8667/f1p0/1884,c8963/f1p0/2157
chr13	Alternative 3' splice site	32800185	32800158	-	chr13:32797844-32801564C	c2972/f1p0/2015,c8667/f1p0/1884,c8963/f1p0/2157
chr13	Alternative 5' splice site	33003623	33003635	+	chr13:33000693-33006418W	c16677/f3p0/2776,c45981/f1p0/2822
chr13	Intron retention	33512341	33512756	+	chr13:33510353-33513427W	c34762/f1p0/2829,c43536/f1p0/2624
chr13	Alternative 3' splice site	34399736	34399720	-	chr13:34396013-34400586C	c52448/f1p10/3869,c38330/f13p10/3916,c41664/f8p4/3845,c53438/f2p3/3741,c59021/f2p0/3740
chr13	Alternative 5' splice site	35437631	35437630	-	chr13:35436058-35440582C	c32503/f1p0/2196,c22339/f1p0/2138
chr13	Alternative 5' splice site	3554414	3554284	-	chr13:3551266-3557159C	c17319/f5p14/2998,c26411/f3p7/3002,c27792/f1p0/2750,c27993/f1p0/3558.1,c30318/f1p1/2658,c32470/f1p4/2968,c35737/f1p6/2791,c40692/f1p2/2970,c26616/f2p4/3086
chr13	Intron retention	3555166	3555058	-	chr13:3551266-3557159C	c32470/f1p4/2968,c17319/f5p14/2998,c26411/f3p7/3002,c26616/f2p4/3086,c27792/f1p0/2750,c27993/f1p0/3558.1,c30318/f1p1/2658,c35737/f1p6/2791,c40692/f1p2/2970
chr13	Alternative 5' splice site	36365248	36365247	-	chr13:36360163-36368814C	c44747/f1p0/2843,c17945/f5p0/2880,c33302/f1p0/3177
chr13	Intron retention	37788791	37788677	-	chr13:37784743-37791729C	c34230/f1p1/3378,c14565/f5p1/3328,c15671/f2p1/3209,c35600/f1p1/3094,c46545/f1p0/2994,c53480/f1p1/3611.1
chr13	Alternative 3' splice site	38622943	38622152	-	chr13:38618995-38623704C	c60743/f1p0/3619,c27455/f2p0/2711,c30548/f1p2/2827,c35545/f1p1/3063,c45468/f1p0/3890,c47318/f1p2/3002
chr13	Alternative 3' splice site	38623393	38623390	-	chr13:38618995-38623704C	c30548/f1p2/2827,c27455/f2p0/2711,c35545/f1p1/3063
chr13	Intron retention	38630948	38630764	-	chr13:38629049-38633800C	c44879/f1p0/2792,c30040/f1p0/2775,c42536/f1p4/2127
chr13	Intron retention	38917188	38917106	-	chr13:38915555-39600324C	c42701/f1p0/2629,c16643/f1p0/1984,c18905/f1p0/5700.1,c2284/f3p4/1723,c25648/f1p3/1620,c32587/f1p4/2663,c33277/f1p2/2628,c34503/f1p9/2540,c34881/f1p0/6746.1,c38771/f1p0/2834.1,c44868/f1p7/2729
chr13	Alternative 3' splice site	39569526	39569558	+	chr13:39567416-39573493W	c8244/f2p0/2171,c9852/f1p0/2133
chr13	Alternative 5' splice site	39903495	39903401	-	chr13:39901763-39907574C	c27766/f1p1/2784,c19110/f2p2/2949,c27279/f1p2/2772,c29738/f2p0/3090,c32627/f1p0/9048.2
chr13	Intron retention	39904237	39903865	-	chr13:39901763-39907574C	c16567/f1p0/3339,c29738/f2p0/3090,c46015/f1p1/3820.1,c17549/f2p1/3158,c19110/f2p2/2949,c27279/f1p2/2772,c27766/f1p1/2784,c32627/f1p0/9048.2,c35184/f1p0/3117
chr13	Alternative 3' splice site	39905113	39905110	-	chr13:39901763-39907574C	c16567/f1p0/3339,c17549/f2p1/3158,c27279/f1p2/2772,c32627/f1p0/9048.2,c19110/f2p2/2949,c27766/f1p1/2784,c29738/f2p0/3090,c35184/f1p0/3117
chr13	Intron retention	39905382	39905113	-	chr13:39901763-39907574C	c56681/f1p1/3825,c16567/f1p0/3339,c17549/f2p1/3158,c27279/f1p2/2772,c32627/f1p0/9048.2
chr13	Intron retention	39905382	39905110	-	chr13:39901763-39907574C	c56681/f1p1/3825,c19110/f2p2/2949,c27766/f1p1/2784,c29738/f2p0/3090,c35184/f1p0/3117
chr13	Intron retention	3998215	3997521	-	chr13:3994421-3999123C	c41789/f1p1/2650,c1116/f4p2/1929,c1480/f3p1/1862,c655/f5p1/1981,c8982/f1p0/7932.1
chr13	Intron retention	40005265	40005187	-	chr13:40003411-40016247C	c29624/f1p0/3309.2,c35952/f1p0/3702.1
chr13	Mutually exclusive exon	40015357	40005497	-	chr13:40003411-40016247C	c29624/f1p0/3309.2,c35952/f1p0/3702.1
chr13	Intron retention	40322141	40322033	-	chr13:40320906-40325469C	c43078/f1p0/2766,c13991/f7p3/2766,c28700/f1p0/2678,c32696/f1p1/2978,c48489/f1p0/2632
chr13	Intron retention	40323121	40322202	-	chr13:40320906-40325469C	c57067/f1p0/3856,c32696/f1p1/2978
chr13	Intron retention	41383069	41384635	+	chr13:41382525-41386619W	c51683/f1p0/3811,c12002/f1p0/1842,c3207/f1p0/1920
chr13	Intron retention	41385612	41386016	+	chr13:41382525-41386619W	c51683/f1p0/3811,c12002/f1p0/1842
chr13	Intron retention	41419944	41419696	-	chr13:41418273-41425507C	c17247/f2p0/2845,c17134/f1p0/2647.2,c41265/f1p3/2727,c58362/f9p2/2677
chr13	Alternative 5' splice site	41781259	41781256	-	chr13:41779611-41784574C	c16687/f1p0/3061,c17828/f1p0/2917,c30670/f3p1/3302,c32806/f1p0/2821,c35357/f1p0/2916,c39587/f2p0/2873,c41493/f1p0/2872,c34290/f1p0/2934
chr13	Alternative 3' splice site	41783838	41783812	-	chr13:41779611-41784574C	c34290/f1p0/2934,c17828/f1p0/2917,c35357/f1p0/2916,c39587/f2p0/2873,c41493/f1p0/2872
chr13	Intron retention	41891923	41891839	-	chr13:41888539-41893927C	c23013/f1p0/1776,c15715/f1p0/1764,c5300/f1p0/1720
chr13	Alternative 5' splice site	41892428	41892411	-	chr13:41888539-41893927C	c23013/f1p0/1776,c15715/f1p0/1764,c5300/f1p0/1720
chr13	Intron retention	41904458	41904035	-	chr13:41903205-41905711C	c7894/f1p0/2088,c7428/f1p0/1726
chr13	Intron retention	4245101	4244918	-	chr13:4243128-4245422C	c16684/f1p1/2119,c22584/f1p0/1868
chr13	Alternative 3' splice site	4336691	4336645	-	chr13:4333538-4337626C	c45848/f1p0/2844,c19603/f1p0/2896
chr13	Alternative 3' splice site	4336705	4336645	-	chr13:4333538-4337626C	c27396/f1p0/3086,c29031/f2p1/3005,c19603/f1p0/2896
chr13	Alternative 3' splice site	4336705	4336691	-	chr13:4333538-4337626C	c27396/f1p0/3086,c29031/f2p1/3005,c45848/f1p0/2844
chr13	Alternative 3' splice site	4336722	4336645	-	chr13:4333538-4337626C	c26718/f2p0/3170,c26737/f2p0/3237,c32203/f1p1/3050,c34636/f1p0/3201,c35919/f1p0/3008,c38410/f2p0/2991,c19603/f1p0/2896
chr13	Alternative 3' splice site	4336722	4336705	-	chr13:4333538-4337626C	c26718/f2p0/3170,c26737/f2p0/3237,c32203/f1p1/3050,c34636/f1p0/3201,c35919/f1p0/3008,c38410/f2p0/2991,c27396/f1p0/3086,c29031/f2p1/3005
chr13	Alternative 3' splice site	4336722	4336691	-	chr13:4333538-4337626C	c26718/f2p0/3170,c26737/f2p0/3237,c32203/f1p1/3050,c34636/f1p0/3201,c35919/f1p0/3008,c38410/f2p0/2991,c45848/f1p0/2844
chr13	Intron retention	4337168	4336722	-	chr13:4333538-4337626C	c38270/f2p1/3602,c55577/f1p2/3447,c59744/f1p0/3611,c26718/f2p0/3170,c35919/f1p0/3008,c38410/f2p0/2991
chr13	Intron retention	4337168	4336705	-	chr13:4333538-4337626C	c38270/f2p1/3602,c55577/f1p2/3447,c59744/f1p0/3611,c29031/f2p1/3005
chr13	Alternative 5' splice site	4385653	4385712	+	chr13:4381670-4388560W	c55634/f1p2/3789,c37950/f11p5/3837,c49900/f2p5/3653,c57002/f3p7/3925
chr13	Intron retention	48210	48320	+	chr13:43926-50965W	c17889/f2p0/2980.2,c30505/f1p0/2675.2
chr13	Alternative 3' splice site	4435123	4435262	+	chr13:4433882-4440316W	c30197/f1p1/3267,c35426/f1p1/3110
chr13	Intron retention	4435881	4435976	+	chr13:4433882-4440316W	c17925/f1p1/3400.1,c30197/f1p1/3267,c35426/f1p1/3110,c41830/f1p1/3057
chr13	Alternative 5' splice site	4438154	4438280	+	chr13:4433882-4440316W	c41830/f1p1/3057,c17925/f1p1/3400.1
chr13	Intron retention	4438154	4438356	+	chr13:4433882-4440316W	c30197/f1p1/3267,c35426/f1p1/3110,c41830/f1p1/3057
chr13	Intron retention	4438280	4438356	+	chr13:4433882-4440316W	c30197/f1p1/3267,c35426/f1p1/3110,c17925/f1p1/3400.1
chr13	Alternative 5' splice site	4547830	4547817	-	chr13:4546641-4582005C	c25006/f1p0/1792,c4471/f1p0/1997,c7101/f1p0/1965
chr13	Intron retention	5371842	5372040	+	chr13:5313947-5645768W	c29356/f1p0/2809,c12581/f1p1/2161
chr13	Intron retention	547833	547735	-	chr13:546353-550411C	c23998/f1p0/2632,c8846/f1p0/2166
chr13	Alternative 3' splice site	548887	548004	-	chr13:546353-550411C	c8846/f1p0/2166,c17735/f1p1/1839
chr13	Intron retention	5656478	5657461	+	chr13:5654917-5659724W	c32657/f1p0/2761,c14905/f1p1/1783,c7280/f1p1/1950
chr13	Intron retention	5656478	5658348	+	chr13:5654917-5659724W	c60237/f1p1/3369,c14905/f1p1/1783,c7280/f1p1/1950
chr13	Intron retention	5657623	5658348	+	chr13:5654917-5659724W	c60237/f1p1/3369,c32657/f1p0/2761
chr13	Exon skipping	5687010	5686703	-	chr13:5684209-5690335C	c16713/f1p1/1561,c1925/f4p1/1869,c6539/f1p0/2110
chr13	Intron retention	5754030	5754477	+	chr13:5750491-5755658W	c10643/f1p2/1480,c22542/f2p3/1152,c8484/f13p3/1142
chr13	Intron retention	5832055	5832879	+	chr13:5829011-5833771W	c29649/f1p0/2707,c10182/f1p0/1943,c5999/f1p0/1934,c6463/f3p0/1938
chr13	Intron retention	6382272	6382665	+	chr13:6379759-6385863W	c50674/f1p2/3730,c27270/f1p2/2912,c36577/f1p1/2958
chr13	Intron retention	6388131	6387991	-	chr13:6387079-6389463C	c9442/f1p0/1666,c19670/f1p0/1531
chr13	Intron retention	6388898	6388811	-	chr13:6387079-6389463C	c9442/f1p0/1666,c19670/f1p0/1531
chr13	Intron retention	6551182	6551506	+	chr13:6529040-6554962W	c54279/f1p0/3666,c45017/f1p0/3510,c58454/f1p0/3108
chr13	Alternative 3' splice site	6551506	6551512	+	chr13:6529040-6554962W	c41690/f1p0/3838,c59061/f2p0/3671
chr13	Intron retention	6552083	6552380	+	chr13:6529040-6554962W	c51746/f1p0/3599,c22880/f2p1/3267
chr13	Intron retention	6552083	6552376	+	chr13:6529040-6554962W	c51746/f1p0/3599,c27488/f1p0/3012,c31132/f1p1/3125,c33087/f1p0/2818,c34418/f1p1/2846,c38549/f2p0/3288,c45017/f1p0/3510,c58454/f1p0/3108
chr13	Intron retention	6552083	6552515	+	chr13:6529040-6554962W	c41690/f1p0/3838,c22880/f2p1/3267
chr13	Intron retention	6552083	6552376	+	chr13:6529040-6554962W	c41690/f1p0/3838,c16584/f1p0/3164,c33276/f1p0/3308,c38648/f1p0/3699.1,c39675/f2p1/3429,c41123/f1p0/3339
chr13	Intron retention	6552083	6552515	+	chr13:6529040-6554962W	c41690/f1p0/3838,c27488/f1p0/3012,c31132/f1p1/3125,c33087/f1p0/2818,c34418/f1p1/2846,c38549/f2p0/3288,c45017/f1p0/3510,c58454/f1p0/3108
chr13	Intron retention	6552083	6553589	+	chr13:6529040-6554962W	c57280/f1p1/3842,c31132/f1p1/3125
chr13	Alternative 3' splice site	6552376	6552380	+	chr13:6529040-6554962W	c27488/f1p0/3012,c27720/f1p0/2848,c31132/f1p1/3125,c33087/f1p0/2818,c34418/f1p1/2846,c35123/f1p1/2991,c38549/f2p0/3288,c45017/f1p0/3510,c50306/f1p3/3380,c58454/f1p0/3108,c22880/f2p1/3267
chr13	Intron retention	6552423	6552515	+	chr13:6529040-6554962W	c16584/f1p0/3164,c33276/f1p0/3308,c38648/f1p0/3699.1,c39675/f2p1/3429,c41123/f1p0/3339,c54279/f1p0/3666,c27488/f1p0/3012,c31132/f1p1/3125,c33087/f1p0/2818,c34418/f1p1/2846,c35123/f1p1/2991,c38549/f2p0/3288,c45017/f1p0/3510,c50306/f1p3/3380,c58454/f1p0/3108
chr13	Intron retention	6552423	6552483	+	chr13:6529040-6554962W	c16584/f1p0/3164,c33276/f1p0/3308,c38648/f1p0/3699.1,c39675/f2p1/3429,c41123/f1p0/3339,c54279/f1p0/3666,c27720/f1p0/2848
chr13	Intron retention	6552423	6552515	+	chr13:6529040-6554962W	c41690/f1p0/3838,c51746/f1p0/3599
chr13	Alternative 3' splice site	6552483	6552515	+	chr13:6529040-6554962W	c27720/f1p0/2848,c22880/f2p1/3267,c27488/f1p0/3012,c31132/f1p1/3125,c33087/f1p0/2818,c34418/f1p1/2846,c35123/f1p1/2991,c38549/f2p0/3288,c45017/f1p0/3510,c50306/f1p3/3380,c51746/f1p0/3599,c58454/f1p0/3108
chr13	Intron retention	6553662	6553769	+	chr13:6529040-6554962W	c16584/f1p0/3164,c58454/f1p0/3108
chr13	Intron retention	6553662	6553769	+	chr13:6529040-6554962W	c33276/f1p0/3308,c39675/f2p1/3429,c22880/f2p1/3267
chr13	Intron retention	6553662	6553769	+	chr13:6529040-6554962W	c31132/f1p1/3125,c50306/f1p3/3380,c54279/f1p0/3666
chr13	Intron retention	6602014	6602697	+	chr13:6600611-6605917W	c32300/f1p0/2769,c3296/f1p0/1948,c4642/f1p0/2134
chr13	Intron retention	6956982	6956696	-	chr13:6955402-6986847C	c4317/f1p0/2038,c46259/f1p0/3821.1,c5650/f1p0/2298,c8184/f1p2/1712
chr13	Mutually exclusive exon	6984102	6957355	-	chr13:6955402-6986847C	c5650/f1p0/2298,c8184/f1p2/1712,c4317/f1p0/2038
chr13	Intron retention	7155306	7155538	+	chr13:7153591-7159244W	c34173/f1p0/2906.1,c11515/f1p1/2006,c32786/f2p3/2288,c3541/f1p4/2156,c4329/f2p3/2346
chr13	Exon skipping	7155831	7155983	+	chr13:7153591-7159244W	c11515/f1p1/2006,c32786/f2p3/2288,c34173/f1p0/2906.1,c3541/f1p4/2156,c4329/f2p3/2346
chr13	Intron retention	7448547	7448088	-	chr13:7445703-7449102C	c20627/f1p0/1668,c24176/f1p0/1223
chr13	Alternative 5' splice site	7842209	7842173	-	chr13:7758880-7845544C	c4972/f1p0/1834,c10516/f1p0/1780,c5989/f1p0/1724,c7755/f1p0/1781
chr13	Intron retention	7901757	7901538	-	chr13:7899245-7903761C	c5153/f1p1/2193,c6947/f1p1/1954
chr13	Alternative 3' splice site	8001221	8001224	+	chr13:7999893-8003167W	c1570/f3p0/1992,c9101/f1p0/1997,c19879/f1p0/1997
chr13	Alternative 3' splice site	8014357	8014374	+	chr13:8008478-8015513W	c41106/f1p0/3152,c30328/f1p0/2662,c34674/f1p0/3199.1,c45438/f1p0/2748,c47646/f1p0/3146
chr13	Intron retention	8284825	8285190	+	chr13:8284514-8287316W	c4645/f1p0/1880,c27940/f1p0/1387
chr13	Alternative 5' splice site	8511662	8511680	+	chr13:8509183-8514207W	c5015/f1p0/1949,c28772/f1p0/2574.2
chr13	Alternative 5' splice site	851906	851911	+	chr13:851157-866058W	c13123/f2p0/1973,c2199/f2p0/2091,c4973/f1p0/2223,c18065/f1p0/1892
chr13	Intron retention	852925	853341	+	chr13:851157-866058W	c29201/f1p0/2708,c4973/f1p0/2223,c13123/f2p0/1973,c18065/f1p0/1892,c2199/f2p0/2091
chr13	Alternative 3' splice site	8905338	8905285	-	chr13:8901873-8906640C	c27543/f1p0/2870,c7743/f1p0/2407,c44620/f1p0/3243.1,c9062/f1p0/2286
chr13	Intron retention	8906320	8905843	-	chr13:8901873-8906640C	c27543/f1p0/2870,c44620/f1p0/3243.1,c7743/f1p0/2407,c9062/f1p0/2286
chr13	Intron retention	9067429	9067497	+	chr13:9064547-9071895W	c37875/f5p9/3924,c42851/f1p1/3723,c43990/f1p8/3803,c50445/f1p2/3728,c63467/f1p0/3928,c61655/f1p0/3849
chr13	Alternative 5' splice site	9070009	9070040	+	chr13:9064547-9071895W	c37875/f5p9/3924,c38820/f5p1/3844,c42851/f1p1/3723,c43990/f1p8/3803,c51402/f1p0/3693,c50445/f1p2/3728,c61655/f1p0/3849,c63467/f1p0/3928
chr13	Alternative 5' splice site	9070009	9070040	+	chr13:9066634-9072375W	c12355/f1p0/1894,c17188/f1p0/3115,c31811/f1p1/2992,c32280/f1p0/3030,c37877/f10p12/3773,c40253/f1p5/3881,c45419/f4p4/3739,c50305/f2p3/3864,c53409/f1p0/3786,c57342/f5p16/3942,c62540/f1p0/4618,c59203/f1p3/3720,c62495/f2p3/3910
chr13	Intron retention	9070009	9070462	+	chr13:9066634-9072375W	c40802/f1p0/4239,c12355/f1p0/1894,c17188/f1p0/3115,c31811/f1p1/2992,c32280/f1p0/3030,c37877/f10p12/3773,c40253/f1p5/3881,c45419/f4p4/3739,c50305/f2p3/3864,c57342/f5p16/3942,c62540/f1p0/4618
chr13	Intron retention	9070040	9070462	+	chr13:9066634-9072375W	c40802/f1p0/4239,c59203/f1p3/3720,c62495/f2p3/3910
chr13	Mutually exclusive exon	9950112	9949367	-	chr13:9943222-9953680C	c23552/f3p1/2821,c24033/f1p0/3751.1
chr14	Alternative 3' splice site	1004895	1004834	-	chr14:1002551-1007717C	c35129/f1p0/2957,c15914/f1p0/2705,c24191/f1p1/2726
chr14	Alternative 3' splice site	1006341	1006323	-	chr14:1002551-1007717C	c15914/f1p0/2705,c35129/f1p0/2957,c24191/f1p1/2726
chr14	Intron retention	10052382	10052290	-	chr14:10049107-10055922C	c24086/f3p0/3134,c30561/f1p0/3037,c62034/f1p0/3882,c16855/f1p0/2673,c17812/f5p3/3096,c18793/f1p0/3203,c31483/f1p0/3086,c32921/f2p3/2971,c36086/f2p0/3182,c41739/f1p0/3030,c53954/f1p0/3566
chr14	Intron retention	10053281	10053070	-	chr14:10049107-10055922C	c18793/f1p0/3203,c17812/f5p3/3096,c24086/f3p0/3134,c30561/f1p0/3037,c31483/f1p0/3086,c32921/f2p3/2971,c36086/f2p0/3182,c41739/f1p0/3030,c53954/f1p0/3566,c62034/f1p0/3882
chr14	Intron retention	1056865	1056946	+	chr14:1056821-1064048W	c27628/f1p13/3280,c31426/f1p0/4046.2,c23835/f1p3/3253,c50952/f1p0/3287
chr14	Intron retention	1056865	1057002	+	chr14:1056821-1064048W	c27628/f1p13/3280,c31426/f1p0/4046.2,c38513/f2p5/3226,c45960/f1p0/2903
chr14	Intron retention	1056865	1056946	+	chr14:1056821-1064048W	c13598/f8p13/3164,c43119/f1p14/3320
chr14	Intron retention	1056865	1057002	+	chr14:1056821-1064048W	c13598/f8p13/3164,c26752/f5p5/3009
chr14	Alternative 3' splice site	1056946	1057002	+	chr14:1056821-1064048W	c15953/f1p0/3033,c23835/f1p3/3253,c43119/f1p14/3320,c50952/f1p0/3287,c19126/f1p3/3070,c26752/f5p5/3009,c30829/f1p0/3278,c38513/f2p5/3226,c45960/f1p0/2903
chr14	Intron retention	11067572	11068510	+	chr14:11064143-11069566W	c24005/f1p0/3038,c40535/f1p0/3051,c41940/f1p0/3756
chr14	Exon skipping	11750178	11750313	+	chr14:11745925-11754670W	c4096/f1p0/2311.2,c5080/f1p0/1957
chr14	Mutually exclusive exon	12553029	12543478	-	chr14:12542840-12569526C	c42212/f1p0/2749,c49984/f2p0/3978,c62180/f1p0/3944
chr14	Alternative 3' splice site	13581640	13581646	+	chr14:13580669-13591901W	c17800/f2p0/3047,c25270/f1p3/3371,c26449/f2p4/3290,c38785/f1p3/3397,c40516/f1p2/3509
chr14	Alternative 5' splice site	13588936	13588937	+	chr14:13580669-13591901W	c26449/f2p4/3290,c25270/f1p3/3371
chr14	Alternative 3' splice site	14052372	14052461	+	chr14:14050324-14054708W	c21443/f1p0/5149.1,c22241/f1p1/3329,c29712/f1p0/2758.1,c2991/f3p2/2417,c39458/f1p3/2921,c43419/f1p1/2677,c4347/f3p2/2305,c60764/f1p0/3943.1,c7354/f1p0/1833,c9314/f1p0/1961,c23365/f1p0/1818
chr14	Intron retention	14052848	14053142	+	chr14:14050324-14054708W	c60764/f1p0/3943.1,c12628/f1p0/1664,c21443/f1p0/5149.1,c22241/f1p1/3329,c23365/f1p0/1818,c29712/f1p0/2758.1,c2991/f3p2/2417,c39458/f1p3/2921,c43419/f1p1/2677,c4347/f3p2/2305,c7354/f1p0/1833,c9314/f1p0/1961
chr14	Intron retention	14359966	14359878	-	chr14:14359114-14361775C	c2853/f1p1/1983,c12559/f1p0/1895
chr14	Alternative 5' splice site	14360022	14359966	-	chr14:14359114-14361775C	c13037/f1p0/1933,c1622/f4p3/1872,c1952/f1p1/1935,c23819/f7p4/1859,c12559/f1p0/1895
chr14	Intron retention	14360377	14360103	-	chr14:14359114-14361775C	c11433/f1p1/2134,c1622/f4p3/1872,c23819/f7p4/1859
chr14	Intron retention	14360669	14360584	-	chr14:14359114-14361775C	c13037/f1p0/1933,c1952/f1p1/1935,c12559/f1p0/1895,c1622/f4p3/1872,c23819/f7p4/1859,c2853/f1p1/1983
chr14	Intron retention	145346	145734	+	chr14:144541-148289W	c31906/f1p0/2805,c31135/f1p0/3168,c33190/f1p0/2349
chr14	Alternative 3' splice site	146211	146221	+	chr14:144541-148289W	c31135/f1p0/3168,c31906/f1p0/2805,c33190/f1p0/2349
chr14	Intron retention	14791785	14791984	+	chr14:14788440-14792655W	c5031/f1p0/1843,c25328/f1p0/1752
chr14	Intron retention	1507703	1507622	-	chr14:1504328-1509096C	c29042/f1p0/2732.2,c13228/f10p0/1797,c27893/f1p1/2794.2,c2838/f1p1/1826,c37370/f5p2/1764
chr14	Intron retention	1508868	1507795	-	chr14:1504328-1509096C	c38590/f2p1/2816,c27893/f1p1/2794.2
chr14	Alternative 5' splice site	1528014	1528018	+	chr14:1522728-1529853W	c4753/f1p0/1957,c5217/f1p0/1982
chr14	Intron retention	1528542	1528684	+	chr14:1522728-1529853W	c5217/f1p0/1982,c4753/f1p0/1957
chr14	Exon skipping	1528917	1528976	+	chr14:1522728-1529853W	c5217/f1p0/1982,c4753/f1p0/1957
chr14	Intron retention	15315751	15316001	+	chr14:15313433-15317664W	c18606/f1p0/2863,c11206/f1p0/2120,c12139/f1p0/2062.1,c8116/f1p1/2013
chr14	Intron retention	15316601	15317388	+	chr14:15313433-15317664W	c18606/f1p0/2863,c12139/f1p0/2062.2
chr14	Intron retention	155272	157243	+	chr14:154554-159100W	c60407/f1p0/3889,c2890/f1p5/1739
chr14	Intron retention	157443	158486	+	chr14:154554-159100W	c38972/f1p0/4392,c291/f10p4/1880
chr14	Intron retention	15802017	15802148	+	chr14:15801484-15804450W	c33067/f1p0/3014,c13916/f5p2/2849
chr14	Intron retention	164026	163908	-	chr14:161215-173133C	c35855/f1p1/3108,c50516/f1p0/4049,c53601/f1p0/3855,c54031/f1p0/4515.2,c57536/f1p2/3756,c59693/f1p0/4161,c63798/f4p5/4114,c54170/f1p0/3937
chr14	Exon skipping	165684	165311	-	chr14:161215-173133C	c53601/f1p0/3855,c35855/f1p1/3108,c50516/f1p0/4049,c54170/f1p0/3937,c57536/f1p2/3756,c59693/f1p0/4161,c63798/f4p5/4114
chr14	Alternative 3' splice site	168088	168002	-	chr14:161215-173133C	c35855/f1p1/3108,c54170/f1p0/3937,c57536/f1p2/3756,c63798/f4p5/4114,c50516/f1p0/4049
chr14	Intron retention	168164	168088	-	chr14:161215-173133C	c53601/f1p0/3855,c59693/f1p0/4161,c35855/f1p1/3108,c54170/f1p0/3937,c57536/f1p2/3756,c63798/f4p5/4114
chr14	Intron retention	168164	168002	-	chr14:161215-173133C	c53601/f1p0/3855,c59693/f1p0/4161,c50516/f1p0/4049
chr14	Alternative 3' splice site	168641	168636	-	chr14:161215-173133C	c53601/f1p0/3855,c35855/f1p1/3108,c50516/f1p0/4049,c54170/f1p0/3937,c57536/f1p2/3756,c59693/f1p0/4161,c63798/f4p5/4114
chr14	Intron retention	164026	163908	-	chr14:161657-173133C	c50410/f1p4/3811,c50556/f1p0/4123
chr14	Intron retention	168164	168088	-	chr14:161657-173133C	c50556/f1p0/4123,c20228/f2p1/3031,c50410/f1p4/3811
chr14	Alternative 3' splice site	16433209	16433249	+	chr14:16432244-16436182W	c3749/f1p0/1990,c3703/f1p0/2248
chr14	Alternative 5' splice site	1650116	1650047	-	chr14:1647890-1744967C	c7458/f1p0/1969,c7590/f1p1/2098
chr14	Intron retention	1662176	1661898	-	chr14:1647890-1744967C	c34303/f1p0/2899.3,c28478/f1p0/1693
chr14	Intron retention	168164	168088	-	chr14:165324-173133C	c52713/f1p0/3380.1,c54031/f1p0/4515.1
chr14	Alternative 3' splice site	16757388	16757394	+	chr14:16755035-16759401W	c10852/f1p0/2314,c21353/f1p0/3175
chr14	Exon skipping	17002655	17002563	-	chr14:17001551-17006155C	c5610/f1p0/1569,c454/f16p2/1714
chr14	Intron retention	17127223	17127311	+	chr14:17115944-17397785W	c22042/f1p2/3189,c16557/f5p2/3124,c16930/f1p0/3057,c27223/f1p0/3217,c29324/f1p1/2953,c32089/f1p1/3009,c32507/f1p0/3001,c33944/f3p1/2990,c33978/f1p0/3167,c34901/f1p2/3050,c35414/f1p0/3319.1,c36314/f1p0/2970,c36507/f1p0/2901,c53331/f1p2/3327
chr14	Mutually exclusive exon	17127629	17157086	+	chr14:17115944-17397785W	c22042/f1p2/3189,c27223/f1p0/3217,c29324/f1p1/2953,c34901/f1p2/3050,c16557/f5p2/3124,c16930/f1p0/3057,c22294/f1p0/2961,c32089/f1p1/3009,c33944/f3p1/2990,c33978/f1p0/3167,c35414/f1p0/3319.1,c36314/f1p0/2970,c36507/f1p0/2901,c40758/f1p0/2950.1,c53331/f1p2/3327
chr14	Alternative 3' splice site	17157176	17157202	+	chr14:17115944-17397785W	c16557/f5p2/3124,c16930/f1p0/3057,c17668/f1p0/3041,c21450/f1p0/3266,c22294/f1p0/2961,c24365/f1p0/2745.1,c31111/f1p0/3580,c32089/f1p1/3009,c33944/f3p1/2990,c33978/f1p0/3167,c35414/f1p0/3319.1,c36314/f1p0/2970,c36507/f1p0/2901,c36667/f1p0/2767,c40758/f1p0/2950.1,c46257/f1p1/3106,c50821/f1p1/3296,c53331/f1p2/3327,c32507/f1p0/3001
chr14	Intron retention	17158033	17158194	+	chr14:17115944-17397785W	c21450/f1p0/3266,c53331/f1p2/3327,c16557/f5p2/3124,c17668/f1p0/3041,c22042/f1p2/3189,c22294/f1p0/2961,c22758/f1p1/2908,c24365/f1p0/2745.1,c27223/f1p0/3217,c29324/f1p1/2953,c31111/f1p0/3580,c32089/f1p1/3009,c32507/f1p0/3001,c33944/f3p1/2990,c33978/f1p0/3167,c34901/f1p2/3050,c35414/f1p0/3319.1,c36314/f1p0/2970,c36507/f1p0/2901,c36667/f1p0/2767,c40758/f1p0/2950.1,c46257/f1p1/3106,c50821/f1p1/3296
chr14	Alternative 5' splice site	17158033	17158262	+	chr14:17115944-17397785W	c16930/f1p0/3057,c21450/f1p0/3266,c53331/f1p2/3327
chr14	Exon skipping	17158194	17158262	+	chr14:17115944-17397785W	c16930/f1p0/3057,c16557/f5p2/3124,c17668/f1p0/3041,c22042/f1p2/3189,c22294/f1p0/2961,c22758/f1p1/2908,c24365/f1p0/2745.1,c27223/f1p0/3217,c29324/f1p1/2953,c31111/f1p0/3580,c32089/f1p1/3009,c32507/f1p0/3001,c33944/f3p1/2990,c33978/f1p0/3167,c34901/f1p2/3050,c35414/f1p0/3319.1,c36314/f1p0/2970,c36507/f1p0/2901,c36667/f1p0/2767,c40758/f1p0/2950.1,c46257/f1p1/3106,c50821/f1p1/3296
chr14	Intron retention	17158499	17158605	+	chr14:17115944-17397785W	c27223/f1p0/3217,c33978/f1p0/3167,c35414/f1p0/3319.1,c46257/f1p1/3106,c53331/f1p2/3327,c16557/f5p2/3124,c16930/f1p0/3057,c17668/f1p0/3041,c21450/f1p0/3266,c22042/f1p2/3189,c22294/f1p0/2961,c22758/f1p1/2908,c24365/f1p0/2745.1,c29324/f1p1/2953,c31111/f1p0/3580,c32089/f1p1/3009,c32507/f1p0/3001,c33944/f3p1/2990,c34901/f1p2/3050,c36314/f1p0/2970,c36507/f1p0/2901,c36667/f1p0/2767,c40758/f1p0/2950.1,c5…
chr14	Alternative 3' splice site	17160057	17160145	+	chr14:17115944-17397785W	c11745/f1p0/1911,c16557/f5p2/3124,c16930/f1p0/3057,c21450/f1p0/3266,c22042/f1p2/3189,c22294/f1p0/2961,c24365/f1p0/2745.1,c27223/f1p0/3217,c31111/f1p0/3580,c32089/f1p1/3009,c32507/f1p0/3001,c33944/f3p1/2990,c33978/f1p0/3167,c34901/f1p2/3050,c35414/f1p0/3319.1,c36314/f1p0/2970,c36667/f1p0/2767,c40758/f1p0/2950.1,c50821/f1p1/3296,c53331/f1p2/3327,c17668/f1p0/3041,c22758/f1p1/2908,c29324/f1p1/2953,c3…
chr14	Mutually exclusive exon	17177960	17184453	+	chr14:17115944-17397785W	c15120/f1p0/2895,c16411/f1p0/3221,c28690/f1p0/2877,c28923/f1p0/3175,c38695/f1p0/3796,c40060/f1p1/3382,c45197/f1p0/3333,c50177/f1p0/3538.1,c60345/f1p0/3550
chr14	Mutually exclusive exon	17184276	17258902	+	chr14:17115944-17397785W	c62905/f1p0/3639,c61601/f1p0/3613
chr14	Intron retention	17190819	17190985	+	chr14:17115944-17397785W	c36143/f1p0/3301,c26998/f2p0/3153,c33894/f1p0/3176
chr14	Alternative 3' splice site	17192875	17192918	+	chr14:17115944-17397785W	c16557/f5p2/3124,c22294/f1p0/2961,c40758/f1p0/2950.1,c29324/f1p1/2953
chr14	Mutually exclusive exon	17192918	17252644	+	chr14:17115944-17397785W	c29324/f1p1/2953,c11745/f1p0/1911,c16930/f1p0/3057,c22758/f1p1/2908,c32089/f1p1/3009,c32507/f1p0/3001,c33944/f3p1/2990,c33978/f1p0/3167,c34901/f1p2/3050
chr14	Mutually exclusive exon	17192918	17252644	+	chr14:17115944-17397785W	c29324/f1p1/2953,c24365/f1p0/2745.1,c27223/f1p0/3217,c36314/f1p0/2970,c36507/f1p0/2901,c36667/f1p0/2767,c53331/f1p2/3327
chr14	Intron retention	17193690	17193790	+	chr14:17115944-17397785W	c33894/f1p0/3176,c26998/f2p0/3153,c36143/f1p0/3301
chr14	Exon skipping	17214213	17214284	+	chr14:17115944-17397785W	c38695/f1p0/3796,c15120/f1p0/2895,c16411/f1p0/3221,c28923/f1p0/3175,c40060/f1p1/3382,c45197/f1p0/3333,c46872/f1p0/3832,c50177/f1p0/3538.1,c59880/f1p0/3922,c60345/f1p0/3550
chr14	Mutually exclusive exon	17214405	17333062	+	chr14:17115944-17397785W	c16411/f1p0/3221,c50177/f1p0/3538.1,c28690/f1p0/2877
chr14	Intron retention	17214800	17214914	+	chr14:17115944-17397785W	c28923/f1p0/3175,c15120/f1p0/2895,c40060/f1p1/3382,c45197/f1p0/3333,c59880/f1p0/3922
chr14	Alternative 5' splice site	17214800	17214985	+	chr14:17115944-17397785W	c38695/f1p0/3796,c28923/f1p0/3175
chr14	Intron retention	17214800	17215091	+	chr14:17115944-17397785W	c46872/f1p0/3832,c40060/f1p1/3382,c45197/f1p0/3333
chr14	Exon skipping	17214914	17214985	+	chr14:17115944-17397785W	c38695/f1p0/3796,c40060/f1p1/3382,c45197/f1p0/3333,c59880/f1p0/3922
chr14	Intron retention	17214985	17215091	+	chr14:17115944-17397785W	c46872/f1p0/3832,c28923/f1p0/3175
chr14	Intron retention	17215151	17215444	+	chr14:17115944-17397785W	c38695/f1p0/3796,c59880/f1p0/3922
chr14	Intron retention	17216008	17216100	+	chr14:17115944-17397785W	c46872/f1p0/3832,c59880/f1p0/3922
chr14	Intron retention	17216283	17216416	+	chr14:17115944-17397785W	c46872/f1p0/3832,c59880/f1p0/3922
chr14	Intron retention	17217315	17217485	+	chr14:17115944-17397785W	c46872/f1p0/3832,c59880/f1p0/3922
chr14	Mutually exclusive exon	17290735	17316752	+	chr14:17115944-17397785W	c62905/f1p0/3639,c61601/f1p0/3613
chr14	Mutually exclusive exon	17308955	17367359	+	chr14:17115944-17397785W	c11745/f1p0/1911,c16930/f1p0/3057,c29324/f1p1/2953,c32089/f1p1/3009,c32507/f1p0/3001,c33978/f1p0/3167,c34901/f1p2/3050,c36507/f1p0/2901,c36667/f1p0/2767,c22758/f1p1/2908,c36314/f1p0/2970
chr14	Alternative 3' splice site	17332626	17332642	+	chr14:17115944-17397785W	c62905/f1p0/3639,c61601/f1p0/3613
chr14	Alternative 5' splice site	17363366	17363555	+	chr14:17115944-17397785W	c50177/f1p0/3538.1,c16411/f1p0/3221
chr14	Intron retention	17363370	17363484	+	chr14:17115944-17397785W	c16411/f1p0/3221,c28690/f1p0/2877
chr14	Alternative 3' splice site	17365068	17365365	+	chr14:17115944-17397785W	c16411/f1p0/3221,c50177/f1p0/3538.1,c15120/f1p0/2895,c28690/f1p0/2877
chr14	Intron retention	17395506	17395594	+	chr14:17115944-17397785W	c38695/f1p0/3796,c40060/f1p1/3382,c60345/f1p0/3550
chr14	Intron retention	17396343	17396500	+	chr14:17115944-17397785W	c38695/f1p0/3796,c60345/f1p0/3550,c40060/f1p1/3382
chr14	Alternative 3' splice site	17201102	17201115	+	chr14:17198170-17397788W	c23646/f1p0/3162,c18646/f2p1/3271,c29430/f1p1/3231,c32328/f1p0/3263,c32687/f1p0/2797,c35489/f1p0/3060,c38514/f2p2/3121
chr14	Intron retention	17216983	17217485	+	chr14:17198170-17397788W	c53659/f1p0/3794.1,c56659/f1p0/3409.1
chr14	Intron retention	17217921	17218078	+	chr14:17198170-17397788W	c51836/f1p0/5350.1,c53659/f1p0/3794.1,c56659/f1p0/3409.1
chr14	Intron retention	17347628	17347729	+	chr14:17198170-17397788W	c32328/f1p0/3263,c18646/f2p1/3271,c29430/f1p1/3231,c32687/f1p0/2797,c35489/f1p0/3060,c38514/f2p2/3121,c62410/f1p1/3778.1
chr14	Intron retention	17347628	17347729	+	chr14:17198170-17397788W	c39602/f1p0/2887,c40024/f1p1/3277,c23646/f1p0/3162
chr14	Intron retention	17347628	17347853	+	chr14:17198170-17397788W	c39602/f1p0/2887,c40024/f1p1/3277,c18646/f2p1/3271,c29430/f1p1/3231,c35489/f1p0/3060,c38514/f2p2/3121,c62410/f1p1/3778.1
chr14	Intron retention	17347628	17348162	+	chr14:17198170-17397788W	c39602/f1p0/2887,c40024/f1p1/3277,c32687/f1p0/2797
chr14	Intron retention	17347763	17347853	+	chr14:17198170-17397788W	c23646/f1p0/3162,c18646/f2p1/3271,c29430/f1p1/3231,c35489/f1p0/3060,c38514/f2p2/3121,c62410/f1p1/3778.1
chr14	Intron retention	17347763	17348162	+	chr14:17198170-17397788W	c23646/f1p0/3162,c32687/f1p0/2797
chr14	Intron retention	17347763	17347853	+	chr14:17198170-17397788W	c39602/f1p0/2887,c40024/f1p1/3277,c32328/f1p0/3263
chr14	Alternative 3' splice site	17347853	17348162	+	chr14:17198170-17397788W	c18646/f2p1/3271,c29430/f1p1/3231,c32328/f1p0/3263,c35489/f1p0/3060,c38514/f2p2/3121,c62410/f1p1/3778.1,c32687/f1p0/2797
chr14	Intron retention	17348510	17348668	+	chr14:17198170-17397788W	c53814/f1p0/3761,c18646/f2p1/3271,c23646/f1p0/3162,c29430/f1p1/3231,c32328/f1p0/3263,c32687/f1p0/2797,c35489/f1p0/3060,c38514/f2p2/3121,c39602/f1p0/2887,c40024/f1p1/3277,c62410/f1p1/3778.1
chr14	Intron retention	17362815	17362964	+	chr14:17198170-17397788W	c39493/f1p0/3370,c60729/f1p0/3953.1,c30100/f1p0/3105,c42513/f1p1/3075,c45331/f1p0/2970
chr14	Intron retention	17363370	17363484	+	chr14:17198170-17397788W	c42513/f1p1/3075,c53105/f1p0/3873.2,c60729/f1p0/3953.1,c17454/f1p0/3469.1,c17456/f1p1/3495.1,c30100/f1p0/3105,c39493/f1p0/3370,c45331/f1p0/2970
chr14	Intron retention	17364189	17364590	+	chr14:17198170-17397788W	c42513/f1p1/3075,c17454/f1p0/3469.1,c30100/f1p0/3105,c39493/f1p0/3370,c45331/f1p0/2970,c57521/f1p0/3917.1,c60729/f1p0/3953.1,c60797/f1p0/3713.1
chr14	Intron retention	17364455	17364750	+	chr14:17198170-17397788W	c17456/f1p1/3495.1,c17454/f1p0/3469.1,c30100/f1p0/3105,c39493/f1p0/3370,c45331/f1p0/2970,c57521/f1p0/3917.1,c60729/f1p0/3953.1,c60797/f1p0/3713.1
chr14	Intron retention	17364455	17364590	+	chr14:17198170-17397788W	c17456/f1p1/3495.1,c53105/f1p0/3873.1
chr14	Intron retention	17364658	17364750	+	chr14:17198170-17397788W	c53105/f1p0/3873.1,c17454/f1p0/3469.1,c30100/f1p0/3105,c39493/f1p0/3370,c45331/f1p0/2970,c57521/f1p0/3917.1,c60729/f1p0/3953.1,c60797/f1p0/3713.1
chr14	Intron retention	17365255	17365365	+	chr14:17198170-17397788W	c17454/f1p0/3469.1,c17456/f1p1/3495.1,c30100/f1p0/3105,c39493/f1p0/3370,c42513/f1p1/3075,c53105/f1p0/3873.1,c57521/f1p0/3917.1,c60729/f1p0/3953.1,c60797/f1p0/3713.1,c45331/f1p0/2970
chr14	Intron retention	17366285	17366740	+	chr14:17198170-17397788W	c51230/f1p0/4002.2,c17454/f1p0/3469.1
chr14	Intron retention	17366285	17366740	+	chr14:17198170-17397788W	c57521/f1p0/3917.1,c30100/f1p0/3105,c60797/f1p0/3713.1
chr14	Alternative 3' splice site	17366395	17366503	+	chr14:17198170-17397788W	c30100/f1p0/3105,c39493/f1p0/3370,c45331/f1p0/2970,c60729/f1p0/3953.1,c60797/f1p0/3713.1,c17454/f1p0/3469.1
chr14	Alternative 3' splice site	17366730	17366740	+	chr14:17198170-17397788W	c39493/f1p0/3370,c45331/f1p0/2970,c60729/f1p0/3953.1
chr14	Intron retention	17395506	17395594	+	chr14:17198170-17397788W	c56934/f1p0/3631.1,c17456/f1p1/3495.1
chr14	Intron retention	17395506	17395907	+	chr14:17198170-17397788W	c53105/f1p0/3873.1,c42513/f1p1/3075
chr14	Intron retention	1747457	1747441	-	chr14:1745293-1748346C	c10696/f1p1/1540,c17845/f1p1/1687,c5721/f1p0/1726,c18785/f1p0/1653
chr14	Alternative 3' splice site	1747476	1747473	-	chr14:1745293-1748346C	c17252/f1p0/1656,c18785/f1p0/1653
chr14	Intron retention	1752010	1751403	-	chr14:1748969-1756079C	c17166/f1p0/3248.1,c5627/f1p0/2272
chr14	Intron retention	1752363	1752061	-	chr14:1748969-1756079C	c46050/f1p0/3090,c17166/f1p0/3248.1
chr14	Intron retention	1752363	1751403	-	chr14:1748969-1756079C	c46050/f1p0/3090,c5627/f1p0/2272
chr14	Intron retention	1753227	1753128	-	chr14:1748969-1756079C	c17166/f1p0/3248.1,c46050/f1p0/3090,c5627/f1p0/2272
chr14	Alternative 5' splice site	18262586	18262587	+	chr14:18260078-18265606W	c34802/f2p3/2964,c18960/f1p0/3036.1,c19421/f2p1/2657,c23700/f1p0/2935,c26249/f8p2/2925,c32379/f1p2/2954,c33138/f2p3/2808,c33847/f1p0/2766,c37002/f3p10/3127,c42677/f1p4/2766,c48874/f7p9/2864,c49020/f40p9/3005
chr14	Intron retention	18263153	18263258	+	chr14:18260078-18265606W	c33847/f1p0/2766,c18960/f1p0/3036.1,c19421/f2p1/2657,c23700/f1p0/2935,c25339/f1p0/3493.1,c26249/f8p2/2925,c32379/f1p2/2954,c33138/f2p3/2808,c34802/f2p3/2964,c37002/f3p10/3127,c42677/f1p4/2766,c48874/f7p9/2864,c49020/f40p9/3005
chr14	Intron retention	18263625	18263717	+	chr14:18260078-18265606W	c23700/f1p0/2935,c18960/f1p0/3036.1,c19421/f2p1/2657,c25339/f1p0/3493.1,c26249/f8p2/2925,c32379/f1p2/2954,c33138/f2p3/2808,c33847/f1p0/2766,c34802/f2p3/2964,c37002/f3p10/3127,c42677/f1p4/2766,c48874/f7p9/2864,c49020/f40p9/3005
chr14	Intron retention	18301544	18301123	-	chr14:18300499-18315089C	c29253/f1p1/2954,c33048/f1p1/2775.1,c19358/f1p0/1646.1
chr14	Alternative 3' splice site	18365045	18365020	-	chr14:18363255-18368693C	c2395/f2p0/1847,c23741/f1p0/1993,c9675/f1p0/1809
chr14	Alternative 3' splice site	1849017	1849022	+	chr14:1841499-1852727W	c32274/f1p0/3550,c41091/f1p0/3246,c55145/f1p0/3506,c60083/f1p2/4025,c52875/f1p2/3492,c61539/f1p1/3647
chr14	Alternative 5' splice site	186469	186468	-	chr14:184339-189865C	c64081/f1p2/3803,c39749/f1p0/3947,c43974/f3p9/3659,c45749/f5p11/4002,c52129/f1p0/3669,c53952/f1p0/3792.1,c55445/f1p4/3866,c58993/f3p8/3878,c62740/f1p0/3690,c63749/f7p10/3714
chr14	Intron retention	186824	186600	-	chr14:184339-189865C	c61978/f1p0/3814,c39749/f1p0/3947,c43974/f3p9/3659,c45749/f5p11/4002,c52129/f1p0/3669,c53952/f1p0/3792.1,c55445/f1p4/3866,c58993/f3p8/3878,c62740/f1p0/3690,c63749/f7p10/3714
chr14	Intron retention	187760	187661	-	chr14:184339-189865C	c39749/f1p0/3947,c43974/f3p9/3659,c45749/f5p11/4002,c58993/f3p8/3878,c61978/f1p0/3814,c63749/f7p10/3714,c52129/f1p0/3669,c62740/f1p0/3690
chr14	Alternative 5' splice site	189170	189131	-	chr14:184339-189865C	c64081/f1p2/3803,c55445/f1p4/3866
chr14	Intron retention	18788794	18788611	-	chr14:18787535-18790206C	c24580/f1p1/1727,c18463/f1p0/1616,c24877/f1p0/1539
chr14	Alternative 3' splice site	19315506	19315513	+	chr14:19313195-19329950W	c55638/f1p0/3559,c23141/f1p0/3163
chr14	Intron retention	19316095	19316178	+	chr14:19313195-19329950W	c55638/f1p0/3559,c23141/f1p0/3163
chr14	Intron retention	19316330	19317255	+	chr14:19313195-19329950W	c55638/f1p0/3559,c23141/f1p0/3163
chr14	Alternative 3' splice site	19317564	19317591	+	chr14:19313195-19329950W	c23141/f1p0/3163,c55638/f1p0/3559
chr14	Intron retention	19517210	19517280	+	chr14:19516742-19521931W	c62836/f1p0/3932,c23428/f1p1/3439,c55904/f1p0/4365.1
chr14	Intron retention	19593136	19593233	+	chr14:19591954-19595156W	c8273/f1p0/1802,c2828/f1p0/1827
chr14	Intron retention	19594776	19594849	+	chr14:19591954-19595156W	c2828/f1p0/1827,c8273/f1p0/1802
chr14	Intron retention	19750412	19751597	+	chr14:19743731-19754120W	c43072/f1p1/2810,c5518/f1p0/2025
chr14	Intron retention	19750412	19751597	+	chr14:19743731-19754120W	c43072/f1p1/2810,c11075/f2p1/1921
chr14	Intron retention	19750412	19751597	+	chr14:19743731-19754120W	c43072/f1p1/2810,c10636/f1p0/1888,c24668/f1p0/8314.1,c50362/f1p0/3814,c6079/f1p1/1944,c7431/f1p1/1803,c870/f8p1/1989
chr14	Intron retention	19750412	19751225	+	chr14:19743731-19754120W	c43072/f1p1/2810,c15220/f1p1/2142
chr14	Intron retention	19751121	19751276	+	chr14:19743731-19754120W	c5518/f1p0/2025,c11075/f2p1/1921
chr14	Intron retention	19751121	19751225	+	chr14:19743731-19754120W	c5518/f1p0/2025,c10636/f1p0/1888,c20737/f1p0/1524,c24668/f1p0/8314.1,c50362/f1p0/3814,c6079/f1p1/1944,c7431/f1p1/1803,c870/f8p1/1989
chr14	Alternative 3' splice site	19751225	19751276	+	chr14:19743731-19754120W	c10636/f1p0/1888,c20737/f1p0/1524,c24668/f1p0/8314.1,c50362/f1p0/3814,c6079/f1p1/1944,c7431/f1p1/1803,c870/f8p1/1989,c11075/f2p1/1921
chr14	Intron retention	19751419	19751597	+	chr14:19743731-19754120W	c15220/f1p1/2142,c10636/f1p0/1888,c20737/f1p0/1524,c24668/f1p0/8314.1,c50362/f1p0/3814,c6079/f1p1/1944,c7431/f1p1/1803,c870/f8p1/1989
chr14	Alternative 3' splice site	206139	206160	+	chr14:204941-210556W	c11446/f1p0/8044.4,c2558/f2p0/2182,c256/f20p0/2136,c5319/f1p0/2217,c6400/f1p0/2153.1,c11827/f1p0/2211,c12255/f1p0/2017
chr14	Alternative 3' splice site	206633	206677	+	chr14:204941-210556W	c2558/f2p0/2182,c11446/f1p0/8044.4,c11827/f1p0/2211,c12255/f1p0/2017,c256/f20p0/2136,c5319/f1p0/2217,c6400/f1p0/2153.1
chr14	Intron retention	208716	208808	+	chr14:204941-210556W	c11827/f1p0/2211,c11823/f1p0/7280.2,c12255/f1p0/2017,c25303/f1p0/1641,c2558/f2p0/2182,c256/f20p0/2136,c6400/f1p0/2153.1
chr14	Intron retention	208852	208931	+	chr14:204941-210556W	c5319/f1p0/2217,c11823/f1p0/7280.2,c12255/f1p0/2017,c25303/f1p0/1641,c2558/f2p0/2182,c256/f20p0/2136,c6400/f1p0/2153.1
chr14	Exon skipping	20565334	20565284	-	chr14:20564322-20571254C	c12341/f1p0/2214,c34323/f1p0/3043,c20204/f1p0/2901
chr14	Intron retention	20565487	20565204	-	chr14:20564322-20571254C	c42996/f1p0/3468,c34323/f1p0/3043
chr14	Intron retention	20567231	20566617	-	chr14:20564322-20571254C	c34323/f1p0/3043,c42996/f1p0/3468,c20204/f1p0/2901
chr14	Alternative 5' splice site	20567261	20567231	-	chr14:20564322-20571254C	c12341/f1p0/2214,c20204/f1p0/2901
chr14	Intron retention	20567261	20566617	-	chr14:20564322-20571254C	c34323/f1p0/3043,c42996/f1p0/3468,c12341/f1p0/2214
chr14	Intron retention	20568933	20568826	-	chr14:20564322-20571254C	c34323/f1p0/3043,c12341/f1p0/2214,c20204/f1p0/2901,c42996/f1p0/3468
chr14	Alternative 3' splice site	20571003	20570345	-	chr14:20564322-20571254C	c20204/f1p0/2901,c12341/f1p0/2214,c34323/f1p0/3043,c42996/f1p0/3468
chr14	Intron retention	20970485	20969858	-	chr14:20964156-20970831C	c43406/f1p0/3050,c23368/f1p0/2380
chr14	Exon skipping	21066899	21066416	-	chr14:21059235-21067568C	c10704/f1p0/1981,c44798/f1p0/2689.1
chr14	Exon skipping	21067312	21066416	-	chr14:21059235-21067568C	c10704/f1p0/1981,c32901/f1p0/2609
chr14	Alternative 3' splice site	21151216	21151236	+	chr14:21144867-21158873W	c15339/f1p0/3431,c43614/f5p5/3844,c47262/f1p0/3682.2,c49641/f4p3/3733,c51136/f2p1/3670,c52230/f1p1/3841,c60227/f1p3/3844,c62556/f1p0/3779,c63092/f3p4/3736,c60464/f1p1/3757
chr14	Intron retention	21153893	21154028	+	chr14:21144867-21158873W	c52230/f1p1/3841,c62556/f1p0/3779,c15339/f1p0/3431,c43614/f5p5/3844,c49641/f4p3/3733,c51136/f2p1/3670,c60227/f1p3/3844,c60464/f1p1/3757,c63092/f3p4/3736
chr14	Intron retention	21355214	21355176	-	chr14:21337972-21356519C	c1072/f6p1/2001,c11348/f1p1/1901,c12880/f1p0/2141,c6882/f1p1/2013,c8791/f2p0/2048,c5699/f1p0/1973
chr14	Exon skipping	21355532	21355475	-	chr14:21337972-21356519C	c1072/f6p1/2001,c5699/f1p0/1973,c11348/f1p1/1901,c12880/f1p0/2141,c6882/f1p1/2013,c8791/f2p0/2048
chr14	Intron retention	218790	220345	+	chr14:214088-222776W	c56715/f1p0/3453,c21478/f2p1/3111
chr14	Intron retention	218790	221005	+	chr14:214088-222776W	c56715/f1p0/3453,c14117/f5p2/2590,c27324/f1p2/2987,c34412/f1p0/2704.2
chr14	Intron retention	220417	221005	+	chr14:214088-222776W	c21478/f2p1/3111,c14117/f5p2/2590,c27324/f1p2/2987,c34412/f1p0/2704.2
chr14	Intron retention	21644275	21644517	+	chr14:21640194-21646222W	c40650/f1p0/2957.1,c28826/f1p1/2475,c39779/f1p1/4128.1
chr14	Alternative 3' splice site	21837412	21837395	-	chr14:21834607-21854249C	c11471/f1p0/2142,c9706/f1p0/2158
chr14	Intron retention	21838012	21837906	-	chr14:21834607-21854249C	c11471/f1p0/2142,c9706/f1p0/2158
chr14	Alternative 3' splice site	21873667	21873683	+	chr14:21872113-21878391W	c60642/f1p2/3648,c15247/f1p0/3349,c18682/f1p0/2975,c20499/f2p1/3412,c29966/f1p1/3380.1,c30057/f1p2/3440,c31175/f1p1/3337,c32911/f1p0/3295,c39074/f1p1/3231,c43564/f1p0/3536,c44163/f2p2/3299,c60524/f1p0/3769.1,c61231/f1p0/3495
chr14	Intron retention	21873818	21874034	+	chr14:21872113-21878391W	c53912/f1p0/3979,c15247/f1p0/3349,c18682/f1p0/2975,c20499/f2p1/3412,c30057/f1p2/3440,c31175/f1p1/3337,c32911/f1p0/3295,c43564/f1p0/3536,c44163/f2p2/3299,c60524/f1p0/3769.1,c61231/f1p0/3495
chr14	Intron retention	21873818	21874122	+	chr14:21872113-21878391W	c53912/f1p0/3979,c29966/f1p1/3380.1,c39074/f1p1/3231
chr14	Alternative 3' splice site	21874034	21874122	+	chr14:21872113-21878391W	c15247/f1p0/3349,c18682/f1p0/2975,c20499/f2p1/3412,c30057/f1p2/3440,c31175/f1p1/3337,c32911/f1p0/3295,c43564/f1p0/3536,c44163/f2p2/3299,c60524/f1p0/3769.1,c60642/f1p2/3648,c61231/f1p0/3495,c29966/f1p1/3380.1,c39074/f1p1/3231
chr14	Alternative 3' splice site	21875698	21875775	+	chr14:21872113-21878391W	c20499/f2p1/3412,c29966/f1p1/3380.1,c30057/f1p2/3440,c31175/f1p1/3337,c32911/f1p0/3295,c44163/f2p2/3299,c60524/f1p0/3769.1,c60642/f1p2/3648,c39074/f1p1/3231
chr14	Intron retention	21875849	21875934	+	chr14:21872113-21878391W	c15247/f1p0/3349,c18682/f1p0/2975,c43564/f1p0/3536,c53912/f1p0/3979,c61231/f1p0/3495,c20499/f2p1/3412,c29966/f1p1/3380.1,c30057/f1p2/3440,c31175/f1p1/3337,c32911/f1p0/3295,c44163/f2p2/3299,c60524/f1p0/3769.1,c60642/f1p2/3648
chr14	Intron retention	22015426	22014942	-	chr14:22014125-22022271C	c33529/f1p0/3003,c44417/f1p0/2716
chr14	Alternative 3' splice site	22018399	22018352	-	chr14:22014125-22022271C	c44417/f1p0/2716,c33529/f1p0/3003
chr14	Alternative 3' splice site	22332664	22332668	+	chr14:22325544-22341773W	c51848/f1p1/4144,c59521/f1p1/3659,c35951/f1p0/2846
chr14	Alternative 3' splice site	22618717	22618716	-	chr14:22618135-22623001C	c24879/f1p2/1688,c10195/f2p2/1798
chr14	Intron retention	22817433	22817961	+	chr14:22812934-22819934W	c15447/f1p0/2691,c1439/f3p0/2215,c31309/f1p0/2053
chr14	Intron retention	22959983	22959482	-	chr14:22958145-22965248C	c33505/f1p0/3315,c34963/f1p0/3059,c52202/f1p0/3863,c53894/f1p1/4043
chr14	Alternative 5' splice site	23089042	23089041	-	chr14:23084607-23093145C	c28168/f1p0/3206,c52234/f1p3/3950,c57454/f1p0/3953
chr14	Intron retention	23091758	23091615	-	chr14:23084607-23093145C	c57454/f1p0/3953,c46214/f4p7/3850,c52234/f1p3/3950,c58014/f1p6/3912,c59611/f1p4/4060
chr14	Alternative 3' splice site	23103986	23104030	+	chr14:23103470-23107334W	c13977/f6p1/2703,c43170/f1p0/10436.1,c24030/f1p1/2673
chr14	Intron retention	23333153	23332560	-	chr14:23329488-23339203C	c52276/f1p2/4020,c16292/f1p2/1768,c18156/f1p1/3105,c27296/f3p3/2496,c32520/f1p3/2612
chr14	Alternative 5' splice site	23337313	23336746	-	chr14:23329488-23339203C	c16292/f1p2/1768,c27296/f3p3/2496,c32520/f1p3/2612,c52276/f1p2/4020,c18156/f1p1/3105
chr14	Intron retention	23994881	23994797	-	chr14:23994104-23995881C	c39935/f1p0/1368,c41973/f1p0/1196
chr14	Intron retention	23995317	23995227	-	chr14:23994104-23995881C	c39935/f1p0/1368,c41973/f1p0/1196
chr14	Intron retention	24040538	24040658	+	chr14:24039680-24043147W	c2776/f1p0/1862,c12909/f1p0/2109,c4848/f1p0/2213,c6915/f1p0/1402,c9426/f1p0/1726
chr14	Intron retention	24041132	24041924	+	chr14:24039680-24043147W	c12909/f1p0/2109,c4848/f1p0/2213,c18306/f1p0/1815,c6915/f1p0/1402
chr14	Intron retention	24041132	24041510	+	chr14:24039680-24043147W	c12909/f1p0/2109,c4848/f1p0/2213,c2776/f1p0/1862,c9426/f1p0/1726
chr14	Intron retention	24041570	24041924	+	chr14:24039680-24043147W	c2776/f1p0/1862,c9426/f1p0/1726,c18306/f1p0/1815,c6915/f1p0/1402
chr14	Intron retention	24161259	24161510	+	chr14:24072628-24494771W	c2786/f1p0/1896,c12375/f1p0/1499
chr14	Intron retention	24354087	24353996	-	chr14:24351760-24355638C	c35179/f1p1/2730,c41975/f1p0/2740,c33615/f1p0/2649
chr14	Alternative 3' splice site	24557915	24557912	-	chr14:24553588-24559040C	c56343/f1p1/3796,c49505/f3p2/3935
chr14	Intron retention	24647030	24646935	-	chr14:24646166-24652882C	c5861/f1p0/1709,c48208/f1p0/3720
chr14	Alternative 3' splice site	24865258	24865259	+	chr14:24863628-24871411W	c38360/f3p3/3810,c60017/f1p3/3697,c27075/f1p1/3090
chr14	Intron retention	25463979	25463836	-	chr14:25461072-25468522C	c47700/f1p1/3776,c51157/f2p0/3902,c51756/f1p1/3888
chr14	Intron retention	25464592	25464413	-	chr14:25461072-25468522C	c59822/f1p0/3917.1,c51566/f1p0/3835.1
chr14	Intron retention	25464592	25464413	-	chr14:25461072-25468522C	c47700/f1p1/3776,c51157/f2p0/3902,c56341/f1p0/3720
chr14	Intron retention	25464889	25464800	-	chr14:25461072-25468522C	c41441/f1p0/3941,c56341/f1p0/3720,c62773/f1p0/3938,c60502/f1p0/3849
chr14	Alternative 5' splice site	25464895	25464889	-	chr14:25461072-25468522C	c33628/f1p0/2962,c51566/f1p0/3835.1,c59822/f1p0/3917.1,c60502/f1p0/3849
chr14	Intron retention	25464895	25464800	-	chr14:25461072-25468522C	c41441/f1p0/3941,c56341/f1p0/3720,c62773/f1p0/3938,c33628/f1p0/2962,c51566/f1p0/3835.1
chr14	Intron retention	25464895	25464413	-	chr14:25461072-25468522C	c50890/f1p0/3971,c51756/f1p1/3888,c57306/f1p0/3908,c33628/f1p0/2962
chr14	Intron retention	25464895	25464800	-	chr14:25461072-25468522C	c47700/f1p1/3776,c51157/f2p0/3902,c59822/f1p0/3917.1
chr14	Intron retention	25464895	25464413	-	chr14:25461072-25468522C	c47700/f1p1/3776,c51157/f2p0/3902,c51566/f1p0/3835.1
chr14	Exon skipping	25467052	25466994	-	chr14:25461072-25468522C	c47700/f1p1/3776,c50890/f1p0/3971,c33628/f1p0/2962,c51157/f2p0/3902,c51566/f1p0/3835.1,c51756/f1p1/3888,c55231/f1p0/4169.1,c56341/f1p0/3720,c59822/f1p0/3917.1,c60624/f1p0/4017,c62773/f1p0/3938
chr14	Exon skipping	25467404	25467279	-	chr14:25461072-25468522C	c33628/f1p0/2962,c51157/f2p0/3902,c51566/f1p0/3835.1,c51756/f1p1/3888,c55231/f1p0/4169.1,c56341/f1p0/3720,c59822/f1p0/3917.1,c60624/f1p0/4017,c62773/f1p0/3938,c50231/f1p0/3832,c60502/f1p0/3849
chr14	Exon skipping	25467404	25466994	-	chr14:25461072-25468522C	c47700/f1p1/3776,c50890/f1p0/3971,c50231/f1p0/3832,c60502/f1p0/3849
chr14	Alternative 3' splice site	25467727	25467711	-	chr14:25461072-25468522C	c33628/f1p0/2962,c50231/f1p0/3832,c50890/f1p0/3971,c51157/f2p0/3902,c56341/f1p0/3720,c60502/f1p0/3849,c60624/f1p0/4017,c47700/f1p1/3776,c51566/f1p0/3835.1,c62773/f1p0/3938
chr14	Intron retention	25901029	25901217	+	chr14:25897704-25904498W	c54047/f1p0/3748.2,c19824/f1p0/3690.1,c20789/f1p0/3274,c28434/f1p0/2553,c32305/f1p0/2775,c5045/f1p0/1928
chr14	Intron retention	25901912	25902438	+	chr14:25897704-25904498W	c19824/f1p0/3690.1,c32305/f1p0/2775
chr14	Alternative 3' splice site	26202933	26202891	-	chr14:26191832-26204005C	c16129/f1p3/2012,c5722/f2p0/1992,c10563/f1p2/2096.1
chr14	Intron retention	27475657	27475644	-	chr14:27472118-27476556C	c22537/f1p0/2132,c6221/f1p0/1983,c10663/f1p0/2201
chr14	Intron retention	27601603	27601307	-	chr14:27600738-27606698C	c43114/f1p0/2915,c29316/f1p1/2744
chr14	Intron retention	27601916	27601661	-	chr14:27600738-27606698C	c29316/f1p1/2744,c50271/f1p0/3890.1,c10164/f4p0/2379,c17021/f1p0/2883,c17622/f1p1/3085,c30394/f2p0/2902,c33199/f1p0/2420,c33631/f1p0/2621,c34241/f1p1/3023,c43457/f2p0/3047
chr14	Intron retention	27601916	27601307	-	chr14:27600738-27606698C	c43114/f1p0/2915,c10164/f4p0/2379,c17622/f1p1/3085
chr14	Intron retention	27602950	27602820	-	chr14:27600738-27606698C	c17622/f1p1/3085,c43457/f2p0/3047,c50271/f1p0/3890.1,c17021/f1p0/2883
chr14	Alternative 3' splice site	27603447	27602820	-	chr14:27600738-27606698C	c30394/f2p0/2902,c34241/f1p1/3023,c10164/f4p0/2379,c29316/f1p1/2744,c33199/f1p0/2420,c33631/f1p0/2621,c43114/f1p0/2915
chr14	Alternative 5' splice site	27603542	27602950	-	chr14:27600738-27606698C	c10164/f4p0/2379,c29316/f1p1/2744,c33199/f1p0/2420,c43114/f1p0/2915,c17021/f1p0/2883
chr14	Intron retention	27603542	27602820	-	chr14:27600738-27606698C	c17622/f1p1/3085,c43457/f2p0/3047,c50271/f1p0/3890.1,c10164/f4p0/2379,c29316/f1p1/2744,c33199/f1p0/2420,c43114/f1p0/2915
chr14	Intron retention	27603542	27603447	-	chr14:27600738-27606698C	c17622/f1p1/3085,c43457/f2p0/3047,c50271/f1p0/3890.1,c30394/f2p0/2902,c34241/f1p1/3023
chr14	Intron retention	27604012	27603640	-	chr14:27600738-27606698C	c33631/f1p0/2621,c10164/f4p0/2379,c29316/f1p1/2744,c30394/f2p0/2902,c33199/f1p0/2420,c34241/f1p1/3023,c43114/f1p0/2915
chr14	Alternative 3' splice site	27604804	27604796	-	chr14:27600738-27606698C	c10164/f4p0/2379,c33199/f1p0/2420,c33631/f1p0/2621,c34241/f1p1/3023,c50271/f1p0/3890.1,c17021/f1p0/2883,c43114/f1p0/2915,c43457/f2p0/3047
chr14	Intron retention	27605027	27604804	-	chr14:27600738-27606698C	c41258/f1p1/2886,c17622/f1p1/3085,c29316/f1p1/2744,c30394/f2p0/2902
chr14	Alternative 5' splice site	27605037	27605027	-	chr14:27600738-27606698C	c10164/f4p0/2379,c33199/f1p0/2420,c33631/f1p0/2621,c34241/f1p1/3023,c50271/f1p0/3890.1,c17622/f1p1/3085,c29316/f1p1/2744,c30394/f2p0/2902
chr14	Intron retention	27605037	27604804	-	chr14:27600738-27606698C	c41258/f1p1/2886,c10164/f4p0/2379,c33199/f1p0/2420,c33631/f1p0/2621,c34241/f1p1/3023,c50271/f1p0/3890.1
chr14	Intron retention	27605037	27604796	-	chr14:27600738-27606698C	c41258/f1p1/2886,c17021/f1p0/2883,c43114/f1p0/2915,c43457/f2p0/3047
chr14	Intron retention	27774541	27773973	-	chr14:27772137-27826279C	c56654/f1p0/3875,c16469/f2p1/3174,c18253/f1p0/3069,c18848/f1p0/3351,c32339/f1p0/3293,c34665/f4p0/3120
chr14	Intron retention	27775250	27775175	-	chr14:27772137-27826279C	c32339/f1p0/3293,c56654/f1p0/3875,c16469/f2p1/3174,c18253/f1p0/3069,c18848/f1p0/3351,c34665/f4p0/3120
chr14	Alternative 3' splice site	27778493	27778452	-	chr14:27772137-27826279C	c16469/f2p1/3174,c18848/f1p0/3351,c32339/f1p0/3293,c34665/f4p0/3120,c56654/f1p0/3875,c18253/f1p0/3069
chr14	Exon skipping	27779370	27779295	-	chr14:27772137-27826279C	c16469/f2p1/3174,c18848/f1p0/3351,c32339/f1p0/3293,c34665/f4p0/3120,c56654/f1p0/3875
chr14	Alternative 5' splice site	27780833	27780823	-	chr14:27772137-27826279C	c18253/f1p0/3069,c16469/f2p1/3174
chr14	Alternative 5' splice site	27782747	27782733	-	chr14:27772137-27826279C	c32339/f1p0/3293,c16469/f2p1/3174,c18253/f1p0/3069,c18848/f1p0/3351,c34665/f4p0/3120,c56654/f1p0/3875
chr14	Alternative 3' splice site	27783489	27783455	-	chr14:27772137-27826279C	c32339/f1p0/3293,c16469/f2p1/3174,c18253/f1p0/3069,c18848/f1p0/3351,c34665/f4p0/3120,c56654/f1p0/3875
chr14	Intron retention	28156302	28156459	+	chr14:28156083-28162790W	c52505/f1p1/3815,c41485/f2p1/3583,c54392/f1p0/4058
chr14	Intron retention	28156302	28156459	+	chr14:28156083-28162790W	c46350/f2p3/3922,c49500/f4p1/3959,c51788/f2p0/3760,c57475/f1p0/3572,c57843/f10p9/3809
chr14	Exon skipping	28156459	28156524	+	chr14:28156083-28162790W	c43252/f1p0/3798,c37842/f7p7/3813,c38223/f15p9/3702,c41485/f2p1/3583,c54254/f5p4/3838,c54392/f1p0/4058,c55844/f1p0/6067.1,c57475/f1p0/3572,c57843/f10p9/3809,c63545/f1p7/3737
chr14	Alternative 3' splice site	28158798	28158824	+	chr14:28156083-28162790W	c37842/f7p7/3813,c38223/f15p9/3702,c41485/f2p1/3583,c43252/f1p0/3798,c46350/f2p3/3922,c46372/f1p1/3862,c49500/f4p1/3959,c49638/f2p2/3906,c49694/f2p1/3951,c51788/f2p0/3760,c52505/f1p1/3815,c54254/f5p4/3838,c54392/f1p0/4058,c55844/f1p0/6067.1,c57843/f10p9/3809,c63545/f1p7/3737,c57475/f1p0/3572
chr14	Alternative 3' splice site	28160229	28160234	+	chr14:28156083-28162790W	c46372/f1p1/3862,c54254/f5p4/3838,c55844/f1p0/6067.1,c38223/f15p9/3702
chr14	Alternative 3' splice site	28160229	28160239	+	chr14:28156083-28162790W	c46372/f1p1/3862,c54254/f5p4/3838,c55844/f1p0/6067.1,c57475/f1p0/3572
chr14	Alternative 3' splice site	28160229	28160233	+	chr14:28156083-28162790W	c46372/f1p1/3862,c54254/f5p4/3838,c55844/f1p0/6067.1,c41485/f2p1/3583,c49638/f2p2/3906
chr14	Alternative 3' splice site	28160229	28160232	+	chr14:28156083-28162790W	c46372/f1p1/3862,c54254/f5p4/3838,c55844/f1p0/6067.1,c43252/f1p0/3798,c49500/f4p1/3959,c54392/f1p0/4058,c57843/f10p9/3809
chr14	Alternative 3' splice site	28160232	28160233	+	chr14:28156083-28162790W	c49694/f2p1/3951,c52505/f1p1/3815
chr14	Alternative 3' splice site	28160232	28160233	+	chr14:28156083-28162790W	c46350/f2p3/3922,c63545/f1p7/3737,c37842/f7p7/3813,c51788/f2p0/3760
chr14	Alternative 3' splice site	28160232	28160234	+	chr14:28156083-28162790W	c43252/f1p0/3798,c49500/f4p1/3959,c54392/f1p0/4058,c57843/f10p9/3809,c38223/f15p9/3702
chr14	Alternative 3' splice site	28160232	28160239	+	chr14:28156083-28162790W	c43252/f1p0/3798,c49500/f4p1/3959,c54392/f1p0/4058,c57843/f10p9/3809,c57475/f1p0/3572
chr14	Alternative 3' splice site	28160232	28160233	+	chr14:28156083-28162790W	c43252/f1p0/3798,c49500/f4p1/3959,c54392/f1p0/4058,c57843/f10p9/3809,c41485/f2p1/3583,c49638/f2p2/3906
chr14	Alternative 3' splice site	28160233	28160234	+	chr14:28156083-28162790W	c41485/f2p1/3583,c49638/f2p2/3906,c38223/f15p9/3702
chr14	Alternative 3' splice site	28160233	28160239	+	chr14:28156083-28162790W	c41485/f2p1/3583,c49638/f2p2/3906,c57475/f1p0/3572
chr14	Alternative 3' splice site	28160234	28160239	+	chr14:28156083-28162790W	c38223/f15p9/3702,c57475/f1p0/3572
chr14	Alternative 3' splice site	28509894	28509915	+	chr14:28506958-28514544W	c31749/f1p2/3092,c13539/f20p10/3074,c16131/f1p0/5935.2,c16467/f1p8/2836,c27607/f1p11/2909,c29645/f1p0/3930.2,c31531/f1p1/2681,c40097/f1p0/7044.3,c6157/f1p0/2087
chr14	Alternative 3' splice site	28563533	28563550	+	chr14:28541939-28565104W	c50030/f3p0/3852,c45436/f1p0/3902,c53818/f1p0/6043.1
chr14	Alternative 3' splice site	28649516	28649519	+	chr14:28646986-28657624W	c30880/f1p6/2956,c13576/f12p2/2874,c16655/f1p2/2682,c58671/f8p3/2880
chr14	Mutually exclusive exon	28649516	28654490	+	chr14:28646986-28657624W	c30880/f1p6/2956,c14138/f3p4/3010,c59027/f4p2/2843
chr14	Mutually exclusive exon	28649516	28654490	+	chr14:28646986-28657624W	c30880/f1p6/2956,c31817/f2p3/2722,c40318/f1p0/2770
chr14	Mutually exclusive exon	28649516	28655691	+	chr14:28646986-28657624W	c30880/f1p6/2956,c19089/f1p0/2859
chr14	Mutually exclusive exon	28649519	28654490	+	chr14:28646986-28657624W	c13576/f12p2/2874,c16655/f1p2/2682,c58671/f8p3/2880,c14138/f3p4/3010,c59027/f4p2/2843
chr14	Mutually exclusive exon	28649519	28654490	+	chr14:28646986-28657624W	c13576/f12p2/2874,c16655/f1p2/2682,c58671/f8p3/2880,c31817/f2p3/2722,c40318/f1p0/2770
chr14	Mutually exclusive exon	28649519	28655691	+	chr14:28646986-28657624W	c13576/f12p2/2874,c16655/f1p2/2682,c58671/f8p3/2880,c19089/f1p0/2859
chr14	Alternative 3' splice site	28654055	28654058	+	chr14:28646986-28657624W	c14138/f3p4/3010,c19089/f1p0/2859,c59027/f4p2/2843,c31817/f2p3/2722,c40318/f1p0/2770
chr14	Exon skipping	28655610	28655691	+	chr14:28646986-28657624W	c14138/f3p4/3010,c31817/f2p3/2722,c40318/f1p0/2770,c59027/f4p2/2843,c19089/f1p0/2859
chr14	Intron retention	28695261	28695361	+	chr14:28692842-28700026W	c41124/f1p1/2971,c13882/f7p16/2856,c17144/f1p1/3331.1,c23584/f7p11/2881,c27531/f1p0/3013,c28583/f1p0/3723.2,c34499/f1p2/2873
chr14	Intron retention	28695978	28696092	+	chr14:28692842-28700026W	c41124/f1p1/2971,c13882/f7p16/2856,c17144/f1p1/3331.1,c23374/f1p0/3284,c23584/f7p11/2881,c27531/f1p0/3013,c34499/f1p2/2873
chr14	Exon skipping	28696896	28696960	+	chr14:28692842-28700026W	c13882/f7p16/2856,c17144/f1p1/3331.1,c23374/f1p0/3284,c23584/f7p11/2881,c27531/f1p0/3013,c28583/f1p0/3723.1,c41124/f1p1/2971,c34499/f1p2/2873
chr14	Intron retention	28775031	28774553	-	chr14:28772341-29023429C	c60699/f1p3/3880,c40701/f1p0/6792.2
chr14	Alternative 3' splice site	28976618	28976587	-	chr14:28975895-28979988C	c9166/f3p0/2093,c1717/f4p0/1880,c1923/f5p1/2066,c24509/f1p0/1893
chr14	Exon skipping	28979124	28978996	-	chr14:28975895-28979988C	c24509/f1p0/1893,c1717/f4p0/1880,c1923/f5p1/2066,c9166/f3p0/2093
chr14	Intron retention	29015283	29016865	+	chr14:29014087-29017291W	c27629/f1p0/2558,c7746/f1p0/1815
chr14	Exon skipping	29015439	29015530	+	chr14:29014087-29017291W	c11716/f1p1/1904,c1805/f3p0/1754,c2501/f2p1/1793,c27363/f1p0/1757,c7746/f1p0/1815,c25043/f1p0/1714
chr14	Intron retention	29016197	29016360	+	chr14:29014087-29017291W	c11716/f1p1/1904,c2501/f2p1/1793,c1805/f3p0/1754,c25043/f1p0/1714,c27363/f1p0/1757
chr14	Alternative 3' splice site	29033064	29033074	+	chr14:29030782-29035589W	c10638/f1p0/2038,c7099/f1p0/2187
chr14	Intron retention	29038655	29038769	+	chr14:29036417-29043150W	c40654/f1p0/3070.2,c43668/f1p0/2800,c32955/f1p0/2717,c44968/f1p1/2688
chr14	Intron retention	29050376	29049193	-	chr14:29048545-29052417C	c41032/f1p0/3034,c1782/f3p0/1944
chr14	Alternative 3' splice site	29051389	29051379	-	chr14:29048545-29052417C	c8702/f1p0/1841,c9125/f1p0/1921,c16875/f1p0/1753,c1782/f3p0/1944,c18124/f1p0/2155
chr14	Alternative 5' splice site	29052168	29052121	-	chr14:29048545-29052417C	c8702/f1p0/1841,c9125/f1p0/1921
chr14	Alternative 3' splice site	29066780	29066835	+	chr14:29063115-29079553W	c40186/f1p2/4062,c46713/f4p6/3954,c58210/f7p9/4255,c60749/f1p11/4082,c61647/f1p0/4474,c62396/f1p0/4131,c61065/f1p0/3925
chr14	Alternative 3' splice site	29076302	29076303	+	chr14:29063115-29079553W	c58210/f7p9/4255,c60073/f1p6/3323,c62396/f1p0/4131,c61647/f1p0/4474
chr14	Alternative 3' splice site	29620736	29620717	-	chr14:29615026-29628909C	c51758/f2p2/3859,c61590/f1p3/3912
chr14	Exon skipping	29661162	29661110	-	chr14:29656272-29662093C	c22634/f2p4/2766,c44144/f1p0/2963,c14024/f6p4/2945,c14325/f7p6/2820,c18949/f1p3/3066
chr14	Alternative 5' splice site	29659056	29658941	-	chr14:29656586-29661983C	c17651/f4p1/2632,c21783/f1p1/3331,c61730/f1p0/3990.1,c40898/f1p4/2761
chr14	Intron retention	29661761	29661014	-	chr14:29656586-29661983C	c21783/f1p1/3331,c40898/f1p4/2761
chr14	Exon skipping	29852549	29852604	+	chr14:29850510-29854725W	c39199/f1p0/3063,c16194/f1p3/3020,c26180/f6p4/2898,c28035/f3p0/2928,c31328/f1p0/2722,c31895/f1p3/3093,c32615/f1p3/3218
chr14	Intron retention	29853248	29853354	+	chr14:29850510-29854725W	c31895/f1p3/3093,c32615/f1p3/3218,c39199/f1p0/3063,c16194/f1p3/3020,c26180/f6p4/2898,c28035/f3p0/2928,c31328/f1p0/2722
chr14	Alternative 5' splice site	29854402	29854405	+	chr14:29850510-29854725W	c16194/f1p3/3020,c31895/f1p3/3093
chr14	Intron retention	30899828	30899395	-	chr14:30890218-30904507C	c51637/f1p0/3843,c13679/f7p3/3434,c19884/f1p0/3254,c27556/f1p1/3319,c53301/f1p2/3649,c54887/f1p0/4193.2,c63332/f1p0/3277,c63564/f3p3/3552,c64083/f5p3/3436
chr14	Alternative 3' splice site	30901932	30901352	-	chr14:30890218-30904507C	c27556/f1p1/3319,c13679/f7p3/3434,c19884/f1p0/3254,c51637/f1p0/3843,c63332/f1p0/3277,c63564/f3p3/3552,c64083/f5p3/3436
chr14	Intron retention	30902801	30902795	-	chr14:30890218-30904507C	c19884/f1p0/3254,c27556/f1p1/3319,c64083/f5p3/3436,c13679/f7p3/3434,c51637/f1p0/3843,c63332/f1p0/3277,c63564/f3p3/3552
chr14	Intron retention	31122417	31121818	-	chr14:31113986-31128650C	c50494/f1p0/4144,c28644/f1p1/3015,c33304/f1p1/3168,c40497/f1p0/2817,c45600/f1p0/3342
chr14	Alternative 3' splice site	31126317	31126295	-	chr14:31113986-31128650C	c28644/f1p1/3015,c51327/f1p1/3775.1,c57275/f1p1/3727.1,c33304/f1p1/3168,c40497/f1p0/2817,c45600/f1p0/3342
chr14	Intron retention	31126422	31126317	-	chr14:31113986-31128650C	c50494/f1p0/4144,c28644/f1p1/3015,c51327/f1p1/3775.1,c57275/f1p1/3727.1
chr14	Intron retention	31126422	31126295	-	chr14:31113986-31128650C	c50494/f1p0/4144,c33304/f1p1/3168,c40497/f1p0/2817,c45600/f1p0/3342
chr14	Intron retention	32061676	32061785	+	chr14:32059029-32066177W	c54710/f1p0/3630,c26430/f1p0/3353,c41880/f1p0/3736.1,c46720/f1p0/3425,c47790/f1p0/3190,c54874/f1p0/3984.1
chr14	Intron retention	32470889	32470803	-	chr14:32467921-32635698C	c11778/f1p0/1767,c22947/f1p0/1980,c31849/f1p0/1677,c6243/f1p1/1583,c695/f7p1/1673,c8111/f1p2/1737
chr14	Intron retention	33360500	33361457	+	chr14:33359431-33366981W	c49860/f2p0/3820,c50260/f1p0/3625,c52917/f2p0/3840,c61565/f1p0/3652,c33906/f1p0/2790
chr14	Alternative 3' splice site	33362557	33362621	+	chr14:33359431-33366981W	c17050/f1p0/3338.1,c49860/f2p0/3820,c50260/f1p0/3625,c52917/f2p0/3840,c61565/f1p0/3652,c61958/f1p0/3958,c33906/f1p0/2790
chr14	Alternative 3' splice site	33364729	33364733	+	chr14:33359431-33366981W	c33906/f1p0/2790,c61565/f1p0/3652,c49860/f2p0/3820,c50260/f1p0/3625,c52917/f2p0/3840,c61958/f1p0/3958
chr14	Alternative 5' splice site	33365691	33365697	+	chr14:33359431-33366981W	c33906/f1p0/2790,c49860/f2p0/3820,c50260/f1p0/3625,c52917/f2p0/3840,c61565/f1p0/3652,c61958/f1p0/3958
chr14	Alternative 3' splice site	33365782	33365818	+	chr14:33359431-33366981W	c49860/f2p0/3820,c50260/f1p0/3625,c52917/f2p0/3840,c61565/f1p0/3652,c61958/f1p0/3958,c17050/f1p0/3338.2
chr14	Intron retention	33402252	33402116	-	chr14:33401328-33986557C	c40313/f1p0/4287,c51474/f1p0/3788,c57150/f1p0/4015,c57303/f1p0/3739,c60793/f1p0/3497
chr14	Intron retention	33402494	33402116	-	chr14:33401328-33986557C	c55297/f1p0/3694,c51474/f1p0/3788
chr14	Alternative 5' splice site	33402512	33402494	-	chr14:33401328-33986557C	c57150/f1p0/4015,c57303/f1p0/3739,c60793/f1p0/3497,c40313/f1p0/4287
chr14	Intron retention	33402701	33402571	-	chr14:33401328-33986557C	c40313/f1p0/4287,c51474/f1p0/3788
chr14	Alternative 3' splice site	34025640	34026334	+	chr14:34025262-34032956W	c61416/f1p0/4680.1,c22844/f6p5/3331
chr14	Alternative 3' splice site	34025640	34026063	+	chr14:34025262-34032956W	c61416/f1p0/4680.1,c51640/f1p3/3664
chr14	Alternative 3' splice site	34026063	34026334	+	chr14:34025262-34032956W	c51640/f1p3/3664,c22844/f6p5/3331
chr14	Intron retention	34030884	34030999	+	chr14:34025262-34032956W	c51640/f1p3/3664,c22844/f6p5/3331,c29543/f1p6/2886,c55163/f1p6/4102,c61416/f1p0/4680.1
chr14	Alternative 5' splice site	34094155	34094143	-	chr14:34080705-34334242C	c51698/f1p1/3808,c15858/f1p1/2718,c46758/f2p2/3743
chr14	Intron retention	34833759	34833989	+	chr14:34832568-34840178W	c19618/f1p2/3000,c19250/f6p4/2809,c23041/f1p0/2752.2,c29078/f1p3/2760,c31036/f1p0/2731.2,c35440/f1p0/2795,c39023/f1p1/3069.1
chr14	Intron retention	34833759	34833860	+	chr14:34832568-34840178W	c19618/f1p2/3000,c46291/f1p0/2811
chr14	Alternative 3' splice site	34833860	34833989	+	chr14:34832568-34840178W	c46291/f1p0/2811,c19250/f6p4/2809,c23041/f1p0/2752.2,c29078/f1p3/2760,c31036/f1p0/2731.2,c35440/f1p0/2795,c39023/f1p1/3069.1
chr14	Alternative 3' splice site	34835614	34835634	+	chr14:34832568-34840178W	c19250/f6p4/2809,c19618/f1p2/3000,c23041/f1p0/2752.2,c29078/f1p3/2760,c39023/f1p1/3069.1,c46291/f1p0/2811,c35440/f1p0/2795
[truncated: 3,253 more rows]
